# Supplementary material for: The magnitude of the snow-sourced reactive nitrogen flux to the boundary layer in the Uintah Basin, Utah, USA
Source: Copernicus journal article supplement (doi:10.5194/acp-2016-320), 2016-05-17
Supplement: Supplementary file 1 [file acp-2016-320-supplement.zip]

Archive with 3 entries (3 files):
- Snow_SurfaceIrradiance_ActinicFlux.xlsx
- Zatko_etal_2016_SupplementaryMaterial.2.pdf
- Zatko_etal_2016_SupplementaryMaterial.pdf
