# Supplementary material for: The magnitude of the snow-sourced reactive nitrogen flux to the boundary layer in the Uintah Basin, Utah, USA
Source: Copernicus journal article supplement (doi:10.5194/acp-2016-320), 2016-05-17
Supplement: Supplementary file 1 [file acp-2016-320-supplement.zip › Snow_SurfaceIrradiance_ActinicFlux.xlsx]

## Sheet: January 15
		Surface Downwelling	Actinic Flux (photons/cm2*nm*s) at Various Snow Depths (cm)
Solar Zenith Angle	Wavelength(nm)	Irradiance (photons/cm2*s*nm)	0	1	2	3	4	5	6	7	8	9	10	11	12	13	14	15	16	17
90	280	0	0	0	0	0	0	0	0	0	0	0	0	0	0	0	0	0	0	0
90	281	0	0	0	0	0	0	0	0	0	0	0	0	0	0	0	0	0	0	0
90	282	0	0	0	0	0	0	0	0	0	0	0	0	0	0	0	0	0	0	0
90	283	0	0	0	0	0	0	0	0	0	0	0	0	0	0	0	0	0	0	0
90	284	0	0	0	0	0	0	0	0	0	0	0	0	0	0	0	0	0	0	0
90	285	0	0	0	0	0	0	0	0	0	0	0	0	0	0	0	0	0	0	0
90	286	0	0	0	0	0	0	0	0	0	0	0	0	0	0	0	0	0	0	0
90	287	0	0	0	0	0	0	0	0	0	0	0	0	0	0	0	0	0	0	0
90	288	0	0	0	0	0	0	0	0	0	0	0	0	0	0	0	0	0	0	0
90	289	0	0	0	0	0	0	0	0	0	0	0	0	0	0	0	0	0	0	0
90	290	0	0	0	0	0	0	0	0	0	0	0	0	0	0	0	0	0	0	0
90	291	118000000000	444346318860	180421896160	1.1802e+11	79276074520	5.95526e+10	45986812500	37315871600	2.96314e+10	24086365320	19933557100	16473025380	13085966360	10356174420	8.14113e+09	6178548440	4558758900	3119852740	1769099660
90	292	0	0	0	0	0	0	0	0	0	0	0	0	0	0	0	0	0	0	0
90	293	0	0	0	0	0	0	0	0	0	0	0	0	0	0	0	0	0	0	0
90	294	44200791231	1.66445e+11	6.7583e+10	4.42081e+10	2.96955e+10	2.23074e+10	1.72259e+10	1.39779e+10	1.10994e+10	9.02234e+09	7.46677e+09	6.17051e+09	4.90178e+09	3.87925e+09	3.04953e+09	2.31438e+09	1.70763e+09	1.16864e+09	6.62675e+08
90	295	0	0	0	0	0	0	0	0	0	0	0	0	0	0	0	0	0	0	0
90	296	283000000000	1065678035910	432706750960	283046853480	190128212620	142825291830	110290406250	89494844600	71065134650	57766452420	47806751350	39507340530	31384139660	2.48373e+10	1.95249e+10	1.4818e+10	10933294650	7482358690	4242840710
90	297	101000000000	384620511880	165210430840	111857033380	77855464180	60025948320	47489916190	3.92646e+10	31755970550	26211026110	21959187700	18354554260	1.47484e+10	11790157230	9.3479e+09	7152603860	5304996720	3608926950	2023035050
90	298	212000000000	807322262560	346778330080	234789020560	163419390160	125995059840	99681804280	8.24168e+10	66656096600	55017203320	46092552400	38526391120	3.09571e+10	24747656760	1.96213e+10	15013386320	11135240640	7575173400	4246370600
90	299	131000000000	498864228280	214282836040	145081894780	1.00981e+11	77855437920	61595831890	5.09274e+10	41188437050	33996479410	28481718700	23806402060	1.91292e+10	15292184130	1.21245e+10	9277139660	6880738320	4680885450	2623936550
90	300	168000000000	639764811840	274805469120	186059223840	1.29502e+11	99845141760	78993127920	6.53114e+10	52821812400	43598538480	36526173600	30530347680	2.45321e+10	19611350640	1.5549e+10	11897400480	8824152960	6002967600	3365048400
90	301	455000000000	1732696365400	744264812200	503910397900	350735011900	270413925600	213939721450	1.76885e+11	143059075250	118079375050	98925053500	82686358300	6.6441e+10	53114074650	4.21118e+10	32222126300	23898747600	16258037250	9113672750
90	302	26600000000	101296095208	43510865944	29459377108	20504508388	15808814112	12507245254	1.0341e+10	8363453630	6903101926	5783310820	4833971716	3.88424e+09	3105130518	2.46192e+09	1883755076	1397157552	950469870	532799330
90	303	305000000000	1161477783400	498902786200	337786090900	2.35108e+11	181266477600	143410142950	1.18571e+11	95896742750	79152108550	66312398500	55427119300	4.45374e+10	35603940150	2.82288e+10	21599447300	16020039600	10898244750	6109165250
90	304	243000000000	925374102840	397486482120	269121377340	1.87316e+11	144418865760	114257917170	9.44683e+10	76402978650	63062171730	52832501100	44159967180	3.54839e+10	28366417890	2.24905e+10	17208739980	12763506960	8682863850	4867302150
90	305	0	0	0	0	0	0	0	0	0	0	0	0	0	0	0	0	0	0	0
90	306	0	0	0	0	0	0	0	0	0	0	0	0	0	0	0	0	0	0	0
90	307	0	0	0	0	0	0	0	0	0	0	0	0	0	0	0	0	0	0	0
90	308	0	0	0	0	0	0	0	0	0	0	0	0	0	0	0	0	0	0	0
90	309	0	0	0	0	0	0	0	0	0	0	0	0	0	0	0	0	0	0	0
90	310	0	0	0	0	0	0	0	0	0	0	0	0	0	0	0	0	0	0	0
90	311	0	0	0	0	0	0	0	0	0	0	0	0	0	0	0	0	0	0	0
90	312	0	0	0	0	0	0	0	0	0	0	0	0	0	0	0	0	0	0	0
90	313	0	0	0	0	0	0	0	0	0	0	0	0	0	0	0	0	0	0	0
90	314	0	0	0	0	0	0	0	0	0	0	0	0	0	0	0	0	0	0	0
90	315	177000000000	684740895510	318480854220	225328779150	164369472930	131079297000	1.06974e+11	90584930790	74953239510	63037571190	53611682220	45450036990	37078034340	30007730400	2.40227e+10	18544819230	13853699730	9478831440	5334972930
90	316	342000000000	1323058679460	615369786120	435381030900	317595252780	253271862000	2.06696e+11	175028510340	144824903460	121801408740	103588674120	87818715540	71642303640	57981038400	4.64168e+10	35832362580	26768165580	18315030240	10308252780
90	317	271000000000	1.04839e+12	487617579060	344994910450	251661735390	200692031000	163785765920	138692182170	114758914730	96515151370	82083423060	69587344770	56769193820	45944039200	36780545470	28393480290	21211031790	14512787120	8168235390
90	318	397000000000	1535831274110	714332763420	505398448150	368670512730	294002717000	2.39937e+11	203176370190	168115458110	141389354590	120247671420	1.01942e+11	83163726740	67305474400	5.38815e+10	41594877030	31072987530	21260429840	11966012730
90	319	353000000000	1.37687e+12	668497823620	4.84374e+11	361903305990	293239288600	2.42797e+11	207876976860	173916629510	147592138120	1.2651e+11	108044983320	88834896290	72363422090	58194026800	45110660720	3.38124e+10	23196498380	13080086710
90	320	353000000001	1.37687e+12	6.68498e+11	4.84374e+11	3.61903e+11	2.93239e+11	2.42797e+11	2.07877e+11	1.73917e+11	1.47592e+11	1.2651e+11	1.08045e+11	8.88349e+10	7.23634e+10	5.8194e+10	4.51107e+10	3.38124e+10	2.31965e+10	1.30801e+10
90	321	353000000002	1.37687e+12	6.68498e+11	4.84374e+11	3.61903e+11	2.93239e+11	2.42797e+11	2.07877e+11	1.73917e+11	1.47592e+11	1.2651e+11	1.08045e+11	8.88349e+10	7.23634e+10	5.8194e+10	4.51107e+10	3.38124e+10	2.31965e+10	1.30801e+10
90	322	353000000003	1.37687e+12	6.68498e+11	4.84374e+11	3.61903e+11	2.93239e+11	2.42797e+11	2.07877e+11	1.73917e+11	1.47592e+11	1.2651e+11	1.08045e+11	8.88349e+10	7.23634e+10	5.8194e+10	4.51107e+10	3.38124e+10	2.31965e+10	1.30801e+10
90	323	353000000004	1.37687e+12	6.68498e+11	4.84374e+11	3.61903e+11	2.93239e+11	2.42797e+11	2.07877e+11	1.73917e+11	1.47592e+11	1.2651e+11	1.08045e+11	8.88349e+10	7.23634e+10	5.8194e+10	4.51107e+10	3.38124e+10	2.31965e+10	1.30801e+10
90	324	353000000005	1.37687e+12	6.68498e+11	4.84374e+11	3.61903e+11	2.93239e+11	2.42797e+11	2.07877e+11	1.73917e+11	1.47592e+11	1.2651e+11	1.08045e+11	8.88349e+10	7.23634e+10	5.8194e+10	4.51107e+10	3.38124e+10	2.31965e+10	1.30801e+10
90	325	353000000006	1.37687e+12	6.68498e+11	4.84374e+11	3.61903e+11	2.93239e+11	2.42797e+11	2.07877e+11	1.73917e+11	1.47592e+11	1.2651e+11	1.08045e+11	8.88349e+10	7.23634e+10	5.8194e+10	4.51107e+10	3.38124e+10	2.31965e+10	1.30801e+10
90	326	353000000007	1.37687e+12	6.68498e+11	4.84374e+11	3.61903e+11	2.93239e+11	2.42797e+11	2.07877e+11	1.73917e+11	1.47592e+11	1.2651e+11	1.08045e+11	8.88349e+10	7.23634e+10	5.8194e+10	4.51107e+10	3.38124e+10	2.31965e+10	1.30801e+10
90	327	353000000008	1.37687e+12	6.68498e+11	4.84374e+11	3.61903e+11	2.93239e+11	2.42797e+11	2.07877e+11	1.73917e+11	1.47592e+11	1.2651e+11	1.08045e+11	8.88349e+10	7.23634e+10	5.8194e+10	4.51107e+10	3.38124e+10	2.31965e+10	1.30801e+10
90	328	353000000009	1.37687e+12	6.68498e+11	4.84374e+11	3.61903e+11	2.93239e+11	2.42797e+11	2.07877e+11	1.73917e+11	1.47592e+11	1.2651e+11	1.08045e+11	8.88349e+10	7.23634e+10	5.8194e+10	4.51107e+10	3.38124e+10	2.31965e+10	1.30801e+10
90	329	353000000010	1.37687e+12	6.68498e+11	4.84374e+11	3.61903e+11	2.93239e+11	2.42797e+11	2.07877e+11	1.73917e+11	1.47592e+11	1.2651e+11	1.08045e+11	8.88349e+10	7.23634e+10	5.8194e+10	4.51107e+10	3.38124e+10	2.31965e+10	1.30801e+10
90	330	353000000011	1.37687e+12	6.68498e+11	4.84374e+11	3.61903e+11	2.93239e+11	2.42797e+11	2.07877e+11	1.73917e+11	1.47592e+11	1.2651e+11	1.08045e+11	8.88349e+10	7.23634e+10	5.8194e+10	4.51107e+10	3.38124e+10	2.31965e+10	1.30801e+10
90	331	353000000012	1.37687e+12	6.68498e+11	4.84374e+11	3.61903e+11	2.93239e+11	2.42797e+11	2.07877e+11	1.73917e+11	1.47592e+11	1.2651e+11	1.08045e+11	8.88349e+10	7.23634e+10	5.8194e+10	4.51107e+10	3.38124e+10	2.31965e+10	1.30801e+10
90	332	353000000013	1.37687e+12	6.68498e+11	4.84374e+11	3.61903e+11	2.93239e+11	2.42797e+11	2.07877e+11	1.73917e+11	1.47592e+11	1.2651e+11	1.08045e+11	8.88349e+10	7.23634e+10	5.8194e+10	4.51107e+10	3.38124e+10	2.31965e+10	1.30801e+10
90	333	353000000014	1.37687e+12	6.68498e+11	4.84374e+11	3.61903e+11	2.93239e+11	2.42797e+11	2.07877e+11	1.73917e+11	1.47592e+11	1.2651e+11	1.08045e+11	8.88349e+10	7.23634e+10	5.8194e+10	4.51107e+10	3.38124e+10	2.31965e+10	1.30801e+10
90	334	353000000015	1.40666e+12	7.50512e+11	5.77936e+11	4.5803e+11	3.86976e+11	3.32568e+11	2.92875e+11	2.51993e+11	2.1877e+11	1.90734e+11	1.65469e+11	1.38404e+11	1.14304e+11	9.29181e+10	7.27366e+10	5.49497e+10	3.79336e+10	2.14835e+10
90	335	353000000016	1.40666e+12	7.50512e+11	5.77936e+11	4.5803e+11	3.86976e+11	3.32568e+11	2.92875e+11	2.51993e+11	2.1877e+11	1.90734e+11	1.65469e+11	1.38404e+11	1.14304e+11	9.29181e+10	7.27366e+10	5.49497e+10	3.79336e+10	2.14835e+10
90	336	353000000017	1.40666e+12	7.50512e+11	5.77936e+11	4.5803e+11	3.86976e+11	3.32568e+11	2.92875e+11	2.51993e+11	2.1877e+11	1.90734e+11	1.65469e+11	1.38404e+11	1.14304e+11	9.29181e+10	7.27366e+10	5.49497e+10	3.79336e+10	2.14835e+10
90	337	353000000018	1.40666e+12	7.50512e+11	5.77936e+11	4.5803e+11	3.86976e+11	3.32568e+11	2.92875e+11	2.51993e+11	2.1877e+11	1.90734e+11	1.65469e+11	1.38404e+11	1.14304e+11	9.29181e+10	7.27366e+10	5.49497e+10	3.79336e+10	2.14835e+10
90	338	353000000019	1.40666e+12	7.50512e+11	5.77936e+11	4.5803e+11	3.86976e+11	3.32568e+11	2.92875e+11	2.51993e+11	2.1877e+11	1.90734e+11	1.65469e+11	1.38404e+11	1.14304e+11	9.29181e+10	7.27366e+10	5.49497e+10	3.79336e+10	2.14835e+10
90	339	353000000020	1.40666e+12	7.50512e+11	5.77936e+11	4.5803e+11	3.86976e+11	3.32568e+11	2.92875e+11	2.51993e+11	2.1877e+11	1.90734e+11	1.65469e+11	1.38404e+11	1.14304e+11	9.29181e+10	7.27366e+10	5.49497e+10	3.79336e+10	2.14835e+10
90	340	353000000021	1.40666e+12	7.50512e+11	5.77936e+11	4.5803e+11	3.86976e+11	3.32568e+11	2.92875e+11	2.51993e+11	2.1877e+11	1.90734e+11	1.65469e+11	1.38404e+11	1.14304e+11	9.29181e+10	7.27366e+10	5.49497e+10	3.79336e+10	2.14835e+10
90	341	353000000022	1.40666e+12	7.50512e+11	5.77936e+11	4.5803e+11	3.86976e+11	3.32568e+11	2.92875e+11	2.51993e+11	2.1877e+11	1.90734e+11	1.65469e+11	1.38404e+11	1.14304e+11	9.29181e+10	7.27366e+10	5.49497e+10	3.79336e+10	2.14835e+10
90	342	353000000023	1.40666e+12	7.50512e+11	5.77936e+11	4.5803e+11	3.86976e+11	3.32568e+11	2.92875e+11	2.51993e+11	2.1877e+11	1.90734e+11	1.65469e+11	1.38404e+11	1.14304e+11	9.29181e+10	7.27366e+10	5.49497e+10	3.79336e+10	2.14835e+10
90	343	353000000024	1.40666e+12	7.50512e+11	5.77936e+11	4.5803e+11	3.86976e+11	3.32568e+11	2.92875e+11	2.51993e+11	2.1877e+11	1.90734e+11	1.65469e+11	1.38404e+11	1.14304e+11	9.29181e+10	7.27366e+10	5.49497e+10	3.79336e+10	2.14835e+10
90	344	353000000024	1.40666e+12	7.50512e+11	5.77936e+11	4.5803e+11	3.86976e+11	3.32568e+11	2.92875e+11	2.51993e+11	2.1877e+11	1.90734e+11	1.65469e+11	1.38404e+11	1.14304e+11	9.29181e+10	7.27366e+10	5.49497e+10	3.79336e+10	2.14835e+10
90	345	546000000000	2.17574e+12	1160848880100	893918079600	708454841640	5.98553e+11	5.14397e+11	453002408040	389768815800	338380098420	2.95017e+11	2.55938e+11	214074981120	1.768e+11	1.4372e+11	112504806960	84993029940	58673503980	33229434420
90	346	547000000000	2.17972e+12	1162974976950	895555292200	709752377980	5.99649e+11	5.15339e+11	453832082780	390482678100	338999842190	2.95557e+11	2.56407e+11	214467059840	1.77123e+11	1.43984e+11	112710859720	85148694830	58780964610	33290294190
90	347	549000000000	2.18769e+12	1167227170650	898829717400	712347450660	6.01842e+11	5.17224e+11	455491432260	391910402700	340239329730	2.96638e+11	2.57345e+11	215251217280	1.77771e+11	1.4451e+11	113122965240	85460024610	58995885870	33412013730
90	348	551000000000	2.19566e+12	1171479364350	902104142600	714942523340	6.04034e+11	5.19108e+11	457150781740	393338127300	341478817270	2.97719e+11	2.58282e+11	216035374720	1.78419e+11	1.45037e+11	113535070760	85771354390	59210807130	33533733270
90	349	552000000000	2199647649360	1173605461200	903741355200	716240059680	6.0513e+11	5.2005e+11	457980456480	394051989600	342098561040	2.98259e+11	2.58751e+11	216427453440	1.78742e+11	1.453e+11	113741123520	85927019280	59318267760	33594593040
90	350	0	0	0	0	0	0	0	0	0	0	0	0	0	0	0	0	0	0	0
89	280	0	0	0	0	0	0	0	0	0	0	0	0	0	0	0	0	0	0	0
89	281	0	0	0	0	0	0	0	0	0	0	0	0	0	0	0	0	0	0	0
89	282	0	0	0	0	0	0	0	0	0	0	0	0	0	0	0	0	0	0	0
89	283	0	0	0	0	0	0	0	0	0	0	0	0	0	0	0	0	0	0	0
89	284	0	0	0	0	0	0	0	0	0	0	0	0	0	0	0	0	0	0	0
89	285	0	0	0	0	0	0	0	0	0	0	0	0	0	0	0	0	0	0	0
89	286	0	0	0	0	0	0	0	0	0	0	0	0	0	0	0	0	0	0	0
89	287	0	0	0	0	0	0	0	0	0	0	0	0	0	0	0	0	0	0	0
89	288	0	0	0	0	0	0	0	0	0	0	0	0	0	0	0	0	0	0	0
89	289	0	0	0	0	0	0	0	0	0	0	0	0	0	0	0	0	0	0	0
89	290	0	0	0	0	0	0	0	0	0	0	0	0	0	0	0	0	0	0	0
89	291	94922809458	3.57446e+11	1.45137e+11	9.49385e+10	6.37721e+10	4.79059e+10	3.69932e+10	3.0018e+10	2.38364e+10	1.93758e+10	1.60352e+10	1.32514e+10	1.05268e+10	8.33082e+09	6.54897e+09	4.97021e+09	3.66721e+09	2.5097e+09	1.42312e+09
89	292	0	0	0	0	0	0	0	0	0	0	0	0	0	0	0	0	0	0	0
89	293	0	0	0	0	0	0	0	0	0	0	0	0	0	0	0	0	0	0	0
89	294	132000000000	497065373640	201827883840	1.32022e+11	88681710480	6.66182e+10	51442875000	41743178400	3.3147e+10	26944069680	22298555400	18427452120	14638538640	1.15849e+10	9.10702e+09	6.9116e+09	5099628600	3490004760	1978992840
89	295	0	0	0	0	0	0	0	0	0	0	0	0	0	0	0	0	0	0	0
89	296	160000000000	602503483200	244639859200	1.60026e+11	107492982400	80749281600	62355000000	50597792000	40178168000	32659478400	27028552000	22336305600	17743683200	1.40423e+10	1.10388e+10	8.37769e+09	6181368000	4230308800	2398779200
89	297	0	0	0	0	0	0	0	0	0	0	0	0	0	0	0	0	0	0	0
89	298	282000000000	1073890934160	461280608880	312313697160	2.17379e+11	167597202240	132595607580	1.0963e+11	88665185100	73183261020	61311791400	51247369320	4.11788e+10	32919052860	2.61001e+10	19970636520	14811971040	10076409900	5648474100
89	299	72100000000	274565731748	117937347164	79850416898	5.5578e+10	42850206672	33901217399	2.80295e+10	22669361155	18711039431	15675816170	13102607546	1.05283e+10	8416537983	6.67311e+09	5105967706	3787032312	2576273595	1444166605
89	300	168000000000	639764811840	274805469120	186059223840	1.29502e+11	99845141760	78993127920	6.53114e+10	52821812400	43598538480	36526173600	30530347680	2.45321e+10	19611350640	1.5549e+10	11897400480	8824152960	6002967600	3365048400
89	301	466000000000	1774585728080	762258027440	516092847080	359214319880	276951405120	219111890540	1.81161e+11	146517646300	120934041260	101316648200	84685369160	6.80473e+10	54398151180	4.31299e+10	33001122760	24476519520	16651088700	9334003300
89	302	176000000000	670229802880	287891443840	194919186880	1.35669e+11	104599672320	82754705440	6.84215e+10	55337136800	45674659360	38265515200	31984173760	2.57003e+10	20545224480	1.62894e+10	12463943360	9244350720	6288823200	3525288800
89	303	395000000000	1504208932600	646120001800	437460675100	304484241100	234754946400	185727890050	153559583800	124194142250	102508468450	85879991500	71782662700	5.76796e+10	46110020850	3.65586e+10	27973054700	20747264400	14114120250	7911869750
89	304	243000000000	925374102840	397486482120	269121377340	1.87316e+11	144418865760	114257917170	9.44683e+10	76402978650	63062171730	52832501100	44159967180	3.54839e+10	28366417890	2.24905e+10	17208739980	12763506960	8682863850	4867302150
89	305	9463675346	3.60388e+10	1.54802e+10	1.0481e+10	7.29504e+09	5.62442e+09	4.44979e+09	3.67908e+09	2.97553e+09	2.45597e+09	2.05757e+09	1.71982e+09	1.38193e+09	1.10473e+09	8.75896e+08	6.70197e+08	4.97077e+08	3.38156e+08	1.89558e+08
89	306	0	0	0	0	0	0	0	0	0	0	0	0	0	0	0	0	0	0	0
89	307	0	0	0	0	0	0	0	0	0	0	0	0	0	0	0	0	0	0	0
89	308	0	0	0	0	0	0	0	0	0	0	0	0	0	0	0	0	0	0	0
89	309	0	0	0	0	0	0	0	0	0	0	0	0	0	0	0	0	0	0	0
89	310	0	0	0	0	0	0	0	0	0	0	0	0	0	0	0	0	0	0	0
89	311	0	0	0	0	0	0	0	0	0	0	0	0	0	0	0	0	0	0	0
89	312	32464263620	1.25591e+11	5.84138e+10	4.13284e+10	3.01476e+10	2.40418e+10	1.96206e+10	1.66145e+10	1.37475e+10	1.1562e+10	9.83313e+09	8.33617e+09	6.80063e+09	5.50384e+09	4.4061e+09	3.40138e+09	2.54096e+09	1.73855e+09	9.78508e+08
89	313	0	0	0	0	0	0	0	0	0	0	0	0	0	0	0	0	0	0	0
89	314	0	0	0	0	0	0	0	0	0	0	0	0	0	0	0	0	0	0	0
89	315	207000000000	800798674410	372460660020	2.6352e+11	192228705630	153296127000	1.25106e+11	105938308890	87657178410	73721905290	62698408020	5.31534e+10	43362446940	35093786400	2.80944e+10	21688008930	16201784430	11085413040	6239205630
89	316	496000000000	1918821944480	892466122560	631429799200	460605980640	367318256000	299770257920	253842517920	210038456480	176647657120	150233866560	1.27363e+11	103902288320	84089459200	6.73179e+10	51967403040	38821667040	26562149120	14949980640
89	317	340000000000	1315321494200	611771132400	432834943000	315737970600	251790740000	2.05488e+11	174004951800	143977974200	121089119800	102982892400	87305155800	71223342800	57641968000	4.61453e+10	35622816600	26611626600	18207924800	10247970600
89	318	452000000000	1748603868760	813295740720	575415865400	419745772680	334733572000	2.73178e+11	231324230040	191406012760	160977300440	136906668720	1.16065e+11	94685149840	76629910400	6.13461e+10	47357391480	35377809480	24205829440	13623772680
89	319	582000000000	2.27008e+12	1102169216280	7.986e+11	596679105060	4.83471e+11	4.00305e+11	342732012840	286740731940	243338879280	2.08581e+11	178136488080	146464333260	1.19307e+11	95945959200	74375083680	5.57473e+10	38244651720	21565468740
89	320	571000000000	2.22717e+12	1081337839340	7.83506e+11	585401664930	4.74333e+11	3.92739e+11	336254260020	281321233570	238739690840	2.04638e+11	174769647240	143696107030	1.17052e+11	94132547600	72969369040	5.46937e+10	37521814660	21157873970
89	321	132000000000	5.14863e+11	249976523280	1.81126e+11	135329281560	1.09653e+11	90790844760	77733033840	6.5034e+10	55190261280	4.7307e+10	40402090080	33218714760	2.70594e+10	21760939200	16868575680	1.26437e+10	8674044720	4891137240
89	322	449000000000	1.75131e+12	850298931460	6.16102e+11	460324601670	372987083800	308826434070	264410092380	2.21214e+11	187730509960	1.60915e+11	137428321560	112993961570	9.2043e+10	74020164400	57378715760	43007797260	29504894540	16637277430
89	323	495000000000	1.93074e+12	937411962300	6.79222e+11	507484805850	411199569000	340465667850	291498876900	2.43877e+11	206963479800	1.77401e+11	151507837800	124570180350	1.01473e+11	81603522000	63257158800	4.74139e+10	32527667700	18341764650
89	324	807000000000	3.14768e+12	1528265562780	1.10734e+12	827354016810	670379903400	555062210010	475231502340	3.97594e+11	337413188280	2.89218e+11	247003687080	203087142510	165431392710	133038469200	103128337680	77299092180	53029955220	29902634490
89	325	515000000000	2.00874e+12	975287193100	7.06665e+11	527989242450	4.27814e+11	354221856450	303276609300	2.53731e+11	215325640600	1.84569e+11	157629366600	129603318950	1.05573e+11	84900634000	65813003600	4.93297e+10	33841916900	19082846050
89	326	809000000000	3.15548e+12	1532053085860	1.11008e+12	829404460470	672041315800	556437828870	476409275580	3.98579e+11	338249404360	2.89934e+11	247615839960	203590456370	165841383770	133368180400	103383922160	77490663660	53161380140	29976742630
89	327	534000000000	2.08285e+12	1011268662360	7.32736e+11	547468457220	4.43597e+11	367290235620	314465455080	2.63092e+11	223269693360	1.91378e+11	163444818960	134384800620	1.09468e+11	88032890400	68241056160	5.11496e+10	35090453640	19786873380
89	328	765000000000	2.98386e+12	1448727578100	1.04971e+12	784294699950	635490243000	5.26174e+11	450498264300	376901477550	319852650600	2.74165e+11	234148476600	192517551450	156821580450	126114534000	97761063600	73276091100	50270031900	28346363550
89	329	940000000000	3.66645e+12	1780135847600	1.28983e+12	963708520200	780863828000	646540864200	553553422800	4.63121e+11	393021557600	3.36883e+11	287711853600	236557514200	1.92696e+11	154964264000	120124705600	90038595600	61769712400	34830825800
89	330	455000000000	1.77472e+12	861661500700	6.24335e+11	466475932650	377971321000	312953290650	267943412100	2.2417e+11	190239158200	1.63066e+11	139264780200	114503903150	9.3273e+10	75009298000	58145469200	43582511700	29899169300	16859601850
89	331	587000000000	2.28958e+12	1111638023980	8.05461e+11	601805214210	4.87625e+11	4.03744e+11	345676445940	289204140290	245429419480	2.10373e+11	179666870280	147722617910	1.20332e+11	96770237200	75014044880	5.62262e+10	38573214020	21750739090
89	332	909000000000	3.54553e+12	1721429239860	1.2473e+12	931926643470	755111935800	625218771870	535297937580	4.47848e+11	380060208360	3.25773e+11	278223483960	228756149370	1.86341e+11	149853740400	116163146160	87069237660	59732626140	33682149630
89	333	1120000000000	4.36853e+12	2121012924800	1.53682e+12	1148248449600	9.30391e+11	7.70347e+11	659553014400	551803470400	468281004800	4.01392e+11	342805612800	281855761600	2.29595e+11	184638272000	143127308800	1.0728e+11	73597955200	41500558400
89	334	970000000000	3865322862100	2.06231e+12	1588096222000	1258610249800	1.06336e+12	9.13856e+11	804784497800	692446431000	601151456900	5.24114e+11	454688887100	380316358400	314094400200	2.55327e+11	199871177200	150994943300	104236811100	59033976900
89	335	950000000000	3785625483500	2.01979e+12	1555351970000	1232659523000	1.04144e+12	8.95014e+11	788191003000	678169185000	588756581500	5.13308e+11	445313858500	372474784000	307618227000	2.50063e+11	195750122000	147881645500	102087598500	57816781500
89	336	867000000000	3454881362310	1.84333e+12	1419463324200	1124964006780	9.50449e+11	8.16818e+11	719327999580	618918614100	537317848590	4.68461e+11	406407489810	339932250240	280742108220	2.28215e+11	178647742920	134961459630	93168366210	52765420590
89	337	870000000000	3466835969100	1.8497e+12	1424374962000	1128856615800	9.53738e+11	8.19644e+11	721817023800	621060201000	539177079900	4.70082e+11	407813744100	341108486400	281713534200	2.29005e+11	179265901200	135428454300	93490748100	52947999900
89	338	1230000000000	4901388783900	2615099125500	2013771498000	1595969698200	1.34839e+12	1158807046500	1020499930200	8.78051e+11	762284837100	6.64599e+11	576564258900	482256825600	3.98285e+11	3.23766e+11	253444894800	191467814700	132176574900	74857517100
89	339	1130000000000	4502901890900	2402489440500	1850050238000	1466216064200	1.23876e+12	1.0646e+12	937532456200	806664399000	700310460100	6.10566e+11	5.29689e+11	443048953600	3.65904e+11	2.97443e+11	232839618800	175901325700	121430511900	68771540100
89	340	1200000000000	4781842716000	2551316220000	1964655120000	1557043608000	1.3155e+12	1130543460000	995609688000	856634760000	743692524000	6.48389e+11	562501716000	470494464000	3.8857e+11	3.15869e+11	247263312000	186797868000	128952756000	73031724000
89	341	1510000000000	6017152084300	3210406243500	2472191026000	1959279873400	1.65534e+12	1.4226e+12	1252808857400	1.07793e+12	935813092700	8.15889e+11	707814659300	592038867200	4.88951e+11	3.97469e+11	311139667600	235053983900	162265551300	91898252700
89	342	1270000000000	5060783541100	2700142999500	2079260002000	1647871151800	1.39224e+12	1196491828500	1053686919800	9.06605e+11	787074587900	6.86212e+11	595314316100	497939974400	4.11237e+11	3.34295e+11	261687005200	197694410300	136475000100	77291907900
89	343	1180000000000	4702145337400	2508794283000	1931910868000	1531092881200	1.29358e+12	1111701069000	979016193200	842357514000	731297648600	6.37582e+11	553126687400	462652889600	3.82094e+11	3.10605e+11	243142256800	183684570200	126803543400	71814528600
89	344	1300000000000	5180329609000	2763925905000	2128376380000	1686797242000	1.42513e+12	1224755415000	1078577162000	9.28021e+11	805666901000	7.02421e+11	609376859000	509702336000	4.20951e+11	3.42191e+11	267868588000	202364357000	139698819000	79117701000
89	345	1150000000000	4582599269500	2445011377500	1882794490000	1492166791000	1.26069e+12	1.08344e+12	954125951000	820941645000	712705335500	6.21373e+11	5.39064e+11	450890528000	3.7238e+11	3.02708e+11	236960674000	179014623500	123579724500	69988735500
89	346	1150000000000	4582599269500	2445011377500	1882794490000	1492166791000	1.26069e+12	1.08344e+12	954125951000	820941645000	712705335500	6.21373e+11	5.39064e+11	450890528000	3.7238e+11	3.02708e+11	236960674000	179014623500	123579724500	69988735500
89	347	1150000000000	4582599269500	2445011377500	1882794490000	1492166791000	1.26069e+12	1.08344e+12	954125951000	820941645000	712705335500	6.21373e+11	5.39064e+11	450890528000	3.7238e+11	3.02708e+11	236960674000	179014623500	123579724500	69988735500
89	348	1160000000000	4622447958800	2466272346000	1899166616000	1505142154400	1.27165e+12	1.09286e+12	962422698400	828080268000	718902773200	6.26776e+11	5.43752e+11	454811315200	3.75618e+11	3.0534e+11	239021201600	180571272400	124654330800	70597333200
89	349	1160000000000	4622447958800	2466272346000	1899166616000	1505142154400	1.27165e+12	1.09286e+12	962422698400	828080268000	718902773200	6.26776e+11	5.43752e+11	454811315200	3.75618e+11	3.0534e+11	239021201600	180571272400	124654330800	70597333200
89	350	0	0	0	0	0	0	0	0	0	0	0	0	0	0	0	0	0	0	0
88	280	0	0	0	0	0	0	0	0	0	0	0	0	0	0	0	0	0	0	0
88	281	0	0	0	0	0	0	0	0	0	0	0	0	0	0	0	0	0	0	0
88	282	0	0	0	0	0	0	0	0	0	0	0	0	0	0	0	0	0	0	0
88	283	0	0	0	0	0	0	0	0	0	0	0	0	0	0	0	0	0	0	0
88	284	0	0	0	0	0	0	0	0	0	0	0	0	0	0	0	0	0	0	0
88	285	0	0	0	0	0	0	0	0	0	0	0	0	0	0	0	0	0	0	0
88	286	0	0	0	0	0	0	0	0	0	0	0	0	0	0	0	0	0	0	0
88	287	0	0	0	0	0	0	0	0	0	0	0	0	0	0	0	0	0	0	0
88	288	0	0	0	0	0	0	0	0	0	0	0	0	0	0	0	0	0	0	0
88	289	0	0	0	0	0	0	0	0	0	0	0	0	0	0	0	0	0	0	0
88	290	0	0	0	0	0	0	0	0	0	0	0	0	0	0	0	0	0	0	0
88	291	219000000000	824676642630	334850807280	2.19036e+11	147131019660	1.10526e+11	85348406250	69255727800	5.49939e+10	44702661060	36995330550	30572818290	24286666380	19220357610	1.51094e+10	11466967020	8.46075e+09	5790235170	3283329030
88	292	0	0	0	0	0	0	0	0	0	0	0	0	0	0	0	0	0	0	0
88	293	0	0	0	0	0	0	0	0	0	0	0	0	0	0	0	0	0	0	0
88	294	80356996137	3.02596e+11	1.22866e+11	8.03703e+10	5.39863e+10	4.05548e+10	3.13166e+10	2.54118e+10	2.01787e+10	1.64026e+10	1.35746e+10	1.1218e+10	8.91143e+09	7.05247e+09	5.54404e+09	4.20754e+09	3.10448e+09	2.12459e+09	1.20474e+09
88	295	0	0	0	0	0	0	0	0	0	0	0	0	0	0	0	0	0	0	0
88	296	188000000000	707941592760	287451834560	1.88031e+11	126304254320	9.48804e+10	73267125000	5.94524e+10	47209347400	38374887120	31758548600	26245159080	20848827760	1.64997e+10	1.29706e+10	9843789040	7.26311e+09	4970612840	2818565560
88	297	0	0	0	0	0	0	0	0	0	0	0	0	0	0	0	0	0	0	0
88	298	180000000000	685462298400	294434431200	199349168400	138752312400	106976937600	84635494200	69976519200	56594799000	46712719800	39135186000	32711086800	2.62844e+10	21012161400	1.66596e+10	12747214800	9454449600	6431751000	3605409000
88	299	29461100392	1.12192e+11	4.81909e+10	3.2628e+10	2.271e+10	1.75092e+10	1.38525e+10	1.14533e+10	9.26303e+09	7.6456e+09	6.40536e+09	5.35391e+09	4.30203e+09	3.43912e+09	2.72673e+09	2.08637e+09	1.54744e+09	1.0527e+09	5.90107e+08
88	300	109000000000	415085502920	178296405560	120716996420	84022233620	64780478880	51251493710	4.23747e+10	34271294950	28287146990	23698529300	19808380340	1.59166e+10	12724031070	1.00883e+10	7719146740	5725194480	3894782550	2183275450
88	301	284000000000	1081507181920	464552102560	314528687920	2.1892e+11	168785834880	133536001960	1.10407e+11	89294016200	73702291240	61746626800	51610825840	4.14709e+10	33152521320	2.62852e+10	20112272240	14917020480	10147873800	5688534200
88	302	0	0	0	0	0	0	0	0	0	0	0	0	0	0	0	0	0	0	0
88	303	198000000000	754008528240	323877874320	219284085240	152627543640	117674631360	93099043620	76974171120	62254278900	51383991780	43048704600	35982195480	2.89128e+10	23113377540	1.83256e+10	14021936280	10399894560	7074926100	3965949900
88	304	0	0	0	0	0	0	0	0	0	0	0	0	0	0	0	0	0	0	0
88	305	0	0	0	0	0	0	0	0	0	0	0	0	0	0	0	0	0	0	0
88	306	0	0	0	0	0	0	0	0	0	0	0	0	0	0	0	0	0	0	0
88	307	0	0	0	0	0	0	0	0	0	0	0	0	0	0	0	0	0	0	0
88	308	0	0	0	0	0	0	0	0	0	0	0	0	0	0	0	0	0	0	0
88	309	39459367768	1.51846e+11	6.89452e+10	4.80474e+10	3.45733e+10	2.72304e+10	2.19723e+10	1.84448e+10	1.5146e+10	1.26587e+10	1.0712e+10	9.03851e+09	7.34183e+09	5.92211e+09	4.72591e+09	3.63765e+09	2.71107e+09	1.85146e+09	1.04068e+09
88	310	0	0	0	0	0	0	0	0	0	0	0	0	0	0	0	0	0	0	0
88	311	0	0	0	0	0	0	0	0	0	0	0	0	0	0	0	0	0	0	0
88	312	0	0	0	0	0	0	0	0	0	0	0	0	0	0	0	0	0	0	0
88	313	0	0	0	0	0	0	0	0	0	0	0	0	0	0	0	0	0	0	0
88	314	0	0	0	0	0	0	0	0	0	0	0	0	0	0	0	0	0	0	0
88	315	170000000000	657660747100	305885566200	216417471500	157868985300	125895370000	1.02744e+11	87002475900	71988987100	60544559900	51491446200	43652577900	35611671400	28820984000	2.30727e+10	17811408300	13305813300	9103962400	5123985300
88	316	399000000000	1543568459370	717931417140	507944536050	370527794910	295483839000	2.41146e+11	204199928730	168962387370	142101643530	120853453140	1.02455e+11	83582687580	67644544800	5.41529e+10	41804423010	31229526510	21367535280	12026294910
88	317	287000000000	1110286084810	516406808820	365363613650	266519992830	212541007000	1.73456e+11	146880650490	121534348810	102213462890	86929676820	73695822690	60120880540	48656602400	3.89521e+10	30069848130	22463343630	15369630640	8650492830
88	318	472000000000	1825975721360	849282277920	600876744400	438318594480	349544792000	285265245440	241559815440	199875305360	168100189840	142964485920	1.212e+11	98874758240	80020614400	6.40606e+10	49452851280	36943199280	25276883840	14226594480
88	319	554000000000	2.16086e+12	1049143893160	7.60179e+11	567972893820	4.60211e+11	3.81046e+11	326243187480	2.72946e+11	231631854160	1.98546e+11	169566347760	139417939220	1.13568e+11	91330002400	70796900960	5.30653e+10	36404702840	20527954780
88	320	666000000000	2.59772e+12	1261245185640	9.13862e+11	682797738780	553250329200	4.58081e+11	392198488920	328125992220	278459954640	2.38685e+11	203846909040	167603515380	1.36527e+11	109793829600	85109631840	6.37933e+10	43764498360	24678010620
88	321	243000000000	9.47816e+11	460184054220	3.33436e+11	249128904690	201861606600	167137691490	143099448660	1.19722e+11	101600253720	8.70878e+10	74376574920	61152633990	4.98139e+10	40059910800	31053514320	2.32759e+10	15968127780	9004139010
88	322	499000000000	1.94634e+12	944987008460	6.8471e+11	511585693170	4.14522e+11	343216905570	293854423380	2.45848e+11	208635911960	1.78835e+11	152732143560	125576808070	1.02293e+11	82262944400	63768327760	4.77971e+10	32790517540	18489980930
88	323	734000000000	2.86295e+12	1390020970360	1.00717e+12	752512823220	609738350800	5.04852e+11	432242779080	361628345780	306891301360	2.63055e+11	224660106960	184716186620	150466719020	121004010400	93799504160	70306733160	48232945640	27197687380
88	324	947000000000	3.69375e+12	1793392178380	1.29944e+12	970885073010	786678771400	651355530210	557675629140	4.6657e+11	395948313880	3.39392e+11	289854388680	238319112710	1.94131e+11	156118253200	121019251280	9.07091e+10	62229699620	35090204290
88	325	822000000000	3.20619e+12	1556671985880	1.12792e+12	842732344260	682840496400	565379351460	484064801640	4.04984e+11	343684808880	2.94593e+11	251594833680	206861996460	1.68506e+11	135511303200	105045221280	78735878280	54015642120	30458445540
88	326	1210000000000	4.71958e+12	2291451463400	1.66032e+12	1240518414300	1.00515e+12	8.32249e+11	712552810200	596144820700	505910728400	4.33647e+11	370352492400	304504885300	2.48045e+11	199475276000	154628610400	1.15901e+11	79512076600	44835424700
88	327	1020000000000	3.97849e+12	1931636770800	1.39961e+12	1045726266600	8.4732e+11	701565618600	600664352400	5.02535e+11	426470200800	3.65554e+11	312197968800	256690068600	2.09095e+11	168152712000	130348084800	9.77015e+10	67026709200	37795151400
88	328	1280000000000	4.99261e+12	2424014771200	1.75637e+12	1312283942400	1.0633e+12	8.80396e+11	753774873600	630632537600	535178291200	4.58734e+11	391777843200	322120870400	2.62394e+11	211015168000	163574067200	1.22606e+11	84111948800	47429209600
88	329	1520000000000	5.92872e+12	2878517540800	2.08569e+12	1558337181600	1262673424000	1.04547e+12	895107662400	748876138400	635524220800	5.44747e+11	465236188800	382518533600	311593205600	250580512000	194244204800	145594324800	99882939200	56322186400
88	330	1030000000000	4.01749e+12	1950574386200	1.41333e+12	1055978484900	8.55627e+11	708443712900	606553218600	5.07462e+11	430651281200	3.69138e+11	315258733200	259206637900	2.11145e+11	169801268000	131626007200	9.86593e+10	67683833800	38165692100
88	331	1230000000000	4.79759e+12	2329326694200	1.68776e+12	1261022850900	1.02177e+12	8.46006e+11	724330542600	605998454100	514272889200	4.40815e+11	376474021200	309538023900	2.52145e+11	202772388000	157184455200	1.17816e+11	80826325800	45576506100
88	332	1590000000000	6.20176e+12	3011080848600	2.18174e+12	1630102709700	1320822858000	1.09362e+12	936329725800	7.83364e+11	664791783600	5.69834e+11	486661539600	400134518700	325942892700	262120404000	203189661600	152299326600	104482811400	58915971300
88	333	1700000000000	6.63081e+12	3219394618000	2.33268e+12	1742877111000	1412200540000	1169276031000	1001107254000	8.37559e+11	710783668000	6.09256e+11	520329948000	427816781000	3.48492e+11	280254520000	217246808000	162835758000	111711182000	62991919000
88	334	1730000000000	6893823248900	3.67815e+12	2832377798000	2244737868200	1.89651e+12	1.62987e+12	1435337300200	1234981779000	1072156722100	9.34761e+11	810939973900	678296185600	560188981800	4.55378e+11	356471274800	269300259700	185906889900	105287402100
88	335	1660000000000	6614882423800	3.52932e+12	2717772916000	2153910324400	1.81978e+12	1.56392e+12	1377260068400	1185011418000	1028774658200	8.96938e+11	778127373800	650850675200	5.37522e+11	4.36952e+11	342047581600	258403717400	178384645800	101027218200
88	336	1470000000000	5857757327100	3125362369500	2406702522000	1907378419800	1.61149e+12	1.38492e+12	1219621867800	1.04938e+12	911023341900	7.94276e+11	689064602100	576355718400	4.75999e+11	3.8694e+11	302897557200	228827388300	157967126100	89463861900
88	337	1570000000000	6256244220100	3337972054500	2570423782000	2037132053800	1.72111e+12	1.47913e+12	1302589341800	1120763811000	972997718900	8.48309e+11	735939745100	615563590400	5.0838e+11	4.13262e+11	323502833200	244393877300	168713189100	95549838900
88	338	2070000000000	8.24868e+12	4401020479500	3389030082000	2685900223800	2.26924e+12	1.95019e+12	1717426711800	1477694961000	1282869603900	1.11847e+12	9.70315e+11	811602950400	6.70284e+11	5.44874e+11	426529213200	322226322300	222443504100	125979723900
88	339	1980000000000	7890040481400	4.20967e+12	3241680948000	2569121953200	2.17058e+12	1.8654e+12	1642755985200	1413447354000	1227092664600	1.06984e+12	9.28128e+11	776315865600	641141146800	5.21184e+11	407984464800	308216482200	212772047400	120502344600
88	340	2130000000000	8.48777e+12	4528586290500	3487262838000	2763752404200	2.33501e+12	2.00671e+12	1767207196200	1520526699000	1320054230100	1.15089e+12	9.98441e+11	835127673600	6.89712e+11	5.60668e+11	438892378800	331566215700	228891141900	129631310100
88	341	2420000000000	9643382810600	5145154377000	3962054492000	3140037942800	2.65293e+12	2279929311000	2007812870800	1727546766000	1499779923400	1.30758e+12	1134378460600	948830502400	7.83617e+11	6.37003e+11	498647679200	376709033800	260054724600	147280643400
88	342	2230000000000	8886257713900	4741195975500	3650984098000	2893506038200	2.44464e+12	2.10093e+12	1850174670200	1591912929000	1382028607100	1.20492e+12	1.04532e+12	874335545600	7.22093e+11	5.8699e+11	459497654800	347132704700	239637204900	135717287100
88	343	2090000000000	8.32838e+12	4443542416500	3421774334000	2711850950600	2.29116e+12	1.96903e+12	1734020206600	1491972207000	1295264479300	1.12928e+12	9.7969e+11	819444524800	6.7676e+11	5.50139e+11	430650268400	325339620100	224592716700	127196919300
88	344	2220000000000	8846409024600	4719935007000	3634611972000	2880530674800	2.43368e+12	2.09151e+12	1841877922800	1584774306000	1375831169400	1.19952e+12	1.04063e+12	870414758400	7.18855e+11	5.84358e+11	457437127200	345576055800	238562598600	135108689400
88	345	2170000000000	8.64717e+12	4613630164500	3552751342000	2815653857800	2.37886e+12	2.0444e+12	1800394185800	1549081191000	1344843980900	1.1725e+12	1.01719e+12	850810822400	7.02665e+11	5.71196e+11	447134489200	337792811300	233189567100	132065700900
88	346	2180000000000	8.68701e+12	4634891133000	3569123468000	2828629221200	2.38983e+12	2.05382e+12	1808690933200	1556219814000	1351041418600	1.17791e+12	1.02188e+12	854731609600	7.05903e+11	5.73829e+11	449195016800	339349460200	234264173400	132674298600
88	347	2190000000000	8.72686e+12	4656152101500	3585495594000	2841604584600	2.40079e+12	2.06324e+12	1816987680600	1563358437000	1357238856300	1.18331e+12	1.02657e+12	858652396800	7.09141e+11	5.76461e+11	451255544400	340906109100	235338779700	133282896300
88	348	2190000000000	8.72686e+12	4656152101500	3585495594000	2841604584600	2.40079e+12	2.06324e+12	1816987680600	1563358437000	1357238856300	1.18331e+12	1.02657e+12	858652396800	7.09141e+11	5.76461e+11	451255544400	340906109100	235338779700	133282896300
88	349	2200000000000	8.76671e+12	4677413070000	3601867720000	2854579948000	2.41175e+12	2.07266e+12	1825284428000	1570497060000	1363436294000	1.18871e+12	1.03125e+12	862573184000	7.12379e+11	5.79093e+11	453316072000	342462758000	236413386000	133891494000
88	350	0	0	0	0	0	0	0	0	0	0	0	0	0	0	0	0	0	0	0
87	280	0	0	0	0	0	0	0	0	0	0	0	0	0	0	0	0	0	0	0
87	281	0	0	0	0	0	0	0	0	0	0	0	0	0	0	0	0	0	0	0
87	282	0	0	0	0	0	0	0	0	0	0	0	0	0	0	0	0	0	0	0
87	283	0	0	0	0	0	0	0	0	0	0	0	0	0	0	0	0	0	0	0
87	284	0	0	0	0	0	0	0	0	0	0	0	0	0	0	0	0	0	0	0
87	285	0	0	0	0	0	0	0	0	0	0	0	0	0	0	0	0	0	0	0
87	286	0	0	0	0	0	0	0	0	0	0	0	0	0	0	0	0	0	0	0
87	287	0	0	0	0	0	0	0	0	0	0	0	0	0	0	0	0	0	0	0
87	288	0	0	0	0	0	0	0	0	0	0	0	0	0	0	0	0	0	0	0
87	289	0	0	0	0	0	0	0	0	0	0	0	0	0	0	0	0	0	0	0
87	290	0	0	0	0	0	0	0	0	0	0	0	0	0	0	0	0	0	0	0
87	291	144000000000	542253134880	220175873280	144023840640	96743684160	72674353440	56119500000	45538012800	36160351200	29393530560	24325696800	20102675040	15969314880	1.2638e+10	9.93493e+09	7.53992e+09	5563231200	3807277920	2158901280
87	292	0	0	0	0	0	0	0	0	0	0	0	0	0	0	0	0	0	0	0
87	293	0	0	0	0	0	0	0	0	0	0	0	0	0	0	0	0	0	0	0
87	294	109000000000	410455497930	166660904080	1.09018e+11	73229594260	5.50104e+10	42479343750	34469745800	2.73714e+10	22249269660	18413201050	15216608190	12087884180	9566296710	7.52019e+09	5707303220	4.21106e+09	2881897870	1634168330
87	295	0	0	0	0	0	0	0	0	0	0	0	0	0	0	0	0	0	0	0
87	296	170000000000	640159950900	259929850400	1.70028e+11	114211293800	85796111700	66252187500	5.37602e+10	42689303500	34700695800	28717836500	23732324700	18852663400	1.49199e+10	1.17287e+10	8901298600	6567703500	4494703100	2548702900
87	297	25700000000	97868783716	42038693788	28462631266	19810746826	15273929424	12084067783	9.99109e+09	8080479635	6669538327	5587634890	4670416282	3.75282e+09	3000069711	2.37862e+09	1820019002	1349885304	918311115	514772285
87	298	156000000000	594067325280	255176507040	172769279280	1.20252e+11	92713345920	73350761640	6.06463e+10	49048825800	40484357160	33917161200	28349608560	2.27798e+10	18210539880	1.44383e+10	11047586160	8193856320	5574184200	3124687800
87	299	69900000000	266187859212	114338704116	77413927062	5.38821e+10	41542710768	32866783581	2.71742e+10	21977646945	18140106189	15197497230	12702805374	1.02071e+10	8159722677	6.46949e+09	4950168414	3671477928	2497663305	1400100495
87	300	119000000000	453166741720	194653873960	131791950220	91730695420	70723642080	55953465610	4.62623e+10	37415450450	30882298090	25872706300	21625662940	1.73769e+10	13891373370	1.10139e+10	8427325340	6250441680	4252102050	2383575950
87	301	384000000000	1462319569920	628126786560	425278225920	296004933120	228217466880	180555720960	149283240960	120735571200	99653802240	83488396800	69783651840	5.60733e+10	44825944320	3.55405e+10	27194058240	20169492480	13721068800	7691539200
87	302	72538389213	2.76235e+11	1.18654e+11	8.03359e+10	5.59159e+10	4.31107e+10	3.41073e+10	2.81999e+10	2.28072e+10	1.88248e+10	1.57711e+10	1.31823e+10	1.05924e+10	8.46771e+09	6.71368e+09	5.13701e+09	3.81006e+09	2.59194e+09	1.45295e+09
87	303	339000000000	1290953995320	554518178760	375440933820	2.61317e+11	201473232480	159396847410	1.31789e+11	106586871450	87975622290	73704600300	61605880140	4.95022e+10	39572903970	3.13756e+10	24007254540	17805880080	12113131050	6790186950
87	304	181000000000	689270422280	296070178040	200456663780	139523158580	107571253920	85105691390	70365277640	56909214550	46972234910	39352603700	32892815060	2.64304e+10	21128895630	1.67522e+10	12818032660	9506974320	6467482950	3625439050
87	305	14489917979	5.51794e+10	2.37018e+10	1.60475e+10	1.11695e+10	8.61159e+09	6.81312e+09	5.63308e+09	4.55586e+09	3.76035e+09	3.15036e+09	2.63323e+09	2.11588e+09	1.69147e+09	1.34109e+09	1.02614e+09	7.61079e+08	5.17753e+08	2.90234e+08
87	306	0	0	0	0	0	0	0	0	0	0	0	0	0	0	0	0	0	0	0
87	307	0	0	0	0	0	0	0	0	0	0	0	0	0	0	0	0	0	0	0
87	308	0	0	0	0	0	0	0	0	0	0	0	0	0	0	0	0	0	0	0
87	309	0	0	0	0	0	0	0	0	0	0	0	0	0	0	0	0	0	0	0
87	310	0	0	0	0	0	0	0	0	0	0	0	0	0	0	0	0	0	0	0
87	311	0	0	0	0	0	0	0	0	0	0	0	0	0	0	0	0	0	0	0
87	312	54400000000	210451439072	97883381184	69253590880	50518075296	40286518400	3.2878e+10	27840792288	23036475872	19374259168	16477262784	1.39688e+10	11395734848	9222714880	7.38325e+09	5699650656	4257860256	2913267968	1639675296
87	313	7750000000	2.99816e+10	13944783165	9.86609e+09	7.19697e+09	5739347750	4683910280	3.96629e+09	3.28185e+09	2.76012e+09	2347404165	1.99004e+09	1623473255	1313897800	1.05184e+09	8.11991e+08	6.06589e+08	415033580	2.33593e+08
87	314	21400000000	82787882282	38505594804	27243140530	19872919326	15848005400	1.29336e+10	10952076378	9062143082	7621491658	6481864404	5495089218	4482880988	3628053280	2.90444e+09	2242141986	1674967086	1146028208	645019326
87	315	353000000000	1365613198390	635162381580	449384514350	327810304770	261418033000	2.13345e+11	180658082310	149483014390	125718997910	106920473580	90643294110	73946588260	59845925600	4.79097e+10	36984865470	27629129970	18904110160	10639804770
87	316	589000000000	2278601059070	1059803520540	749822886550	5.4697e+11	436190429000	3.55977e+11	301437990030	249420667070	209769092830	178402716540	151243343430	123383967380	99856232800	7.994e+10	61711291110	46100729610	31542552080	17753102010
87	317	566000000000	2.18962e+12	1018419002760	720542875700	525610856940	419157526000	3.42077e+11	289667066820	239680980580	201577770020	171436226760	145337406420	118565917720	95956923200	7.68184e+10	59301512340	44300531340	30310839520	17059856940
87	318	718000000000	2777649508340	1291916685480	914045556100	666764302620	531722798000	4.33942e+11	367457515860	304047604340	255711729460	217475637480	184367946660	150406941560	121726273600	9.74481e+10	75227006820	56197493820	38450852960	21641302620
87	319	837000000000	3.2647e+12	1585078408980	1.1485e+12	858110671710	695301089400	575696492910	492898100940	4.12375e+11	349956429480	2.99969e+11	256185980280	210636850410	1.71581e+11	137984137200	106962104880	80172664380	55001329020	31014256590
87	320	945000000000	3.68595e+12	1789604655300	1.2967e+12	968834629350	785017359000	649979911350	556497855900	4.65584e+11	395112097800	3.38675e+11	289242235800	237815798850	1.93721e+11	155788542000	120763666800	9.05175e+10	62098274700	35016096150
87	321	561000000000	2.18817e+12	1062400223940	7.69784e+11	575149446630	4.66026e+11	3.85861e+11	330365393820	276394416870	234558610440	2.01055e+11	171708882840	141179537730	1.15002e+11	92483991600	71691446640	5.37358e+10	36864690060	20787333270
87	322	876000000000	3.41682e+12	1658935109040	1.20202e+12	898094323080	727698631200	602521060680	515864679120	4.31589e+11	366262643040	3.13946e+11	268122961440	220451470680	1.79576e+11	144413505600	111946002240	83908308240	57564114960	32459365320
87	323	1240000000000	4.83659e+12	2348264309600	1.70148e+12	1271275069200	1.03008e+12	8.52884e+11	730219408800	610925270800	518453969600	4.44399e+11	379534785600	312054593200	2.54194e+11	204420944000	158462377600	1.18774e+11	81483450400	45947046800
87	324	1520000000000	5.92872e+12	2878517540800	2.08569e+12	1558337181600	1262673424000	1.04547e+12	895107662400	748876138400	635524220800	5.44747e+11	465236188800	382518533600	311593205600	250580512000	194244204800	145594324800	99882939200	56322186400
87	325	1550000000000	6.04574e+12	2935330387000	2.12686e+12	1589093836500	1287594610000	1.0661e+12	912774261000	7.63657e+11	648067462000	5.55499e+11	474418482000	390068241500	317743071500	255526180000	198077972000	148467897000	101854313000	57433808500
87	326	2060000000000	8.03498e+12	3901148772400	2.82666e+12	2111956969800	1.71125e+12	1416887425800	1213106437200	1.01492e+12	861302562400	7.38275e+11	630517466400	518413275800	4.22291e+11	339602536000	263252014400	1.97319e+11	135367667600	76331384200
87	327	1830000000000	7.13787e+12	3465583618200	2.51106e+12	1876155948900	1520192346000	1258691256900	1077662514600	9.01607e+11	765137713200	6.55847e+11	560119885200	460532181900	3.75142e+11	301685748000	233859799200	175287904200	120253801800	67808948100
87	328	2360000000000	9.20512e+12	4469277234400	3.23831e+12	2419523518800	1.96047e+12	1.62323e+12	1389772423200	1162728741200	986734974400	8.45791e+11	722340398400	593910354800	4.83789e+11	389059216000	301589686400	2.26054e+11	155081405600	87447605200
87	329	2840000000000	1.10774e+13	5378282773600	3.89695e+12	2911629997200	2359205608000	1.95338e+12	1672438000800	1399215942800	1187426833600	1.01782e+12	869257089600	714705681200	582187305200	468189904000	362929961600	2.72032e+11	186623386400	105233558800
87	330	2260000000000	8.81508e+12	4279901080400	3.10109e+12	2317001335800	1.8774e+12	1.55445e+12	1330883761200	1113460574200	944924170400	8.09953e+11	691732754400	568744661800	4.6329e+11	372573656000	288810462400	2.16476e+11	148510159600	83742198200
87	331	2480000000000	9.67318e+12	4696528619200	3.40297e+12	2542550138400	2.06015e+12	1.70577e+12	1460438817600	1221850541600	1036907939200	8.88798e+11	759069571200	624109186400	5.08389e+11	408841888000	316924755200	2.37549e+11	162966900800	91894093600
87	332	3080000000000	1.20135e+13	5832785543200	4.22627e+12	3157683236400	2558575096000	2.11845e+12	1813770789600	1517459543600	1287772763200	1.10383e+12	942715435200	775103344400	631386232400	507755248000	393600099200	295020079200	202394376800	114126535600
87	333	3090000000000	1.20525e+13	5851723158600	4.23999e+12	3167935454700	2566882158000	2.12533e+12	1819659655800	1.52239e+12	1291953843600	1.10741e+12	945776199600	777619913700	633436187700	509403804000	394878021600	295977936600	203051501400	114497076300
87	334	3570000000000	14225982080100	7.59017e+12	5844848982000	4632204733800	3.91361e+12	3.36337e+12	2961938821800	2548488411000	2212485258900	1.92896e+12	1673442605100	1399721030400	1155996916200	9.3971e+11	735608353200	555723657300	383634449100	217269378900
87	335	3790000000000	15102653244700	8.05791e+12	6205035754000	4917662728600	4.15479e+12	3.57063e+12	3144467264600	2705538117000	2348828888300	2.04783e+12	1776567919700	1485978348800	1227234821400	9.9762e+11	780939960400	589969933100	407275787700	230658528300
87	336	3020000000000	12034304168600	6420812487000	4944382052000	3918559746800	3.31068e+12	2.8452e+12	2505617714800	2.15586e+12	1871626185400	1.63178e+12	1415629318600	1184077734400	9.77902e+11	7.94937e+11	622279335200	470107967800	324531102600	183796505400
87	337	3300000000000	13150067469000	7.01612e+12	5402801580000	4281869922000	3.61763e+12	3.10899e+12	2737926642000	2355745590000	2045154441000	1.78307e+12	1546879719000	1293859776000	1.06857e+12	8.6864e+11	679974108000	513694137000	354620079000	200837241000
87	338	4520000000000	18011607563600	9609957762000	7400200952000	5864864256800	4.95505e+12	4.25838e+12	3750129824800	3226657596000	2801241840400	2.44227e+12	2.11876e+12	1772195814400	1.46362e+12	1.18977e+12	931358475200	703605302800	485722047600	275086160400
87	339	5620000000000	22394963386600	11948664297000	9201134812000	7292154230800	6.16093e+12	5294711871000	4662772038800	4.01191e+12	3482959987400	3.03662e+12	2634383036600	2203482406400	1.8198e+12	1.47932e+12	1158016511200	874836681800	603928740600	342031907400
87	340	5340000000000	21279200086200	11353357179000	8742715284000	6928844055600	5.85398e+12	5030918397000	4430463111600	3.81202e+12	3309431731800	2.88533e+12	2503132636200	2093700364800	1.72914e+12	1.40562e+12	1100321738400	831250512600	573839764200	324991171800
87	341	6210000000000	24746036055300	13203061438500	10167090246000	8057700671400	6.80772e+12	5.85056e+12	5152280135400	4433084883000	3848608811700	3.35541e+12	2910946380300	2434808851200	2.01085e+12	1.63462e+12	1279587639600	966678966900	667330512300	377939171700
87	342	5980000000000	23829516201400	12714059163000	9790531348000	7759267313200	6.55558e+12	5.63387e+12	4961454945200	4.2689e+12	3706067744600	3.23114e+12	2803133551400	2344630745600	1.93638e+12	1.57408e+12	1232195504800	930876042200	642614567400	363941424600
87	343	4120000000000	1.64177e+13	8.75952e+12	6745315912000	5345849720800	4.51655e+12	3.88153e+12	3418259928800	2941112676000	2553344332400	2.22614e+12	1.93126e+12	1615364326400	1334091679200	1.08448e+12	848937371200	641339346800	442737795600	250742252400
87	344	4010000000000	1.59793e+13	8.52565e+12	6565222526000	5203120723400	4.39597e+12	3.7779e+12	3326995707400	2862587823000	2485172517700	2.1667e+12	1.87969e+12	1572235667200	1298472726600	1.05553e+12	826271567600	624216208900	430917126300	244047677700
87	345	4430000000000	17652969359900	9418609045500	7252851818000	5748085986200	4.85639e+12	4.17359e+12	3675459098200	3162409989000	2745464901100	2.39364e+12	2.07657e+12	1736908729600	1.43447e+12	1.16608e+12	912813726800	689595462700	476050590900	269608781100
87	346	4440000000000	17692818049200	9439870014000	7269223944000	5761061349600	4.86735e+12	4.18301e+12	3683755845600	3169548612000	2751662338800	2.39904e+12	2.08126e+12	1740829516800	1.43771e+12	1.16872e+12	914874254400	691152111600	477125197200	270217378800
87	347	4460000000000	17772515427800	9482391951000	7301968196000	5787012076400	4.88928e+12	4.20185e+12	3700349340400	3183825858000	2764057214200	2.40985e+12	2.09063e+12	1748671091200	1.44419e+12	1.17398e+12	918995309600	694265409400	479274409800	271434574200
87	348	4470000000000	17812364117100	9503652919500	7318340322000	5799987439800	4.90024e+12	4.21127e+12	3708646087800	3190964481000	2770254651900	2.41525e+12	2.09532e+12	1752591878400	1.44742e+12	1.17661e+12	921055837200	695822058300	480349016100	272043171900
87	349	4480000000000	17852212806400	9524913888000	7334712448000	5812962803200	4.9112e+12	4.2207e+12	3716942835200	3198103104000	2776452089600	2.42065e+12	2.10001e+12	1756512665600	1.45066e+12	1.17924e+12	923116364800	697378707200	481423622400	272651769600
87	350	0	0	0	0	0	0	0	0	0	0	0	0	0	0	0	0	0	0	0
86	280	0	0	0	0	0	0	0	0	0	0	0	0	0	0	0	0	0	0	0
86	281	0	0	0	0	0	0	0	0	0	0	0	0	0	0	0	0	0	0	0
86	282	0	0	0	0	0	0	0	0	0	0	0	0	0	0	0	0	0	0	0
86	283	0	0	0	0	0	0	0	0	0	0	0	0	0	0	0	0	0	0	0
86	284	0	0	0	0	0	0	0	0	0	0	0	0	0	0	0	0	0	0	0
86	285	0	0	0	0	0	0	0	0	0	0	0	0	0	0	0	0	0	0	0
86	286	0	0	0	0	0	0	0	0	0	0	0	0	0	0	0	0	0	0	0
86	287	0	0	0	0	0	0	0	0	0	0	0	0	0	0	0	0	0	0	0
86	288	0	0	0	0	0	0	0	0	0	0	0	0	0	0	0	0	0	0	0
86	289	0	0	0	0	0	0	0	0	0	0	0	0	0	0	0	0	0	0	0
86	290	0	0	0	0	0	0	0	0	0	0	0	0	0	0	0	0	0	0	0
86	291	87400000000	329117527698	133634523088	8.74145e+10	58718041636	44109295074	34061418750	2.7639e+10	21947324270	17840240076	14764346530	12201206934	9692486948	7.67059e+09	6.02995e+09	4576314692	3376572270	2310806182	1310333138
86	292	0	0	0	0	0	0	0	0	0	0	0	0	0	0	0	0	0	0	0
86	293	0	0	0	0	0	0	0	0	0	0	0	0	0	0	0	0	0	0	0
86	294	43991216497	1.65655e+11	6.72625e+10	4.39985e+10	2.95547e+10	2.22016e+10	1.71442e+10	1.39116e+10	1.10468e+10	8.97956e+09	7.43137e+09	6.14126e+09	4.87854e+09	3.86085e+09	3.03507e+09	2.30341e+09	1.69954e+09	1.1631e+09	6.59533e+08
86	295	0	0	0	0	0	0	0	0	0	0	0	0	0	0	0	0	0	0	0
86	296	199000000000	749363707230	304270824880	1.99033e+11	133694396860	1.00432e+11	77554031250	6.2931e+10	49971596450	40620226260	33616761550	27780780090	22068705980	17465073810	1.37295e+10	10419755420	7.68808e+09	5261446570	2983481630
86	297	6424393632	2.44649e+10	1.05087e+10	7.11499e+09	4.95222e+09	3.81812e+09	3.02073e+09	2.49754e+09	2.01993e+09	1.66723e+09	1.39678e+09	1.16749e+09	9.38117e+08	7.49947e+08	5.946e+08	4.54962e+08	3.37439e+08	2.29556e+08	1.28681e+08
86	298	204000000000	776857271520	333692355360	225929057520	157252620720	121240529280	95920226760	7.93067e+10	64140772200	52941082440	44353210800	37072565040	2.97889e+10	23813782920	1.88809e+10	14446843440	10715042880	7289317800	4086130200
86	299	54600000000	207923563848	89311777464	60469247748	42088201428	32449671072	25672766574	2.12262e+10	17167089030	14169525006	11871006420	9922362996	7.97292e+09	6373688958	5.05342e+09	3866655156	2867849712	1950964470	1093640730
86	300	119000000000	453166741720	194653873960	131791950220	91730695420	70723642080	55953465610	4.62623e+10	37415450450	30882298090	25872706300	21625662940	1.73769e+10	13891373370	1.10139e+10	8427325340	6250441680	4252102050	2383575950
86	301	531000000000	2022113780280	868581572040	588080046780	4.09319e+11	315581965920	249674707890	2.06431e+11	166954657050	137802523410	115448798700	96497706060	7.75389e+10	61985876130	4.91459e+10	37604283660	27890626320	18973665450	10635956550
86	302	81283805740	3.09539e+11	1.3296e+11	9.00214e+10	6.26573e+10	4.83083e+10	3.82194e+10	3.15998e+10	2.55569e+10	2.10944e+10	1.76725e+10	1.47716e+10	1.18694e+10	9.4886e+09	7.5231e+09	5.75635e+09	4.26941e+09	2.90443e+09	1.62812e+09
86	303	372000000000	1416622083360	608497824480	411988281360	286754778960	221085671040	174913354680	144618139680	116962584600	96539620920	80879384400	67602912720	5.4321e+10	43425133560	3.44299e+10	26344243920	19539195840	13292285400	7451178600
86	304	216000000000	822554758080	353321317440	239219002080	166502774880	128372325120	101562593040	8.39718e+10	67913758800	56055263760	46962223200	39253304160	3.15412e+10	25214593680	1.99916e+10	15296657760	11345339520	7718101200	4326490800
86	305	43067208476	1.64005e+11	7.04471e+10	4.76967e+10	3.31982e+10	2.55955e+10	2.02501e+10	1.67427e+10	1.3541e+10	1.11766e+10	9.36357e+09	7.82653e+09	6.28886e+09	5.02742e+09	3.98602e+09	3.04993e+09	2.26209e+09	1.53888e+09	8.62638e+08
86	306	0	0	0	0	0	0	0	0	0	0	0	0	0	0	0	0	0	0	0
86	307	0	0	0	0	0	0	0	0	0	0	0	0	0	0	0	0	0	0	0
86	308	0	0	0	0	0	0	0	0	0	0	0	0	0	0	0	0	0	0	0
86	309	106000000000	4.07905e+11	185207983780	1.2907e+11	92874389940	73149210340	5.90243e+10	49548507500	40686687020	3.40051e+10	28775674780	24280215840	19722418300	1.59086e+10	12695245820	9.77186e+09	7282775580	4.97358e+09	2.79559e+09
86	310	0	0	0	0	0	0	0	0	0	0	0	0	0	0	0	0	0	0	0
86	311	165000000000	638317783950	296888931900	210052251750	153225779850	122192565000	9.9722e+10	84443579550	69871663950	58763837550	49976991900	42368678550	34564269300	27973308000	2.23941e+10	17287543350	12914465850	8836198800	4973279850
86	312	153000000000	591894672390	275297009580	194775724350	142082086770	113305833000	9.24695e+10	78302228310	64790088390	54490103910	46342301580	39287320110	32050504260	25938885600	2.07654e+10	16030267470	11975231970	8193566160	4611586770
86	313	178000000000	688609488140	320280181080	226601823100	165298114020	131819858000	1.07579e+11	91096710060	75376704140	63393715660	53914573080	45706816860	37287514760	30177265600	2.41584e+10	18649592220	13931969220	9532384160	5365114020
86	314	43900000000	169831216457	78990449154	55886629405	40767343851	32510627900	2.65321e+10	22467109953	18590097257	15634742233	13296908754	11272636293	9196190438	7442595280	5.95818e+09	4599534261	3436030611	2350964408	1323193851
86	315	494000000000	1911084759220	888867468840	628883711300	458748698460	365837134000	298561506880	252818959380	209191527220	175935368180	149628084840	1.26849e+11	103483327480	83750388800	6.70465e+10	51757857060	38665128060	26455043680	14889698460
86	316	772000000000	2986553510360	1389080335920	982789929400	716910921480	571713092000	4.66578e+11	395093596440	326914694360	274943530840	233831743920	1.98234e+11	161718884240	130881174400	1.04777e+11	80884748280	60424046280	41342699840	23268921480
86	317	751000000000	2905313065130	1351294471860	956056006450	697409458590	556161311000	4.53886e+11	384346231770	318021937130	267464496970	227471035860	1.92842e+11	157319795420	127320935200	1.01927e+11	78684515490	58780386990	40218092720	22635958590
86	318	1020000000000	3.94596e+12	1835313397200	1298504829000	947213911800	755372220000	616463030400	522014855400	431933922600	363267359400	308948677200	2.61915e+11	213670028400	172925904000	138436001400	106868449800	79834879800	54623774400	30743911800
86	319	1150000000000	4.48555e+12	2177825771000	1.57799e+12	1179005104500	9.55312e+11	7.90981e+11	677219613000	566583920500	480824246000	4.12144e+11	351987906000	289405469500	2.35745e+11	189583940000	146961076000	1.10154e+11	75569329000	42612180500
86	320	1420000000000	5.53868e+12	2689141386800	1.94847e+12	1455814998600	1179602804000	9.76689e+11	836219000400	699607971400	593713416800	5.08908e+11	434628544800	357352840600	291093652600	234094952000	181464980800	1.36016e+11	93311693200	52616779400
86	321	1020000000000	3.97849e+12	1931636770800	1.39961e+12	1045726266600	8.4732e+11	701565618600	600664352400	5.02535e+11	426470200800	3.65554e+11	312197968800	256690068600	2.09095e+11	168152712000	130348084800	9.77015e+10	67026709200	37795151400
86	322	1430000000000	5.57768e+12	2708079002200	1.9622e+12	1466067216900	1187909866000	9.83567e+11	842107866600	704534788100	597894497200	5.12492e+11	437689309200	359869409900	293143607900	235743508000	182742903200	1.36974e+11	93968817800	52987320100
86	323	1960000000000	7.64493e+12	3711772618400	2.68944e+12	2009434786800	1628184152000	1348106482800	1154217775200	9.65656e+11	819491758400	7.02437e+11	599909822400	493247582800	4.01791e+11	323116976000	250472790400	1.8774e+11	128796421600	72625977200
86	324	2310000000000	9.0101e+12	4374589157400	3.1697e+12	2368262427300	1.91893e+12	1.58884e+12	1360328092200	1138094657700	965829572400	8.27872e+11	707036576400	581327508300	4.7354e+11	380816436000	295200074400	2.21265e+11	151795782600	85594901700
86	325	2660000000000	1.03753e+13	5037405696400	3.64996e+12	2727090067800	2209678492000	1.82957e+12	1566438409200	1310533242200	1112167386400	9.53307e+11	814163330400	669407433800	5.45288e+11	438515896000	339927358400	2.5479e+11	174795143600	98563826200
86	326	3350000000000	1.30666e+13	6344101159000	4.59675e+12	3434493130500	2782865770000	2304161590500	1972770177000	1.65048e+12	1400661934000	1.20059e+12	1025356074000	843050715500	6.86735e+11	552266260000	428104004000	320882229000	220136741000	124131134500
86	327	3150000000000	1.22865e+13	5965348851000	4.32232e+12	3229448764500	2616724530000	2.1666e+12	1854992853000	1.55195e+12	1317040326000	1.12892e+12	964140786000	792719329500	645735919500	519295140000	402545556000	301725081000	206994249000	116720320500
86	328	4480000000000	1.74741e+13	8484051699200	6.1473e+12	4592993798400	3.72156e+12	3.08139e+12	2638212057600	2207213881600	1873124019200	1.60557e+12	1371222451200	1127423046400	9.1838e+11	738553088000	572509235200	4.2912e+11	294391820800	166002233600
86	329	8110000000000	3.16329e+13	15358406089400	1.11283e+13	8314549041300	6.73703e+12	5578134477300	4775870488200	3.99565e+12	3390856204400	2.90651e+12	2482279928400	2040937702300	1.66251e+12	1336978916000	1036395066400	7.76822e+11	532928050600	300508507700
86	330	6940000000000	2.70693e+13	13142705087600	9.52282e+12	7115039500200	5765101028000	4773397444200	4086873142800	3.41921e+12	2901669797600	2.4872e+12	2124170493600	1746499094200	1.42267e+12	1144097864000	886878145600	664753035600	456044472400	257155245800
86	331	7680000000000	2.99557e+13	14544088627200	1.05382e+13	7873703654400	6379823616000	5282376422400	4522649241600	3.7838e+12	3211069747200	2.75241e+12	2350667059200	1932725222400	1.57437e+12	1266091008000	981444403200	7.35634e+11	504671692800	284575257600
86	332	9870000000000	3.84977e+13	18691426399800	1.35433e+13	10118939462100	8.19907e+12	6.78868e+12	5812310939400	4862768082900	4126726354800	3.53727e+12	3020974462800	2483853899100	2.02331e+12	1627124772000	1261309408800	9.45405e+11	648581980200	365723670900
86	333	10000000000000	3.90048e+13	18937615400000	1.37216e+13	10252218300000	8.30706e+12	6.87809e+12	5888866200000	4926816700000	4181080400000	3.58386e+12	3060764400000	2516569300000	2.04996e+12	1648556000000	1277922400000	9.57857e+11	657124600000	370540700000
86	334	11800000000000	47021453374000	25087942830000	19319108680000	15310928812000	1.29358e+13	1.1117e+13	9790161932000	8.42358e+12	7312976486000	6.37582e+12	5531266874000	4626528896000	3.82094e+12	3.10605e+12	2431422568000	1836845702000	1268035434000	718145286000
86	335	11600000000000	46224479588000	24662723460000	18991666160000	15051421544000	1.27165e+13	10928586780000	9624226984000	8.2808e+12	7189027732000	6.26776e+12	5437516588000	4548113152000	3.75618e+12	3.0534e+12	2390212016000	1805712724000	1246543308000	705973332000
86	336	10200000000000	40645663086000	21686187870000	16699568520000	13234870668000	1.11818e+13	9609619410000	8462682348000	7.2814e+12	6321386454000	5.51131e+12	4781264586000	3999202944000	3.30285e+12	2.68489e+12	2101738152000	1587781878000	1096098426000	620769654000
86	337	11200000000000	44630532016000	23812284720000	18336781120000	14532407008000	1.2278e+13	10551738960000	9292357088000	7.99526e+12	6941130224000	6.05163e+12	5250016016000	4391281664000	3.62666e+12	2.94811e+12	2307790912000	1743446768000	1203559056000	681629424000
86	338	12900000000000	51404809197000	27426649365000	21120042540000	16738218786000	1.41416e+13	1.21533e+13	10702804146000	9208823670000	7994694633000	6.97018e+12	6046893447000	5057815488000	4.17713e+12	3.39559e+12	2658080604000	2008077081000	1386242127000	785091033000
86	339	13400000000000	53397243662000	2.84897e+13	21938648840000	17386986956000	1.46898e+13	1.26244e+13	11117641516000	9565754820000	8304566518000	7.24034e+12	6281269162000	5253854848000	4.33904e+12	3.5272e+12	2761106984000	2085909526000	1439972442000	815520918000
86	340	13600000000000	54194217448000	2.89149e+13	22266091360000	17646494224000	1.4909e+13	1.28128e+13	11283576464000	9708527280000	8428515272000	7.34841e+12	6375019448000	5332270592000	4403797776000	3.57985e+12	2802317536000	2117042504000	1461464568000	827692872000
86	341	14100000000000	56186651913000	2.9978e+13	23084697660000	18295262394000	1.54571e+13	1.32839e+13	11698413834000	10065458430000	8738387157000	7.61857e+12	6609395163000	5528309952000	4565702106000	3.71146e+12	2905343916000	2194874949000	1515194883000	858122757000
86	342	14300000000000	56983625699000	3.04032e+13	23412140180000	18554769662000	1.56764e+13	1.34723e+13	11864348782000	10208230890000	8862335911000	7.72664e+12	6703145449000	5606725696000	4630463838000	3.76411e+12	2946554468000	2226007927000	1536687009000	870294711000
86	343	13400000000000	53397243662000	2.84897e+13	21938648840000	17386986956000	1.46898e+13	1.26244e+13	11117641516000	9565754820000	8304566518000	7.24034e+12	6281269162000	5253854848000	4.33904e+12	3.5272e+12	2761106984000	2085909526000	1439972442000	815520918000
86	344	12900000000000	51404809197000	27426649365000	21120042540000	16738218786000	1.41416e+13	1.21533e+13	10702804146000	9208823670000	7994694633000	6.97018e+12	6046893447000	5057815488000	4.17713e+12	3.39559e+12	2658080604000	2008077081000	1386242127000	785091033000
86	345	14200000000000	56585138806000	3.01906e+13	23248418920000	18425016028000	1.55668e+13	1.33781e+13	11781381308000	10136844660000	8800361534000	7.6726e+12	6656270306000	5567517824000	4598082972000	3.73778e+12	2925949192000	2210441438000	1525940946000	864208734000
86	346	14200000000000	56585138806000	3.01906e+13	23248418920000	18425016028000	1.55668e+13	1.33781e+13	11781381308000	10136844660000	8800361534000	7.6726e+12	6656270306000	5567517824000	4598082972000	3.73778e+12	2925949192000	2210441438000	1525940946000	864208734000
86	347	14200000000000	56585138806000	3.01906e+13	23248418920000	18425016028000	1.55668e+13	1.33781e+13	11781381308000	10136844660000	8800361534000	7.6726e+12	6656270306000	5567517824000	4598082972000	3.73778e+12	2925949192000	2210441438000	1525940946000	864208734000
86	348	14300000000000	56983625699000	3.04032e+13	23412140180000	18554769662000	1.56764e+13	1.34723e+13	11864348782000	10208230890000	8862335911000	7.72664e+12	6703145449000	5606725696000	4630463838000	3.76411e+12	2946554468000	2226007927000	1536687009000	870294711000
86	349	14300000000000	56983625699000	3.04032e+13	23412140180000	18554769662000	1.56764e+13	1.34723e+13	11864348782000	10208230890000	8862335911000	7.72664e+12	6703145449000	5606725696000	4630463838000	3.76411e+12	2946554468000	2226007927000	1536687009000	870294711000
86	350	0	0	0	0	0	0	0	0	0	0	0	0	0	0	0	0	0	0	0
85	280	0	0	0	0	0	0	0	0	0	0	0	0	0	0	0	0	0	0	0
85	281	0	0	0	0	0	0	0	0	0	0	0	0	0	0	0	0	0	0	0
85	282	0	0	0	0	0	0	0	0	0	0	0	0	0	0	0	0	0	0	0
85	283	0	0	0	0	0	0	0	0	0	0	0	0	0	0	0	0	0	0	0
85	284	0	0	0	0	0	0	0	0	0	0	0	0	0	0	0	0	0	0	0
85	285	0	0	0	0	0	0	0	0	0	0	0	0	0	0	0	0	0	0	0
85	286	0	0	0	0	0	0	0	0	0	0	0	0	0	0	0	0	0	0	0
85	287	0	0	0	0	0	0	0	0	0	0	0	0	0	0	0	0	0	0	0
85	288	0	0	0	0	0	0	0	0	0	0	0	0	0	0	0	0	0	0	0
85	289	0	0	0	0	0	0	0	0	0	0	0	0	0	0	0	0	0	0	0
85	290	0	0	0	0	0	0	0	0	0	0	0	0	0	0	0	0	0	0	0
85	291	131000000000	498864228280	214282836040	145081894780	1.00981e+11	77855437920	61595831890	5.09274e+10	41188437050	33996479410	28481718700	23806402060	1.91292e+10	15292184130	1.21245e+10	9277139660	6880738320	4680885450	2623936550
85	292	0	0	0	0	0	0	0	0	0	0	0	0	0	0	0	0	0	0	0
85	293	0	0	0	0	0	0	0	0	0	0	0	0	0	0	0	0	0	0	0
85	294	118000000000	449358617840	193018127120	130684454840	90959849240	70129325760	55483268420	4.58735e+10	37101034900	30622782980	25655288600	21443934680	1.72309e+10	13774639140	1.09213e+10	8356507480	6197916960	4216370100	2363545900
85	295	0	0	0	0	0	0	0	0	0	0	0	0	0	0	0	0	0	0	0
85	296	230000000000	875868492400	376221773200	254723937400	177294621400	136692753600	108145353700	8.94144e+10	72315576500	59688475300	50006071000	41797499800	3.35856e+10	26848872900	2.12873e+10	16288107800	12080685600	8218348500	4606911500
85	297	0	0	0	0	0	0	0	0	0	0	0	0	0	0	0	0	0	0	0
85	298	115000000000	437934246200	188110886600	127361968700	88647310700	68346376800	54072676850	4.47072e+10	36157788250	29844237650	25003035500	20898749900	1.67928e+10	13424436450	1.06437e+10	8144053900	6040342800	4109174250	2303455750
85	299	185000000000	704502917800	302613165400	204886645300	142606543300	109948519200	86986480150	71920311400	58166876750	48010295350	40222274500	33619728100	2.70145e+10	21595832550	1.71224e+10	13101304100	9717073200	6610410750	3705559250
85	300	175000000000	666421679000	286255697000	193811691500	1.34898e+11	104005356000	82284508250	6.80327e+10	55022721250	45415144250	38048097500	31802445500	2.55542e+10	20428490250	1.61969e+10	12393125500	9191826000	6253091250	3505258750
85	301	482000000000	1835515710160	788429976880	533812773160	3.71548e+11	286460466240	226635045580	1.87382e+11	151548295100	125086283020	104795331400	87593021320	7.03837e+10	56265898860	4.46108e+10	34134208520	25316915040	17222799900	9654484100
85	302	92279523963	3.51412e+11	1.50946e+11	1.02199e+11	7.11333e+10	5.48432e+10	4.33896e+10	3.58744e+10	2.90141e+10	2.39479e+10	2.00632e+10	1.67698e+10	1.3475e+10	1.07722e+10	8.54079e+09	6.53504e+09	4.84696e+09	3.29733e+09	1.84836e+09
85	303	381000000000	1.46615e+12	665700394530	4.63922e+11	333822099690	262923105090	2.12153e+11	178094163750	146241771270	1.22226e+11	103429548030	87271341840	70889069550	5.7181e+10	45631025070	3.51234e+10	26176768830	1.78767e+10	10048311120
85	304	231000000000	8.88924e+11	403613625030	2.81275e+11	202396076190	159410071590	1.28628e+11	107978351250	88666270770	7.41054e+10	62709253530	52912545840	42979987050	34668787230	27666054570	2.12953e+10	15870954330	1.08387e+10	6.09228e+09
85	305	86100000000	3.31326e+11	150437805693	1.04839e+11	75438537489	59416481229	4.79433e+10	40246476375	33048337287	2.76211e+10	23373449043	19721948904	16019813355	1.2922e+10	10311893067	7.93733e+09	5915537523	4.03986e+09	2270760072
85	306	0	0	0	0	0	0	0	0	0	0	0	0	0	0	0	0	0	0	0
85	307	0	0	0	0	0	0	0	0	0	0	0	0	0	0	0	0	0	0	0
85	308	0	0	0	0	0	0	0	0	0	0	0	0	0	0	0	0	0	0	0
85	309	12800000000	4.92564e+10	22364737664	1.55858e+10	11215020672	8833112192	7.12746e+09	5983216000	4913109376	4.10627e+09	3474798464	2931950592	2381575040	1.92104e+09	1533010816	1.18e+09	879429504	6.00583e+08	3.37581e+08
85	310	25200000000	97488534276	45343036872	3.20807e+10	23401755468	18662137200	1.52303e+10	12896837604	10671308676	8974840644	7632849672	6.47085e+09	5278906584	4272287040	3.42018e+09	2640279348	1972391148	1349528544	759555468
85	311	160000000000	618974820800	287892297600	203687032000	148582574400	118489760000	9.67001e+10	81884683200	67754340800	56983115200	48462537600	41084779200	33516867200	27125632000	2.17155e+10	16763678400	12523118400	8568435200	4822574400
85	312	236000000000	912987860680	424641138960	300438372200	219159297240	174772396000	142632622720	120779907720	99937652680	84050094920	71482242960	6.06e+10	49437379120	40010307200	3.20303e+10	24726425640	18471599640	12638441920	7113297240
85	313	194000000000	750506970220	349069410840	246970526300	180156371460	143668834000	1.17249e+11	99285178380	82152138220	69092027180	58760826840	4.98153e+10	40639201480	32889828800	2.633e+10	20325960060	15184281060	10389227680	5847371460
85	314	173000000000	669266524990	311283546780	220236603350	160654908570	128117053000	1.04557e+11	88537813710	73259380990	61612993310	52400118780	44422917510	36240112660	29329589600	2.34798e+10	18125727270	13540621770	9264620560	5214408570
85	315	568000000000	2.21547e+12	1075656554720	7.7939e+11	582325999440	4.71841e+11	3.90676e+11	334487600160	279843188560	237485366720	2.03563e+11	173851417920	142941136240	1.16437e+11	93637980800	72585992320	5.44063e+10	37324677280	21046711760
85	316	939000000000	3.66255e+12	1778242086060	1.28846e+12	962683298370	780033121800	645853054770	552964536180	4.62628e+11	392603449560	3.36525e+11	287405777160	236305857270	1.92491e+11	154799408400	119996913360	89942809860	61703999940	34793771730
85	317	901000000000	3.51433e+12	1706279147540	1.23632e+12	923724868830	748466286200	619716296430	530586844620	4.43906e+11	376715344040	3.22906e+11	275774872440	226742893930	1.84701e+11	148534895600	115140808240	86302951740	59206926460	33385717070
85	318	1340000000000	5.22664e+12	2537640463600	1.8387e+12	1373797252200	1113146308000	9.21665e+11	789108070800	660193437800	560264773600	4.80237e+11	410142429600	337220286200	2.74694e+11	220906504000	171241601600	1.28353e+11	88054696400	49652453800
85	319	1600000000000	6.24076e+12	3030018464000	2.19546e+12	1640354928000	1329129920000	1100495088000	942218592000	7.88291e+11	668972864000	5.73418e+11	489722304000	402651088000	327992848000	263768960000	204467584000	153257184000	105139936000	59286512000
85	320	1870000000000	7.29389e+12	3541334079800	2.56595e+12	1917164822100	1553420594000	1286203634100	1101217979400	9.21315e+11	781862034800	6.70182e+11	572362942800	470598459100	3.83342e+11	308279972000	238971488800	179119333800	122882300200	69291110900
85	321	1580000000000	6.16275e+12	2992143233200	2.16802e+12	1619850491400	1312515796000	1.08674e+12	930440859600	7.78437e+11	660610703200	5.6625e+11	483600775200	397617949400	323892937400	260471848000	201911739200	151341469200	103825686800	58545430600
85	322	2080000000000	8.11299e+12	3939024003200	2.8541e+12	2132461406400	1.72787e+12	1430643614400	1224884169600	1.02478e+12	869664723200	7.45443e+11	636638995200	523446414400	4.26391e+11	342899648000	265807859200	1.99234e+11	136681916800	77072465600
85	323	2850000000000	1.11164e+13	5397220389000	3.91067e+12	2921882215500	2367512670000	1.96026e+12	1678326867000	1404142759500	1191607914000	1.0214e+12	872317854000	717222250500	584237260500	469838460000	364207884000	2.72989e+11	187280511000	105604099500
85	324	3310000000000	1.29106e+13	6268350697400	4.54187e+12	3393484257300	2749637522000	2276649213300	1949214712200	1.63078e+12	1383937612400	1.18626e+12	1013113016400	832984438300	6.78535e+11	545672036000	422992314400	317050799400	217508242600	122648971700
85	325	4550000000000	1.77472e+13	8616615007000	6.24335e+12	4664759326500	3.77971e+12	3.12953e+12	2679434121000	2241701598500	1902391582000	1.63066e+12	1392647802000	1145039031500	9.3273e+11	750092980000	581454692000	4.35825e+11	298991693000	168596018500
85	326	7210000000000	2.81224e+13	13654020703400	9.89331e+12	7391849394300	5989391702000	4959105990300	4245872530200	3.55223e+12	3014558968400	2.58396e+12	2206811132400	1814446465300	1.47802e+12	1188608876000	921382050400	690615185400	473786836600	267159844700
85	327	7980000000000	3.11258e+13	15112217089200	1.09499e+13	8181270203400	6.62904e+12	5488719251400	4699315227600	3.9316e+12	3336502159200	2.85992e+12	2442489991200	2008222301400	1.63586e+12	1315547688000	1019782075200	7.6437e+11	524385430800	295691478600
85	328	11400000000000	4.44654e+13	21588881556000	1.56427e+13	11687528862000	9470050680000	7.84103e+12	6713307468000	5616571038000	4766431656000	4.0856e+12	3489271416000	2868889002000	2336949042000	1879353840000	1456831536000	1.09196e+12	749122044000	422416398000
85	329	13700000000000	5.34365e+13	25944533098000	1.87987e+13	14045539071000	11380674940000	9422989191000	8067746694000	6.74974e+12	5728080148000	4.90989e+12	4193247228000	3447699941000	2.80844e+12	2258521720000	1750753688000	1312264638000	900260702000	507640759000
85	330	13100000000000	5.10962e+13	24808276174000	1.79754e+13	13430405973000	10882251220000	9010303533000	7714414722000	6.45413e+12	5477215324000	4.69486e+12	4009601364000	3296705783000	2685441443000	2159608360000	1674078344000	1254793194000	860833226000	485408317000
85	331	13300000000000	5.18763e+13	25187028482000	1.82498e+13	13635450339000	11048392460000	9147865419000	7832192046000	6.55267e+12	5560836932000	4.76654e+12	4070816652000	3347037169000	2.72644e+12	2192579480000	1699636792000	1273950342000	873975718000	492819131000
85	332	13800000000000	5.38266e+13	26133909252000	1.89359e+13	14148061254000	11463745560000	9491770134000	8126635356000	6.79901e+12	5769890952000	4.94573e+12	4223854872000	3472865634000	2.82894e+12	2275007280000	1763532912000	1321843212000	906831948000	511346166000
85	333	13700000000000	5.34365e+13	25944533098000	1.87987e+13	14045539071000	11380674940000	9422989191000	8067746694000	6.74974e+12	5728080148000	4.90989e+12	4193247228000	3447699941000	2.80844e+12	2258521720000	1750753688000	1312264638000	900260702000	507640759000
85	334	14300000000000	5.57768e+13	27080790022000	1.9622e+13	14660672169000	11879098660000	9835674849000	8421078666000	7.04535e+12	5978944972000	5.12492e+12	4376893092000	3598694099000	2.93144e+12	2357435080000	1827429032000	1369736082000	939688178000	529873201000
85	335	14300000000000	56983625699000	3.04032e+13	23412140180000	18554769662000	1.56764e+13	1.34723e+13	11864348782000	10208230890000	8862335911000	7.72664e+12	6703145449000	5606725696000	4630463838000	3.76411e+12	2946554468000	2226007927000	1536687009000	870294711000
85	336	13800000000000	54991191234000	2.93401e+13	22593533880000	17906001492000	1.51283e+13	1.30012e+13	11449511412000	9851299740000	8552464026000	7.45647e+12	6468769734000	5410686336000	4468559508000	3.63249e+12	2843528088000	2148175482000	1482956694000	839864826000
85	337	14200000000000	56585138806000	3.01906e+13	23248418920000	18425016028000	1.55668e+13	1.33781e+13	11781381308000	10136844660000	8800361534000	7.6726e+12	6656270306000	5567517824000	4598082972000	3.73778e+12	2925949192000	2210441438000	1525940946000	864208734000
85	338	15300000000000	60968494629000	3.25293e+13	25049352780000	19852306002000	1.67726e+13	1.44144e+13	12694023522000	10922093190000	9482079681000	8.26696e+12	7171896879000	5998804416000	4954272498000	4.02733e+12	3152607228000	2381672817000	1644147639000	931154481000
85	339	16000000000000	6.37579e+13	3.40175e+13	26195401600000	20760581440000	1.754e+13	1.50739e+13	13274795840000	11421796800000	9915900320000	8.64519e+12	7.50002e+12	6273259520000	5180938560000	4.21159e+12	3296844160000	2490638240000	1719370080000	973756320000
85	340	16200000000000	6.45549e+13	3.44428e+13	26522844120000	21020088708000	1.77593e+13	1.52623e+13	13440730788000	11564569260000	10039849074000	8.75325e+12	7.59377e+12	6351675264000	5245700292000	4.26423e+12	3338054712000	2521771218000	1740862206000	985928274000
85	341	16600000000000	6.61488e+13	35293207710000	27177729160000	21539103244000	1.81978e+13	1.56392e+13	13772600684000	11850114180000	10287746582000	8.96938e+12	7.78127e+12	6508506752000	5.37522e+12	4.36952e+12	3420475816000	2584037174000	1783846458000	1010272182000
85	342	17000000000000	6.77428e+13	36143646450000	27832614200000	22058117780000	1.86363e+13	1.6016e+13	14104470580000	12135659100000	10535644090000	9.18551e+12	7.96877e+12	6665338240000	5.50475e+12	4.47481e+12	3502896920000	2646303130000	1826830710000	1034616090000
85	343	16200000000000	6.45549e+13	3.44428e+13	26522844120000	21020088708000	1.77593e+13	1.52623e+13	13440730788000	11564569260000	10039849074000	8.75325e+12	7.59377e+12	6351675264000	5245700292000	4.26423e+12	3338054712000	2521771218000	1740862206000	985928274000
85	344	16300000000000	6.49534e+13	3.46554e+13	26686565380000	21149842342000	1.78689e+13	1.53565e+13	13523698262000	11635955490000	10101823451000	8.80728e+12	7.64065e+12	6390883136000	5278081158000	4.29055e+12	3358659988000	2537337707000	1751608269000	992014251000
85	345	16900000000000	6.73443e+13	35931036765000	27668892940000	21928364146000	1.85266e+13	1.59218e+13	14021503106000	12064272870000	10473669713000	9.13148e+12	7.9219e+12	6626130368000	5.47237e+12	4.44849e+12	3482291644000	2630736641000	1816084647000	1028530113000
85	346	17000000000000	6.77428e+13	36143646450000	27832614200000	22058117780000	1.86363e+13	1.6016e+13	14104470580000	12135659100000	10535644090000	9.18551e+12	7.96877e+12	6665338240000	5.50475e+12	4.47481e+12	3502896920000	2646303130000	1826830710000	1034616090000
85	347	17000000000000	6.77428e+13	36143646450000	27832614200000	22058117780000	1.86363e+13	1.6016e+13	14104470580000	12135659100000	10535644090000	9.18551e+12	7.96877e+12	6665338240000	5.50475e+12	4.47481e+12	3502896920000	2646303130000	1826830710000	1034616090000
85	348	17000000000000	6.77428e+13	36143646450000	27832614200000	22058117780000	1.86363e+13	1.6016e+13	14104470580000	12135659100000	10535644090000	9.18551e+12	7.96877e+12	6665338240000	5.50475e+12	4.47481e+12	3502896920000	2646303130000	1826830710000	1034616090000
85	349	17100000000000	6.81413e+13	36356256135000	27996335460000	22187871414000	1.87459e+13	1.61102e+13	14187438054000	12207045330000	10597618467000	9.23954e+12	8.01565e+12	6704546112000	5.53713e+12	4.50113e+12	3523502196000	2661869619000	1837576773000	1040702067000
85	350	0	0	0	0	0	0	0	0	0	0	0	0	0	0	0	0	0	0	0
84	280	0	0	0	0	0	0	0	0	0	0	0	0	0	0	0	0	0	0	0
84	281	0	0	0	0	0	0	0	0	0	0	0	0	0	0	0	0	0	0	0
84	282	0	0	0	0	0	0	0	0	0	0	0	0	0	0	0	0	0	0	0
84	283	0	0	0	0	0	0	0	0	0	0	0	0	0	0	0	0	0	0	0
84	284	0	0	0	0	0	0	0	0	0	0	0	0	0	0	0	0	0	0	0
84	285	0	0	0	0	0	0	0	0	0	0	0	0	0	0	0	0	0	0	0
84	286	0	0	0	0	0	0	0	0	0	0	0	0	0	0	0	0	0	0	0
84	287	0	0	0	0	0	0	0	0	0	0	0	0	0	0	0	0	0	0	0
84	288	0	0	0	0	0	0	0	0	0	0	0	0	0	0	0	0	0	0	0
84	289	0	0	0	0	0	0	0	0	0	0	0	0	0	0	0	0	0	0	0
84	290	0	0	0	0	0	0	0	0	0	0	0	0	0	0	0	0	0	0	0
84	291	180000000000	685462298400	294434431200	199349168400	138752312400	106976937600	84635494200	69976519200	56594799000	46712719800	39135186000	32711086800	2.62844e+10	21012161400	1.66596e+10	12747214800	9454449600	6431751000	3605409000
84	292	0	0	0	0	0	0	0	0	0	0	0	0	0	0	0	0	0	0	0
84	293	0	0	0	0	0	0	0	0	0	0	0	0	0	0	0	0	0	0	0
84	294	119000000000	453166741720	194653873960	131791950220	91730695420	70723642080	55953465610	4.62623e+10	37415450450	30882298090	25872706300	21625662940	1.73769e+10	13891373370	1.10139e+10	8427325340	6250441680	4252102050	2383575950
84	295	0	0	0	0	0	0	0	0	0	0	0	0	0	0	0	0	0	0	0
84	296	220000000000	837787253600	359864304800	243648983600	169586159600	130749590400	103443381800	8.55269e+10	69171421000	57093324200	47831894000	39980217200	3.21253e+10	25681530600	2.03618e+10	15579929200	11555438400	7861029000	4406611000
84	297	0	0	0	0	0	0	0	0	0	0	0	0	0	0	0	0	0	0	0
84	298	88868347982	3.38422e+11	1.45366e+11	9.84213e+10	6.85038e+10	5.28159e+10	4.17856e+10	3.45483e+10	2.79416e+10	2.30627e+10	1.93216e+10	1.61499e+10	1.29769e+10	1.0374e+10	8.22508e+09	6.29347e+09	4.66779e+09	3.17544e+09	1.78004e+09
84	299	33260456617	1.2666e+11	5.44057e+10	3.68358e+10	2.56387e+10	1.97672e+10	1.5639e+10	1.29303e+10	1.04576e+10	8.63159e+09	7.23141e+09	6.04436e+09	4.85683e+09	3.88263e+09	3.07837e+09	2.35543e+09	1.747e+09	1.18846e+09	6.66209e+08
84	300	194000000000	738776032720	317334886960	214854103720	149544158920	115297366080	91218254860	75419137360	60996616700	50345931340	42179033800	35255282440	2.83287e+10	22646440620	1.79554e+10	13738664840	10189795680	6931998300	3885829700
84	301	335000000000	1275721499800	547975191400	371010952300	2.58233e+11	199095967200	157516058650	1.30234e+11	105329209250	86937561850	72834929500	60878967100	4.89181e+10	39105967050	3.10054e+10	23723983100	17595781200	11970203250	6710066750
84	302	165000000000	628340440200	269898228600	182736737700	1.2719e+11	98062192800	77582536350	6.41451e+10	51878565750	42819993150	35873920500	29985162900	2.4094e+10	19261147950	1.52713e+10	11684946900	8666578800	5895771750	3304958250
84	303	431000000000	1.65856e+12	753062651030	5.24804e+11	377630774190	297427449590	2.39995e+11	201466101250	165433604770	1.38266e+11	117002979530	98724273840	80192097050	6.46851e+10	51619348570	3.97327e+10	29612040330	2.02228e+10	1.1367e+10
84	304	305000000000	1.17369e+12	532909764650	3.71381e+11	267232914450	210476501450	1.69834e+11	142568818750	117070184350	9.78448e+10	82797932150	69862885200	56748467750	4.57748e+10	36528773350	2.81171e+10	20955156150	1.43108e+10	8.04392e+09
84	305	0	0	0	0	0	0	0	0	0	0	0	0	0	0	0	0	0	0	0
84	306	0	0	0	0	0	0	0	0	0	0	0	0	0	0	0	0	0	0	0
84	307	0	0	0	0	0	0	0	0	0	0	0	0	0	0	0	0	0	0	0
84	308	0	0	0	0	0	0	0	0	0	0	0	0	0	0	0	0	0	0	0
84	309	68400000000	2.63214e+11	119511566892	8.32868e+10	59930266716	47201943276	3.80874e+10	31972810500	26254428228	2.19429e+10	18568454292	15667610976	12726541620	10265562972	8192026548	6.30561e+09	4699451412	3.20937e+09	1.80395e+09
84	310	16200000000	6.26712e+10	29149095132	20623311990	15043985658	11997088200	9790883424	8290824174	6860127006	5769540414	4906831932	4.15983e+09	3393582804	2746470240	2198689434	1697322438	1267965738	867554064	488285658
84	311	134000000000	5.18391e+11	241109799240	170587889300	124437906060	99235174000	80986319680	68578422180	56744260420	47723358980	40587375240	34408502580	28070376280	22717716800	18186690380	14039580660	10488111660	7176064480	4038906060
84	312	314000000000	1214738085820	564988634040	399735800300	291593302260	232536154000	1.89774e+11	160698690780	132967893820	111829363580	95107730040	80628879180	65776851880	53234052800	4.26166e+10	32898718860	24576619860	16815554080	9464302260
84	313	307000000000	1187657937410	552393346020	390824492650	285092814630	227352227000	1.85543e+11	157116235890	130003641410	109336352290	92987494020	78831420090	64310488940	52047306400	4.16665e+10	32165307930	24028733430	16440685040	9253314630
84	314	325000000000	1257292604750	584781229500	413739283750	301808354250	240682325000	1.96422e+11	166328262750	137626004750	115746952750	98439529500	83453457750	68081136500	55098940000	4.41095e+10	34051221750	25437584250	17404634000	9795854250
84	315	773000000000	3.01507e+12	1463877670420	1.06068e+12	792496474590	642135892600	5.31677e+11	455209357260	3.80843e+11	323197514920	2.77032e+11	236597088120	194530806890	158461544690	127433378800	98783401520	74042377020	50795731580	28642796110
84	316	1240000000000	4.83659e+12	2348264309600	1.70148e+12	1271275069200	1.03008e+12	8.52884e+11	730219408800	610925270800	518453969600	4.44399e+11	379534785600	312054593200	2.54194e+11	204420944000	158462377600	1.18774e+11	81483450400	45947046800
84	317	1400000000000	5.46067e+12	2651266156000	1.92103e+12	1435310562000	1162988680000	9.62933e+11	824441268000	689754338000	585351256000	5.01741e+11	428507016000	352319702000	286993742000	230797840000	178909136000	1.341e+11	91997444000	51875698000
84	318	1870000000000	7.29389e+12	3541334079800	2.56595e+12	1917164822100	1553420594000	1286203634100	1101217979400	9.21315e+11	781862034800	6.70182e+11	572362942800	470598459100	3.83342e+11	308279972000	238971488800	179119333800	122882300200	69291110900
84	319	2250000000000	8.77607e+12	4260963465000	3.08737e+12	2306749117500	1.86909e+12	1.54757e+12	1324994895000	1108533757500	940743090000	8.06369e+11	688671990000	566228092500	4.6124e+11	370925100000	287532540000	2.15518e+11	147853035000	83371657500
84	320	2750000000000	1.07263e+13	5207844235000	3.77345e+12	2819360032500	2284442050000	1.89148e+12	1619438205000	1354874592500	1149797110000	9.85562e+11	841710210000	692056557500	563737707500	453352900000	351428660000	2.63411e+11	180709265000	101898692500
84	321	2580000000000	1.00632e+13	4885904773200	3.54019e+12	2645072321400	2.14322e+12	1.77455e+12	1519327479600	1271118708600	1078718743200	9.24636e+11	789677215200	649274879400	5.28888e+11	425327448000	329703979200	2.47127e+11	169538146800	95599500600
84	322	3020000000000	1.17794e+13	5719159850800	4.14394e+12	3096169926600	2508732724000	2.07718e+12	1778437592400	1487898643400	1262686280800	1.08233e+12	924350848800	760003928600	619086500600	497863912000	385932564800	289272934800	198451629200	111903291400
84	323	4050000000000	1.57969e+13	7669734237000	5.55727e+12	4152148411500	3.36436e+12	2785628191500	2384990811000	1.99536e+12	1693337562000	1.45146e+12	1239609582000	1019210566500	8.30232e+11	667665180000	517558572000	3.87932e+11	266135463000	150068983500
84	324	6020000000000	2.34809e+13	11400444470800	8.26043e+12	6171835416600	5000851324000	4.14061e+12	3545097452400	2965943653400	2517010400800	2.15748e+12	1842580168800	1514974718600	1234073090600	992430712000	769309284800	576630154800	395589009200	223065501400
84	325	12100000000000	4.71958e+13	22914514634000	1.66032e+13	12405184143000	10051545020000	8.32249e+12	7125528102000	5961448207000	5059107284000	4.33647e+12	3703524924000	3045048853000	2480445913000	1994752760000	1546286104000	1159007454000	795120766000	448354247000
84	326	14800000000000	5.7727e+13	28027670792000	2.0308e+13	15173283084000	12294451760000	10179579564000	8715521976000	7.29169e+12	6187998992000	5.30412e+12	4529931312000	3724522564000	3.03393e+12	2439862880000	1891325152000	1417628952000	972544408000	548400236000
84	327	14400000000000	5.61668e+13	27270166176000	1.97592e+13	14763194352000	11962169280000	9904455792000	8479967328000	7.09462e+12	6020755776000	5.16076e+12	4407500736000	3623859792000	2.95194e+12	2373920640000	1840208256000	1379314656000	946259424000	533578608000
84	328	15400000000000	6.00673e+13	29163927716000	2.11313e+13	15788416182000	12792875480000	10592265222000	9068853948000	7.5873e+12	6438863816000	5.51915e+12	4713577176000	3875516722000	3.15693e+12	2538776240000	1968000496000	1.4751e+12	1011971884000	570632678000
84	329	16500000000000	6.43578e+13	31247065410000	2.26407e+13	16916160195000	1.37067e+13	11348855595000	9716629230000	8.12925e+12	6898782660000	5.91337e+12	5050261260000	4152339345000	3.38243e+12	2720117400000	2108571960000	1.58046e+12	1084255590000	611392155000
84	330	15800000000000	6.16275e+13	29921432332000	2.16802e+13	16198504914000	13125157960000	10867388994000	9304408596000	7.78437e+12	6606107032000	5.6625e+12	4836007752000	3976179494000	3.23893e+12	2604718480000	2019117392000	1.51341e+12	1038256868000	585454306000
84	331	16100000000000	6.27977e+13	30489560794000	2.20919e+13	16506071463000	1.33744e+13	11073731823000	9481074582000	7.93217e+12	6731539444000	5.77002e+12	4927830684000	4051676573000	3.30043e+12	2654175160000	2057455064000	1.54215e+12	1057970606000	596570527000
84	332	16700000000000	6.51379e+13	31625817718000	2.29152e+13	17121204561000	1.38728e+13	11486417481000	9834406554000	8.22778e+12	6982404268000	5.98505e+12	5111476548000	4202670731000	3.42343e+12	2753088520000	2134130408000	1.59962e+12	1097398082000	618802969000
84	333	16700000000000	6.51379e+13	31625817718000	2.29152e+13	17121204561000	1.38728e+13	11486417481000	9834406554000	8.22778e+12	6982404268000	5.98505e+12	5111476548000	4202670731000	3.42343e+12	2753088520000	2134130408000	1.59962e+12	1097398082000	618802969000
84	334	17300000000000	6.74782e+13	32762074642000	2.37385e+13	17736337659000	1.43712e+13	11899103139000	10187738526000	8.52339e+12	7233269092000	6.20008e+12	5295122412000	4353664889000	3.54642e+12	2852001880000	2210805752000	1.65709e+12	1136825558000	641035411000
84	335	17300000000000	6.89382e+13	36781475505000	28323777980000	22447378682000	1.89651e+13	1.62987e+13	14353373002000	12349817790000	10721567221000	9.34761e+12	8.1094e+12	6782961856000	5.60189e+12	4.55378e+12	3564712748000	2693002597000	1859068899000	1052874021000
84	336	16600000000000	6.61488e+13	35293207710000	27177729160000	21539103244000	1.81978e+13	1.56392e+13	13772600684000	11850114180000	10287746582000	8.96938e+12	7.78127e+12	6508506752000	5.37522e+12	4.36952e+12	3420475816000	2584037174000	1783846458000	1010272182000
84	337	17200000000000	6.85397e+13	36568865820000	28160056720000	22317625048000	1.88555e+13	1.62045e+13	14270405528000	12278431560000	10659592844000	9.29358e+12	8.06252e+12	6743753984000	5.56951e+12	4.52746e+12	3544107472000	2677436108000	1848322836000	1046788044000
84	338	18600000000000	74118562098000	39545401410000	30452154360000	24134175924000	2.03903e+13	1.75234e+13	15431950164000	13277838780000	11527234122000	1.005e+13	8.71878e+12	7292664192000	6.02284e+12	4.89597e+12	3832581336000	2895366954000	1998767718000	1131991722000
84	339	19500000000000	77704944135000	41458888575000	31925645700000	25301958630000	2.13769e+13	18371331225000	16178657430000	1.39203e+13	12085003515000	1.05363e+13	9140652885000	7645535040000	6.31427e+12	5.13287e+12	4018028820000	3035465355000	2095482285000	1186765515000
84	340	19700000000000	78501917921000	41884107945000	32253088220000	25561465898000	2.15961e+13	18559755135000	16344592378000	1.40631e+13	12208952269000	1.06444e+13	9234403171000	7723950784000	6.37903e+12	5.18552e+12	4059239372000	3066598333000	2116974411000	1198937469000
84	341	20100000000000	80095865493000	42734546685000	32907973260000	26080480434000	2.20346e+13	18936602955000	16676462274000	1.43486e+13	12456849777000	1.08605e+13	9421903743000	7880782272000	6.50855e+12	5.29081e+12	4141660476000	3128864289000	2159958663000	1223281377000
84	342	20500000000000	81689813065000	43584985425000	33562858300000	26599494970000	2.24731e+13	19313450775000	17008332170000	1.46342e+13	12704747285000	1.10766e+13	9609404315000	8037613760000	6.63808e+12	5.3961e+12	4224081580000	3191130245000	2202942915000	1247625285000
84	343	19500000000000	77704944135000	41458888575000	31925645700000	25301958630000	2.13769e+13	18371331225000	16178657430000	1.39203e+13	12085003515000	1.05363e+13	9140652885000	7645535040000	6.31427e+12	5.13287e+12	4018028820000	3035465355000	2095482285000	1186765515000
84	344	19500000000000	77704944135000	41458888575000	31925645700000	25301958630000	2.13769e+13	18371331225000	16178657430000	1.39203e+13	12085003515000	1.05363e+13	9140652885000	7645535040000	6.31427e+12	5.13287e+12	4018028820000	3035465355000	2095482285000	1186765515000
84	345	20300000000000	80892839279000	43159766055000	33235415780000	26339987702000	2.22539e+13	19125026865000	16842397222000	1.44914e+13	12580798531000	1.09686e+13	9515654029000	7959198016000	6.57332e+12	5.34345e+12	4182871028000	3159997267000	2181450789000	1235453331000
84	346	20400000000000	81291326172000	43372375740000	33399137040000	26469741336000	2.23635e+13	19219238820000	16925364696000	1.45628e+13	12642772908000	1.10226e+13	9562529172000	7998405888000	6.6057e+12	5.36977e+12	4203476304000	3175563756000	2192196852000	1241539308000
84	347	20400000000000	81291326172000	43372375740000	33399137040000	26469741336000	2.23635e+13	19219238820000	16925364696000	1.45628e+13	12642772908000	1.10226e+13	9562529172000	7998405888000	6.6057e+12	5.36977e+12	4203476304000	3175563756000	2192196852000	1241539308000
84	348	20500000000000	81689813065000	43584985425000	33562858300000	26599494970000	2.24731e+13	19313450775000	17008332170000	1.46342e+13	12704747285000	1.10766e+13	9609404315000	8037613760000	6.63808e+12	5.3961e+12	4224081580000	3191130245000	2202942915000	1247625285000
84	349	20500000000000	81689813065000	43584985425000	33562858300000	26599494970000	2.24731e+13	19313450775000	17008332170000	1.46342e+13	12704747285000	1.10766e+13	9609404315000	8037613760000	6.63808e+12	5.3961e+12	4224081580000	3191130245000	2202942915000	1247625285000
84	350	0	0	0	0	0	0	0	0	0	0	0	0	0	0	0	0	0	0	0
83	280	0	0	0	0	0	0	0	0	0	0	0	0	0	0	0	0	0	0	0
83	281	0	0	0	0	0	0	0	0	0	0	0	0	0	0	0	0	0	0	0
83	282	0	0	0	0	0	0	0	0	0	0	0	0	0	0	0	0	0	0	0
83	283	0	0	0	0	0	0	0	0	0	0	0	0	0	0	0	0	0	0	0
83	284	0	0	0	0	0	0	0	0	0	0	0	0	0	0	0	0	0	0	0
83	285	0	0	0	0	0	0	0	0	0	0	0	0	0	0	0	0	0	0	0
83	286	0	0	0	0	0	0	0	0	0	0	0	0	0	0	0	0	0	0	0
83	287	0	0	0	0	0	0	0	0	0	0	0	0	0	0	0	0	0	0	0
83	288	0	0	0	0	0	0	0	0	0	0	0	0	0	0	0	0	0	0	0
83	289	0	0	0	0	0	0	0	0	0	0	0	0	0	0	0	0	0	0	0
83	290	0	0	0	0	0	0	0	0	0	0	0	0	0	0	0	0	0	0	0
83	291	148000000000	563602334240	242090532320	163909316240	1.14085e+11	87958815360	69589184120	5.75362e+10	46533501400	38408236280	32177819600	26895782480	2.16116e+10	17276666040	1.36979e+10	10481043280	7773658560	5288328600	2964447400
83	292	0	0	0	0	0	0	0	0	0	0	0	0	0	0	0	0	0	0	0
83	293	0	0	0	0	0	0	0	0	0	0	0	0	0	0	0	0	0	0	0
83	294	79474973871	3.02651e+11	1.30001e+11	8.80182e+10	6.1263e+10	4.72333e+10	3.73689e+10	3.08966e+10	2.49882e+10	2.0625e+10	1.72793e+10	1.44428e+10	1.16053e+10	9.27745e+09	7.35569e+09	5.62825e+09	4.1744e+09	2.8398e+09	1.59189e+09
83	295	0	0	0	0	0	0	0	0	0	0	0	0	0	0	0	0	0	0	0
83	296	219000000000	833979129720	358228557960	242541488220	168815313420	130155274080	102973184610	8.51381e+10	68857005450	56833809090	47614476300	39798488940	3.19793e+10	25564796370	2.02692e+10	15509111340	11502913680	7825297050	4386580950
83	297	50000000000	190406194000	81787342000	55374769000	38542309000	29715816000	23509859500	1.94379e+10	15720777500	12975755500	10870885000	9086413000	7.30121e+09	5836711500	4.62768e+09	3540893000	2626236000	1786597500	1001502500
83	298	228000000000	868252244640	372950279520	252508946640	175752929040	135504120960	107204959320	8.86369e+10	71686745400	59169445080	49571235600	41434043280	3.32935e+10	26615404440	2.11022e+10	16146472080	11975636160	8146884600	4566851400
83	299	136000000000	517904847680	222461570240	150619371680	1.04835e+11	80827019520	63946817840	5.28711e+10	42760514800	35294054960	29568807200	24715043360	1.98593e+10	15875855280	1.25873e+10	9631228960	7143361920	4859545200	2724086800
83	300	170000000000	647381059600	278076962800	188274214600	1.31044e+11	101033774400	79933522300	6.60889e+10	53450643500	44117568700	36961009000	30893804200	2.48241e+10	19844819100	1.57341e+10	12039036200	8929202400	6074431500	3405108500
83	301	472000000000	1797434471360	772072508480	522737819360	363839396960	280517303040	221933073680	1.83494e+11	148404139600	122491131920	102621154400	85775738720	6.89234e+10	55098556560	4.36853e+10	33426029920	24791667840	16865480400	9454183600
83	302	89700000000	341588712036	146726491548	99342335586	69144902346	53310173904	42176687943	34871632068	28203074835	23278505367	19502367690	16301024922	1.30984e+10	10471060431	8.30205e+09	6352362042	4711467384	3205155915	1796695485
83	303	312000000000	1.20062e+12	545140480560	3.79905e+11	273366128880	215307109680	1.73732e+11	145840890000	119757041040	1.0009e+11	84698212560	71466295680	58050891600	4.68254e+10	37367138640	2.87624e+10	21436094160	1.46392e+10	8.22854e+09
83	304	275000000000	1.05824e+12	480492410750	3.34852e+11	240947709750	189773894750	1.53129e+11	128545656250	105555084250	8.82207e+10	74653873250	62991126000	51166651250	41272365750	32935779250	2.53515e+10	18893993250	1.29032e+10	7.25272e+09
83	305	156000000000	6.00312e+11	272570240280	1.89952e+11	136683064440	107653554840	8.68659e+10	72920445000	59878520520	5.00452e+10	42349106280	35733147840	29025445800	2.34127e+10	18683569320	1.43812e+10	10718047080	7.31961e+09	4.11427e+09
83	306	0	0	0	0	0	0	0	0	0	0	0	0	0	0	0	0	0	0	0
83	307	0	0	0	0	0	0	0	0	0	0	0	0	0	0	0	0	0	0	0
83	308	0	0	0	0	0	0	0	0	0	0	0	0	0	0	0	0	0	0	0
83	309	211000000000	8.11961e+11	368668722430	2.56923e+11	184872606390	145608333790	1.17492e+11	98629576250	80989537370	6.76893e+10	57279880930	48331373040	39258776050	3.16672e+10	25270725170	1.94515e+10	14496845730	9.90024e+09	5.56481e+09
83	310	193000000000	746638377590	347270083980	245697482350	179227730370	142928273000	1.16644e+11	98773399110	81728673590	68735882710	58457935980	4.95585e+10	40429721060	32720293600	2.61943e+10	20221187070	15106011570	10335674960	5817230370
83	311	283000000000	1.09481e+12	509209501380	360271437850	262805428470	209578763000	1.71038e+11	144833533410	119840490290	100788885010	85718113380	72668703210	59282958860	47978461600	3.84092e+10	29650756170	22150265670	15155419760	8529928470
83	312	462000000000	1787289795060	831289009320	588146304900	429032183580	342139182000	279221490240	236442022740	195640659060	164538745140	139935577320	1.18632e+11	96779954040	78325262400	6.27034e+10	48405121380	36160504380	24741356640	13925183580
83	313	485000000000	1876267425550	872673527100	617426315750	450390928650	359172085000	293122127200	248212945950	205380345550	172730067950	146902067100	1.24538e+11	101598003700	82224572000	6.5825e+10	50814900150	37960702650	25973069200	14618428650
83	314	642000000000	2483636468460	1155167844120	817294215900	596187579780	475440162000	3.88009e+11	328562291340	271864292460	228644749740	194455932120	164852676540	134486429640	108841598400	8.71332e+10	67264259580	50249012580	34380846240	19350579780
83	315	1110000000000	4.32953e+12	2102075309400	1.5231e+12	1137996231300	9.22084e+11	7.63468e+11	653664148200	5.46877e+11	464099924400	3.97809e+11	339744848400	279339192300	2.27545e+11	182989716000	141849386400	1.06322e+11	72940830600	41130017700
83	316	1660000000000	6.47479e+12	3143644156400	2.27779e+12	1701868237800	1378972292000	1141763653800	977551789200	8.17852e+11	694059346400	5.94921e+11	508086890400	417750503800	3.40293e+11	273660296000	212135118400	159004328400	109082683600	61509756200
83	317	1940000000000	7.56692e+12	3673897387600	2.662e+12	1988930350200	1611570028000	1334350294200	1142440042800	9.55802e+11	811129597600	6.95269e+11	593788293600	488214444200	3.97691e+11	319819864000	247916945600	1.85824e+11	127482172400	71884895800
83	318	2520000000000	9.8292e+12	4772279080800	3.45786e+12	2583559011600	2.09338e+12	1.73328e+12	1483994282400	1241557808400	1053632260800	9.03133e+11	771312628800	634175463600	5.16589e+11	415436112000	322036444800	2.4138e+11	165595399200	93376256400
83	319	3040000000000	1.18574e+13	5757035081600	4.17138e+12	3116674363200	2525346848000	2.09094e+12	1790215324800	1497752276800	1271048441600	1.08949e+12	930472377600	765037067200	623186411200	501161024000	388488409600	291188649600	199765878400	112644372800
83	320	3790000000000	1.47828e+13	7177356236600	5.2005e+12	3885590735700	3148376498000	2606797739700	2231880289800	1.86726e+12	1584629471600	1.35828e+12	1160029707600	953779764700	7.76933e+11	624802724000	484332589600	3.63028e+11	249050223400	140434925300
83	321	3620000000000	1.41197e+13	6855416774800	4.96724e+12	3711303024600	3007156444000	2489870136600	2131769564400	1.78351e+12	1513551104800	1.29736e+12	1107996712800	910998086600	7.42084e+11	596777272000	462607908800	346744378800	237879105200	134135733400
83	322	4370000000000	1.70451e+13	8275737929800	5.99636e+12	4480219397100	3.63019e+12	3.00573e+12	2573434529400	2.15302e+12	1827132134800	1.56615e+12	1337554042800	1099740784100	8.9583e+11	720418972000	558452088800	4.18584e+11	287163450200	161926285900
83	323	9840000000000	3.83807e+13	18634613553600	1.35021e+13	10088182807200	8.17415e+12	6.76804e+12	5794644340800	4847987632800	4114183113600	3.52652e+12	3011792169600	2476304191200	2.01716e+12	1622179104000	1257475641600	9.42532e+11	646610606400	364612048800
83	324	14200000000000	5.53868e+13	26891413868000	1.94847e+13	14558149986000	11796028040000	9766893906000	8362190004000	6.99608e+12	5937134168000	5.08908e+12	4346285448000	3573528406000	2.91094e+12	2340949520000	1814649808000	1360157508000	933116932000	526167794000
83	325	16000000000000	6.24076e+13	30300184640000	2.19546e+13	16403549280000	1.32913e+13	11004950880000	9422185920000	7.88291e+12	6689728640000	5.73418e+12	4897223040000	4026510880000	3.27993e+12	2637689600000	2044675840000	1.53257e+12	1051399360000	592865120000
83	326	17100000000000	6.66981e+13	32383322334000	2.3464e+13	17531293293000	1.42051e+13	11761541253000	10069961202000	8.42486e+12	7149647484000	6.1284e+12	5233907124000	4303333503000	3.50542e+12	2819030760000	2185247304000	1.63794e+12	1123683066000	633624597000
83	327	16900000000000	6.5918e+13	32004570026000	2.31896e+13	17326248927000	1.40389e+13	11623979367000	9952183878000	8.32632e+12	7066025876000	6.05673e+12	5172691836000	4253002117000	3.46442e+12	2786059640000	2159688856000	1.61878e+12	1110540574000	626213783000
83	328	18200000000000	7.09887e+13	34466460028000	2.49734e+13	18659037306000	1.51189e+13	1.25181e+13	10717736484000	8966806394000	7609566328000	6.52263e+12	5570591208000	4580156126000	3.73092e+12	3000371920000	2325818768000	1.7433e+12	1195966772000	674384074000
83	329	19700000000000	7.68394e+13	37307102338000	2.70316e+13	20196870051000	1.63649e+13	1.35498e+13	11601066414000	9705828899000	8236728388000	7.06021e+12	6029705868000	4957641521000	4.03841e+12	3247655320000	2517507128000	1.88698e+12	1294535462000	729965179000
83	330	18900000000000	7.3719e+13	35792093106000	2.59339e+13	19376692587000	1.57003e+13	1.29996e+13	11129957118000	9311683563000	7902241956000	6.7735e+12	5784844716000	4756315977000	3.87442e+12	3115770840000	2415273336000	1.81035e+12	1241965494000	700321923000
83	331	19100000000000	7.44991e+13	36170845414000	2.62083e+13	19581736953000	1.58665e+13	1.31372e+13	11247734442000	9410219897000	7985863564000	6.84518e+12	5846060004000	4806647363000	3.91541e+12	3148741960000	2440831784000	1.82951e+12	1255107986000	707732737000
83	332	19900000000000	7.76195e+13	37685854646000	2.73061e+13	20401914417000	1.65311e+13	1.36874e+13	11718843738000	9804365233000	8320349996000	7.13188e+12	6090921156000	5007972907000	4.07941e+12	3280626440000	2543065576000	1.90614e+12	1307677954000	737375993000
83	333	19800000000000	7.72294e+13	37496478492000	2.71689e+13	20299392234000	1.6448e+13	1.36186e+13	11659955076000	9755097066000	8278539192000	7.09605e+12	6060313512000	4982807214000	4.05891e+12	3264140880000	2530286352000	1.89656e+12	1301106708000	733670586000
83	334	20600000000000	8.03498e+13	39011487724000	2.82666e+13	21119569698000	1.71125e+13	1.41689e+13	12131064372000	10149242402000	8613025624000	7.38275e+12	6305174664000	5184132758000	4.22291e+12	3396025360000	2632520144000	1.97319e+12	1353676676000	763313842000
83	335	20600000000000	82088299958000	43797595110000	33726579560000	26729248604000	2.25828e+13	19407662730000	17091299644000	1.47056e+13	12766721662000	1.11307e+13	9656279458000	8076821632000	6.67046e+12	5.42242e+12	4244686856000	3206696734000	2213688978000	1253711262000
83	336	19600000000000	78103431028000	41671498260000	32089366960000	25431712264000	2.14865e+13	18465543180000	16261624904000	1.39917e+13	12146977892000	1.05904e+13	9187528028000	7684742912000	6.34665e+12	5.15919e+12	4038634096000	3051031844000	2106228348000	1192851492000
83	337	20300000000000	80892839279000	43159766055000	33235415780000	26339987702000	2.22539e+13	19125026865000	16842397222000	1.44914e+13	12580798531000	1.09686e+13	9515654029000	7959198016000	6.57332e+12	5.34345e+12	4182871028000	3159997267000	2181450789000	1235453331000
83	338	22000000000000	87667116460000	46774130700000	36018677200000	28545799480000	2.41175e+13	20726630100000	18252844280000	1.5705e+13	13634362940000	1.18871e+13	10312531460000	8625731840000	7.12379e+12	5.79093e+12	4533160720000	3424627580000	2364133860000	1338914940000
83	339	23100000000000	92050472283000	49112837235000	37819611060000	29973089454000	2.53234e+13	21762961605000	19165486494000	1.64902e+13	14316081087000	1.24815e+13	10828158033000	9057018432000	7.47998e+12	6.08048e+12	4759818756000	3595858959000	2482340553000	1405860687000
83	340	23300000000000	92847446069000	49538056605000	38147053580000	30232596722000	2.55426e+13	21951385515000	19331421442000	1.6633e+13	14440029841000	1.25896e+13	10921908319000	9135434176000	7.54474e+12	6.13312e+12	4801029308000	3626991937000	2503832679000	1418032641000
83	341	23800000000000	94839880534000	50601105030000	38965659880000	30881364892000	2.60908e+13	2.24224e+13	19746258812000	1.69899e+13	14749901726000	1.28597e+13	11156284034000	9331473536000	7.70665e+12	6.26474e+12	4904055688000	3704824382000	2557562994000	1448462526000
83	342	24300000000000	96832314999000	51664153455000	39784266180000	31530133062000	2.66389e+13	2.28935e+13	20161096182000	1.73469e+13	15059773611000	1.31299e+13	11390659749000	9527512896000	7.86855e+12	6.39635e+12	5007082068000	3782656827000	2611293309000	1478892411000
83	343	22900000000000	91253498497000	48687617865000	37492168540000	29713582186000	2.51041e+13	21574537695000	18999551546000	1.63474e+13	14192132333000	1.23734e+13	10734407747000	8978602688000	7.41522e+12	6.02783e+12	4718608204000	3564725981000	2460848427000	1393688733000
83	344	22800000000000	90855011604000	48475008180000	37328447280000	29583828552000	2.49945e+13	21480325740000	18916584072000	1.62761e+13	14130157956000	1.23194e+13	10687532604000	8939394816000	7.38284e+12	6.00151e+12	4698002928000	3549159492000	2450102364000	1387602756000
83	345	23900000000000	95238367427000	50813714715000	39129381140000	31011118526000	2.62004e+13	2.25167e+13	19829226286000	1.70613e+13	14811876103000	1.29137e+13	11203159177000	9370681408000	7.73903e+12	6.29106e+12	4924660964000	3720390871000	2568309057000	1454548503000
83	346	23900000000000	95238367427000	50813714715000	39129381140000	31011118526000	2.62004e+13	2.25167e+13	19829226286000	1.70613e+13	14811876103000	1.29137e+13	11203159177000	9370681408000	7.73903e+12	6.29106e+12	4924660964000	3720390871000	2568309057000	1454548503000
83	347	24000000000000	95636854320000	51026324400000	39293102400000	31140872160000	2.631e+13	2.26109e+13	19912193760000	1.71327e+13	14873850480000	1.29678e+13	11250034320000	9409889280000	7.77141e+12	6.31738e+12	4945266240000	3735957360000	2579055120000	1460634480000
83	348	24100000000000	96035341213000	51238934085000	39456823660000	31270625794000	2.64196e+13	2.27051e+13	19995161234000	1.72041e+13	14935824857000	1.30218e+13	11296909463000	9449097152000	7.80379e+12	6.3437e+12	4965871516000	3751523849000	2589801183000	1466720457000
83	349	24100000000000	96035341213000	51238934085000	39456823660000	31270625794000	2.64196e+13	2.27051e+13	19995161234000	1.72041e+13	14935824857000	1.30218e+13	11296909463000	9449097152000	7.80379e+12	6.3437e+12	4965871516000	3751523849000	2589801183000	1466720457000
83	350	0	0	0	0	0	0	0	0	0	0	0	0	0	0	0	0	0	0	0
82	280	0	0	0	0	0	0	0	0	0	0	0	0	0	0	0	0	0	0	0
82	281	0	0	0	0	0	0	0	0	0	0	0	0	0	0	0	0	0	0	0
82	282	0	0	0	0	0	0	0	0	0	0	0	0	0	0	0	0	0	0	0
82	283	0	0	0	0	0	0	0	0	0	0	0	0	0	0	0	0	0	0	0
82	284	0	0	0	0	0	0	0	0	0	0	0	0	0	0	0	0	0	0	0
82	285	0	0	0	0	0	0	0	0	0	0	0	0	0	0	0	0	0	0	0
82	286	0	0	0	0	0	0	0	0	0	0	0	0	0	0	0	0	0	0	0
82	287	0	0	0	0	0	0	0	0	0	0	0	0	0	0	0	0	0	0	0
82	288	0	0	0	0	0	0	0	0	0	0	0	0	0	0	0	0	0	0	0
82	289	0	0	0	0	0	0	0	0	0	0	0	0	0	0	0	0	0	0	0
82	290	0	0	0	0	0	0	0	0	0	0	0	0	0	0	0	0	0	0	0
82	291	84700000000	322548092636	138547757348	93804858686	6.52907e+10	50338592304	39825701993	3.29278e+10	26630997085	21980929817	18415279190	15392383622	1.23683e+10	9887389281	7.83928e+09	5998272742	4448843784	3026496165	1696545235
82	292	0	0	0	0	0	0	0	0	0	0	0	0	0	0	0	0	0	0	0
82	293	0	0	0	0	0	0	0	0	0	0	0	0	0	0	0	0	0	0	0
82	294	123000000000	468399237240	201196861320	136221931740	9.48141e+10	73100907360	57834254370	4.78173e+10	38673112650	31920358530	26742377100	22352575980	1.7961e+10	14358310290	1.13841e+10	8710596780	6460540560	4395029850	2463696150
82	295	0	0	0	0	0	0	0	0	0	0	0	0	0	0	0	0	0	0	0
82	296	191000000000	727351661080	312427646440	211531617580	147231620380	113514417120	89807663290	74252862040	60053370050	49567386010	41526780700	34710097660	2.78906e+10	22296237930	1.76777e+10	13526211260	10032221520	6824802450	3825739550
82	297	31448484267	1.1976e+11	5.14418e+10	3.48291e+10	2.42419e+10	1.86903e+10	1.4787e+10	1.22259e+10	9.88789e+09	8.16136e+09	6.83746e+09	5.71508e+09	4.59224e+09	3.67111e+09	2.91067e+09	2.22711e+09	1.65182e+09	1.12372e+09	6.29915e+08
82	298	245000000000	932990350600	400757975800	271336368100	1.88857e+11	145607498400	115198311550	9.52458e+10	77031809750	63581201950	53267336500	44523423700	3.57759e+10	28599886350	2.26756e+10	17350375700	12868556400	8754327750	4907362250
82	299	252000000000	959647217760	412208203680	279088835760	1.94253e+11	149767712640	118489691880	9.79671e+10	79232718600	65397807720	54789260400	45795521520	3.67981e+10	29417025960	2.33235e+10	17846100720	13236229440	9004451400	5047572600
82	300	205000000000	780665395400	335328102200	227036552900	158023466900	121834845600	96390423950	7.96955e+10	64455187750	53200597550	44570628500	37254293300	2.9935e+10	23930517150	1.89735e+10	14517661300	10767567600	7325049750	4106160250
82	301	515000000000	1961183798200	842409622600	570360120700	3.96986e+11	306072904800	242151552850	2.00211e+11	161924008250	133650281650	111970115500	93590053900	7.52025e+10	60118128450	4.76651e+10	36471197900	27050230800	18401954250	10315475750
82	302	199000000000	757816652120	325513621160	220391580620	153398389820	118268947680	93569240810	7.73629e+10	62568694450	51643506890	43266122300	36163923740	2.90588e+10	23230111770	1.84181e+10	14092754140	10452419280	7110658050	3985979950
82	303	426000000000	1.63931e+12	744326425380	5.18716e+11	373249906740	293977015140	2.37211e+11	199128907500	163514421420	1.36662e+11	115645636380	97578980640	79261794300	6.39346e+10	51020516220	3.92718e+10	29268513180	1.99882e+10	1.12351e+10
82	304	326000000000	1.2545e+12	569601912380	3.96952e+11	285632557740	224968326140	1.81527e+11	152385032500	125130754420	1.04582e+11	88498773380	74673116640	60655739300	4.89265e+10	39043869220	3.00531e+10	22397970180	1.52961e+10	8597767520
82	305	18100000000	6.96516e+10	31625136853	2.20393e+10	15858740169	12490572709	1.00787e+10	8460641375	6947443727	5.80653e+09	4913582203	4145961384	3367695955	2716472073	2167773107	1.66859e+09	1243568283	8.49262e+08	4.77361e+08
82	306	0	0	0	0	0	0	0	0	0	0	0	0	0	0	0	0	0	0	0
82	307	0	0	0	0	0	0	0	0	0	0	0	0	0	0	0	0	0	0	0
82	308	0	0	0	0	0	0	0	0	0	0	0	0	0	0	0	0	0	0	0
82	309	98500000000	3.79043e+11	172103645305	1.19938e+11	86303088765	67973558665	5.4848e+10	46042716875	37807911995	3.1599e+10	26739660055	22562276040	18326964175	1.4783e+10	11796997295	9.08045e+09	6767484855	4.62168e+09	2.59779e+09
82	310	150000000000	580288894500	269899029000	190956592500	139296163500	111084150000	9.06563e+10	76766890500	63519694500	53421670500	45433629000	38516980500	31422063000	25430280000	2.03582e+10	15715948500	11740423500	8032908000	4521163500
82	311	457000000000	1767946831910	822292375020	581781085150	424388978130	338436377000	276199612640	233883126390	193523335910	162758022790	138421123020	1.17348e+11	95732551940	77477586400	6.20248e+10	47881256430	35769156930	24473593040	13774478130
82	312	597000000000	2309549800110	1074198135420	760007238150	554398730730	442114917000	3.60812e+11	305532224190	252808384110	212618248590	180825843420	153297582390	125059810740	101212514400	8.10258e+10	62549475030	46726885530	31970973840	17994230730
82	313	677000000000	2619037210510	1218144284220	861850754150	628690017930	501359797000	4.09162e+11	346474565790	286685554510	241109806190	205057112220	173839971990	141818244340	114775330400	9.18835e+10	70931314230	52988444730	36255191440	20405517930
82	314	869000000000	3361806995470	1563615041340	1106275192550	806989107210	643547509000	5.25202e+11	444736185630	367990763470	309489544430	263212157340	2.23142e+11	182038484980	147326088800	1.17942e+11	91047728310	68016186810	46537313680	26192607210
82	315	1570000000000	6.12375e+12	2973205617800	2.1543e+12	1609598273100	1304208734000	1.07986e+12	924551993400	7.7351e+11	656429622800	5.62666e+11	480540010800	395101380100	321842982100	258823292000	200633816800	150383611800	103168562200	58174889900
82	316	2230000000000	8.69806e+12	4223088234200	3.05993e+12	2286244680900	1.85247e+12	1.53382e+12	1313217162600	1.09868e+12	932380929200	7.99201e+11	682550461200	561194953900	4.5714e+11	367627988000	284976695200	2.13602e+11	146538785800	82630576100
82	317	2650000000000	1.03363e+13	5018468081000	3.63624e+12	2716837849500	2201371430000	1.82269e+12	1560549543000	1305606425500	1107986306000	9.49723e+11	811102566000	666890864500	5.43238e+11	436867340000	338649436000	2.53832e+11	174138019000	98193285500
82	318	3440000000000	1.34176e+13	6514539697600	4.72025e+12	3526763095200	2857629328000	2366064439200	2025769972800	1.69482e+12	1438291657600	1.23285e+12	1052902953600	865699839200	7.05185e+11	567103264000	439605305600	329502945600	226050862400	127466000800
82	319	4130000000000	1.6109e+13	7821235160200	5.66704e+12	4234166157900	3.43082e+12	2840652945900	2432101740600	2.03478e+12	1726786205200	1.48013e+12	1264095697200	1039343120900	8.46632e+11	680853628000	527781951200	3.95595e+11	271392459800	153033309100
82	320	4900000000000	1.91123e+13	9279431546000	6.72361e+12	5023586967000	4.07046e+12	3.37027e+12	2885544438000	2414140183000	2048729396000	1.75609e+12	1499774556000	1233118957000	1.00448e+12	807792440000	626181976000	4.6935e+11	321991054000	181564943000
82	321	5460000000000	2.12966e+13	10339938008400	7.49202e+12	5597711191800	4535655852000	3.75544e+12	3215320945200	2690041918200	2282869898400	1.95679e+12	1671177362400	1374046837800	1119275593800	900111576000	697745630400	5.2299e+11	358790031600	202315222200
82	322	8970000000000	3.49873e+13	16987041013800	1.23083e+13	9196239815100	7.45143e+12	6.16965e+12	5282312981400	4419354579900	3750429118800	3.21472e+12	2745505666800	2257362662100	1.83881e+12	1478754732000	1146296392800	8.59198e+11	589440766200	332375007900
82	323	15500000000000	6.04574e+13	29353303870000	2.12686e+13	15890938365000	12875946100000	10661046165000	9127742610000	7.63657e+12	6480674620000	5.55499e+12	4744184820000	3900682415000	3.17743e+12	2555261800000	1980779720000	1.48468e+12	1018543130000	574338085000
82	324	16400000000000	6.39678e+13	31057689256000	2.25035e+13	16813638012000	1.36236e+13	11280074652000	9657740568000	8.07998e+12	6856971856000	5.87753e+12	5019653616000	4127173652000	3.36193e+12	2703631840000	2095792736000	1.57089e+12	1077684344000	607686748000
82	325	18400000000000	7.17688e+13	34845212336000	2.52478e+13	18864081672000	1.5285e+13	1.26557e+13	10835513808000	9065342728000	7693187936000	6.59431e+12	5631806496000	4630487512000	3.77192e+12	3033343040000	2351377216000	1.76246e+12	1209109264000	681794888000
82	326	19800000000000	7.72294e+13	37496478492000	2.71689e+13	20299392234000	1.6448e+13	1.36186e+13	11659955076000	9755097066000	8278539192000	7.09605e+12	6060313512000	4982807214000	4.05891e+12	3264140880000	2530286352000	1.89656e+12	1301106708000	733670586000
82	327	19600000000000	7.64493e+13	37117726184000	2.68944e+13	20094347868000	1.62818e+13	1.34811e+13	11542177752000	9656560732000	8194917584000	7.02437e+12	5999098224000	4932475828000	4.01791e+12	3231169760000	2504727904000	1.8774e+12	1287964216000	726259772000
82	328	21200000000000	8.26901e+13	40147744648000	2.90899e+13	21734702796000	17610971440000	1.45816e+13	12484396344000	10444851404000	8863890448000	7.59779e+12	6488820528000	5335126916000	4.34591e+12	3494938720000	2709195488000	2.03066e+12	1393104152000	785546284000
82	329	23000000000000	8.97109e+13	43556515420000	3.15598e+13	23580102090000	19106242600000	1.58196e+13	13544392260000	11331678410000	9616484920000	8.24288e+12	7039758120000	5788109390000	4714897190000	3791678800000	2939221520000	2203072020000	1511386580000	852243610000
82	330	22000000000000	8.58105e+13	41662753880000	3.01876e+13	22554880260000	18275536400000	1.51318e+13	12955505640000	10838996740000	9198376880000	7.8845e+12	6733681680000	5536452460000	4509901660000	3626823200000	2811429280000	2.10729e+12	1445674120000	815189540000
82	331	22300000000000	8.69806e+13	42230882342000	3.05993e+13	22862446809000	18524748260000	1.53382e+13	13132171626000	10986801241000	9323809292000	7.99201e+12	6825504612000	5611949539000	4571400319000	3676279880000	2849766952000	2.13602e+12	1465387858000	826305761000
82	332	23100000000000	9.0101e+13	43745891574000	3.1697e+13	23682624273000	19189313220000	1.58884e+13	13603280922000	11380946577000	9658295724000	8.27872e+12	7070365764000	5813275083000	4735396743000	3808164360000	2952000744000	2212650594000	1517957826000	855949017000
82	333	23100000000000	9.0101e+13	43745891574000	3.1697e+13	23682624273000	19189313220000	1.58884e+13	13603280922000	11380946577000	9658295724000	8.27872e+12	7070365764000	5813275083000	4735396743000	3808164360000	2952000744000	2212650594000	1517957826000	855949017000
82	334	24000000000000	9.36114e+13	45450276960000	3.2932e+13	24605323920000	19936948800000	1.65074e+13	14133278880000	11824360080000	10034592960000	8.60127e+12	7345834560000	6039766320000	4919892720000	3956534400000	3067013760000	2298857760000	1577099040000	889297680000
82	335	23900000000000	95238367427000	50813714715000	39129381140000	31011118526000	2.62004e+13	2.25167e+13	19829226286000	1.70613e+13	14811876103000	1.29137e+13	11203159177000	9370681408000	7.73903e+12	6.29106e+12	4924660964000	3720390871000	2568309057000	1454548503000
82	336	22700000000000	90456524711000	48262398495000	37164726020000	29454074918000	2.48849e+13	21386113785000	18833616598000	1.62047e+13	14068183579000	1.22654e+13	10640657461000	8900186944000	7.35046e+12	5.97519e+12	4677397652000	3533593003000	2439356301000	1381516779000
82	337	23600000000000	94042906748000	50175885660000	38638217360000	30621857624000	2.58715e+13	2.2234e+13	19580323864000	1.68472e+13	14625952972000	1.27516e+13	11062533748000	9253057792000	7.64188e+12	6.21209e+12	4862845136000	3673691404000	2536070868000	1436290572000
82	338	25600000000000	102012644608000	54428079360000	41912642560000	33216930304000	2.8064e+13	2.41183e+13	21239673344000	18274874880000	15865440512000	1.38323e+13	12000036608000	10037215232000	8.2895e+12	6.73854e+12	5274950656000	3985021184000	2750992128000	1558010112000
82	339	26900000000000	107192974217000	5.7192e+13	44041018940000	34903727546000	2.94891e+13	2.5343e+13	22318250506000	19202895870000	16671107413000	1.45347e+13	12609413467000	10546917568000	8.71045e+12	7.08073e+12	5542819244000	4187385541000	2890690947000	1637127813000
82	340	27100000000000	107989948003000	5.76172e+13	44368461460000	35163234814000	2.97084e+13	2.55314e+13	22484185454000	19345668330000	16795056167000	1.46428e+13	12703163753000	10625333312000	8.77521e+12	7.13338e+12	5584029796000	4218518519000	2912183073000	1649299767000
82	341	27600000000000	109982382468000	5.86803e+13	45187067760000	35812002984000	3.02565e+13	2.60025e+13	22899022824000	19702599480000	17104928052000	1.49129e+13	12937539468000	10821372672000	8937119016000	7.26499e+12	5687056176000	4296350964000	2965913388000	1679729652000
82	342	28100000000000	111974816933000	5.97433e+13	46005674060000	36460771154000	3.08046e+13	2.64736e+13	23313860194000	20059530630000	17414799937000	1.51831e+13	13171915183000	11017412032000	9099023346000	7.3966e+12	5790082556000	4374183409000	3019643703000	1710159537000
82	343	26500000000000	105599026645000	5.63416e+13	43386133900000	34384713010000	2.90506e+13	2.49662e+13	21986380610000	18917350950000	16423209905000	1.43186e+13	12421912895000	10390086080000	8.58093e+12	6.97544e+12	5460398140000	4125119585000	2847706695000	1612783905000
82	344	26300000000000	104802052859000	5.59163e+13	43058691380000	34125205742000	2.88314e+13	2.47777e+13	21820445662000	18774578490000	16299261151000	1.42105e+13	12328162609000	10311670336000	8.51617e+12	6.9228e+12	5419187588000	4093986607000	2826214569000	1600611951000
82	345	27500000000000	109583895575000	5.84677e+13	45023346500000	35682249350000	3.01469e+13	2.59083e+13	22816055350000	19631213250000	17042953675000	1.48589e+13	12890664325000	10782164800000	8904738150000	7.23866e+12	5666450900000	4280784475000	2955167325000	1673643675000
82	346	27600000000000	109982382468000	5.86803e+13	45187067760000	35812002984000	3.02565e+13	2.60025e+13	22899022824000	19702599480000	17104928052000	1.49129e+13	12937539468000	10821372672000	8937119016000	7.26499e+12	5687056176000	4296350964000	2965913388000	1679729652000
82	347	27700000000000	110380869361000	5.88929e+13	45350789020000	35941756618000	3.03661e+13	2.60967e+13	22981990298000	19773985710000	17166902429000	1.4967e+13	12984414611000	10860580544000	8969499882000	7.29131e+12	5707661452000	4311917453000	2976659451000	1685815629000
82	348	27800000000000	110779356254000	5.91055e+13	45514510280000	36071510252000	3.04758e+13	2.61909e+13	23064957772000	19845371940000	17228876806000	1.5021e+13	13031289754000	10899788416000	9001880748000	7.31763e+12	5728266728000	4327483942000	2987405514000	1691901606000
82	349	27900000000000	111177843147000	5.93181e+13	45678231540000	36201263886000	3.05854e+13	2.62851e+13	23147925246000	19916758170000	17290851183000	1.5075e+13	13078164897000	10938996288000	9034261614000	7.34395e+12	5748872004000	4343050431000	2998151577000	1697987583000
82	350	0	0	0	0	0	0	0	0	0	0	0	0	0	0	0	0	0	0	0
81	280	0	0	0	0	0	0	0	0	0	0	0	0	0	0	0	0	0	0	0
81	281	0	0	0	0	0	0	0	0	0	0	0	0	0	0	0	0	0	0	0
81	282	0	0	0	0	0	0	0	0	0	0	0	0	0	0	0	0	0	0	0
81	283	0	0	0	0	0	0	0	0	0	0	0	0	0	0	0	0	0	0	0
81	284	0	0	0	0	0	0	0	0	0	0	0	0	0	0	0	0	0	0	0
81	285	0	0	0	0	0	0	0	0	0	0	0	0	0	0	0	0	0	0	0
81	286	0	0	0	0	0	0	0	0	0	0	0	0	0	0	0	0	0	0	0
81	287	0	0	0	0	0	0	0	0	0	0	0	0	0	0	0	0	0	0	0
81	288	0	0	0	0	0	0	0	0	0	0	0	0	0	0	0	0	0	0	0
81	289	0	0	0	0	0	0	0	0	0	0	0	0	0	0	0	0	0	0	0
81	290	0	0	0	0	0	0	0	0	0	0	0	0	0	0	0	0	0	0	0
81	291	181000000000	689270422280	296070178040	200456663780	139523158580	107571253920	85105691390	70365277640	56909214550	46972234910	39352603700	32892815060	2.64304e+10	21128895630	1.67522e+10	12818032660	9506974320	6467482950	3625439050
81	292	0	0	0	0	0	0	0	0	0	0	0	0	0	0	0	0	0	0	0
81	293	0	0	0	0	0	0	0	0	0	0	0	0	0	0	0	0	0	0	0
81	294	106000000000	403661131280	173389165040	117394510280	81709695080	62997529920	49840902140	4.12084e+10	33328048300	27508601660	23046276200	19263195560	1.54786e+10	12373828380	9.81067e+09	7506693160	5567620320	3787586700	2123185300
81	295	0	0	0	0	0	0	0	0	0	0	0	0	0	0	0	0	0	0	0
81	296	182000000000	693078546160	297705924880	201564159160	140294004760	108165570240	85575888580	70754036080	57223630100	47231750020	39570021400	33074543320	2.65764e+10	21245629860	1.68447e+10	12888850520	9559499040	6503214900	3645469100
81	297	0	0	0	0	0	0	0	0	0	0	0	0	0	0	0	0	0	0	0
81	298	217000000000	826362881960	354957064280	240326497460	167273621060	128966641440	102032790230	8.43606e+10	68228174350	56314778870	47179640900	39435032420	3.16873e+10	25331327910	2.00841e+10	15367475620	11397864240	7753833150	4346520850
81	299	102000000000	388428635760	166846177680	112964528760	78626310360	60620264640	47960113380	3.96534e+10	32070386100	26470541220	22176605400	18536282520	1.48945e+10	11906891460	9.44046e+09	7223421720	5357521440	3644658900	2043065100
81	300	216000000000	822554758080	353321317440	239219002080	166502774880	128372325120	101562593040	8.39718e+10	67913758800	56055263760	46962223200	39253304160	3.15412e+10	25214593680	1.99916e+10	15296657760	11345339520	7718101200	4326490800
81	301	523000000000	1991648789240	855495597320	579220083740	4.03153e+11	310827435360	245913130370	2.03321e+11	164439332650	135726402530	113709457100	95043879980	7.63707e+10	61052002290	4.84055e+10	37037740780	27470428560	18687809850	10475716150
81	302	232000000000	883484740160	379493266880	256938928160	178836313760	137881386240	109085748080	9.0192e+10	72944407600	60207505520	50440906400	42160956320	3.38776e+10	27082341360	2.14724e+10	16429743520	12185735040	8289812400	4646971600
81	303	436000000000	1.6778e+12	761798876680	5.30892e+11	382011641640	300877884040	2.42779e+11	203803295000	167352788120	1.3987e+11	118360322680	99869567040	81122399800	6.54355e+10	52218180920	4.01937e+10	29955567480	2.04574e+10	1.14989e+10
81	304	359000000000	1.38149e+12	627261001670	4.37134e+11	314546282910	247741193510	1.99903e+11	167810511250	137797364530	1.15168e+11	97457238170	82232051760	66795737450	5.38792e+10	42996162730	3.30952e+10	24665249370	1.68445e+10	9468093680
81	305	103000000000	3.9636e+11	179966248390	1.25417e+11	90245869470	71078949670	5.73538e+10	48146191250	39535177010	3.30427e+10	27961268890	23593039920	19164236650	1.54584e+10	12335946410	9.49529e+09	7076659290	4.83282e+09	2.71647e+09
81	306	0	0	0	0	0	0	0	0	0	0	0	0	0	0	0	0	0	0	0
81	307	0	0	0	0	0	0	0	0	0	0	0	0	0	0	0	0	0	0	0
81	308	0	0	0	0	0	0	0	0	0	0	0	0	0	0	0	0	0	0	0
81	309	303000000000	1.16599e+12	529415274390	3.68946e+11	265480567470	209096327670	1.6872e+11	141633941250	116302511010	9.72032e+10	82254994890	69404767920	56376346650	4.54746e+10	36289240410	2.79328e+10	20817745290	1.42169e+10	7.99118e+09
81	310	295000000000	1141234825850	530801423700	375547965250	2.73949e+11	218465495000	1.78291e+11	150974884650	124922065850	105062618650	89352803700	75750061650	61796723900	50012884000	4.00379e+10	30908032050	23089499550	15798052400	8891621550
81	311	597000000000	2309549800110	1074198135420	760007238150	554398730730	442114917000	3.60812e+11	305532224190	252808384110	212618248590	180825843420	153297582390	125059810740	101212514400	8.10258e+10	62549475030	46726885530	31970973840	17994230730
81	312	843000000000	3261223587090	1516832542980	1.07318e+12	782844438870	624292923000	5.09489e+11	431429924610	356980683090	300229788210	255336994980	2.16465e+11	176591994060	142918173600	1.14413e+11	88323630570	65981180070	45144942960	25408938870
81	313	1100000000000	4.25545e+12	1979259546000	1400348345000	1021505199000	814617100000	664813072000	562957197000	465811093000	391758917000	333179946000	282457857000	230428462000	186488720000	149293727000	115250289000	86096439000	58907992000	33155199000
81	314	1300000000000	5029170419000	2339124918000	1654957135000	1207233417000	962729300000	7.85688e+11	665313051000	550504019000	462987811000	393758118000	333813831000	272324546000	220395760000	1.76438e+11	136204887000	101750337000	69618536000	39183417000
81	315	2100000000000	8.191e+12	3976899234000	2.88155e+12	2152965843000	1.74448e+12	1444399803000	1236661902000	1.03463e+12	878026884000	7.52611e+11	642760524000	528479553000	4.30491e+11	346196760000	268363704000	2.0115e+11	137996166000	77813547000
81	316	2920000000000	1.13894e+13	5529783696800	4.00672e+12	2993647743600	2425662104000	2.0084e+12	1719548930400	1438630476400	1220875476800	1.04649e+12	893743204800	734838235600	598586947600	481378352000	373153340800	279694360800	191880383200	108197884400
81	317	3550000000000	1.38467e+13	6722853467000	4.87119e+12	3639537496500	2949007010000	2441723476500	2090547501000	1.74902e+12	1484283542000	1.27227e+12	1086571362000	893382101500	7.27734e+11	585237380000	453662452000	340039377000	233279233000	131541948500
81	318	4530000000000	1.76692e+13	8578739776200	6.21591e+12	4644254889900	3.7631e+12	3.11578e+12	2667656388600	2231847965100	1894029421200	1.62349e+12	1386526273200	1140005892900	9.2863e+11	746795868000	578898847200	4.33909e+11	297677443800	167854937100
81	319	5890000000000	2.29738e+13	11154255470600	8.08205e+12	6038556578700	4892859518000	4.0512e+12	3468542191800	2901895036300	2462656355600	2.11089e+12	1802790231600	1482259317700	1207423671700	970999484000	752696293600	564178008600	387046389400	218248472300
81	320	11700000000000	4.56356e+13	22157010018000	1.60543e+13	11995095411000	9719262540000	8.04737e+12	6889973454000	5764375539000	4891864068000	4.19312e+12	3581094348000	2944386081000	2398447701000	1928810520000	1495169208000	1120693158000	768835782000	433532619000
81	321	14700000000000	5.7337e+13	27838294638000	2.01708e+13	15070760901000	12211381140000	10110798621000	8656633314000	7.24242e+12	6146188188000	5.26828e+12	4499323668000	3699356871000	3.01343e+12	2423377320000	1878545928000	1408050378000	965973162000	544694829000
81	322	15900000000000	6.20176e+13	30110808486000	2.18174e+13	16301027097000	13208228580000	10936169937000	9363297258000	7.83364e+12	6647917836000	5.69834e+12	4866615396000	4001345187000	3.25943e+12	2621204040000	2031896616000	1.52299e+12	1044828114000	589159713000
81	323	17700000000000	6.90384e+13	33519579258000	2.42873e+13	18146426391000	1.47035e+13	1.21742e+13	10423293174000	8.72047e+12	7400512308000	6.34343e+12	5417552988000	4454327661000	3.62842e+12	2917944120000	2261922648000	1.69541e+12	1163110542000	655857039000
81	324	18900000000000	7.3719e+13	35792093106000	2.59339e+13	19376692587000	1.57003e+13	1.29996e+13	11129957118000	9311683563000	7902241956000	6.7735e+12	5784844716000	4756315977000	3.87442e+12	3115770840000	2415273336000	1.81035e+12	1241965494000	700321923000
81	325	21400000000000	8.34702e+13	40526496956000	2.93643e+13	21939747162000	17777112680000	1.47191e+13	12602173668000	10543387738000	8947512056000	7.66946e+12	6550035816000	5385458302000	4.3869e+12	3527909840000	2734753936000	2.04981e+12	1406246644000	792957098000
81	326	23200000000000	9.0491e+13	43935267728000	3.18342e+13	23785146456000	19272383840000	1.59572e+13	13662169584000	11430214744000	9700106528000	8.31456e+12	7100973408000	5838440776000	4755896296000	3824649920000	2964779968000	2222229168000	1524529072000	859654424000
81	327	22900000000000	8.93209e+13	43367139266000	3.14226e+13	23477579907000	19023171980000	1.57508e+13	13485503598000	11282410243000	9574674116000	8.20704e+12	7009150476000	5762943697000	4694397637000	3775193240000	2926442296000	2.19349e+12	1504815334000	848538203000
81	328	24900000000000	9.71218e+13	47154662346000	3.41669e+13	25528023567000	20684584380000	1.71265e+13	14663276838000	1.22678e+13	10410890196000	8.92382e+12	7621303356000	6266257557000	5104388697000	4104904440000	3182026776000	2385064926000	1636240254000	922646343000
81	329	27100000000000	1.05703e+14	51320937734000	3.71857e+13	27783511593000	22512138020000	18639635553000	15958827402000	1.33517e+13	11330727884000	9.71226e+12	8294671524000	6819902803000	5.55538e+12	4467586760000	3463169704000	2595793554000	1780807666000	1004165297000
81	330	26000000000000	1.01412e+14	49237800040000	3.56763e+13	26655767580000	21598361200000	17883045180000	15311052120000	1.28097e+13	10870809040000	9.31804e+12	7957987440000	6543080180000	5329883780000	4286245600000	3322598240000	2490429240000	1708523960000	963405820000
81	331	26300000000000	1.02583e+14	49805928502000	3.60879e+13	26963334129000	21847573060000	18089388009000	15487718106000	1.29575e+13	10996241452000	9.42556e+12	8049810372000	6618577259000	5.39138e+12	4335702280000	3360935912000	2519164962000	1728237698000	974522041000
81	332	27200000000000	1.06093e+14	51510313888000	3.73229e+13	27886033776000	22595208640000	18708416496000	16017716064000	1.34009e+13	11372538688000	9.7481e+12	8325279168000	6845068496000	5.57588e+12	4484072320000	3475948928000	2605372128000	1787378912000	1007870704000
81	333	27100000000000	1.05703e+14	51320937734000	3.71857e+13	27783511593000	22512138020000	18639635553000	15958827402000	1.33517e+13	11330727884000	9.71226e+12	8294671524000	6819902803000	5.55538e+12	4467586760000	3463169704000	2595793554000	1780807666000	1004165297000
81	334	28200000000000	1.09993e+14	53404075428000	3.8695e+13	28911255606000	23425914840000	19396225926000	16606602684000	1.38936e+13	11790646728000	1.01065e+13	8631355608000	7096725426000	5.78087e+12	4648927920000	3603741168000	2701157868000	1853091372000	1044924774000
81	335	28000000000000	111576330040000	5.95307e+13	45841952800000	36331017520000	3.0695e+13	2.63793e+13	23230892720000	19988144400000	17352825560000	1.51291e+13	13125040040000	10978204160000	9066642480000	7.37028e+12	5769477280000	4358616920000	3008897640000	1704073560000
81	336	26500000000000	105599026645000	5.63416e+13	43386133900000	34384713010000	2.90506e+13	2.49662e+13	21986380610000	18917350950000	16423209905000	1.43186e+13	12421912895000	10390086080000	8.58093e+12	6.97544e+12	5460398140000	4125119585000	2847706695000	1612783905000
81	337	27600000000000	109982382468000	5.86803e+13	45187067760000	35812002984000	3.02565e+13	2.60025e+13	22899022824000	19702599480000	17104928052000	1.49129e+13	12937539468000	10821372672000	8937119016000	7.26499e+12	5687056176000	4296350964000	2965913388000	1679729652000
81	338	30000000000000	119546067900000	6.37829e+13	49116378000000	38926090200000	3.28875e+13	2.82636e+13	24890242200000	21415869000000	18592313100000	1.62097e+13	14062542900000	11762361600000	9714259800000	7.89673e+12	6181582800000	4669946700000	3223818900000	1825793100000
81	339	31600000000000	125921858188000	6.71847e+13	51735918160000	41002148344000	3.46415e+13	2.9771e+13	26217721784000	22558048680000	19583903132000	1.70742e+13	1.48125e+13	12389687552000	10232353656000	8.31788e+12	6511267216000	4919010524000	3395755908000	1923168732000
81	340	31800000000000	1.26719e+14	6.76099e+13	52063360680000	41261655612000	3.48608e+13	2.99594e+13	26383656732000	22700821140000	19707851886000	1.71823e+13	1.49063e+13	12468103296000	10297115388000	8.37053e+12	6552477768000	4950143502000	3417248034000	1935340686000
81	341	32300000000000	1.28711e+14	6.86729e+13	52881966980000	41910423782000	3.54089e+13	3.04305e+13	26798494102000	23057752290000	20017723771000	1.74525e+13	1.51407e+13	12664142656000	10459019718000	8.50214e+12	6655504148000	5027975947000	3470978349000	1965770571000
81	342	32900000000000	1.31102e+14	6.99486e+13	53864294540000	42688945586000	3.60666e+13	3.09957e+13	27296298946000	23486069670000	20389570033000	1.77767e+13	1.54219e+13	12899389888000	10653304914000	8.66008e+12	6779135804000	5121374881000	3535454727000	2002286433000
81	343	30900000000000	123132449937000	6.56964e+13	50589869340000	40093872906000	3.38741e+13	2.91115e+13	25636949466000	22058345070000	19150082493000	1.6696e+13	14484419187000	12115232448000	10005687594000	8.13363e+12	6367030284000	4810045101000	3320533467000	1880566893000
81	344	30600000000000	121936989258000	6.50586e+13	50098705560000	39704612004000	3.35453e+13	2.88289e+13	25388047044000	21844186380000	18964159362000	1.65339e+13	14343793758000	11997608832000	9908544996000	8.05466e+12	6305214456000	4763345634000	3288295278000	1862308962000
81	345	32100000000000	1.27914e+14	6.82477e+13	52554524460000	41650916514000	3.51896e+13	3.0242e+13	26632559154000	22914979830000	19893775017000	1.73444e+13	1.50469e+13	12585726912000	10394257986000	8.4495e+12	6614293596000	4996842969000	3449486223000	1953598617000
81	346	32200000000000	1.28313e+14	6.84603e+13	52718245720000	41780670148000	3.52993e+13	3.03362e+13	26715526628000	22986366060000	19955749394000	1.73984e+13	1.50938e+13	12624934784000	10426638852000	8.47582e+12	6634898872000	5012409458000	3460232286000	1959684594000
81	347	32300000000000	1.28711e+14	6.86729e+13	52881966980000	41910423782000	3.54089e+13	3.04305e+13	26798494102000	23057752290000	20017723771000	1.74525e+13	1.51407e+13	12664142656000	10459019718000	8.50214e+12	6655504148000	5027975947000	3470978349000	1965770571000
81	348	32400000000000	1.2911e+14	6.88855e+13	53045688240000	42040177416000	3.55185e+13	3.05247e+13	26881461576000	23129138520000	20079698148000	1.75065e+13	1.51875e+13	12703350528000	10491400584000	8.52846e+12	6676109424000	5043542436000	3481724412000	1971856548000
81	349	32500000000000	1.29508e+14	6.90981e+13	53209409500000	42169931050000	3.56281e+13	3.06189e+13	26964429050000	23200524750000	20141672525000	1.75605e+13	1.52344e+13	12742558400000	10523781450000	8.55479e+12	6696714700000	5059108925000	3492470475000	1977942525000
81	350	0	0	0	0	0	0	0	0	0	0	0	0	0	0	0	0	0	0	0
80	280	0	0	0	0	0	0	0	0	0	0	0	0	0	0	0	0	0	0	0
80	281	0	0	0	0	0	0	0	0	0	0	0	0	0	0	0	0	0	0	0
80	282	0	0	0	0	0	0	0	0	0	0	0	0	0	0	0	0	0	0	0
80	283	0	0	0	0	0	0	0	0	0	0	0	0	0	0	0	0	0	0	0
80	284	0	0	0	0	0	0	0	0	0	0	0	0	0	0	0	0	0	0	0
80	285	0	0	0	0	0	0	0	0	0	0	0	0	0	0	0	0	0	0	0
80	286	0	0	0	0	0	0	0	0	0	0	0	0	0	0	0	0	0	0	0
80	287	0	0	0	0	0	0	0	0	0	0	0	0	0	0	0	0	0	0	0
80	288	0	0	0	0	0	0	0	0	0	0	0	0	0	0	0	0	0	0	0
80	289	0	0	0	0	0	0	0	0	0	0	0	0	0	0	0	0	0	0	0
80	290	0	0	0	0	0	0	0	0	0	0	0	0	0	0	0	0	0	0	0
80	291	251000000000	955839093880	410572456840	277981340380	1.93482e+11	149173396320	118019494690	9.75784e+10	78918303050	65138292610	54571842700	45613793260	3.66521e+10	29300291730	2.32309e+10	17775282860	13183704720	8968719450	5027542550
80	292	0	0	0	0	0	0	0	0	0	0	0	0	0	0	0	0	0	0	0
80	293	0	0	0	0	0	0	0	0	0	0	0	0	0	0	0	0	0	0	0
80	294	91400000000	348062522632	149507261176	101225077732	70455340852	54320511648	42976023166	35532521416	28737581270	23719681054	19871977780	16609962964	1.33466e+10	10669508622	8.45939e+09	6472752404	4800759408	3265900230	1830746570
80	295	0	0	0	0	0	0	0	0	0	0	0	0	0	0	0	0	0	0	0
80	296	188000000000	715927289440	307520405920	208209131440	144919081840	111731468160	88397071720	73086586720	59110123400	48788840680	40874527600	34164912880	2.74526e+10	21946035240	1.74001e+10	13313757680	9874647360	6717606600	3765649400
80	297	46800000000	178220197584	76552952112	51830783784	36075601224	27814003776	22005228492	18193894992	14714647740	12145307148	10175148360	8504882568	6.83393e+09	5463161964	4.3315e+09	3314275848	2458156896	1672255260	937406340
80	298	285000000000	1085315305800	466187849400	315636183300	2.19691e+11	169380151200	134006199150	1.10796e+11	89608431750	73961806350	61964044500	51792554100	4.16169e+10	33269255550	2.63777e+10	20183090100	14969545200	10183605750	5708564250
80	299	129000000000	491247980520	211011342360	142866904020	9.94392e+10	76666805280	60655437510	5.01498e+10	40559605950	33477449190	28046883300	23442945540	1.88371e+10	15058715670	1.19394e+10	9135503940	6775688880	4609421550	2583876450
80	300	272000000000	1035809695360	444923140480	301238743360	2.0967e+11	161654039040	127893635680	1.05742e+11	85521029600	70588109920	59137614400	49430086720	3.97186e+10	31751710560	2.51746e+10	19262457920	14286723840	9719090400	5448173600
80	301	464000000000	1766969480320	758986533760	513877856320	357672627520	275762772480	218171496160	1.80384e+11	145888815200	120415011040	100881812800	84321912640	6.77552e+10	54164682720	4.29448e+10	32859487040	24371470080	16579624800	9293943200
80	302	299000000000	1138629040120	489088305160	331141118620	2.30483e+11	177700579680	140588959810	1.16239e+11	94010249450	77595017890	65007892300	54336749740	4.36612e+10	34903534770	2.76735e+10	21174540140	15704891280	10683853050	5988984950
80	303	484000000000	1.86251e+12	845666642920	5.89339e+11	424067969160	334002054760	2.69507e+11	226240355000	185776948280	1.55268e+11	131390816920	110864381760	90053306200	72639363720	57966971480	4.46187e+10	33253428120	2.27096e+10	1.27648e+10
80	304	342000000000	1.31607e+12	597557834460	4.16434e+11	299651333580	236009716380	1.90437e+11	159864052500	131272141140	1.09714e+11	92842271460	78338054880	63632708100	5.13278e+10	40960132740	3.15281e+10	23497257060	1.60468e+10	9019743840
80	305	185000000000	7.11909e+11	323240349050	2.25264e+11	162092095650	127666074650	1.03014e+11	86476168750	71009783950	5.93485e+10	50221696550	42375848400	34421201750	2.7765e+10	22156796950	1.70547e+10	12710504550	8.68031e+09	4879101200
80	306	0	0	0	0	0	0	0	0	0	0	0	0	0	0	0	0	0	0	0
80	307	0	0	0	0	0	0	0	0	0	0	0	0	0	0	0	0	0	0	0
80	308	0	0	0	0	0	0	0	0	0	0	0	0	0	0	0	0	0	0	0
80	309	384000000000	1.47769e+12	670942129920	4.67575e+11	336450620160	264993365760	2.13824e+11	179496480000	147393281280	1.23188e+11	104243953920	87958517760	71447251200	5.76312e+10	45990324480	3.53999e+10	26382885120	1.80175e+10	10127431680
80	310	499000000000	1.93043e+12	897864103140	635248931050	463391903910	369539939000	301583384480	255377855730	211308850370	177716090530	151142539140	1.28133e+11	104530729580	84598064800	6.77251e+10	52281722010	39056475510	26722807280	15040403910
80	311	889000000000	3439178848070	1599601578540	1131736071550	825561929010	658358729000	5.3729e+11	454971771030	376460056070	316612433830	269269974540	2.28277e+11	186228093380	150716792800	1.20656e+11	93143188110	69581576610	47608368080	26795429010
80	312	1210000000000	4680997082300	2177185500600	1540383179500	1123655718900	896078810000	7.31294e+11	619252916700	512392202300	430934808700	366497940600	310703642700	253471308200	205137592000	1.64223e+11	126775317900	94706082900	64798791200	36470718900
80	313	1520000000000	5880260797600	2734976827200	1935026804000	1411534456800	1125652720000	9.18651e+11	777904490400	643666237600	541339594400	460394107200	3.90305e+11	318410238400	257693504000	2.06297e+11	159254944800	118969624800	81400134400	45814456800
80	314	1870000000000	7234268218100	3364741228200	2380592186500	1736558838300	1384849070000	1130182222400	957027234900	791878858100	665990158900	566405908200	4.80178e+11	391728385400	317030824000	2.53799e+11	195925491300	146363946300	100143586400	56363838300
80	315	2790000000000	1.08823e+13	5283594696600	3.82834e+12	2860368905700	2317670298000	1.91899e+12	1642993669800	1374581859300	1166521431600	9.99897e+11	853953267600	702122834700	571937528700	459947124000	356540349600	2.67242e+11	183337763400	103380855300
80	316	3810000000000	1.48608e+13	7215231467400	5.22795e+12	3906095172300	3164990622000	2620553928300	2243658022200	1.87712e+12	1592991632400	1.36545e+12	1166151236400	958812903300	7.81033e+11	628099836000	486888434400	3.64944e+11	250364472600	141176006700
80	317	4550000000000	1.77472e+13	8616615007000	6.24335e+12	4664759326500	3.77971e+12	3.12953e+12	2679434121000	2241701598500	1902391582000	1.63066e+12	1392647802000	1145039031500	9.3273e+11	750092980000	581454692000	4.35825e+11	298991693000	168596018500
80	318	6410000000000	2.5002e+13	12139011471400	8.79558e+12	6571671930300	5324826742000	4408858446300	3774763234200	3.15809e+12	2680072536400	2.29726e+12	1961949980400	1613120921300	1314021347300	1056724396000	819148258400	613986593400	421216868600	237516588700
80	319	12500000000000	4.87559e+13	23672019250000	1.71521e+13	12815272875000	10383827500000	8.59762e+12	7361082750000	6.15852e+12	5226350500000	4.47983e+12	3825955500000	3145711625000	2562444125000	2060695000000	1597403000000	1197321750000	821405750000	463175875000
80	320	17800000000000	6.94285e+13	33708955412000	2.44245e+13	18248948574000	1.47866e+13	1.2243e+13	10482181836000	8.76973e+12	7442323112000	6.37927e+12	5448160632000	4479493354000	3.64892e+12	2934429680000	2274701872000	1.70499e+12	1169681788000	659562446000
80	321	17400000000000	6.78683e+13	32951450796000	2.38757e+13	17838859842000	1.44543e+13	11967884082000	10246627188000	8.57266e+12	7275079896000	6.23592e+12	5325730056000	4378830582000	3.56692e+12	2868487440000	2223584976000	1.66667e+12	1143396804000	644740818000
80	322	17800000000000	6.94285e+13	33708955412000	2.44245e+13	18248948574000	1.47866e+13	1.2243e+13	10482181836000	8.76973e+12	7442323112000	6.37927e+12	5448160632000	4479493354000	3.64892e+12	2934429680000	2274701872000	1.70499e+12	1169681788000	659562446000
80	323	19900000000000	7.76195e+13	37685854646000	2.73061e+13	20401914417000	1.65311e+13	1.36874e+13	11718843738000	9804365233000	8320349996000	7.13188e+12	6090921156000	5007972907000	4.07941e+12	3280626440000	2543065576000	1.90614e+12	1307677954000	737375993000
80	324	21500000000000	8.38602e+13	40715873110000	2.95015e+13	22042269345000	17860183300000	1.47879e+13	12661062330000	10592655905000	8989322860000	7.7053e+12	6580643460000	5410623995000	4407403895000	3544395400000	2747533160000	2.05939e+12	1412817890000	796662505000
80	325	24500000000000	9.55617e+13	46397157730000	3.3618e+13	25117934835000	20352301900000	1.68513e+13	14427722190000	12070700915000	10243646980000	8.78046e+12	7498872780000	6165594785000	5022390485000	4038962200000	3130909880000	2346750630000	1609955270000	907824715000
80	326	26700000000000	1.04143e+14	50563433118000	3.66368e+13	27373422861000	22179855540000	18364511781000	15723272754000	1.31546e+13	11163484668000	9.56891e+12	8172240948000	6719240031000	5.47338e+12	4401644520000	3412052808000	2557479258000	1754522682000	989343669000
80	327	26400000000000	1.02973e+14	49995304656000	3.62252e+13	27065856312000	21930643680000	18158168952000	15546606768000	1.30068e+13	11038052256000	9.46139e+12	8080418016000	6643742952000	5.41188e+12	4352187840000	3373715136000	2528743536000	1734808944000	978227448000
80	328	28700000000000	1.11944e+14	54350956198000	3.93811e+13	29423866521000	23841267940000	19740130641000	16901045994000	1.414e+13	11999700748000	1.02857e+13	8784393828000	7222553891000	5.88337e+12	4731355720000	3667637288000	2749050738000	1885947602000	1063451809000
80	329	31300000000000	1.22085e+14	59274736202000	4.29488e+13	32089443279000	26001104060000	21528435159000	18432151206000	1.54209e+13	13086781652000	1.12175e+13	9580192572000	7876861909000	6.41636e+12	5159980280000	3999897112000	2.99809e+12	2056799998000	1159792391000
80	330	30000000000000	1.17014e+14	56812846200000	4.11649e+13	30756654900000	24921186000000	20634282900000	17666598600000	1.47805e+13	12543241200000	1.07516e+13	9182293200000	7549707900000	6.14987e+12	4945668000000	3833767200000	2873572200000	1971373800000	1111622100000
80	331	30300000000000	1.18184e+14	57380974662000	4.15766e+13	31064221449000	25170397860000	20840625729000	17843264586000	1.49283e+13	12668673612000	1.08591e+13	9274116132000	7625204979000	6.21136e+12	4995124680000	3872104872000	2.90231e+12	1991087538000	1122738321000
80	332	31300000000000	1.22085e+14	59274736202000	4.29488e+13	32089443279000	26001104060000	21528435159000	18432151206000	1.54209e+13	13086781652000	1.12175e+13	9580192572000	7876861909000	6.41636e+12	5159980280000	3999897112000	2.99809e+12	2056799998000	1159792391000
80	333	31200000000000	1.21695e+14	59085360048000	4.28115e+13	31986921096000	25918033440000	21459654216000	18373262544000	1.53717e+13	13044970848000	1.11816e+13	9549584928000	7851696216000	6.39586e+12	5143494720000	3987117888000	2.98852e+12	2050228752000	1156086984000
80	334	32500000000000	1.26765e+14	61547250050000	4.45954e+13	33319709475000	2.6998e+13	22353806475000	19138815150000	1.60122e+13	13588511300000	1.16475e+13	9947484300000	8178850225000	6.66235e+12	5357807000000	4153247800000	3.11304e+12	2135654950000	1204257275000
80	335	32100000000000	1.27914e+14	6.82477e+13	52554524460000	41650916514000	3.51896e+13	3.0242e+13	26632559154000	22914979830000	19893775017000	1.73444e+13	1.50469e+13	12585726912000	10394257986000	8.4495e+12	6614293596000	4996842969000	3449486223000	1953598617000
80	336	30400000000000	121140015472000	6.46333e+13	49771263040000	39445104736000	3.3326e+13	2.86404e+13	25222112096000	21701413920000	18840210608000	1.64259e+13	14250043472000	11919193088000	9843783264000	8.00202e+12	6264003904000	4732212656000	3266803152000	1850137008000
80	337	31700000000000	126320345081000	6.73973e+13	51899639420000	41131901978000	3.47511e+13	2.98652e+13	26300689258000	22629434910000	19645877509000	1.71283e+13	1.48594e+13	12428895424000	10264734522000	8.34421e+12	6531872492000	4934577013000	3406501971000	1929254709000
80	338	34500000000000	1.37478e+14	73350341325000	56483834700000	44765003730000	3.78206e+13	3.25031e+13	28623778530000	24628249350000	21381160065000	1.86412e+13	1.61719e+13	13526715840000	1.11714e+13	9.08123e+12	7108820220000	5370438705000	3707391735000	2099662065000
80	339	36300000000000	144650742159000	77177315655000	59430817380000	47100569142000	3.97939e+13	3.41989e+13	30117193062000	25913201490000	22496698851000	1.96138e+13	1.70157e+13	14232457536000	1.17543e+13	9.55504e+12	7479715188000	5650635507000	3900820869000	2209209651000
80	340	36500000000000	145447715945000	77602535025000	59758259900000	47360076410000	4.00132e+13	3.43874e+13	30283128010000	26055973950000	22620647605000	1.97218e+13	1.71094e+13	14310873280000	1.1819e+13	9.60768e+12	7520925740000	5681768485000	3922312995000	2221381605000
80	341	37000000000000	147440150410000	78665583450000	60576866200000	48008844580000	4.05613e+13	3.48584e+13	30697965380000	26412905100000	22930519490000	1.9992e+13	1.73438e+13	14506912640000	1.19809e+13	9.73929e+12	7623952120000	5759600930000	3976043310000	2251811490000
80	342	37700000000000	150229558661000	80153851245000	61722915020000	48917120018000	4.13287e+13	35517907035000	31278737698000	26912608710000	23364340129000	2.03702e+13	17671928911000	14781367744000	1.22076e+13	9.92355e+12	7768189052000	5868566353000	4051265751000	2294413329000
80	343	35300000000000	1.40666e+14	75051218805000	57793604780000	45803032802000	3.86976e+13	3.32568e+13	29287518322000	25199339190000	21876955081000	1.90734e+13	1.65469e+13	13840378816000	1.14304e+13	9.29181e+12	7273662428000	5494970617000	3793360239000	2148349881000
80	344	34900000000000	1.39072e+14	74200780065000	57138719740000	45284018266000	3.82591e+13	3.288e+13	28955648426000	24913794270000	21629057573000	1.88573e+13	1.63594e+13	13683547328000	1.13009e+13	9.18652e+12	7191241324000	5432704661000	3750375987000	2124005973000
80	345	36600000000000	145846202838000	77815144710000	59921981160000	47489830044000	4.01228e+13	3.44816e+13	30366095484000	26127360180000	22682621982000	1.97759e+13	1.71563e+13	14350081152000	1.18514e+13	9.634e+12	7541531016000	5697334974000	3933059058000	2227467582000
80	346	36700000000000	146244689731000	78027754395000	60085702420000	47619583678000	4.02324e+13	3.45758e+13	30449062958000	26198746410000	22744596359000	1.98299e+13	1.72032e+13	14389289024000	1.18838e+13	9.66033e+12	7562136292000	5712901463000	3943805121000	2233553559000
80	347	36900000000000	147041663517000	78452973765000	60413144940000	47879090946000	4.04517e+13	3.47642e+13	30614997906000	26341518870000	22868545113000	1.9938e+13	1.72969e+13	14467704768000	1.19485e+13	9.71297e+12	7603346844000	5744034441000	3965297247000	2245725513000
80	348	37000000000000	147440150410000	78665583450000	60576866200000	48008844580000	4.05613e+13	3.48584e+13	30697965380000	26412905100000	22930519490000	1.9992e+13	1.73438e+13	14506912640000	1.19809e+13	9.73929e+12	7623952120000	5759600930000	3976043310000	2251811490000
80	349	37100000000000	147838637303000	78878193135000	60740587460000	48138598214000	4.06709e+13	3.49526e+13	30780932854000	26484291330000	22992493867000	2.0046e+13	1.73907e+13	14546120512000	1.20133e+13	9.76562e+12	7644557396000	5775167419000	3986789373000	2257897467000
80	350	0	0	0	0	0	0	0	0	0	0	0	0	0	0	0	0	0	0	0
79	280	0	0	0	0	0	0	0	0	0	0	0	0	0	0	0	0	0	0	0
79	281	0	0	0	0	0	0	0	0	0	0	0	0	0	0	0	0	0	0	0
79	282	0	0	0	0	0	0	0	0	0	0	0	0	0	0	0	0	0	0	0
79	283	0	0	0	0	0	0	0	0	0	0	0	0	0	0	0	0	0	0	0
79	284	0	0	0	0	0	0	0	0	0	0	0	0	0	0	0	0	0	0	0
79	285	0	0	0	0	0	0	0	0	0	0	0	0	0	0	0	0	0	0	0
79	286	0	0	0	0	0	0	0	0	0	0	0	0	0	0	0	0	0	0	0
79	287	0	0	0	0	0	0	0	0	0	0	0	0	0	0	0	0	0	0	0
79	288	0	0	0	0	0	0	0	0	0	0	0	0	0	0	0	0	0	0	0
79	289	0	0	0	0	0	0	0	0	0	0	0	0	0	0	0	0	0	0	0
79	290	0	0	0	0	0	0	0	0	0	0	0	0	0	0	0	0	0	0	0
79	291	164000000000	624532316320	268262481760	181629242320	1.26419e+11	97467876480	77112339160	6.37564e+10	51564150200	42560478040	35656502800	29803434640	2.3948e+10	19144413720	1.51788e+10	11614129040	8614054080	5860039800	3284928200
79	292	0	0	0	0	0	0	0	0	0	0	0	0	0	0	0	0	0	0	0
79	293	0	0	0	0	0	0	0	0	0	0	0	0	0	0	0	0	0	0	0
79	294	108000000000	411277379040	176660658720	119609501040	83251387440	64186162560	50781296520	4.19859e+10	33956879400	28027631880	23481111600	19626652080	1.57706e+10	12607296840	9.99578e+09	7648328880	5672669760	3859050600	2163245400
79	295	0	0	0	0	0	0	0	0	0	0	0	0	0	0	0	0	0	0	0
79	296	225000000000	856827873000	368043039000	249186460500	173440390500	133721172000	105794367750	8.74706e+10	70743498750	58390899750	48918982500	40888858500	3.28554e+10	26265201750	2.08245e+10	15934018500	11818062000	8039688750	4506761250
79	297	56700000000	215920623996	92746845828	62794988046	43706978406	33697735344	26660180673	2.20426e+10	17827361685	14714506737	12327583590	10303992342	8.27957e+09	6618830841	5.24778e+09	4015372662	2978151624	2026001565	1135703835
79	298	173000000000	658805431240	282984203320	191596700740	1.33356e+11	102816723360	81344113870	6.72552e+10	54393890150	44896114030	37613262100	31438988980	2.52622e+10	20195021790	1.60118e+10	12251489780	9086776560	6181627350	3465198650
79	299	126000000000	479823608880	206104101840	139544417880	9.71266e+10	74883856320	59244845940	4.89836e+10	39616359300	32698903860	27394630200	22897760760	1.83991e+10	14708512980	1.16617e+10	8923050360	6618114720	4502225700	2523786300
79	300	104000000000	396044883520	170117671360	115179519520	80168002720	61808897280	48900507760	4.04309e+10	32699217200	26989571440	22611440800	18899739040	1.51865e+10	12140359920	9.62556e+09	7365057440	5462570880	3716122800	2083125200
79	301	416000000000	1584179534080	680470685440	460718078080	320672010880	247235589120	195602031040	1.61724e+11	130796868800	107958285760	90445763200	75598956160	6.07461e+10	48561439680	3.85023e+10	29460229760	21850283520	14864491200	8332500800
79	302	210000000000	799706014800	343506836400	232574029800	161877697800	124806427200	98741409900	8.16393e+10	66027265500	54498173100	45657717000	38162934600	3.06651e+10	24514188300	1.94362e+10	14871750600	11030191200	7503709500	4206310500
79	303	369000000000	1.41997e+12	644733452970	4.4931e+11	323308017810	254642062410	2.05471e+11	172484898750	141635731230	1.18376e+11	100171924470	84522638160	68656342950	5.538e+10	44193827430	3.40171e+10	25352303670	1.73137e+10	9731828880
79	304	313000000000	1.20447e+12	546887725690	3.81122e+11	274242302370	215997196570	1.74289e+11	146308328750	120140877710	1.00411e+11	84969681190	71695354320	58236952150	4.69755e+10	37486905110	2.88546e+10	21504799590	1.46861e+10	8.25491e+09
79	305	119000000000	4.57931e+11	207922170470	1.44899e+11	104264645310	82120339910	6.62631e+10	55625211250	45676563730	3.81755e+10	32304766970	27257978160	22141205450	17859678270	14252209930	1.09703e+10	8175946170	5.58355e+09	3.13845e+09
79	306	0	0	0	0	0	0	0	0	0	0	0	0	0	0	0	0	0	0	0
79	307	0	0	0	0	0	0	0	0	0	0	0	0	0	0	0	0	0	0	0
79	308	0	0	0	0	0	0	0	0	0	0	0	0	0	0	0	0	0	0	0
79	309	429000000000	1.65086e+12	749568160770	5.22369e+11	375878427210	296047275810	2.38881e+11	200531223750	164665931430	1.37624e+11	116460042270	98266156560	79819975950	6.43849e+10	51379815630	3.95484e+10	29474629470	2.01289e+10	1.13142e+10
79	310	614000000000	2375315874820	1104786692040	781648985300	570185629260	454704454000	3.71087e+11	314232471780	260007282820	218672704580	185974988040	157662840180	128620977880	104094612800	8.3333e+10	64330615860	48057466860	32881370080	18506629260
79	311	1040000000000	4.02334e+12	1871299934400	1323965708000	965786733600	770183440000	628550540800	532250440800	440403215200	370390248800	315006494400	2.67051e+11	217859636800	176316608000	141150432800	108963909600	81400269600	55694828800	31346733600
79	312	1530000000000	5918946723900	2752970095800	1947757243500	1420820867700	1133058330000	9.24695e+11	783022283100	647900883900	544901039100	463423015800	3.92873e+11	320505042600	259388856000	2.07654e+11	160302674700	119752319700	81935661600	46115867700
79	313	1910000000000	7389011923300	3436714302600	2431513944500	1773704481900	1414471510000	1154357243200	977498405700	808817443300	680235937700	578521542600	4.9045e+11	400107602200	323812232000	2.59228e+11	200116410900	149494725900	102285695200	57569481900
79	314	2510000000000	9710167501300	4516310418600	3195340314500	2330889135900	1858808110000	1.51698e+12	1284565967700	1062896221300	893922619700	760256058600	644517473700	525795854200	425533352000	3.40661e+11	262980204900	196456419900	134417327200	75654135900
79	315	3440000000000	1.34176e+13	6514539697600	4.72025e+12	3526763095200	2857629328000	2366064439200	2025769972800	1.69482e+12	1438291657600	1.23285e+12	1052902953600	865699839200	7.05185e+11	567103264000	439605305600	329502945600	226050862400	127466000800
79	316	4860000000000	1.89563e+13	9203681084400	6.66872e+12	4982578093800	4.03723e+12	3.34275e+12	2861988973200	2394432916200	2032005074400	1.74176e+12	1487531498400	1223052679800	9.96278e+11	801198216000	621070286400	4.65519e+11	319362555600	180082780200
79	317	6170000000000	2.40659e+13	11684508701800	8.46626e+12	6325618691100	5125457254000	4.24378e+12	3633430445400	3039845903900	2579726606800	2.21124e+12	1888491634800	1552723258100	1264822420100	1017159052000	788478120800	590998015800	405445878200	228623611900
79	318	14400000000000	5.61668e+13	27270166176000	1.97592e+13	14763194352000	11962169280000	9904455792000	8479967328000	7.09462e+12	6020755776000	5.16076e+12	4407500736000	3623859792000	2.95194e+12	2373920640000	1840208256000	1379314656000	946259424000	533578608000
79	319	18200000000000	7.09887e+13	34466460028000	2.49734e+13	18659037306000	1.51189e+13	1.25181e+13	10717736484000	8966806394000	7609566328000	6.52263e+12	5570591208000	4580156126000	3.73092e+12	3000371920000	2325818768000	1.7433e+12	1195966772000	674384074000
79	320	19400000000000	7.56692e+13	36738973876000	2.662e+13	19889303502000	1.61157e+13	1.33435e+13	11424400428000	9558024398000	8111295976000	6.95269e+12	5937882936000	4882144442000	3.97691e+12	3198198640000	2479169456000	1.85824e+12	1274821724000	718848958000
79	321	19500000000000	7.60593e+13	36928350030000	2.67572e+13	19991825685000	1.61988e+13	1.34123e+13	11483289090000	9607292565000	8153106780000	6.98853e+12	5968490580000	4907310135000	3.99741e+12	3214684200000	2491948680000	1.86782e+12	1281392970000	722554365000
79	322	19900000000000	7.76195e+13	37685854646000	2.73061e+13	20401914417000	1.65311e+13	1.36874e+13	11718843738000	9804365233000	8320349996000	7.13188e+12	6090921156000	5007972907000	4.07941e+12	3280626440000	2543065576000	1.90614e+12	1307677954000	737375993000
79	323	22400000000000	8.73707e+13	42420258496000	3.07365e+13	22964968992000	18607818880000	1.54069e+13	13191060288000	11036069408000	9365620096000	8.02785e+12	6856112256000	5637115232000	4591899872000	3692765440000	2862546176000	2.1456e+12	1471959104000	830011168000
79	324	24400000000000	9.51716e+13	46207781576000	3.34808e+13	25015412652000	20269231280000	1.67826e+13	14368833528000	12021432748000	10201836176000	8.74462e+12	7468265136000	6140429092000	5001890932000	4022476640000	3118130656000	2337172056000	1603384024000	904119308000
79	325	28000000000000	1.09213e+14	53025323120000	3.84206e+13	28706211240000	23259773600000	19258664040000	16488825360000	1.37951e+13	11707025120000	1.00348e+13	8570140320000	7046394040000	5.73987e+12	4615956800000	3578182720000	2682000720000	1839948880000	1037513960000
79	326	30600000000000	1.19355e+14	57949103124000	4.19882e+13	31371787998000	25419609720000	21046968558000	18019930572000	1.50761e+13	12794106024000	1.09666e+13	9365939064000	7700702058000	6.27286e+12	5044581360000	3910442544000	2.93104e+12	2010801276000	1133854542000
79	327	30300000000000	1.18184e+14	57380974662000	4.15766e+13	31064221449000	25170397860000	20840625729000	17843264586000	1.49283e+13	12668673612000	1.08591e+13	9274116132000	7625204979000	6.21136e+12	4995124680000	3872104872000	2.90231e+12	1991087538000	1122738321000
79	328	32900000000000	1.28326e+14	62304754666000	4.51442e+13	33729798207000	2.73302e+13	22628930247000	19374369798000	1.62092e+13	13755754516000	1.17909e+13	10069914876000	8279512997000	6.74435e+12	5423749240000	4204364696000	3.15135e+12	2161939934000	1219078903000
79	329	35900000000000	1.40027e+14	67986039286000	4.92607e+13	36805463697000	2.98224e+13	2.46924e+13	21141029658000	17687271953000	15010078636000	1.28661e+13	10988144196000	9034483787000	7.35934e+12	5918316040000	4587741416000	3.43871e+12	2359077314000	1330241113000
79	330	34500000000000	1.34566e+14	65334773130000	4.73397e+13	35370153135000	2.86594e+13	23729425335000	20316588390000	1.69975e+13	14424727380000	1.23643e+13	10559637180000	8682164085000	7.07235e+12	5687518200000	4408832280000	3.30461e+12	2267079870000	1278365415000
79	331	34800000000000	1.35737e+14	65902901592000	4.77513e+13	35677719684000	2.89086e+13	23935768164000	20493254376000	1.71453e+13	14550159792000	1.24718e+13	10651460112000	8757661164000	7.13384e+12	5736974880000	4447169952000	3.33334e+12	2286793608000	1289481636000
79	332	35800000000000	1.39637e+14	67796663132000	4.91235e+13	36702941514000	2.97393e+13	2.46236e+13	21082140996000	17638003786000	14968267832000	1.28302e+13	10957536552000	9009318094000	7.33884e+12	5901830480000	4574962192000	3.42913e+12	2352506068000	1326535706000
79	333	35800000000000	1.39637e+14	67796663132000	4.91235e+13	36702941514000	2.97393e+13	2.46236e+13	21082140996000	17638003786000	14968267832000	1.28302e+13	10957536552000	9009318094000	7.33884e+12	5901830480000	4574962192000	3.42913e+12	2352506068000	1326535706000
79	334	37200000000000	1.45098e+14	70447929288000	5.10445e+13	38138252076000	3.09023e+13	2.55865e+13	21906582264000	18327758124000	15553619088000	1.3332e+13	11386043568000	9361637796000	7.62583e+12	6132628320000	4753871328000	3.56323e+12	2444503512000	1378411404000
79	335	36600000000000	145846202838000	77815144710000	59921981160000	47489830044000	4.01228e+13	3.44816e+13	30366095484000	26127360180000	22682621982000	1.97759e+13	1.71563e+13	14350081152000	1.18514e+13	9.634e+12	7541531016000	5697334974000	3933059058000	2227467582000
79	336	34700000000000	1.38275e+14	73775560695000	56811277220000	45024510998000	3.80399e+13	3.26915e+13	28789713478000	24771021810000	21505108819000	1.87492e+13	1.62657e+13	13605131584000	1.12362e+13	9.13388e+12	7150030772000	5401571683000	3728883861000	2111834019000
79	337	36200000000000	144252255266000	76964705970000	59267096120000	46970815508000	3.96843e+13	3.41047e+13	30034225588000	25841815260000	22434724474000	1.95597e+13	1.69688e+13	14193249664000	1.17219e+13	9.52872e+12	7459109912000	5635069018000	3890074806000	2203123674000
79	338	39400000000000	157003835842000	83768215890000	64506176440000	51122931796000	4.31923e+13	37119510270000	32689184756000	2.81262e+13	24417904538000	2.12888e+13	18468806342000	15447901568000	1.27581e+13	1.0371e+13	8118478744000	6133196666000	4233948822000	2397874938000
79	339	41500000000000	165372060595000	88233019275000	67944322900000	53847758110000	4.54944e+13	39097961325000	34431501710000	2.96253e+13	25719366455000	2.24235e+13	19453184345000	16271266880000	1.34381e+13	1.09238e+13	8551189540000	6460092935000	4459616145000	2525680455000
79	340	41700000000000	166169034381000	88658238645000	68271765420000	54107265378000	4.57137e+13	39286385235000	34597436658000	2.97681e+13	25843315209000	2.25315e+13	19546934631000	16349682624000	1.35028e+13	1.09764e+13	8592400092000	6491225913000	4481108271000	2537852409000
79	341	42300000000000	168559955739000	89933896755000	69254092980000	54885787182000	4.63714e+13	39851656965000	35095241502000	3.01964e+13	26215161471000	2.28557e+13	19828185489000	16584929856000	1.36971e+13	1.11344e+13	8716031748000	6584624847000	4545584649000	2574368271000
79	342	43000000000000	171349363990000	91422164550000	70400141800000	55794062620000	4.71388e+13	40511140650000	35676013820000	3.06961e+13	26648982110000	2.32339e+13	20156311490000	16859384960000	1.39238e+13	1.13186e+13	8860268680000	6693590270000	4620807090000	2616970110000
79	343	40100000000000	159793244093000	85256483685000	65652225260000	52031207234000	4.39597e+13	37778993955000	33269957074000	2.86259e+13	24851725177000	2.1667e+13	18796932343000	15722356672000	1.29847e+13	1.05553e+13	8262715676000	6242162089000	4309171263000	2440476777000
79	344	39700000000000	158199296521000	84406044945000	64997340220000	51512192698000	4.35212e+13	37402146135000	32938087178000	2.83403e+13	24603827669000	2.14509e+13	18609431771000	15565525184000	1.28552e+13	1.045e+13	8180294572000	6179896133000	4266187011000	2416132869000
79	345	41700000000000	166169034381000	88658238645000	68271765420000	54107265378000	4.57137e+13	39286385235000	34597436658000	2.97681e+13	25843315209000	2.25315e+13	19546934631000	16349682624000	1.35028e+13	1.09764e+13	8592400092000	6491225913000	4481108271000	2537852409000
79	346	41800000000000	166567521274000	88870848330000	68435486680000	54237019012000	4.58233e+13	39380597190000	34680404132000	2.98394e+13	25905289586000	2.25855e+13	19593809774000	16388890496000	1.35352e+13	1.10028e+13	8613005368000	6506792402000	4491854334000	2543938386000
79	347	41900000000000	166966008167000	89083458015000	68599207940000	54366772646000	4.59329e+13	39474809145000	34763371606000	2.99108e+13	25967263963000	2.26396e+13	19640684917000	16428098368000	1.35676e+13	1.10291e+13	8633610644000	6522358891000	4502600397000	2550024363000
79	348	42000000000000	167364495060000	89296067700000	68762929200000	54496526280000	4.60425e+13	39569021100000	34846339080000	2.99822e+13	26029238340000	2.26936e+13	19687560060000	16467306240000	1.36e+13	1.10554e+13	8654215920000	6537925380000	4513346460000	2556110340000
79	349	42100000000000	167762981953000	89508677385000	68926650460000	54626279914000	4.61522e+13	39663233055000	34929306554000	3.00536e+13	26091212717000	2.27476e+13	19734435203000	16506514112000	1.36323e+13	1.10817e+13	8674821196000	6553491869000	4524092523000	2562196317000
79	350	0	0	0	0	0	0	0	0	0	0	0	0	0	0	0	0	0	0	0
78	280	0	0	0	0	0	0	0	0	0	0	0	0	0	0	0	0	0	0	0
78	281	0	0	0	0	0	0	0	0	0	0	0	0	0	0	0	0	0	0	0
78	282	0	0	0	0	0	0	0	0	0	0	0	0	0	0	0	0	0	0	0
78	283	0	0	0	0	0	0	0	0	0	0	0	0	0	0	0	0	0	0	0
78	284	0	0	0	0	0	0	0	0	0	0	0	0	0	0	0	0	0	0	0
78	285	0	0	0	0	0	0	0	0	0	0	0	0	0	0	0	0	0	0	0
78	286	0	0	0	0	0	0	0	0	0	0	0	0	0	0	0	0	0	0	0
78	287	0	0	0	0	0	0	0	0	0	0	0	0	0	0	0	0	0	0	0
78	288	0	0	0	0	0	0	0	0	0	0	0	0	0	0	0	0	0	0	0
78	289	0	0	0	0	0	0	0	0	0	0	0	0	0	0	0	0	0	0	0
78	290	0	0	0	0	0	0	0	0	0	0	0	0	0	0	0	0	0	0	0
78	291	158000000000	601683573040	258448000720	174984270040	1.21794e+11	93901978560	74291156020	6.14238e+10	49677656900	41003387380	34351996600	28713065080	2.30718e+10	18444008340	1.46235e+10	11189221880	8.29891e+09	5645648100	3164747900
78	292	0	0	0	0	0	0	0	0	0	0	0	0	0	0	0	0	0	0	0
78	293	0	0	0	0	0	0	0	0	0	0	0	0	0	0	0	0	0	0	0
78	294	91600000000	348824147408	149834410544	101446576808	70609510088	54439374912	43070062604	35610273104	28800464380	23771584076	19915461320	16646308616	1.33758e+10	10692855468	8.4779e+09	6486915976	4811264352	3273046620	1834752580
78	295	0	0	0	0	0	0	0	0	0	0	0	0	0	0	0	0	0	0	0
78	296	239000000000	910141607320	390943494760	264691395820	184232237020	142041600480	112377128410	9.29133e+10	75145316450	62024111290	51962830300	43433054140	3.48998e+10	27899480970	2.21203e+10	16925468540	12553408080	8539936050	4787181950
78	297	60700000000	231153119516	99289833188	67224969566	4.67904e+10	36075000624	28540969433	2.35976e+10	19085023885	15752567177	13197254390	11030905382	8.86367e+09	7085767761	5.618e+09	4298644102	3188250504	2168929365	1215824035
78	298	213000000000	811130386440	348414076920	235896515940	164190236340	126589376160	100152001470	8.28055e+10	66970512150	55276718430	46309970100	38708119380	3.11032e+10	24864390990	1.97139e+10	15084204180	11187765360	7610905350	4266400650
78	299	121000000000	460782989480	197925367640	134006940980	9.32724e+10	71912274720	56893859990	4.70398e+10	38044281550	31401328310	26307541700	21989119460	1.76689e+10	14124841830	1.1199e+10	8568961060	6355491120	4323565950	2423636050
78	300	234000000000	891100987920	382764760560	259153918920	180378006120	139070018880	110026142460	9.09695e+10	73573238700	60726535740	50875741800	42524412840	3.41697e+10	27315809820	2.16575e+10	16571379240	12290784480	8361276300	4687031700
78	301	533000000000	2029730028040	871853065720	590295037540	4.10861e+11	316770598560	250615102270	2.07208e+11	167583488150	138321553630	115883634100	96861162580	7.78309e+10	62219344590	4.9331e+10	37745919380	27995675760	19045129350	10676016650
78	302	185000000000	704502917800	302613165400	204886645300	142606543300	109948519200	86986480150	71920311400	58166876750	48010295350	40222274500	33619728100	2.70145e+10	21595832550	1.71224e+10	13101304100	9717073200	6610410750	3705559250
78	303	403000000000	1.55081e+12	704139787390	4.9071e+11	353097916470	278105016670	2.24404e+11	188377816250	154686178010	1.29283e+11	109401857890	92310631920	74982401650	6.04828e+10	48265887410	3.71515e+10	27688288290	1.8909e+10	1.06285e+10
78	304	312000000000	1.20062e+12	545140480560	3.79905e+11	273366128880	215307109680	1.73732e+11	145840890000	119757041040	1.0009e+11	84698212560	71466295680	58050891600	4.68254e+10	37367138640	2.87624e+10	21436094160	1.46392e+10	8.22854e+09
78	305	144000000000	5.54134e+11	251603298720	1.75341e+11	126168982560	99372512160	8.01839e+10	67311180000	55272480480	4.61956e+10	39091482720	32984444160	26792719200	21611711520	17246371680	1.3275e+10	9893581920	6.75656e+09	3.79779e+09
78	306	0	0	0	0	0	0	0	0	0	0	0	0	0	0	0	0	0	0	0
78	307	0	0	0	0	0	0	0	0	0	0	0	0	0	0	0	0	0	0	0
78	308	60900000000	2.34353e+11	106407228417	7.41544e+10	53358965541	42026291601	3.39111e+10	28467019875	23375653203	1.95369e+10	16532439567	13949671176	11331087495	9139952997	7293778023	5.61421e+09	4184160687	2.85746e+09	1.60615e+09
78	309	557000000000	2.14342e+12	973215537410	6.78227e+11	488028633930	384378397730	3.10156e+11	260363383750	213797025190	1.78687e+11	151208026910	127585662480	103635726350	83595300810	66709923790	5.13483e+10	38268924510	2.61348e+10	1.46901e+10
78	310	910000000000	3520419293300	1637387442600	1158469994500	845063391900	673910510000	549981723200	465719135700	385352813300	324091467700	275630682600	2.3367e+11	190627182200	154277032000	1.23507e+11	95343420900	71225235900	48732975200	27428391900
78	311	1470000000000	5686831166100	2645010484200	1871374606500	1365102402300	1088624670000	8.88432e+11	752315526900	622493006100	523532370900	445249564200	3.77466e+11	307936217400	249216744000	1.99511e+11	154016295300	115056150300	78722498400	44307402300
78	312	1930000000000	7466383775900	3472700839800	2456974823500	1792277303700	1429282730000	1166444753600	987733991100	817286735900	687358827100	584579359800	4.95585e+11	404297210600	327202936000	2.61943e+11	202211870700	151060115700	103356749600	58172303700
78	313	2620000000000	10135712690600	4714236373200	3335375149000	2433039655800	1940269820000	1.58346e+12	1340861687400	1109477330600	933098511400	793574053200	672763259400	548838700400	444182224000	3.55591e+11	274505233800	205066063800	140308126400	78969655800
78	314	3240000000000	12534240121200	5829819026400	4.12466e+12	3008797131600	2399417640000	1.95818e+12	1658164834800	1372025401200	1153908082800	981366386400	8.31967e+11	678716560800	549294048000	4.39738e+11	339464487600	253593147600	173510812800	97657131600
78	315	4540000000000	1.77082e+13	8597677391600	6.22963e+12	4654507108200	3.77141e+12	3.12265e+12	2673545254800	2236774781800	1898210501600	1.62707e+12	1389587037600	1142522462200	9.3068e+11	748444424000	580176769600	4.34867e+11	298334568400	168225477800
78	316	6610000000000	2.57821e+13	12517763779400	9.07001e+12	6776716296300	5490967982000	4546420332300	3892540558200	3.25663e+12	2763694144400	2.36893e+12	2023165268400	1663452307300	1.35502e+12	1089695516000	844706706400	633143741400	434359360600	244927402700
78	317	13800000000000	5.38266e+13	26133909252000	1.89359e+13	14148061254000	11463745560000	9491770134000	8126635356000	6.79901e+12	5769890952000	4.94573e+12	4223854872000	3472865634000	2.82894e+12	2275007280000	1763532912000	1321843212000	906831948000	511346166000
78	318	18600000000000	7.25488e+13	35223964644000	2.55223e+13	19069126038000	1.54511e+13	1.27933e+13	10953291132000	9163879062000	7776809544000	6.66598e+12	5693021784000	4680818898000	3.81292e+12	3066314160000	2376935664000	1.78161e+12	1222251756000	689205702000
78	319	19900000000000	7.76195e+13	37685854646000	2.73061e+13	20401914417000	1.65311e+13	1.36874e+13	11718843738000	9804365233000	8320349996000	7.13188e+12	6090921156000	5007972907000	4.07941e+12	3280626440000	2543065576000	1.90614e+12	1307677954000	737375993000
78	320	21500000000000	8.38602e+13	40715873110000	2.95015e+13	22042269345000	17860183300000	1.47879e+13	12661062330000	10592655905000	8989322860000	7.7053e+12	6580643460000	5410623995000	4407403895000	3544395400000	2747533160000	2.05939e+12	1412817890000	796662505000
78	321	21500000000000	8.38602e+13	40715873110000	2.95015e+13	22042269345000	17860183300000	1.47879e+13	12661062330000	10592655905000	8989322860000	7.7053e+12	6580643460000	5410623995000	4407403895000	3544395400000	2747533160000	2.05939e+12	1412817890000	796662505000
78	322	22000000000000	8.58105e+13	41662753880000	3.01876e+13	22554880260000	18275536400000	1.51318e+13	12955505640000	10838996740000	9198376880000	7.8845e+12	6733681680000	5536452460000	4509901660000	3626823200000	2811429280000	2.10729e+12	1445674120000	815189540000
78	323	24800000000000	9.67318e+13	46965286192000	3.40297e+13	25425501384000	20601513760000	1.70577e+13	14604388176000	1.22185e+13	10369079392000	8.88798e+12	7590695712000	6241091864000	5083889144000	4088418880000	3169247552000	2375486352000	1629669008000	918940936000
78	324	27200000000000	1.06093e+14	51510313888000	3.73229e+13	27886033776000	22595208640000	18708416496000	16017716064000	1.34009e+13	11372538688000	9.7481e+12	8325279168000	6845068496000	5.57588e+12	4484072320000	3475948928000	2605372128000	1787378912000	1007870704000
78	325	31300000000000	1.22085e+14	59274736202000	4.29488e+13	32089443279000	26001104060000	21528435159000	18432151206000	1.54209e+13	13086781652000	1.12175e+13	9580192572000	7876861909000	6.41636e+12	5159980280000	3999897112000	2.99809e+12	2056799998000	1159792391000
78	326	34300000000000	1.33786e+14	64956020822000	4.70653e+13	35165108769000	2.84932e+13	23591863449000	20198811066000	1.6899e+13	14341105772000	1.22926e+13	10498421892000	8631832699000	7.03135e+12	5654547080000	4383273832000	3.28545e+12	2253937378000	1270954601000
78	327	33900000000000	1.32226e+14	64198516206000	4.65164e+13	34755020037000	2.81609e+13	23316739677000	19963256418000	1.67019e+13	14173862556000	1.21493e+13	10375991316000	8531169927000	6.94935e+12	5588604840000	4332156936000	3.24714e+12	2227652394000	1256132973000
78	328	36900000000000	1.43928e+14	69879800826000	5.06329e+13	37830685527000	3.06531e+13	2.53802e+13	21729916278000	18179953623000	15428186676000	1.32244e+13	11294220636000	9286140717000	7.56434e+12	6083171640000	4715533656000	3.53449e+12	2424789774000	1367295183000
78	329	40200000000000	1.56799e+14	76129213908000	5.5161e+13	41213917566000	3.33944e+13	2.76499e+13	23673242124000	19805803134000	16807943208000	1.44071e+13	12304272888000	10116608586000	8.24082e+12	6627195120000	5137248048000	3.85059e+12	2641640892000	1489573614000
78	330	38700000000000	1.50948e+14	73288571598000	5.31028e+13	39676084821000	3.21483e+13	2.66182e+13	22789912194000	19066780629000	16180781148000	1.38695e+13	11845158228000	9739123191000	7.93333e+12	6379911720000	4945559688000	3.70691e+12	2543072202000	1433992509000
78	331	38900000000000	1.51729e+14	73667323906000	5.33772e+13	39881129187000	3.23145e+13	2.67558e+13	22907689518000	19165316963000	16264402756000	1.39412e+13	11906373516000	9789454577000	7.97433e+12	6412882840000	4971118136000	3.72607e+12	2556214694000	1441403323000
78	332	40000000000000	1.56019e+14	75750461600000	5.48866e+13	41008873200000	3.32282e+13	2.75124e+13	23555464800000	19707266800000	16724321600000	1.43354e+13	12243057600000	10066277200000	8.19982e+12	6594224000000	5111689600000	3.83143e+12	2628498400000	1482162800000
78	333	39900000000000	1.55629e+14	75561085446000	5.47494e+13	40906351017000	3.31452e+13	2.74436e+13	23496576138000	19657998633000	16682510796000	1.42996e+13	12212449956000	10041111507000	8.17932e+12	6577738440000	5098910376000	3.82185e+12	2621927154000	1478457393000
78	334	41400000000000	1.6148e+14	78401727756000	5.68076e+13	42444183762000	3.43912e+13	2.84753e+13	24379906068000	20397021138000	17309672856000	1.48372e+13	12671564616000	10418596902000	8.48681e+12	6825021840000	5290598736000	3.96553e+12	2720495844000	1534038498000
78	335	40700000000000	162184165451000	86532141795000	66634552820000	52809729038000	4.46174e+13	38344265685000	33767761918000	2.90542e+13	25223571439000	2.19912e+13	19078183201000	15957603904000	1.3179e+13	1.07132e+13	8386347332000	6335561023000	4373647641000	2476992639000
78	336	38600000000000	153815940698000	82067338410000	63196406360000	50084902724000	4.23153e+13	36365814630000	32025444964000	27555084780000	23922109522000	2.08565e+13	18093805198000	15134238592000	1.2499e+13	1.01605e+13	7953636536000	6008664754000	4147980318000	2349187122000
78	337	40300000000000	160590217879000	85681703055000	65979667780000	52290714502000	4.41789e+13	37967417865000	33435892022000	2.87687e+13	24975673931000	2.17751e+13	18890682629000	15800772416000	1.30495e+13	1.06079e+13	8303926228000	6273295067000	4330663389000	2452648731000
78	338	43800000000000	174537259134000	93123042030000	71709911880000	56832091692000	4.80158e+13	41264836290000	36339753612000	3.12672e+13	27144777126000	2.36662e+13	20531312634000	17173047936000	1.41828e+13	1.15292e+13	9025110888000	6818122182000	4706775594000	2665657926000
78	339	46200000000000	184100944566000	98225674470000	75639222120000	59946178908000	5.06468e+13	43525923210000	38330972988000	3.29804e+13	28632162174000	2.4963e+13	21656316066000	18114036864000	1.496e+13	1.2161e+13	9519637512000	7191717918000	4964681106000	2811721374000
78	340	46300000000000	184499431459000	98438284155000	75802943380000	60075932542000	5.07564e+13	43620135165000	38413940462000	3.30518e+13	28694136551000	2.5017e+13	21703191209000	18153244736000	1.49923e+13	1.21873e+13	9540242788000	7207284407000	4975427169000	2817807351000
78	341	46900000000000	186890352817000	99713942265000	76785270940000	60854454346000	5.14142e+13	44185406895000	38911745306000	3.34801e+13	29065982813000	2.53412e+13	21984442067000	18388491968000	1.51866e+13	1.23452e+13	9663874444000	7300683341000	5039903547000	2854323213000
78	342	47700000000000	190078247961000	101414819745000	78095041020000	61892483418000	5.22912e+13	4.49391e+13	39575485098000	3.40512e+13	29561777829000	2.57735e+13	22359443211000	18702154944000	1.54457e+13	1.25558e+13	9828716652000	7425215253000	5125872051000	2903011029000
78	343	44500000000000	177326667385000	94611309825000	72855960700000	57740367130000	4.87832e+13	41924319975000	36920525930000	3.17669e+13	27578597765000	2.40444e+13	20859438635000	17447503040000	1.44095e+13	1.17135e+13	9169347820000	6927087605000	4781998035000	2708259765000
78	344	44000000000000	175334232920000	93548261400000	72037354400000	57091598960000	4.8235e+13	41453260200000	36505688560000	3.14099e+13	27268725880000	2.37743e+13	20625062920000	17251463680000	1.42476e+13	1.15819e+13	9066321440000	6849255160000	4728267720000	2677829880000
78	345	46200000000000	184100944566000	98225674470000	75639222120000	59946178908000	5.06468e+13	43525923210000	38330972988000	3.29804e+13	28632162174000	2.4963e+13	21656316066000	18114036864000	1.496e+13	1.2161e+13	9519637512000	7191717918000	4964681106000	2811721374000
78	346	46300000000000	184499431459000	98438284155000	75802943380000	60075932542000	5.07564e+13	43620135165000	38413940462000	3.30518e+13	28694136551000	2.5017e+13	21703191209000	18153244736000	1.49923e+13	1.21873e+13	9540242788000	7207284407000	4975427169000	2817807351000
78	347	46500000000000	185296405245000	98863503525000	76130385900000	60335439810000	5.09757e+13	43808559075000	38579875410000	3.31946e+13	28818085305000	2.51251e+13	21796941495000	18231660480000	1.50571e+13	1.22399e+13	9581453340000	7238417385000	4996919295000	2829979305000
78	348	46600000000000	185694892138000	99076113210000	76294107160000	60465193444000	5.10853e+13	43902771030000	38662842884000	3.3266e+13	28880059682000	2.51791e+13	21843816638000	18270868352000	1.50895e+13	1.22662e+13	9602058616000	7253983874000	5007665358000	2836065282000
78	349	46700000000000	186093379031000	99288722895000	76457828420000	60594947078000	5.11949e+13	43996982985000	38745810358000	3.33374e+13	28942034059000	2.52331e+13	21890691781000	18310076224000	1.51219e+13	1.22926e+13	9622663892000	7269550363000	5018411421000	2842151259000
78	350	0	0	0	0	0	0	0	0	0	0	0	0	0	0	0	0	0	0	0
77	280	0	0	0	0	0	0	0	0	0	0	0	0	0	0	0	0	0	0	0
77	281	0	0	0	0	0	0	0	0	0	0	0	0	0	0	0	0	0	0	0
77	282	0	0	0	0	0	0	0	0	0	0	0	0	0	0	0	0	0	0	0
77	283	0	0	0	0	0	0	0	0	0	0	0	0	0	0	0	0	0	0	0
77	284	0	0	0	0	0	0	0	0	0	0	0	0	0	0	0	0	0	0	0
77	285	0	0	0	0	0	0	0	0	0	0	0	0	0	0	0	0	0	0	0
77	286	0	0	0	0	0	0	0	0	0	0	0	0	0	0	0	0	0	0	0
77	287	0	0	0	0	0	0	0	0	0	0	0	0	0	0	0	0	0	0	0
77	288	0	0	0	0	0	0	0	0	0	0	0	0	0	0	0	0	0	0	0
77	289	0	0	0	0	0	0	0	0	0	0	0	0	0	0	0	0	0	0	0
77	290	0	0	0	0	0	0	0	0	0	0	0	0	0	0	0	0	0	0	0
77	291	160000000000	609299820800	261719494400	177199260800	1.23335e+11	95090611200	75231550400	6.22014e+10	50306488000	41522417600	34786832000	29076521600	2.33639e+10	18677476800	1.48086e+10	11330857600	8.40396e+09	5717112000	3204808000
77	292	0	0	0	0	0	0	0	0	0	0	0	0	0	0	0	0	0	0	0
77	293	0	0	0	0	0	0	0	0	0	0	0	0	0	0	0	0	0	0	0
77	294	87400000000	332830027112	142964273816	96795096212	6.7372e+10	51943246368	41095234406	3.39775e+10	27479919070	22681620614	19002306980	15883049924	1.27625e+10	10202571702	8.08918e+09	6189480964	4590660528	3122972430	1750626370
77	295	0	0	0	0	0	0	0	0	0	0	0	0	0	0	0	0	0	0	0
77	296	191000000000	727351661080	312427646440	211531617580	147231620380	113514417120	89807663290	74252862040	60053370050	49567386010	41526780700	34710097660	2.78906e+10	22296237930	1.76777e+10	13526211260	10032221520	6824802450	3825739550
77	297	0	0	0	0	0	0	0	0	0	0	0	0	0	0	0	0	0	0	0
77	298	209000000000	795897890920	341871089560	231466534420	161106851620	124212110880	98271212710	8.12505e+10	65712849950	54238657990	45440299300	37981206340	3.05191e+10	24397454070	1.93437e+10	14800932740	10977666480	7467977550	4186280450
77	299	122000000000	464591113360	199561114480	135114436360	9.40432e+10	72506591040	57364057180	4.74285e+10	38358697100	31660843420	26524959400	22170847720	1.7815e+10	14241576060	1.12915e+10	8639778920	6408015840	4359297900	2443666100
77	300	172000000000	654997307360	281348456480	190489205360	1.32586e+11	102222407040	80873916680	6.68665e+10	54079474600	44636598920	37395844400	31257260720	2.51162e+10	20078287560	1.59192e+10	12180671920	9034251840	6145895400	3445168600
77	301	522000000000	1987840665360	853859850480	578112588360	4.02382e+11	310233119040	245442933180	2.02932e+11	164124917100	135466887420	113492039400	94862151720	7.62246e+10	60935268060	4.83129e+10	36966922920	27417903840	18652077900	10455686100
77	302	275000000000	1047234067000	449830381000	304561229500	2.11983e+11	163436988000	129304227250	1.06909e+11	86464276250	71366655250	59789867500	49975271500	4.01567e+10	32101913250	2.54522e+10	19474911500	14444298000	9826286250	5508263750
77	303	368000000000	1.41612e+12	642986207840	4.48093e+11	322431844320	253951975520	2.04914e+11	172017460000	141251894560	1.18055e+11	99900455840	84293579520	68470282400	5.52299e+10	44074060960	3.39249e+10	25283598240	1.72668e+10	9705455360
77	304	320000000000	1.23141e+12	559118441600	3.89646e+11	280375516800	220827804800	1.78186e+11	149580400000	122827734400	1.02657e+11	86869961600	73298764800	59539376000	4.8026e+10	38325270400	2.94999e+10	21985737600	1.50146e+10	8.43953e+09
77	305	91700000000	3.52876e+11	160222378421	1.11658e+11	80345109033	63280967813	5.10616e+10	42864133375	35197822639	2.94176e+10	24893673371	21004677288	17061752435	1.37625e+10	10982585299	8.45358e+09	6300287931	4.30262e+09	2418451784
77	306	0	0	0	0	0	0	0	0	0	0	0	0	0	0	0	0	0	0	0
77	307	46300000000	1.7817e+11	80897449519	5.63769e+10	40566832587	31951023007	2.57814e+10	21642414125	17771637821	1.48532e+10	12568997569	10605415032	8614603465	6.94877e+09	5545187561	4.26827e+09	3181061409	2.17242e+09	1221093976
77	308	97700000000	3.75965e+11	170705849201	1.18964e+11	85602149973	67421489153	5.44026e+10	45668765875	37500842659	3.13424e+10	26522485151	22379029128	18178115735	1.46629e+10	11701184119	9.0067e+09	6712520511	4.58414e+09	2.57669e+09
77	309	804000000000	3.09392e+12	1404785084520	9.78985e+11	704443485960	554829859560	4.47694e+11	375820755000	308604682680	2.57925e+11	218260778520	184163146560	149592682200	1.20665e+11	96292241880	7.41186e+10	55239165720	3.77241e+10	2.12043e+10
77	310	1200000000000	4642311156000	2159192232000	1527652740000	1114369308000	888673200000	7.25251e+11	614135124000	508157556000	427373364000	363469032000	308135844000	251376504000	203442240000	1.62866e+11	125727588000	93923388000	64263264000	36169308000
77	311	1830000000000	7079524512900	3292768153800	2329670428500	1699413194700	1355226630000	1106007201600	936556064100	774940272900	651744380100	554290273800	4.69907e+11	383349168600	310249416000	2.4837e+11	191734571700	143233166700	98001477600	55158194700
77	312	2480000000000	9594109722400	4462330612800	3157148996000	2303029903200	1836591280000	1.49885e+12	1269212589600	1050192282400	883238285600	751169332800	636814077600	519511441600	420447296000	3.36589e+11	259837015200	194108335200	132810745600	74749903200
77	313	3250000000000	12572926047500	5847812295000	4.13739e+12	3018083542500	2406823250000	1.96422e+12	1663282627500	1376260047500	1157469527500	984395295000	8.34535e+11	680811365000	550989400000	4.41095e+11	340512217500	254375842500	174046340000	97958542500
77	314	4160000000000	1.60933e+13	7485199737600	5295862832000	3863146934400	3080733760000	2514202163200	2129001763200	1761612860800	1481560995200	1260025977600	1.0682e+12	871438547200	705266432000	564601731200	435855638400	325601078400	222779315200	125386934400
77	315	4910000000000	1.91513e+13	9298369161400	6.73733e+12	5033839185300	4.07877e+12	3.37714e+12	2891433304200	2419066999700	2052910476400	1.75968e+12	1502835320400	1235635526300	1.00653e+12	809440996000	627459898400	4.70308e+11	322648178600	181935483700
77	316	14100000000000	5.49967e+13	26702037714000	1.93475e+13	14455627803000	11712957420000	9698112963000	8303301342000	6.94681e+12	5895323364000	5.05324e+12	4315677804000	3548362713000	2.89044e+12	2324463960000	1801870584000	1350578934000	926545686000	522462387000
77	317	19000000000000	7.4109e+13	35981469260000	2.60711e+13	19479214770000	1.57834e+13	1.30684e+13	11188845780000	9360951730000	7944052760000	6.80934e+12	5815452360000	4781481670000	3.89492e+12	3132256400000	2428052560000	1.81993e+12	1248536740000	704027330000
77	318	20300000000000	7.91797e+13	38443359262000	2.78549e+13	20812003149000	1.68633e+13	1.39625e+13	11954398386000	10001437901000	8487593212000	7.27524e+12	6213351732000	5108635679000	4.16141e+12	3346568680000	2594182472000	1.94445e+12	1333962938000	752197621000
77	319	21800000000000	8.50304e+13	41284001572000	2.99132e+13	22349835894000	18109395160000	1.49942e+13	12837728316000	10740460406000	9114755272000	7.81282e+12	6672466392000	5486121074000	4468902554000	3593852080000	2785870832000	2.08813e+12	1432531628000	807778726000
77	320	23600000000000	9.20512e+13	44692772344000	3.23831e+13	24195235188000	19604666320000	1.62323e+13	13897724232000	11627287412000	9867349744000	8.45791e+12	7223403984000	5939103548000	4837894508000	3890592160000	3015896864000	2260543464000	1550814056000	874476052000
77	321	23600000000000	9.20512e+13	44692772344000	3.23831e+13	24195235188000	19604666320000	1.62323e+13	13897724232000	11627287412000	9867349744000	8.45791e+12	7223403984000	5939103548000	4837894508000	3890592160000	3015896864000	2260543464000	1550814056000	874476052000
77	322	24200000000000	9.43915e+13	45829029268000	3.32064e+13	24810368286000	20103090040000	1.6645e+13	14251056204000	11922896414000	10118214568000	8.67294e+12	7407049848000	6090097706000	4960891826000	3989505520000	3092572208000	2318014908000	1590241532000	896708494000
77	323	27300000000000	1.06483e+14	51699690042000	3.74601e+13	27988555959000	22678279260000	18777197439000	16076604726000	1.34502e+13	11414349492000	9.78394e+12	8355886812000	6870234189000	5.59638e+12	4500557880000	3488728152000	2614950702000	1793950158000	1011576111000
77	324	30100000000000	1.17404e+14	57002222354000	4.13022e+13	30859177083000	25004256620000	20703063843000	17725487262000	1.48297e+13	12585052004000	1.07874e+13	9212900844000	7574873593000	6.17037e+12	4962153560000	3846546424000	2883150774000	1977945046000	1115327507000
77	325	34800000000000	1.35737e+14	65902901592000	4.77513e+13	35677719684000	2.89086e+13	23935768164000	20493254376000	1.71453e+13	14550159792000	1.24718e+13	10651460112000	8757661164000	7.13384e+12	5736974880000	4447169952000	3.33334e+12	2286793608000	1289481636000
77	326	38100000000000	1.48608e+14	72152314674000	5.22795e+13	39060951723000	3.16499e+13	2.62055e+13	22436580222000	18771171627000	15929916324000	1.36545e+13	11661512364000	9588129033000	7.81033e+12	6280998360000	4868884344000	3.64944e+12	2503644726000	1411760067000
77	327	37700000000000	1.47048e+14	71394810058000	5.17306e+13	38650862991000	3.13176e+13	2.59304e+13	22201025574000	18574098959000	15762673108000	1.35112e+13	11539081788000	9487466261000	7.72833e+12	6215056120000	4817767448000	3.61112e+12	2477359742000	1396938439000
77	328	40900000000000	1.59529e+14	77454846986000	5.61215e+13	41931572847000	3.39759e+13	2.81314e+13	24085462758000	20150680303000	17100618836000	1.4658e+13	12518526396000	10292768437000	8.38432e+12	6742594040000	5226702616000	3.91764e+12	2687639614000	1515511463000
77	329	44600000000000	1.73961e+14	84461764684000	6.11985e+13	45724893618000	37049496520000	3.06763e+13	26264343252000	21973602482000	18647618584000	1.5984e+13	13651009224000	11223899078000	9142800638000	7352559760000	5699533904000	4.27204e+12	2930775716000	1652611522000
77	330	42900000000000	1.6733e+14	81242370066000	5.88659e+13	43982016507000	35637295980000	2.9507e+13	25263235998000	21136043643000	17936834916000	1.53748e+13	13130679276000	10796082297000	8.79431e+12	7072305240000	5482287096000	4.10921e+12	2819064534000	1589619603000
77	331	43100000000000	1.68111e+14	81621122374000	5.91403e+13	44187060873000	35803437220000	2.96446e+13	25381013322000	21234579977000	18020456524000	1.54464e+13	13191894564000	10846413683000	8835307343000	7105276360000	5507845544000	4.12837e+12	2832207026000	1597030417000
77	332	44200000000000	1.72401e+14	83704260068000	6.06497e+13	45314804886000	36717214040000	3.04012e+13	26028788604000	21776529814000	18480375368000	1.58407e+13	13528578648000	11123236306000	9060802426000	7286617520000	5648417008000	4.23373e+12	2904490732000	1637789894000
77	333	44100000000000	1.72011e+14	83514883914000	6.05125e+13	45212282703000	36634143420000	3.03324e+13	25969899942000	21727261647000	18438564564000	1.58048e+13	13497971004000	11098070613000	9040302873000	7270131960000	5635637784000	4.22415e+12	2897919486000	1634084487000
77	334	45800000000000	1.78642e+14	86734278532000	6.28451e+13	46955159814000	38046343960000	3.15017e+13	26971007196000	22564820486000	19149348232000	1.64141e+13	14018300952000	11525887394000	9388795274000	7550386480000	5852884592000	4.38699e+12	3009630668000	1697076406000
77	335	44900000000000	178920614957000	95461748565000	73510845740000	58259381666000	4.92217e+13	42301167795000	37252395826000	3.20524e+13	27826495273000	2.42606e+13	21046939207000	17604334528000	1.4539e+13	1.18188e+13	9251768924000	6989353561000	4824982287000	2732603673000
77	336	42500000000000	169356929525000	90359116125000	69581535500000	55145294450000	4.65907e+13	40040080875000	35261176450000	3.03391e+13	26339110225000	2.29638e+13	19921935775000	16663345600000	1.37619e+13	1.1187e+13	8757242300000	6615757825000	4567076775000	2586540225000
77	337	44400000000000	176928180492000	94398700140000	72692239440000	57610613496000	4.86735e+13	41830108020000	36837558456000	3.16955e+13	27516623388000	2.39904e+13	20812563492000	17408295168000	1.43771e+13	1.16872e+13	9148742544000	6911521116000	4771251972000	2702173788000
77	338	48300000000000	192469169319000	102690477855000	79077368580000	62671005222000	5.29489e+13	4.55044e+13	40073289942000	3.44795e+13	29933624091000	2.60977e+13	22640694069000	18937402176000	1.564e+13	1.27137e+13	9952348308000	7518614187000	5190348429000	2939526891000
77	339	50900000000000	202829828537000	108218329665000	83334121340000	66044599706000	5.57992e+13	4.79539e+13	42230444266000	36335591070000	31544957893000	2.75025e+13	23859447787000	19956806848000	1.64819e+13	1.33981e+13	10488085484000	7923342901000	5469746067000	3097762293000
77	340	51100000000000	203626802323000	108643549035000	83661563860000	66304106974000	5.60184e+13	4.81423e+13	42396379214000	36478363530000	31668906647000	2.76106e+13	23953198073000	20035222592000	1.65466e+13	1.34508e+13	10529296036000	7954475879000	5491238193000	3109934247000
77	341	51700000000000	206017723681000	109919207145000	84643891420000	67082628778000	5.66762e+13	4.87076e+13	42894184058000	36906680910000	32040752909000	2.79348e+13	24234448931000	20270469824000	1.67409e+13	1.36087e+13	10652927692000	8047874813000	5555714571000	3146450109000
77	342	52500000000000	209205618825000	1.1162e+14	85953661500000	68120657850000	5.75532e+13	4.94613e+13	43557923850000	37477770750000	32536547925000	2.8367e+13	24609450075000	20584132800000	1.7e+13	1.38193e+13	10817769900000	8172406725000	5641683075000	3195137925000
77	343	48900000000000	194860090677000	103966135965000	80059696140000	63449527026000	5.36067e+13	4.60696e+13	40571094786000	3.49079e+13	30305470353000	2.64219e+13	22921944927000	19172649408000	1.58342e+13	1.28717e+13	10075979964000	7612013121000	5254824807000	2976042753000
77	344	48300000000000	192469169319000	102690477855000	79077368580000	62671005222000	5.29489e+13	4.55044e+13	40073289942000	3.44795e+13	29933624091000	2.60977e+13	22640694069000	18937402176000	1.564e+13	1.27137e+13	9952348308000	7518614187000	5190348429000	2939526891000
77	345	50800000000000	202431341644000	108005719980000	83170400080000	65914846072000	5.56895e+13	4.78597e+13	42147476792000	36264204840000	31482983516000	2.74485e+13	23812572644000	19917598976000	1.64495e+13	1.33718e+13	10467480208000	7907776412000	5459000004000	3091676316000
77	346	50900000000000	202829828537000	108218329665000	83334121340000	66044599706000	5.57992e+13	4.79539e+13	42230444266000	36335591070000	31544957893000	2.75025e+13	23859447787000	19956806848000	1.64819e+13	1.33981e+13	10488085484000	7923342901000	5469746067000	3097762293000
77	347	51100000000000	203626802323000	108643549035000	83661563860000	66304106974000	5.60184e+13	4.81423e+13	42396379214000	36478363530000	31668906647000	2.76106e+13	23953198073000	20035222592000	1.65466e+13	1.34508e+13	10529296036000	7954475879000	5491238193000	3109934247000
77	348	51200000000000	204025289216000	108856158720000	83825285120000	66433860608000	5.6128e+13	4.82365e+13	42479346688000	36549749760000	31730881024000	2.76646e+13	24000073216000	20074430464000	1.6579e+13	1.34771e+13	10549901312000	7970042368000	5501984256000	3116020224000
77	349	51400000000000	204822263002000	109281378090000	84152727640000	66693367876000	5.63473e+13	4.84249e+13	42645281636000	36692522220000	31854829778000	2.77727e+13	24093823502000	20152846208000	1.66438e+13	1.35297e+13	10591111864000	8001175346000	5523476382000	3128192178000
77	350	0	0	0	0	0	0	0	0	0	0	0	0	0	0	0	0	0	0	0
76	280	0	0	0	0	0	0	0	0	0	0	0	0	0	0	0	0	0	0	0
76	281	0	0	0	0	0	0	0	0	0	0	0	0	0	0	0	0	0	0	0
76	282	0	0	0	0	0	0	0	0	0	0	0	0	0	0	0	0	0	0	0
76	283	0	0	0	0	0	0	0	0	0	0	0	0	0	0	0	0	0	0	0
76	284	0	0	0	0	0	0	0	0	0	0	0	0	0	0	0	0	0	0	0
76	285	0	0	0	0	0	0	0	0	0	0	0	0	0	0	0	0	0	0	0
76	286	0	0	0	0	0	0	0	0	0	0	0	0	0	0	0	0	0	0	0
76	287	0	0	0	0	0	0	0	0	0	0	0	0	0	0	0	0	0	0	0
76	288	0	0	0	0	0	0	0	0	0	0	0	0	0	0	0	0	0	0	0
76	289	0	0	0	0	0	0	0	0	0	0	0	0	0	0	0	0	0	0	0
76	290	0	0	0	0	0	0	0	0	0	0	0	0	0	0	0	0	0	0	0
76	291	134000000000	510288599920	219190076560	148404380920	1.03293e+11	79638386880	63006423460	5.20936e+10	42131683700	34775024740	29133971800	24351586840	1.95672e+10	15642386820	1.24022e+10	9489593240	7038312480	4788081300	2684026700
76	292	0	0	0	0	0	0	0	0	0	0	0	0	0	0	0	0	0	0	0
76	293	0	0	0	0	0	0	0	0	0	0	0	0	0	0	0	0	0	0	0
76	294	96200000000	366341517256	157358846008	106541055556	74155402516	57173229984	45232969678	37398561928	30246775910	24965353582	20915582740	17482258612	1.40475e+10	11229832926	8.90365e+09	6812678132	5052878064	3437413590	1926890810
76	295	0	0	0	0	0	0	0	0	0	0	0	0	0	0	0	0	0	0	0
76	296	244000000000	929182226720	399122228960	270228872720	1.88086e+11	145013182080	114728114360	9.48571e+10	76717394200	63321686840	53049918800	44341695440	3.56299e+10	28483152120	2.25831e+10	17279557840	12816031680	8718595800	4887332200
76	297	30600000000	116528590728	50053853304	33889358628	2.35879e+10	18186079392	14388034014	1.1896e+10	9621115830	7941162366	6652981620	5560884756	4.46834e+09	3572067438	2.83214e+09	2167026516	1607256432	1093397670	612919530
76	298	305000000000	1161477783400	498902786200	337786090900	2.35108e+11	181266477600	143410142950	1.18571e+11	95896742750	79152108550	66312398500	55427119300	4.45374e+10	35603940150	2.82288e+10	21599447300	16020039600	10898244750	6109165250
76	299	171000000000	651189183480	279712709640	189381709980	1.31815e+11	101628090720	80403719490	6.64777e+10	53765059050	44377083810	37178426700	31075532460	2.49701e+10	19961553330	1.58266e+10	12109854060	8981727120	6110163450	3425138550
76	300	197000000000	750200404360	322242127480	218176589860	151856697460	117080315040	92628846430	76585412680	61939863350	51124476670	42831286900	35800467220	2.87668e+10	22996643310	1.8233e+10	13951118420	10347369840	7039194150	3945919850
76	301	525000000000	1999265037000	858767091000	581435074500	4.04694e+11	312016068000	246853524750	2.04098e+11	165068163750	136245432750	114144292500	95407336500	7.66627e+10	61285470750	4.85906e+10	37179376500	27575478000	18759273750	10515776250
76	302	262000000000	997728456560	428565672080	290163789560	2.01962e+11	155710875840	123191663780	1.01855e+11	82376874100	67992958820	56963437400	47612804120	3.82583e+10	30584368260	2.4249e+10	18554279320	13761476640	9361770900	5247873100
76	303	529000000000	2.03567e+12	924292673770	6.44133e+11	463495776210	365055964810	2.94565e+11	247275098750	203049598430	1.69705e+11	143606905270	121172020560	98426030950	79393023570	63356462630	4.87671e+10	36345172470	2.4821e+10	1.39516e+10
76	304	372000000000	1.43151e+12	649975188360	4.52963e+11	325936538280	256712323080	2.07142e+11	173887215000	142787241240	1.19339e+11	100986330360	85209814080	69214524600	5.58303e+10	44553126840	3.42937e+10	25558419960	1.74545e+10	9810949440
76	305	224000000000	8.61987e+11	391382909120	2.72752e+11	196262861760	154579463360	1.24731e+11	104706280000	85979414080	7.18598e+10	60808973120	51309135360	41677563200	3.36182e+10	26827689280	2.065e+10	15390016320	1.05102e+10	5.90767e+09
76	306	0	0	0	0	0	0	0	0	0	0	0	0	0	0	0	0	0	0	0
76	307	187000000000	7.19605e+11	326734839310	2.27699e+11	163844442630	129046248430	1.04128e+11	87411046250	71777457290	5.99901e+10	50764633810	42833965680	34793322850	2.80652e+10	22396329890	1.7239e+10	12847915410	8.77415e+09	4931848240
76	308	402000000000	1.54696e+12	702392542260	4.89492e+11	352221742980	277414929780	2.23847e+11	187910377500	154302341340	1.28963e+11	109130389260	92081573280	74796341100	6.03327e+10	48146120940	3.70593e+10	27619582860	1.88621e+10	1.06022e+10
76	309	1010000000000	3.88664e+12	1764717581300	1.22982e+12	884935224900	696987758900	5.62401e+11	472113137500	387675036700	3.24011e+11	274183316300	231349226400	187921155500	151582143300	120964134700	9.31092e+10	69392484300	4.73898e+10	2.66373e+10
76	310	1500000000000	5802888945000	2698990290000	1909565925000	1392961635000	1110841500000	9.06563e+11	767668905000	635196945000	534216705000	454336290000	3.8517e+11	314220630000	254302800000	2.03582e+11	157159485000	117404235000	80329080000	45211635000
76	311	2290000000000	8859077122700	4120458509400	2915270645500	2126588096100	1695884690000	1.38402e+12	1171974528300	969734002700	815570836300	693620069400	588025902300	479710161800	388235608000	3.10802e+11	239930147100	179237132100	122635728800	69023096100
76	312	3160000000000	12224752710800	5685872877600	4022818882000	2934505844400	2340172760000	1.90983e+12	1617222493200	1338148230800	1125416525200	957135117600	8.11424e+11	661958127200	535731232000	4.2888e+11	331082648400	247331588400	169226595200	95245844400
76	313	4130000000000	1.59773e+13	7431219931800	5257671513500	3835287701700	3058516930000	2496070897600	2113648385100	1748908921900	1470876661100	1250939251800	1.0605e+12	865154134600	700180376000	560530084100	432712448700	323252993700	221172733600	124482701700
76	314	4940000000000	19110847592200	8888674688400	6288837113000	4587486984600	3658371340000	2.98562e+12	2528189593800	2091915272200	1759353681800	1496280848400	1268492557800	1034833274800	837503888000	6.70465e+11	517578570600	386651280600	264550436800	148896984600
76	315	10100000000000	3.93948e+13	19126991554000	1.38589e+13	10354740483000	8.39013e+12	6.94688e+12	5947754862000	4976084867000	4222891204000	3.6197e+12	3091372044000	2541734993000	2.07045e+12	1665041560000	1290701624000	9.67436e+11	663695846000	374246107000
76	316	18500000000000	7.21588e+13	35034588490000	2.5385e+13	18966603855000	1.53681e+13	1.27245e+13	10894402470000	9114610895000	7734998740000	6.63014e+12	5662414140000	4655653205000	3.79242e+12	3049828600000	2364156440000	1.77204e+12	1215680510000	685500295000
76	317	20600000000000	8.03498e+13	39011487724000	2.82666e+13	21119569698000	1.71125e+13	1.41689e+13	12131064372000	10149242402000	8613025624000	7.38275e+12	6305174664000	5184132758000	4.22291e+12	3396025360000	2632520144000	1.97319e+12	1353676676000	763313842000
76	318	22200000000000	8.65906e+13	42041506188000	3.04621e+13	22759924626000	18441677640000	1.52694e+13	13073282964000	10937533074000	9281998488000	7.95617e+12	6794896968000	5586783846000	4550900766000	3659794320000	2836987728000	2.12644e+12	1458816612000	822600354000
76	319	24000000000000	9.36114e+13	45450276960000	3.2932e+13	24605323920000	19936948800000	1.65074e+13	14133278880000	11824360080000	10034592960000	8.60127e+12	7345834560000	6039766320000	4919892720000	3956534400000	3067013760000	2298857760000	1577099040000	889297680000
76	320	26000000000000	1.01412e+14	49237800040000	3.56763e+13	26655767580000	21598361200000	17883045180000	15311052120000	1.28097e+13	10870809040000	9.31804e+12	7957987440000	6543080180000	5329883780000	4286245600000	3322598240000	2490429240000	1708523960000	963405820000
76	321	26000000000000	1.01412e+14	49237800040000	3.56763e+13	26655767580000	21598361200000	17883045180000	15311052120000	1.28097e+13	10870809040000	9.31804e+12	7957987440000	6543080180000	5329883780000	4286245600000	3322598240000	2490429240000	1708523960000	963405820000
76	322	26600000000000	1.03753e+14	50374056964000	3.64996e+13	27270900678000	22096784920000	18295730838000	15664384092000	1.31053e+13	11121673864000	9.53307e+12	8141633304000	6694074338000	5.45288e+12	4385158960000	3399273584000	2547900684000	1747951436000	985638262000
76	323	30100000000000	1.17404e+14	57002222354000	4.13022e+13	30859177083000	25004256620000	20703063843000	17725487262000	1.48297e+13	12585052004000	1.07874e+13	9212900844000	7574873593000	6.17037e+12	4962153560000	3846546424000	2883150774000	1977945046000	1115327507000
76	324	33400000000000	1.30276e+14	63251635436000	4.58303e+13	34242409122000	2.77456e+13	22972834962000	19668813108000	1.64556e+13	13964808536000	1.19701e+13	10222953096000	8405341462000	6.84685e+12	5506177040000	4268260816000	3.19924e+12	2194796164000	1237605938000
76	325	38700000000000	1.50948e+14	73288571598000	5.31028e+13	39676084821000	3.21483e+13	2.66182e+13	22789912194000	19066780629000	16180781148000	1.38695e+13	11845158228000	9739123191000	7.93333e+12	6379911720000	4945559688000	3.70691e+12	2543072202000	1433992509000
76	326	42400000000000	1.6538e+14	80295489296000	5.81798e+13	43469405592000	35221942880000	2.91631e+13	24968792688000	20889702808000	17727780896000	1.51956e+13	12977641056000	10670253832000	8.69181e+12	6989877440000	5418390976000	4.06132e+12	2786208304000	1571092568000
76	327	42000000000000	1.6382e+14	79537984680000	5.76309e+13	43059316860000	3.48897e+13	2.8888e+13	24733238040000	20692630140000	17560537680000	1.50522e+13	12855210480000	10569591060000	8.60981e+12	6923935200000	5367274080000	4.023e+12	2759923320000	1556270940000
76	328	45500000000000	1.77472e+14	86166150070000	6.24335e+13	46647593265000	37797132100000	3.12953e+13	26794341210000	22417015985000	19023915820000	1.63066e+13	13926478020000	11450390315000	9327296615000	7500929800000	5814546920000	4.35825e+12	2989916930000	1685960185000
76	329	49600000000000	1.93464e+14	93930572384000	6.80594e+13	50851002768000	41203027520000	3.41153e+13	29208776352000	2.4437e+13	20738158784000	1.7776e+13	15181391424000	12482183728000	10167778288000	8176837760000	6338495104000	4750972704000	3259338016000	1837881872000
76	330	47700000000000	1.86053e+14	90332425458000	6.54523e+13	48903081291000	39624685740000	3.28085e+13	28089891774000	23500915659000	19943753508000	1.7095e+13	14599846188000	12004035561000	9778286781000	7863612120000	6095689848000	4568979798000	3134484342000	1767479139000
76	331	47900000000000	1.86833e+14	90711177766000	6.57267e+13	49108125657000	39790826980000	3.29461e+13	28207669098000	23599451993000	20027375116000	1.71667e+13	14661061476000	12054366947000	9819285887000	7896583240000	6121248296000	4588136946000	3147626834000	1774889953000
76	332	49000000000000	1.91123e+14	92794315460000	6.72361e+13	50235869670000	40704603800000	3.37027e+13	28855444380000	24141401830000	20487293960000	1.75609e+13	14997745560000	12331189570000	10044780970000	8077924400000	6261819760000	4693501260000	3219910540000	1815649430000
76	333	49000000000000	1.91123e+14	92794315460000	6.72361e+13	50235869670000	40704603800000	3.37027e+13	28855444380000	24141401830000	20487293960000	1.75609e+13	14997745560000	12331189570000	10044780970000	8077924400000	6261819760000	4693501260000	3219910540000	1815649430000
76	334	50700000000000	1.97754e+14	96013710078000	6.95688e+13	51978746781000	42116804340000	3.48719e+13	29856551634000	2.4979e+13	21198077628000	1.81702e+13	15518075508000	12759006351000	10393273371000	8358178920000	6479066568000	4856337018000	3331621722000	1878641349000
76	335	49700000000000	198047985821000	105667013445000	81369466220000	64487556098000	5.44837e+13	4.68233e+13	41234834578000	35478956310000	30801265369000	2.68541e+13	23296946071000	19486312384000	1.60933e+13	1.30822e+13	10240822172000	7736545033000	5340793311000	3024730569000
76	336	47000000000000	187288839710000	99926551950000	76948992200000	60984207980000	5.15238e+13	4.42796e+13	38994712780000	3.35515e+13	29127957190000	2.53952e+13	22031317210000	18427699840000	1.5219e+13	1.23715e+13	9684479720000	7316249830000	5050649610000	2860409190000
76	337	49200000000000	196055551356000	104603965020000	80550859920000	63838787928000	5.39355e+13	4.63523e+13	40819997208000	3.5122e+13	30491393484000	2.65839e+13	23062570356000	19290273024000	1.59314e+13	1.29506e+13	10137795792000	7658712588000	5287062996000	2994300684000
76	338	53400000000000	212792000862000	1.13534e+14	87427152840000	69288440556000	5.85398e+13	5.03092e+13	44304631116000	38120246820000	33094317318000	2.88533e+13	25031326362000	20937003648000	1.72914e+13	1.40562e+13	11003217384000	8312505126000	5738397642000	3249911718000
76	339	56400000000000	224746607652000	1.19912e+14	92338790640000	73181049576000	6.18285e+13	5.31355e+13	46793655336000	40261833720000	34953548628000	3.04743e+13	26437580652000	22113239808000	18262808424000	1.48458e+13	11621375664000	8779499796000	6060779532000	3432491028000
76	340	56500000000000	225145094545000	1.20124e+14	92502511900000	73310803210000	6.19382e+13	5.32298e+13	46876622810000	40333219950000	35015523005000	3.05283e+13	26484455795000	22152447680000	18295189290000	1.48722e+13	11641980940000	8795066285000	6071525595000	3438577005000
76	341	57100000000000	227536015903000	1.214e+14	93484839460000	74089325014000	6.25959e+13	5.3795e+13	47374427654000	40761537330000	35387369267000	3.08525e+13	26765706653000	22387694912000	18489474486000	1.50301e+13	11765612596000	8888465219000	6136001973000	3475092867000
76	342	58100000000000	231520884833000	1.23526e+14	95122052060000	75386861354000	6.36922e+13	5.47371e+13	48204102394000	41475399630000	36007113037000	3.13928e+13	27234458083000	22779773632000	18813283146000	1.52933e+13	11971665356000	9044130109000	6243462603000	3535952637000
76	343	54000000000000	215182922220000	1.14809e+14	88409480400000	70066962360000	5.91975e+13	5.08745e+13	44802435960000	38548564200000	33466163580000	2.91775e+13	25312577220000	21172250880000	1.74857e+13	1.42141e+13	11126849040000	8405904060000	5802874020000	3286427580000
76	344	53400000000000	212792000862000	1.13534e+14	87427152840000	69288440556000	5.85398e+13	5.03092e+13	44304631116000	38120246820000	33094317318000	2.88533e+13	25031326362000	20937003648000	1.72914e+13	1.40562e+13	11003217384000	8312505126000	5738397642000	3249911718000
76	345	56100000000000	223551146973000	1.19274e+14	91847626860000	72791788674000	6.14997e+13	5.28529e+13	46544752914000	40047675030000	34767625497000	3.03122e+13	26296955223000	21995616192000	18165665826000	1.47669e+13	11559559836000	8732800329000	6028541343000	3414233097000
76	346	56300000000000	224348120759000	1.19699e+14	92175069380000	73051295942000	6.17189e+13	5.30413e+13	46710687862000	40190447490000	34891574251000	3.04202e+13	26390705509000	22074031936000	18230427558000	1.48195e+13	11600770388000	8763933307000	6050033469000	3426405051000
76	347	56400000000000	224746607652000	1.19912e+14	92338790640000	73181049576000	6.18285e+13	5.31355e+13	46793655336000	40261833720000	34953548628000	3.04743e+13	26437580652000	22113239808000	18262808424000	1.48458e+13	11621375664000	8779499796000	6060779532000	3432491028000
76	348	56600000000000	225543581438000	1.20337e+14	92666233160000	73440556844000	6.20478e+13	5.3324e+13	46959590284000	40404606180000	35077497382000	3.05823e+13	26531330938000	22191655552000	18327570156000	1.48985e+13	11662586216000	8810632774000	6082271658000	3444662982000
76	349	56700000000000	225942068331000	1.2055e+14	92829954420000	73570310478000	6.21574e+13	5.34182e+13	47042557758000	40475992410000	35139471759000	3.06364e+13	26578206081000	22230863424000	18359951022000	1.49248e+13	11683191492000	8826199263000	6093017721000	3450748959000
76	350	0	0	0	0	0	0	0	0	0	0	0	0	0	0	0	0	0	0	0
75	280	0	0	0	0	0	0	0	0	0	0	0	0	0	0	0	0	0	0	0
75	281	0	0	0	0	0	0	0	0	0	0	0	0	0	0	0	0	0	0	0
75	282	0	0	0	0	0	0	0	0	0	0	0	0	0	0	0	0	0	0	0
75	283	0	0	0	0	0	0	0	0	0	0	0	0	0	0	0	0	0	0	0
75	284	0	0	0	0	0	0	0	0	0	0	0	0	0	0	0	0	0	0	0
75	285	0	0	0	0	0	0	0	0	0	0	0	0	0	0	0	0	0	0	0
75	286	0	0	0	0	0	0	0	0	0	0	0	0	0	0	0	0	0	0	0
75	287	0	0	0	0	0	0	0	0	0	0	0	0	0	0	0	0	0	0	0
75	288	0	0	0	0	0	0	0	0	0	0	0	0	0	0	0	0	0	0	0
75	289	0	0	0	0	0	0	0	0	0	0	0	0	0	0	0	0	0	0	0
75	290	0	0	0	0	0	0	0	0	0	0	0	0	0	0	0	0	0	0	0
75	291	176000000000	670229802880	287891443840	194919186880	1.35669e+11	104599672320	82754705440	6.84215e+10	55337136800	45674659360	38265515200	31984173760	2.57003e+10	20545224480	1.62894e+10	12463943360	9244350720	6288823200	3525288800
75	292	0	0	0	0	0	0	0	0	0	0	0	0	0	0	0	0	0	0	0
75	293	0	0	0	0	0	0	0	0	0	0	0	0	0	0	0	0	0	0	0
75	294	88000000000	335114901440	143945721920	97459593440	6.78345e+10	52299836160	41377352720	3.42107e+10	27668568400	22837329680	19132757600	15992086880	1.28501e+10	10272612240	8.14471e+09	6231971680	4622175360	3144411600	1762644400
75	295	0	0	0	0	0	0	0	0	0	0	0	0	0	0	0	0	0	0	0
75	296	161000000000	613107944680	263355241240	178306756180	1.24106e+11	95684927520	75701747590	6.25901e+10	50620903550	41781932710	35004249700	29258249860	2.35099e+10	18794211030	1.49011e+10	11401675460	8.45648e+09	5752843950	3224838050
75	297	89000000000	338923025320	145581468760	98567088820	6.86053e+10	52894152480	41847549910	34599501160	27982983950	23096844790	19350175300	16173815140	1.29962e+10	10389346470	8.23726e+09	6302789540	4674700080	3180143550	1782674450
75	298	237000000000	902525359560	387672001080	262476405060	182690544660	140852967840	111436734030	9.21358e+10	74516485350	61505081070	51527994900	43069597620	3.46077e+10	27666012510	2.19352e+10	16783832820	12448358640	8468472150	4747121850
75	299	147000000000	559794210360	240454785480	162801820860	1.13314e+11	87364499040	69118986930	5.71475e+10	46219085850	38148721170	31960401900	26714054220	2.14656e+10	17159931810	1.36054e+10	10410225420	7721133840	5252596650	2944417350
75	300	215000000000	818746634200	351685570600	238111506700	165731928700	127778008800	101092395850	8.35831e+10	67599343250	55795748650	46744805500	39071575900	3.13952e+10	25097859450	1.9899e+10	15225839900	11292814800	7682369250	4306460750
75	301	514000000000	1957375674320	840773875760	569252625320	3.96215e+11	305478588480	241681355660	1.99822e+11	161609592700	133390766540	111752697800	93408325640	7.50564e+10	60001394220	4.75725e+10	36400380040	26997706080	18366222300	10295445700
75	302	164000000000	6.31098e+11	286548201320	1.99693e+11	143692452360	113174249960	9.13206e+10	76659955000	62949213880	5.26116e+10	44520855320	37565616960	30513930200	2.46133e+10	19641701080	1.51187e+10	11267690520	7.69497e+09	4325257280
75	303	442000000000	1.70089e+12	772282347460	5.38198e+11	387268682580	305018405380	2.4612e+11	206607927500	169655808140	1.41795e+11	119989134460	101243918880	82238763100	6.63359e+10	52936779740	4.07468e+10	30367800060	2.07389e+10	1.16571e+10
75	304	380000000000	1.4623e+12	663953149400	4.62704e+11	332945926200	262233018200	2.11596e+11	177626725000	145857934600	1.21905e+11	103158079400	87042283200	70703009000	5.70309e+10	45511258600	3.50312e+10	26108063400	1.78298e+10	10021937600
75	305	218000000000	8.38898e+11	380899438340	2.65446e+11	191005820820	150438942020	1.2139e+11	101901647500	83676394060	6.99349e+10	59180161340	49934783520	40561199900	3.27177e+10	26109090460	2.00968e+10	14977783740	1.02287e+10	5.74943e+09
75	306	136000000000	5.23349e+11	237625337680	1.65599e+11	119159594640	93851817040	7.57293e+10	63571670000	52201787120	4.36291e+10	36919733680	31151975040	25304234800	20411060880	16288239920	1.25375e+10	9343938480	6.3812e+09	3.5868e+09
75	307	348000000000	1.33916e+12	608041305240	4.2374e+11	304908374520	240150237720	1.93778e+11	162668685000	133575161160	1.11639e+11	94471083240	79712406720	64749071400	5.22283e+10	41678731560	3.20812e+10	23909489640	1.63284e+10	9177984960
75	308	614000000000	2.36277e+12	1072808509820	7.47633e+11	537970522860	423713350460	3.41895e+11	287007392500	235675715380	1.96973e+11	166681738820	140642004960	114241177700	9.21499e+10	73536612580	5.6603e+10	42185134020	2.88092e+10	1.61933e+10
75	309	1370000000000	5299971903100	2465077798200	1744070211500	1272238293300	1014568570000	8.27994e+11	701137599900	580146543100	487917923900	414960478200	351788421900	286988175400	232263224000	1.85939e+11	143538996300	107229201300	73367226400	41293293300
75	310	2150000000000	8.31747e+12	3868552749000	2737044492500	1996578343500	1592206150000	1299407368000	1100325430500	910448954500	765710610500	651215349000	552076720500	450382903000	364500680000	291801375500	225261928500	168279403500	115138348000	64803343500
75	311	3100000000000	11992637153000	5577913266000	3946436245000	2878787379000	2295739100000	1.87356e+12	1586515737000	1312740353000	1104047857000	938961666000	7.96018e+11	649389302000	525559120000	4.20737e+11	324796269000	242635419000	166013432000	93437379000
75	312	4180000000000	1.61707e+13	7521186274800	5321323711000	3881719756200	3095544980000	2526289673600	2139237348600	1770082153400	1488683884600	1266083794800	1.07334e+12	875628155600	708657136000	567316162600	437951098200	327166468200	223850369600	125989756200
75	313	5850000000000	22631266885500	10526062131000	7447307107500	5432550376500	4332281850000	3.5356e+12	2993908729500	2477268085500	2083445149500	1771911531000	1.50216e+12	1225460457000	991780920000	7.93971e+11	612921991500	457876516500	313283412000	176325376500
75	314	12200000000000	47196830086000	21951787692000	15531136190000	11329421298000	9034844200000	7.37338e+12	6243707094000	5166268486000	4344962534000	3695268492000	3.13271e+12	2555661124000	2068329440000	1.6558e+12	1278230478000	954887778000	653343184000	367721298000
75	315	18300000000000	7.13787e+13	34655836182000	2.51106e+13	18761559489000	1.52019e+13	1.25869e+13	10776625146000	9016074561000	7651377132000	6.55847e+12	5601198852000	4605321819000	3.75142e+12	3016857480000	2338597992000	1.75288e+12	1202538018000	678089481000
75	316	21600000000000	8.42503e+13	40905249264000	2.96388e+13	22144791528000	17943253920000	1.48567e+13	12719950992000	10641924072000	9031133664000	7.74114e+12	6611251104000	5435789688000	4427903448000	3560880960000	2760312384000	2.06897e+12	1419389136000	800367912000
75	317	23100000000000	9.0101e+13	43745891574000	3.1697e+13	23682624273000	19189313220000	1.58884e+13	13603280922000	11380946577000	9658295724000	8.27872e+12	7070365764000	5813275083000	4735396743000	3808164360000	2952000744000	2212650594000	1517957826000	855949017000
75	318	25100000000000	9.79019e+13	47533414654000	3.44413e+13	25733067933000	20850725620000	1.7264e+13	14781054162000	1.23663e+13	10494511804000	8.99549e+12	7682518644000	6316588943000	5145387803000	4137875560000	3207585224000	2404222074000	1649382746000	930057157000
75	319	27400000000000	1.06873e+14	51889066196000	3.75973e+13	28091078142000	22761349880000	18845978382000	16135493388000	1.34995e+13	11456160296000	9.81978e+12	8386494456000	6895399882000	5.61688e+12	4517043440000	3501507376000	2624529276000	1800521404000	1015281518000
75	320	29700000000000	1.15844e+14	56244717738000	4.07533e+13	30449088351000	24671974140000	20427940071000	17489932614000	1.46326e+13	12417808788000	1.06441e+13	9090470268000	7474210821000	6.08837e+12	4896211320000	3795429528000	2844836478000	1951660062000	1100505879000
75	321	29800000000000	1.16234e+14	56434093892000	4.08905e+13	30551610534000	24755044760000	20496721014000	17548821276000	1.46819e+13	12459619592000	1.06799e+13	9121077912000	7499376514000	6.10887e+12	4912696880000	3808208752000	2854415052000	1958231308000	1104211286000
75	322	30500000000000	1.18965e+14	57759726970000	4.1851e+13	31269265815000	25336539100000	20978187615000	17961041910000	1.50268e+13	12752295220000	1.09308e+13	9335331420000	7675536365000	6.25236e+12	5028095800000	3897663320000	2.92147e+12	2004230030000	1130149135000
75	323	34700000000000	1.35347e+14	65713525438000	4.76141e+13	35575197501000	2.88255e+13	23866987221000	20434365714000	1.70961e+13	14508348988000	1.2436e+13	10620852468000	8732495471000	7.11334e+12	5720489320000	4434390728000	3.32377e+12	2280222362000	1285776229000
75	324	38600000000000	1.50558e+14	73099195444000	5.29656e+13	39573562638000	3.20653e+13	2.65494e+13	22731023532000	19017512462000	16138970344000	1.38337e+13	11814550584000	9713957498000	7.91283e+12	6363426160000	4932780464000	3.69733e+12	2536500956000	1430287102000
75	325	45000000000000	1.75521e+14	85219269300000	6.17474e+13	46134982350000	37381779000000	3.09514e+13	26499897900000	22170675150000	18814861800000	1.61274e+13	13773439800000	11324561850000	9224798850000	7418502000000	5750650800000	4.31036e+12	2957060700000	1667433150000
75	326	49400000000000	1.92683e+14	93551820076000	6.77849e+13	50645958402000	41036886280000	3.39778e+13	29090999028000	24338474498000	20654537176000	1.77043e+13	15120176136000	12431852342000	10126779182000	8143866640000	6312936656000	4731815556000	3246195524000	1830471058000
75	327	48900000000000	1.90733e+14	92604939306000	6.70989e+13	50133347487000	40621533180000	3.36339e+13	28796555718000	24092133663000	20445483156000	1.75251e+13	14967137916000	12306023877000	10024281417000	8061438840000	6249040536000	4683922686000	3213339294000	1811944023000
75	328	53100000000000	2.07115e+14	100558737774000	7.2862e+13	54439279173000	44110499220000	36522680733000	31269879522000	2.61614e+13	22201536924000	1.90303e+13	16252658964000	13362982983000	1.08853e+13	8753832360000	6785767944000	5086222794000	3489331626000	1967571117000
75	329	57900000000000	2.25838e+14	109648793166000	7.94483e+13	59360343957000	48097888980000	39824165997000	34096535298000	2.85263e+13	24208455516000	2.07506e+13	17721825876000	14570936247000	1.18692e+13	9545139240000	7399170696000	5545994346000	3804751434000	2145430653000
75	330	55800000000000	2.17647e+14	105671893932000	7.65668e+13	57207378114000	46353405960000	38379766194000	32859873396000	2.74916e+13	23330428632000	1.99979e+13	17079065352000	14042456694000	1.14388e+13	9198942480000	7130806992000	5344844292000	3666755268000	2067617106000
75	331	55900000000000	2.18037e+14	105861270086000	7.6704e+13	57309900297000	46436476580000	38448547137000	32918762058000	2.75409e+13	23372239436000	2.00338e+13	17109672996000	14067622387000	1.14593e+13	9215428040000	7143586216000	5354422866000	3673326514000	2071322513000
75	332	57200000000000	2.23107e+14	108323160088000	7.84878e+13	58642688676000	47516394640000	39342699396000	33684314664000	2.81814e+13	23915779888000	2.04997e+13	17507572368000	14394776396000	1.17257e+13	9429740320000	7309716128000	5478944328000	3758752712000	2119492804000
75	333	57100000000000	2.22717e+14	108133783934000	7.83506e+13	58540166493000	47433324020000	39273918453000	33625426002000	2.81321e+13	23873969084000	2.04638e+13	17476964724000	14369610703000	1.17052e+13	9413254760000	7296936904000	5469365754000	3752181466000	2115787397000
75	334	59200000000000	2.30908e+14	112110683168000	8.12322e+13	60693132336000	49177807040000	40718318256000	34862087904000	2.91668e+13	24751995968000	2.12165e+13	18119725248000	14898090256000	1.21357e+13	9759451520000	7565300608000	5670515808000	3890177632000	2193600944000
75	335	57900000000000	230723911047000	1.23101e+14	94794609540000	75127354086000	6.34729e+13	5.45487e+13	48038167446000	41332627170000	35883164283000	3.12848e+13	27140707797000	22701357888000	18748521414000	1.52407e+13	11930454804000	9012997131000	6221970477000	3523780683000
75	336	54800000000000	218370817364000	1.1651e+14	89719250480000	71104991432000	6.00745e+13	5.16282e+13	45466175752000	39119654040000	33961958596000	2.96098e+13	25687578364000	21485913856000	17744714568000	1.44247e+13	11291691248000	8530435972000	5888842524000	3335115396000
75	337	57300000000000	228332989689000	1.21825e+14	93812281980000	74348832282000	6.28152e+13	5.39835e+13	47540362602000	40904309790000	35511318021000	3.09606e+13	26859456939000	22466110656000	18554236218000	1.50827e+13	11806823148000	8919598197000	6157494099000	3487264821000
75	338	62400000000000	248655821232000	1.32668e+14	102162066240000	80966267616000	6.8406e+13	5.87883e+13	51771703776000	44545007520000	38672011248000	3.37162e+13	29250089232000	24465712128000	20205660384000	1.64252e+13	12857692224000	9713489136000	6705543312000	3797649648000
75	339	65900000000000	2.62603e+14	1.4011e+14	107892310340000	85507644806000	7.22429e+13	6.20857e+13	54675565366000	47043525570000	40841114443000	3.56074e+13	3.08907e+13	25837987648000	21338990694000	1.73465e+13	13578876884000	10258316251000	7081655517000	4010658843000
75	340	66000000000000	2.63001e+14	1.40322e+14	108056031600000	85637398440000	7.23525e+13	6.21799e+13	54758532840000	47114911800000	40903088820000	3.56614e+13	3.09376e+13	25877195520000	2.13714e+13	1.73728e+13	13599482160000	10273882740000	7092401580000	4016744820000
75	341	66700000000000	2.65791e+14	141810659895000	109202080420000	86545673878000	7.31199e+13	6.28394e+13	55339305158000	47614615410000	41336909459000	3.60396e+13	3.12657e+13	26151650624000	2.1598e+13	1.75571e+13	13743719092000	10382848163000	7167624021000	4059346659000
75	342	67800000000000	2.70174e+14	144149366430000	111003014280000	87972963852000	7.43258e+13	6.38757e+13	56251947372000	48399863940000	42018627606000	3.6634e+13	3.17813e+13	26582937216000	2.19542e+13	1.78466e+13	13970377128000	10554079542000	7285830714000	4126292406000
75	343	63000000000000	251046742590000	1.33944e+14	103144393800000	81744789420000	6.90638e+13	5.93535e+13	52269508620000	44973324900000	39043857510000	3.40404e+13	2.95313e+13	24700959360000	20399945580000	1.65831e+13	12981323880000	9806888070000	6770019690000	3834165510000
75	344	62200000000000	247858847446000	1.32243e+14	101834623720000	80706760348000	6.81868e+13	5.85998e+13	51605768828000	44402235060000	38548062494000	3.36082e+13	29156338946000	24387296384000	20140898652000	1.63725e+13	12816481672000	9682356158000	6684051186000	3785477694000
75	345	65400000000000	2.6061e+14	1.39047e+14	107073704040000	84858876636000	7.16948e+13	6.16146e+13	54260727996000	46686594420000	40531242558000	3.53372e+13	3.06563e+13	25641948288000	21177086364000	1.72149e+13	13475850504000	10180483806000	7027925202000	3980228958000
75	346	65600000000000	2.61407e+14	1.39472e+14	107401146560000	85118383904000	7.1914e+13	6.1803e+13	54426662944000	46829366880000	40655191312000	3.54453e+13	3.07501e+13	25720364032000	21241848096000	1.72675e+13	13517061056000	10211616784000	7049417328000	3992400912000
75	347	65800000000000	2.62204e+14	1.39897e+14	107728589080000	85377891172000	7.21333e+13	6.19915e+13	54592597892000	46972139340000	40779140066000	3.55533e+13	3.08438e+13	25798779776000	21306609828000	1.73202e+13	13558271608000	10242749762000	7070909454000	4004572866000
75	348	66000000000000	2.63001e+14	1.40322e+14	108056031600000	85637398440000	7.23525e+13	6.21799e+13	54758532840000	47114911800000	40903088820000	3.56614e+13	3.09376e+13	25877195520000	2.13714e+13	1.73728e+13	13599482160000	10273882740000	7092401580000	4016744820000
75	349	66200000000000	2.63798e+14	140747611470000	108383474120000	85896905708000	7.25718e+13	6.23683e+13	54924467788000	47257684260000	41027037574000	3.57695e+13	3.10313e+13	25955611264000	2.14361e+13	1.74254e+13	13640692712000	10305015718000	7113893706000	4028916774000
75	350	0	0	0	0	0	0	0	0	0	0	0	0	0	0	0	0	0	0	0
74	280	0	0	0	0	0	0	0	0	0	0	0	0	0	0	0	0	0	0	0
74	281	0	0	0	0	0	0	0	0	0	0	0	0	0	0	0	0	0	0	0
74	282	0	0	0	0	0	0	0	0	0	0	0	0	0	0	0	0	0	0	0
74	283	0	0	0	0	0	0	0	0	0	0	0	0	0	0	0	0	0	0	0
74	284	0	0	0	0	0	0	0	0	0	0	0	0	0	0	0	0	0	0	0
74	285	0	0	0	0	0	0	0	0	0	0	0	0	0	0	0	0	0	0	0
74	286	0	0	0	0	0	0	0	0	0	0	0	0	0	0	0	0	0	0	0
74	287	0	0	0	0	0	0	0	0	0	0	0	0	0	0	0	0	0	0	0
74	288	0	0	0	0	0	0	0	0	0	0	0	0	0	0	0	0	0	0	0
74	289	0	0	0	0	0	0	0	0	0	0	0	0	0	0	0	0	0	0	0
74	290	0	0	0	0	0	0	0	0	0	0	0	0	0	0	0	0	0	0	0
74	291	167000000000	635956687960	273169722280	184951728460	1.28731e+11	99250825440	78522930730	6.49227e+10	52507396850	43339023370	36308755900	30348619420	2.4386e+10	19494616410	1.54564e+10	11826582620	8771628240	5967235650	3345018350
74	292	0	0	0	0	0	0	0	0	0	0	0	0	0	0	0	0	0	0	0
74	293	0	0	0	0	0	0	0	0	0	0	0	0	0	0	0	0	0	0	0
74	294	105000000000	399853007400	171753418200	116287014900	80938848900	62403213600	49370704950	4.08196e+10	33013632750	27249086550	22828858500	19081467300	1.53325e+10	12257094150	9.71812e+09	7435875300	5515095600	3751854750	2103155250
74	295	0	0	0	0	0	0	0	0	0	0	0	0	0	0	0	0	0	0	0
74	296	234000000000	891100987920	382764760560	259153918920	180378006120	139070018880	110026142460	9.09695e+10	73573238700	60726535740	50875741800	42524412840	3.41697e+10	27315809820	2.16575e+10	16571379240	12290784480	8361276300	4687031700
74	297	29100000000	110816404908	47600233044	32228115558	22431623838	17294604912	13682738229	1.13129e+10	9149492505	7551889701	6326855070	5288292366	4.2493e+09	3396966093	2.69331e+09	2060799726	1528469352	1039799745	582874455
74	298	257000000000	978687837160	420386937880	284626312660	1.98107e+11	152739294240	120840677830	9.99109e+10	80804796350	66695383270	55876348900	46704162820	3.75282e+10	30000697110	2.37862e+10	18200190020	13498853040	9183111150	5147722850
74	299	201000000000	765432899880	328785114840	222606571380	154940082180	119457580320	94509635190	7.81404e+10	63197525550	52162537110	43700957700	36527380260	2.93509e+10	23463580230	1.86033e+10	14234389860	10557468720	7182121950	4026040050
74	300	221000000000	841595377480	361500051640	244756478980	170357005780	131343906720	103913578990	8.59156e+10	69485836550	57352839310	48049311700	40161945460	3.22714e+10	25798264830	2.04543e+10	15650747060	11607963120	7896760950	4426641050
74	301	519000000000	1976416293720	848952609960	574790102220	4.00069e+11	308450170080	244032341610	2.01766e+11	163181670450	134688342090	112839786300	94316966940	7.57866e+10	60585065370	4.80353e+10	36754469340	27260329680	18544882050	10395595950
74	302	321000000000	1.23526e+12	560865686730	3.90863e+11	281251690290	221517891690	1.78743e+11	150047838750	123211571070	1.02978e+11	87141430230	73527823440	59725436550	4.81761e+10	38445036870	2.95921e+10	22054443030	1.50615e+10	8.4659e+09
74	303	485000000000	1.86636e+12	847413888050	5.90557e+11	424944142650	334692141650	2.70064e+11	226707793750	186160784950	1.55589e+11	131662285550	111093440400	90239366750	72789445050	58086737950	4.47109e+10	33322133550	2.27565e+10	1.27912e+10
74	304	416000000000	1.60083e+12	726853974080	5.06539e+11	364488171840	287076146240	2.31642e+11	194454520000	159676054720	1.33454e+11	112930950080	95288394240	77401188800	6.24338e+10	49822851520	3.83499e+10	28581458880	1.9519e+10	1.09714e+10
74	305	336000000000	1.29298e+12	587074363680	4.09128e+11	294394292640	231869195040	1.87096e+11	157059420000	128969121120	1.0779e+11	91213459680	76963703040	62516344800	5.04273e+10	40241533920	3.09749e+10	23085024480	1.57653e+10	8861502720
74	306	181000000000	6.96516e+11	316251368530	2.20393e+11	158587401690	124905727090	1.00787e+11	84606413750	69474437270	5.80653e+10	49135822030	41459613840	33676959550	2.71647e+10	21677731070	1.66859e+10	12435682830	8.49262e+09	4773607120
74	307	579000000000	2.22808e+12	1011654930270	7.05015e+11	507304450710	399560309310	3.22406e+11	270647036250	222241431930	1.85745e+11	157180336770	132624952560	107729058450	86897090070	69344786130	5.33765e+10	39780443970	2.7167e+10	1.52703e+10
74	308	862000000000	3.31711e+12	1506125302060	1.04961e+12	755261548380	594854899180	4.7999e+11	402932202500	330867209540	2.76532e+11	234005959060	197448547680	160384194100	1.2937e+11	103238697140	7.94655e+10	59224080660	4.04455e+10	2.2734e+10
74	309	1790000000000	6924780807700	3220795079400	2278748670500	1662267551100	1325604190000	1.08183e+12	916084893300	758001687700	637498601300	542174639400	4.59636e+11	374969951800	303468008000	2.42942e+11	187543652100	140102387100	95859368800	53952551100
74	310	2830000000000	10948117142900	5092095013800	3602714378500	2628054284700	2095787630000	1.71038e+12	1448335334100	1198404902900	1007888850100	857181133800	726687032100	592829588600	479784616000	3.84092e+11	296507561700	221502656700	151554197600	85299284700
74	311	4110000000000	1.58999e+13	7395233394600	5232210634500	3816714879900	3043705710000	2483983387200	2103412799700	1740439629300	1463753771700	1244881434600	1.05537e+12	860964526200	696789672000	557815652700	430616988900	321687603900	220101679200	123879879900
74	312	6360000000000	24604249126800	11443718829600	8096559522000	5906157332400	4709967960000	3.84383e+12	3254916157200	2693235046800	2265078829200	1926385869600	1.63312e+12	1332295471200	1078243872000	8.63189e+11	666356216400	497793956400	340595299200	191697332400
74	313	14100000000000	54547156083000	25370508726000	17949919695000	13093839369000	10441910100000	8.52169e+12	7216087707000	5970851283000	5021637027000	4270761126000	3.6206e+12	2953673922000	2390446320000	1.91367e+12	1477299159000	1103599809000	755093352000	424989369000
74	314	20000000000000	77371852600000	35986537200000	25460879000000	18572821800000	14811220000000	1.20875e+13	10235585400000	8469292600000	7122889400000	6057817200000	5135597400000	4189608400000	3390704000000	2.71443e+12	2095459800000	1565389800000	1071054400000	602821800000
74	315	21300000000000	8.30801e+13	40337120802000	2.92271e+13	21837224979000	17694042060000	1.46503e+13	12543285006000	10494119571000	8905701252000	7.63362e+12	6519428172000	5360292609000	4.3664e+12	3511424280000	2721974712000	2.04024e+12	1399675398000	789251691000
74	316	24100000000000	9.40015e+13	45639653114000	3.30692e+13	24707846103000	20020019420000	1.65762e+13	14192167542000	11873628247000	10076403764000	8.63711e+12	7376442204000	6064932013000	4940392273000	3973019960000	3079792984000	2308436334000	1583670286000	893003087000
74	317	26200000000000	1.02192e+14	49616552348000	3.59507e+13	26860811946000	21764502440000	18020607066000	15428829444000	1.29083e+13	10954430648000	9.38972e+12	8019202728000	6593411566000	5370882886000	4319216720000	3348156688000	2509586388000	1721666452000	970816634000
74	318	28600000000000	1.11554e+14	54161580044000	3.92439e+13	29321344338000	23758197320000	19671349698000	16842157332000	1.40907e+13	11957889944000	1.02498e+13	8753786184000	7197388198000	5.86287e+12	4714870160000	3654858064000	2739472164000	1879376356000	1059746402000
74	319	31400000000000	1.22475e+14	59464112356000	4.3086e+13	32191965462000	26084174680000	21597216102000	18491039868000	1.54702e+13	13128592456000	1.12533e+13	9610800216000	7902027602000	6.43686e+12	5176465840000	4012676336000	3.00767e+12	2063371244000	1163497798000
74	320	34300000000000	1.33786e+14	64956020822000	4.70653e+13	35165108769000	2.84932e+13	23591863449000	20198811066000	1.6899e+13	14341105772000	1.22926e+13	10498421892000	8631832699000	7.03135e+12	5654547080000	4383273832000	3.28545e+12	2253937378000	1270954601000
74	321	34400000000000	1.34176e+14	65145396976000	4.72025e+13	35267630952000	2.85763e+13	23660644392000	20257699728000	1.69482e+13	14382916576000	1.23285e+13	10529029536000	8656998392000	7.05185e+12	5671032640000	4396053056000	3.29503e+12	2260508624000	1274660008000
74	322	35300000000000	1.37687e+14	66849782362000	4.84374e+13	36190330599000	2.93239e+13	2.42797e+13	20787697686000	1.73917e+13	14759213812000	1.2651e+13	10804498332000	8883489629000	7.23634e+12	5819402680000	4511066072000	3.38124e+12	2319649838000	1308008671000
74	323	40200000000000	1.56799e+14	76129213908000	5.5161e+13	41213917566000	3.33944e+13	2.76499e+13	23673242124000	19805803134000	16807943208000	1.44071e+13	12304272888000	10116608586000	8.24082e+12	6627195120000	5137248048000	3.85059e+12	2641640892000	1489573614000
74	324	45100000000000	1.75911e+14	85408645454000	6.18846e+13	46237504533000	37464849620000	3.10202e+13	26558786562000	22219943317000	18856672604000	1.61632e+13	13804047444000	11349727543000	9245298403000	7434987560000	5763430024000	4.31994e+12	2963631946000	1671138557000
74	325	52800000000000	2.05945e+14	99990609312000	7.24503e+13	54131712624000	43861287360000	36316337904000	31093213536000	2.60136e+13	22076104512000	1.89228e+13	16160836032000	13287485904000	1.08238e+13	8704375680000	6747430272000	5057487072000	3469617888000	1956454896000
74	326	58000000000000	2.26228e+14	109838169320000	7.95856e+13	59462866140000	48180959600000	39892946940000	34155423960000	2.85755e+13	24250266320000	2.07864e+13	17752433520000	14596101940000	1.18897e+13	9561624800000	7411949920000	5555572920000	3811322680000	2149136060000
74	327	57500000000000	2.24277e+14	108891288550000	7.88995e+13	58950255225000	47765606500000	39549042225000	33860980650000	2.83292e+13	24041212300000	2.06072e+13	17599395300000	14470273475000	1.17872e+13	9479197000000	7348053800000	5507680050000	3778466450000	2130609025000
74	328	62500000000000	2.4378e+14	118360096250000	8.57603e+13	64076364375000	51919137500000	42988089375000	36805413750000	3.07926e+13	26131752500000	2.23991e+13	19129777500000	15728558125000	1.28122e+13	10303475000000	7987015000000	5.98661e+12	4107028750000	2315879375000
74	329	68300000000000	2.66402e+14	129343913182000	9.37189e+13	70022650989000	5.67372e+13	46977384069000	40220956146000	3.36502e+13	28556779132000	2.44778e+13	20905020852000	17188168319000	1.40012e+13	11259637480000	8728209992000	6.54217e+12	4488161018000	2530792981000
74	330	65800000000000	2.56651e+14	124609509332000	9.02884e+13	67459596414000	5.46605e+13	45257860494000	38748739596000	3.24185e+13	27511509032000	2.35818e+13	20139829752000	16559025994000	1.34887e+13	10847498480000	8408729392000	6.3027e+12	4323879868000	2438157806000
74	331	66000000000000	2.57431e+14	124988261640000	9.05629e+13	67664640780000	5.48266e+13	45395422380000	38866516920000	3.2517e+13	27595130640000	2.36535e+13	20201045040000	16609357380000	1.35297e+13	10880469600000	8434287840000	6.32186e+12	4337022360000	2445568620000
74	332	67400000000000	2.62892e+14	127639527796000	9.24839e+13	69099951342000	5.59896e+13	46358355582000	39690958188000	3.32067e+13	28180481896000	2.41552e+13	20629552056000	16961677082000	1.38167e+13	11111267440000	8613196976000	6.45596e+12	4429019804000	2497444318000
74	333	67500000000000	2.63282e+14	127828903950000	9.26211e+13	69202473525000	5.60727e+13	46427136525000	39749846850000	3.3256e+13	28222292700000	2.41911e+13	20660159700000	16986842775000	1.38372e+13	11127753000000	8625976200000	6.46554e+12	4435591050000	2501149725000
74	334	70000000000000	2.73033e+14	132563307800000	9.60515e+13	71765528100000	5.81494e+13	4.81467e+13	41222063400000	3.44877e+13	29267562800000	2.5087e+13	21425350800000	17615985100000	1.43497e+13	11539892000000	8945456800000	6.705e+12	4599872200000	2593784900000
74	335	68400000000000	2.72565e+14	145425024540000	111985341840000	88751485656000	7.49835e+13	6.4441e+13	56749752216000	48828181320000	42390473868000	3.69582e+13	3.20626e+13	26818184448000	2.21485e+13	1.80045e+13	14094008784000	10647478476000	7350307092000	4162808268000
74	336	64700000000000	2.57821e+14	1.37558e+14	105927655220000	83950601198000	7.09274e+13	6.09551e+13	53679955678000	46186890810000	40097421919000	3.4959e+13	3.03282e+13	25367493184000	20950420302000	1.70306e+13	13331613572000	10071518383000	6952702761000	3937627119000
74	337	67900000000000	2.70573e+14	144361976115000	111166735540000	88102717486000	7.44354e+13	6.39699e+13	56334914846000	48471250170000	42080601983000	3.6688e+13	3.18282e+13	26622145088000	2.19866e+13	1.78729e+13	13990982404000	10569646031000	7296576777000	4132378383000
74	338	74000000000000	294880300820000	157331166900000	121153732400000	96017689160000	8.11226e+13	6.97168e+13	61395930760000	52825810200000	45861038980000	3.9984e+13	3.46876e+13	29013825280000	2.39618e+13	1.94786e+13	15247904240000	11519201860000	7952086620000	4503622980000
74	339	78300000000000	312015237219000	166473383355000	128193746580000	101597095422000	8.58364e+13	73767960765000	64963532142000	5.58954e+13	48525937191000	4.23074e+13	36703236969000	30699763776000	2.53542e+13	2.06105e+13	16133931108000	12188560887000	8414167329000	4765319991000
74	340	78500000000000	312812211005000	166898602725000	128521189100000	101856602690000	8.60557e+13	73956384675000	65129467090000	5.60382e+13	48649885945000	4.24154e+13	36796987255000	30778179520000	2.5419e+13	2.06631e+13	16175141660000	12219693865000	8435659455000	4777491945000
74	341	79200000000000	315601619256000	168386870520000	129667237920000	102764878128000	8.68231e+13	74615868360000	65710239408000	5.65379e+13	49083706584000	4.27937e+13	37125113256000	31052634624000	2.56456e+13	2.08474e+13	16319378592000	12328659288000	8510881896000	4820093784000
74	342	80600000000000	321180435758000	171363406110000	131959335560000	104581429004000	8.83578e+13	75934835730000	66871784044000	5.75373e+13	49951347862000	4.35501e+13	37781365258000	31601544832000	2.6099e+13	2.12159e+13	16607852456000	12546590134000	8661326778000	4905297462000
74	343	74800000000000	298068195964000	159032044380000	122463502480000	97055718232000	8.19996e+13	70470542340000	62059670552000	53396900040000	46356833996000	4.04162e+13	3.50626e+13	29327488256000	2.42209e+13	1.96892e+13	15412746448000	11643733772000	8038055124000	4552310796000
74	344	74000000000000	294880300820000	157331166900000	121153732400000	96017689160000	8.11226e+13	6.97168e+13	61395930760000	52825810200000	45861038980000	3.9984e+13	3.46876e+13	29013825280000	2.39618e+13	1.94786e+13	15247904240000	11519201860000	7952086620000	4503622980000
74	345	78000000000000	310819776540000	165835554300000	127702582800000	101207834520000	8.55076e+13	73485324900000	64714629720000	5.56813e+13	48340014060000	4.21453e+13	36562611540000	30582140160000	2.52571e+13	2.05315e+13	16072115280000	12141861420000	8381929140000	4747062060000
74	346	78200000000000	311616750326000	166260773670000	128030025320000	101467341788000	8.57268e+13	73673748810000	64880564668000	5.5824e+13	48463962814000	4.22533e+13	36656361826000	30660555904000	2.53218e+13	2.05841e+13	16113325832000	12172994398000	8403421266000	4759234014000
74	347	78400000000000	312413724112000	166685993040000	128357467840000	101726849056000	8.59461e+13	73862172720000	65046499616000	5.59668e+13	48587911568000	4.23614e+13	36750112112000	30738971648000	2.53866e+13	2.06368e+13	16154536384000	12204127376000	8424913392000	4771405968000
74	348	78700000000000	313609184791000	167323822095000	128848631620000	102116109958000	8.62749e+13	74144808585000	65295402038000	5.6181e+13	48773834699000	4.25235e+13	36890737541000	30856595264000	2.54837e+13	2.07157e+13	16216352212000	12250826843000	8457151581000	4789663899000
74	349	78900000000000	314406158577000	167749041465000	129176074140000	102375617226000	8.64942e+13	74333232495000	65461336986000	5.63237e+13	48897783453000	4.26316e+13	36984487827000	30935011008000	2.55485e+13	2.07684e+13	16257562764000	12281959821000	8478643707000	4801835853000
74	350	0	0	0	0	0	0	0	0	0	0	0	0	0	0	0	0	0	0	0
73	280	0	0	0	0	0	0	0	0	0	0	0	0	0	0	0	0	0	0	0
73	281	0	0	0	0	0	0	0	0	0	0	0	0	0	0	0	0	0	0	0
73	282	0	0	0	0	0	0	0	0	0	0	0	0	0	0	0	0	0	0	0
73	283	0	0	0	0	0	0	0	0	0	0	0	0	0	0	0	0	0	0	0
73	284	0	0	0	0	0	0	0	0	0	0	0	0	0	0	0	0	0	0	0
73	285	0	0	0	0	0	0	0	0	0	0	0	0	0	0	0	0	0	0	0
73	286	0	0	0	0	0	0	0	0	0	0	0	0	0	0	0	0	0	0	0
73	287	0	0	0	0	0	0	0	0	0	0	0	0	0	0	0	0	0	0	0
73	288	0	0	0	0	0	0	0	0	0	0	0	0	0	0	0	0	0	0	0
73	289	0	0	0	0	0	0	0	0	0	0	0	0	0	0	0	0	0	0	0
73	290	0	0	0	0	0	0	0	0	0	0	0	0	0	0	0	0	0	0	0
73	291	149000000000	567410458120	243726279160	165016811620	1.14856e+11	88553131680	70059381310	5.7925e+10	46847916950	38667751390	32395237300	27077510740	2.17576e+10	17393400270	1.37905e+10	10551861140	7826183280	5324060550	2984477450
73	292	0	0	0	0	0	0	0	0	0	0	0	0	0	0	0	0	0	0	0
73	293	0	0	0	0	0	0	0	0	0	0	0	0	0	0	0	0	0	0	0
73	294	149000000000	567410458120	243726279160	165016811620	1.14856e+11	88553131680	70059381310	5.7925e+10	46847916950	38667751390	32395237300	27077510740	2.17576e+10	17393400270	1.37905e+10	10551861140	7826183280	5324060550	2984477450
73	295	0	0	0	0	0	0	0	0	0	0	0	0	0	0	0	0	0	0	0
73	296	261000000000	993920332680	426929925240	289056294180	2.01191e+11	155116559520	122721466590	1.01466e+11	82062458550	67733443710	56746019700	47431075860	3.81123e+10	30467634030	2.41565e+10	18483461460	13708951920	9326038950	5227843050
73	297	24800000000	94441472224	40566521632	27465885424	19116985264	14739044736	11660890312	9641209312	7797505640	6435974728	5391958960	4506860848	3.6214e+09	2895008904	2.29533e+09	1756282928	1302613056	886152360	496745240
73	298	228000000000	868252244640	372950279520	252508946640	175752929040	135504120960	107204959320	8.86369e+10	71686745400	59169445080	49571235600	41434043280	3.32935e+10	26615404440	2.11022e+10	16146472080	11975636160	8146884600	4566851400
73	299	90200000000	343492773976	147544364968	99896083276	69530325436	53607332064	42411786538	35066011288	28360282610	23408262922	19611076540	16391889052	1.31714e+10	10529427546	8.34833e+09	6387770972	4737729744	3223021890	1806710510
73	300	146000000000	555986086480	238819038640	161694325480	1.12544e+11	86770182720	68648789740	5.67587e+10	45904670300	37889206060	31742984200	26532325960	2.13195e+10	17043197580	1.35128e+10	10339407560	7668609120	5216864700	2924387300
73	301	554000000000	2109700629520	906203749360	613552440520	4.27049e+11	329251241280	260489243260	2.15372e+11	174186214700	143771370940	120449405800	100677456040	8.08974e+10	64670763420	5.12746e+10	39233094440	29098694880	19795500300	11096647700
73	302	236000000000	9.08165e+11	412349850680	2.87364e+11	206776943640	162860506040	1.31413e+11	110315545000	90585454120	7.57094e+10	64066596680	54057839040	43910289800	35419193880	28264886920	2.17562e+10	16214481480	1.10733e+10	6.22415e+09
73	303	509000000000	1.95871e+12	889347771170	6.1978e+11	445972306410	351254227010	2.83428e+11	237926323750	195372865030	1.63288e+11	138177532670	116590847760	94704819950	76391396970	60961133230	4.69233e+10	34971063870	2.38826e+10	1.34241e+10
73	304	421000000000	1.62007e+12	735590199730	5.12628e+11	368869039290	290526580690	2.34427e+11	196791713750	161595238070	1.35058e+11	114288293230	96433687440	78331491550	6.31842e+10	50421683870	3.88109e+10	28924986030	1.97536e+10	1.11033e+10
73	305	335000000000	1.28913e+12	585327118550	4.0791e+11	293518119150	231179108150	1.86539e+11	156591981250	128585284450	1.07469e+11	90941991050	76734644400	62330284250	5.02772e+10	40121767450	3.08828e+10	23016319050	1.57184e+10	8835129200
73	306	264000000000	1.01591e+12	461272714320	3.21458e+11	231309801360	182182938960	1.47004e+11	123403830000	101332880880	8.46919e+10	71667718320	60471480960	49119985200	39621471120	31618348080	2.43375e+10	18138233520	1.2387e+10	6.96261e+09
73	307	818000000000	3.14779e+12	1429246516340	9.96032e+11	716709914820	564491076020	4.55489e+11	382364897500	313978396060	2.62416e+11	222061339340	187369967520	152197529900	1.22767e+11	97968972460	7.54092e+10	56201041740	3.8381e+10	2.15735e+10
73	308	1100000000000	4.23297e+12	1921969643000	1.33941e+12	963790839000	759095579000	6.12516e+11	514182625000	422220337000	3.52883e+11	298615493000	251964504000	204666605000	165089463000	131743117000	1.01406e+11	75575973000	5.16126e+10	2.90109e+10
73	309	2270000000000	8.78171e+12	4084471972200	2889809766500	2108015274300	1681073470000	1.37193e+12	1161738942900	961264710100	808447946900	687562252200	582890304900	475520553400	384844904000	3.08088e+11	237834687300	177671742300	121564674400	68420274300
73	310	3660000000000	14159049025800	6585536307600	4659340857000	3398826389400	2710453260000	2212014403200	1873112128200	1549880545800	1303488760200	1108580547600	9.39814e+11	766698337200	620498832000	4.96741e+11	383469143400	286466333400	196002955200	110316389400
73	311	4910000000000	18994789813300	8834694882600	6250645794500	4559627751900	3636154510000	2.96748e+12	2512836215700	2079211333300	1748669347700	1487194122600	1260789161700	1028548862200	832417832000	6.66393e+11	514435380900	384303195900	262943855200	147992751900
73	312	13100000000000	50678563453000	23571181866000	1.66769e+13	12165198279000	9701349100000	7.91732e+12	6704308437000	5547386653000	4665492557000	3967870266000	3.36382e+12	2744193502000	2220911120000	1.77795e+12	1372526169000	1025330319000	701540632000	394848279000
73	313	19700000000000	76211274811000	35446739142000	25078965815000	18294229473000	14589051700000	1.19062e+13	10082051619000	8342253211000	7016046059000	5966949942000	5058563439000	4126764274000	3339843440000	2.67371e+12	2064027903000	1541908953000	1054988584000	593779473000
73	314	21400000000000	82787882282000	38505594804000	27243140530000	19872919326000	15848005400000	1.29336e+13	10952076378000	9062143082000	7621491658000	6481864404000	5495089218000	4482880988000	3628053280000	2.90444e+12	2242141986000	1674967086000	1146028208000	645019326000
73	315	23100000000000	9.0101e+13	43745891574000	3.1697e+13	23682624273000	19189313220000	1.58884e+13	13603280922000	11380946577000	9658295724000	8.27872e+12	7070365764000	5813275083000	4735396743000	3808164360000	2952000744000	2212650594000	1517957826000	855949017000
73	316	26400000000000	1.02973e+14	49995304656000	3.62252e+13	27065856312000	21930643680000	18158168952000	15546606768000	1.30068e+13	11038052256000	9.46139e+12	8080418016000	6643742952000	5.41188e+12	4352187840000	3373715136000	2528743536000	1734808944000	978227448000
73	317	28800000000000	1.12334e+14	54540332352000	3.95183e+13	29526388704000	23924338560000	19808911584000	16959934656000	1.41892e+13	12041511552000	1.03215e+13	8815001472000	7247719584000	5.90387e+12	4747841280000	3680416512000	2758629312000	1892518848000	1067157216000
73	318	31600000000000	1.23255e+14	59842864664000	4.33604e+13	32397009828000	26250315920000	21734777988000	18608817192000	1.55687e+13	13212214064000	1.1325e+13	9672015504000	7952358988000	6.47786e+12	5209436960000	4038234784000	3.02683e+12	2076513736000	1170908612000
73	319	34900000000000	1.36127e+14	66092277746000	4.78886e+13	35780241867000	2.89916e+13	2.40045e+13	20552143038000	1.71946e+13	14591970596000	1.25077e+13	10682067756000	8782826857000	7.15434e+12	5753460440000	4459949176000	3.34292e+12	2293364854000	1293187043000
73	320	38100000000000	1.48608e+14	72152314674000	5.22795e+13	39060951723000	3.16499e+13	2.62055e+13	22436580222000	18771171627000	15929916324000	1.36545e+13	11661512364000	9588129033000	7.81033e+12	6280998360000	4868884344000	3.64944e+12	2503644726000	1411760067000
73	321	38200000000000	1.48998e+14	72341690828000	5.24167e+13	39163473906000	3.1733e+13	2.62743e+13	22495468884000	18820439794000	15971727128000	1.36904e+13	11692120008000	9613294726000	7.83083e+12	6297483920000	4881663568000	3.65902e+12	2510215972000	1415465474000
73	322	39200000000000	1.52899e+14	74235452368000	5.37889e+13	40188695736000	3.25637e+13	2.69621e+13	23084355504000	19313121464000	16389835168000	1.40487e+13	11998196448000	9864951656000	8.03582e+12	6462339520000	5009455808000	3.7548e+12	2575928432000	1452519544000
73	323	44800000000000	1.74741e+14	84840516992000	6.1473e+13	45929937984000	37215637760000	3.08139e+13	26382120576000	22072138816000	18731240192000	1.60557e+13	13712224512000	11274230464000	9183799744000	7385530880000	5725092352000	4.2912e+12	2943918208000	1660022336000
73	324	50400000000000	1.96584e+14	95445581616000	6.91571e+13	51671180232000	41867592480000	3.46656e+13	29679885648000	2.48312e+13	21072645216000	1.80627e+13	15426252576000	12683509272000	10331774712000	8308722240000	6440728896000	4827601296000	3311907984000	1867525128000
73	325	59200000000000	2.30908e+14	112110683168000	8.12322e+13	60693132336000	49177807040000	40718318256000	34862087904000	2.91668e+13	24751995968000	2.12165e+13	18119725248000	14898090256000	1.21357e+13	9759451520000	7565300608000	5670515808000	3890177632000	2193600944000
73	326	65000000000000	2.53531e+14	123094500100000	8.91907e+13	66639418950000	5.39959e+13	44707612950000	38277630300000	3.20243e+13	27177022600000	2.32951e+13	19894968600000	16357700450000	1.33247e+13	10715614000000	8306495600000	6.22607e+12	4271309900000	2408514550000
73	327	64500000000000	2.51581e+14	122147619330000	8.85046e+13	66126808035000	5.35805e+13	44363708235000	37983186990000	3.1778e+13	26967968580000	2.31159e+13	19741930380000	16231871985000	1.32222e+13	10633186200000	8242599480000	6.17818e+12	4238453670000	2389987515000
73	328	70100000000000	2.73423e+14	132752683954000	9.61888e+13	71868050283000	5.82325e+13	4.82154e+13	41280952062000	3.4537e+13	29309373604000	2.51229e+13	21455958444000	17641150793000	1.43702e+13	11556377560000	8958236024000	6.71458e+12	4606443446000	2597490307000
73	329	76500000000000	2.98386e+14	144872757810000	1.04971e+14	78429469995000	6.3549e+13	5.26174e+13	45049826430000	37690147755000	31985265060000	2.74165e+13	23414847660000	19251755145000	1.56822e+13	12611453400000	9776106360000	7.32761e+12	5027003190000	2834636355000
73	330	73700000000000	2.87465e+14	139570225498000	1.01129e+14	75558848871000	6.1223e+13	5.06916e+13	43400943894000	36310639079000	30814562548000	2.64131e+13	22557833628000	18547115741000	1.51082e+13	12149857720000	9418288088000	7.05941e+12	4843008302000	2730884959000
73	331	73900000000000	2.88245e+14	139948977806000	1.01403e+14	75763893237000	6.13892e+13	5.08291e+13	43518721218000	36409175413000	30898184156000	2.64847e+13	22619048916000	18597447127000	1.51492e+13	12182828840000	9443846536000	7.07857e+12	4856150794000	2738295773000
73	332	75400000000000	2.94096e+14	142789620116000	1.03461e+14	77301725982000	6.26352e+13	5.18608e+13	44402051148000	37148197918000	31525346216000	2.70223e+13	23078163576000	18974932522000	1.54567e+13	12430112240000	9635534896000	7.22224e+12	4954719484000	2793876878000
73	333	75500000000000	2.94486e+14	142978996270000	1.03598e+14	77404248165000	6.27183e+13	5.19296e+13	44460939810000	37197466085000	31567157020000	2.70582e+13	23108771220000	19000098215000	1.54772e+13	12446597800000	9648314120000	7.23182e+12	4961290730000	2797582285000
73	334	78300000000000	3.05407e+14	148281528582000	1.07441e+14	80274869289000	6.50443e+13	5.38555e+13	46109822346000	38576974761000	32737859532000	2.80616e+13	23965785252000	19704737619000	1.60511e+13	12908193480000	10006132392000	7.50002e+12	5145285618000	2901333681000
73	335	76300000000000	304045499359000	162221189655000	124919321380000	99002022742000	8.36439e+13	71883721665000	63304182662000	54467693490000	47286449651000	4.12267e+13	35765734109000	29915606336000	2.47066e+13	2.0084e+13	15721825588000	11877231107000	8199246069000	4643600451000
73	336	72300000000000	288106023639000	153716802255000	118370470980000	93811877382000	7.92589e+13	6.81152e+13	59985483702000	51612244290000	44807474571000	3.90654e+13	3.38907e+13	28347291456000	2.34114e+13	1.90311e+13	14897614548000	11254571547000	7769403549000	4400161371000
73	337	76000000000000	302850038680000	161583360600000	124428157600000	98612761840000	8.33151e+13	71601085800000	63055280240000	54253534800000	47100526520000	4.10646e+13	35625108680000	29797982720000	2.46095e+13	2.0005e+13	15660009760000	11830531640000	8167007880000	4625342520000
73	338	82700000000000	329548660511000	175828209495000	135397482020000	107306255318000	9.06599e+13	77913286785000	68614100998000	5.90364e+13	51252809779000	4.46848e+13	38765743261000	32424910144000	2.6779e+13	2.17686e+13	17040563252000	12873486403000	8886994101000	5033102979000
73	339	87600000000000	349074518268000	186246084060000	143419823760000	113664183384000	9.60316e+13	82529672580000	72679507224000	6.25343e+13	54289554252000	4.73324e+13	41062625268000	34346095872000	2.83656e+13	2.30584e+13	18050221776000	13636244364000	9413551188000	5331315852000
73	340	87700000000000	349473005161000	186458693745000	143583545020000	113793937018000	9.61412e+13	82623884535000	72762474698000	6.26057e+13	54351528629000	4.73864e+13	41109500411000	34385303744000	2.8398e+13	2.30848e+13	18070827052000	13651810853000	9424297251000	5337401829000
73	341	88600000000000	353059387198000	188372180910000	145057036360000	114961719724000	9.71278e+13	83471792130000	73509181964000	6.32482e+13	54909298022000	4.78727e+13	41531376698000	34738174592000	2.86894e+13	2.33217e+13	18256274536000	13791909254000	9521011818000	5392175622000
73	342	90100000000000	359036690593000	191561326185000	147512855260000	116908024234000	9.87722e+13	84884971455000	74753694074000	6.4319e+13	55838913677000	4.86832e+13	42234503843000	35326292672000	2.91752e+13	2.37165e+13	18565353676000	14025406589000	9682202763000	5483465277000
73	343	83500000000000	332736555655000	177529086975000	136707252100000	108344284390000	9.15369e+13	78666982425000	69277840790000	5.96075e+13	51748604795000	4.51171e+13	39140744405000	32738573120000	2.7038e+13	2.19792e+13	17205405460000	12998018315000	8972962605000	5081790795000
73	344	82700000000000	329548660511000	175828209495000	135397482020000	107306255318000	9.06599e+13	77913286785000	68614100998000	5.90364e+13	51252809779000	4.46848e+13	38765743261000	32424910144000	2.6779e+13	2.17686e+13	17040563252000	12873486403000	8886994101000	5033102979000
73	345	87200000000000	347480570696000	185395645320000	142764938720000	113145168848000	9.55931e+13	82152824760000	72347637328000	6.22488e+13	54041656744000	4.71163e+13	40875124696000	34189264384000	2.82361e+13	2.29531e+13	17967800672000	13573978408000	9370566936000	5306971944000
73	346	87400000000000	348277544482000	185820864690000	143092381240000	113404676116000	9.58123e+13	82341248670000	72513572276000	6.23916e+13	54165605498000	4.72243e+13	40968874982000	34267680128000	2.83009e+13	2.30058e+13	18009011224000	13605111386000	9392059062000	5319143898000
73	347	87700000000000	349473005161000	186458693745000	143583545020000	113793937018000	9.61412e+13	82623884535000	72762474698000	6.26057e+13	54351528629000	4.73864e+13	41109500411000	34385303744000	2.8398e+13	2.30848e+13	18070827052000	13651810853000	9424297251000	5337401829000
73	348	87900000000000	350269978947000	186883913115000	143910987540000	114053444286000	9.63604e+13	82812308445000	72928409646000	6.27485e+13	54475477383000	4.74945e+13	41203250697000	34463719488000	2.84628e+13	2.31374e+13	18112037604000	13682943831000	9445789377000	5349573783000
73	349	88200000000000	351465439626000	187521742170000	144402151320000	114442705188000	9.66893e+13	83094944310000	73177312068000	6.29627e+13	54661400514000	4.76566e+13	41343876126000	34581343104000	2.85599e+13	2.32164e+13	18173853432000	13729643298000	9478027566000	5367831714000
73	350	0	0	0	0	0	0	0	0	0	0	0	0	0	0	0	0	0	0	0
72	280	0	0	0	0	0	0	0	0	0	0	0	0	0	0	0	0	0	0	0
72	281	0	0	0	0	0	0	0	0	0	0	0	0	0	0	0	0	0	0	0
72	282	0	0	0	0	0	0	0	0	0	0	0	0	0	0	0	0	0	0	0
72	283	0	0	0	0	0	0	0	0	0	0	0	0	0	0	0	0	0	0	0
72	284	0	0	0	0	0	0	0	0	0	0	0	0	0	0	0	0	0	0	0
72	285	0	0	0	0	0	0	0	0	0	0	0	0	0	0	0	0	0	0	0
72	286	0	0	0	0	0	0	0	0	0	0	0	0	0	0	0	0	0	0	0
72	287	0	0	0	0	0	0	0	0	0	0	0	0	0	0	0	0	0	0	0
72	288	0	0	0	0	0	0	0	0	0	0	0	0	0	0	0	0	0	0	0
72	289	0	0	0	0	0	0	0	0	0	0	0	0	0	0	0	0	0	0	0
72	290	0	0	0	0	0	0	0	0	0	0	0	0	0	0	0	0	0	0	0
72	291	182000000000	693078546160	297705924880	201564159160	140294004760	108165570240	85575888580	70754036080	57223630100	47231750020	39570021400	33074543320	2.65764e+10	21245629860	1.68447e+10	12888850520	9559499040	6503214900	3645469100
72	292	0	0	0	0	0	0	0	0	0	0	0	0	0	0	0	0	0	0	0
72	293	0	0	0	0	0	0	0	0	0	0	0	0	0	0	0	0	0	0	0
72	294	71900000000	273804106972	117610197796	79628917822	5.54238e+10	42731343408	33807177961	2.79517e+10	22606478045	18659136409	15632332630	13066261894	1.04991e+10	8393191137	6.6546e+09	5091804134	3776527368	2569127205	1440160595
72	295	0	0	0	0	0	0	0	0	0	0	0	0	0	0	0	0	0	0	0
72	296	179000000000	681654174520	292798684360	198241673020	137981466220	106382621280	84165297010	69587760760	56280383450	46453204690	38917768300	32529358540	2.61383e+10	20895427170	1.65671e+10	12676396940	9401924880	6396019050	3585378950
72	297	98400000000	374719389792	160957489056	108977545392	75851264112	58480725888	46267403496	38253830496	30938490120	25536286824	21393901680	17882060784	1.43688e+10	11486648232	9.10726e+09	6968477424	5168432448	3516023880	1970956920
72	298	206000000000	784473519280	336963849040	228144048280	158794313080	122429161920	96860621140	8.00842e+10	64769603300	53460112660	44788046200	37436021560	3.0081e+10	24047251380	1.9066e+10	14588479160	10820092320	7360781700	4126190300
72	299	162000000000	616916068560	264990988080	179414251560	1.24877e+11	96279243840	76171944780	6.29789e+10	50935319100	42041447820	35221667400	29439978120	2.36559e+10	18910945260	1.49937e+10	11472493320	8.509e+09	5788575900	3244868100
72	300	191000000000	727351661080	312427646440	211531617580	147231620380	113514417120	89807663290	74252862040	60053370050	49567386010	41526780700	34710097660	2.78906e+10	22296237930	1.76777e+10	13526211260	10032221520	6824802450	3825739550
72	301	536000000000	2041154399680	876760306240	593617523680	4.13174e+11	318553547520	252025693840	2.08375e+11	168526734800	139100098960	116535887200	97406347360	7.8269e+10	62569547280	4.96087e+10	37958372960	28153249920	19152325200	10736106800
72	302	245000000000	9.42798e+11	428075056850	2.98322e+11	214662505050	169071288050	1.36424e+11	114522493750	94039984150	7.85966e+10	66509814350	56119366800	45584834750	36769925850	29342785150	2.25859e+10	16832830350	1.14955e+10	6.46151e+09
72	303	541000000000	2.08185e+12	945259615330	6.58745e+11	474009858090	373337007490	3.01247e+11	252884363750	207655638470	1.73554e+11	146864528830	123920724240	100658757550	81193999530	64793660270	4.98733e+10	37169637630	2.5384e+10	1.42681e+10
72	304	537000000000	2.06646e+12	938270634810	6.53874e+11	470505164130	370576659930	2.99019e+11	251014608750	206120291790	1.72271e+11	145778654310	123004489680	99914515350	80593674210	64314594390	4.95046e+10	36894815910	2.51963e+10	1.41626e+10
72	305	593000000000	2.28196e+12	1036116362090	7.22062e+11	519570879570	409221525770	3.30202e+11	277191178750	227615145310	1.90236e+11	160980897590	135831773520	110333906150	88998228690	71021516710	5.46671e+10	40742319990	2.78239e+10	1.56395e+10
72	306	596000000000	2.2935e+12	1041358097480	7.25715e+11	522199400040	411291786440	3.31872e+11	278593495000	228766655320	1.91198e+11	161795303480	136518949440	110892087800	89448472680	71380816120	5.49436e+10	40948436280	2.79647e+10	1.57186e+10
72	307	1170000000000	4.50234e+12	2044276802100	1.42464e+12	1025122983300	807401661300	6.51494e+11	546903337500	449088903900	3.75339e+11	317618297100	267998608800	217690843500	175595156100	140126769900	1.07859e+11	80385353100	5.48971e+10	3.0857e+10
72	308	1700000000000	6.54187e+12	2970316721000	2.06999e+12	1489494933000	1173147713000	9.46616e+11	794645875000	652522339000	5.45364e+11	461496671000	389399688000	316302935000	2.55138e+11	203602999000	1.56718e+11	116799231000	7.9765e+10	4.4835e+10
72	309	3100000000000	11992637153000	5577913266000	3946436245000	2878787379000	2295739100000	1.87356e+12	1586515737000	1312740353000	1104047857000	938961666000	7.96018e+11	649389302000	525559120000	4.20737e+11	324796269000	242635419000	166013432000	93437379000
72	310	4330000000000	1.6751e+13	7791085303800	5512280303500	4021015919700	3206629130000	2616946001600	2216004239100	1833601847900	1542105555100	1311517423800	1111856837100	907050218600	734087416000	587674398100	453667046700	338906891700	231883277600	130510919700
72	311	10700000000000	41393941141000	19252797402000	13621570265000	9936459663000	7924002700000	6.46682e+12	5476038189000	4531071541000	3810745829000	3240932202000	2747544609000	2241440494000	1814026640000	1.45222e+12	1121070993000	837483543000	573014104000	322509663000
72	312	18700000000000	72342682181000	33647412282000	23805921865000	1.73656e+13	13848490700000	1.13018e+13	9570272349000	7918788581000	6659901589000	5664059082000	4801783569000	3917283854000	3170308240000	2.53799e+12	1959254913000	1463639463000	1001435864000	563638383000
72	313	21200000000000	82014163756000	38145729432000	26988531740000	19687191108000	15699893200000	1.28128e+13	10849720524000	8977450156000	7550262764000	6421286232000	5443733244000	4440984904000	3594146240000	2.8773e+12	2221187388000	1659313188000	1135317664000	638991108000
72	314	23100000000000	89364489753000	41564450466000	29407315245000	21451609179000	17106959100000	1.39611e+13	11822101137000	9782032953000	8226937257000	6996778866000	5.93161e+12	4838997702000	3916263120000	3.13517e+12	2420256069000	1808025219000	1237067832000	696259179000
72	315	25200000000000	9.8292e+13	47722790808000	3.45786e+13	25835590116000	20933796240000	1.73328e+13	14839942824000	1.24156e+13	10536322608000	9.03133e+12	7713126288000	6341754636000	5165887356000	4154361120000	3220364448000	2413800648000	1655953992000	933762564000
72	316	29000000000000	1.13114e+14	54919084660000	3.97928e+13	29731433070000	24090479800000	19946473470000	17077711980000	1.42878e+13	12125133160000	1.03932e+13	8876216760000	7298050970000	5.94487e+12	4780812400000	3705974960000	2777786460000	1905661340000	1074568030000
72	317	31800000000000	1.24035e+14	60221616972000	4.36348e+13	32602054194000	26416457160000	21872339874000	18726594516000	1.56673e+13	13295835672000	1.13967e+13	9733230792000	8002690374000	6.51886e+12	5242408080000	4063793232000	3.04599e+12	2089656228000	1178319426000
72	318	34900000000000	1.36127e+14	66092277746000	4.78886e+13	35780241867000	2.89916e+13	2.40045e+13	20552143038000	1.71946e+13	14591970596000	1.25077e+13	10682067756000	8782826857000	7.15434e+12	5753460440000	4459949176000	3.34292e+12	2293364854000	1293187043000
72	319	38800000000000	1.51338e+14	73477947752000	5.324e+13	39778607004000	3.22314e+13	2.6687e+13	22848800856000	19116048796000	16222591952000	1.39054e+13	11875765872000	9764288884000	7.95383e+12	6396397280000	4958338912000	3.71649e+12	2549643448000	1437697916000
72	320	42300000000000	1.6499e+14	80106113142000	5.80426e+13	43366883409000	3.51389e+13	2.90943e+13	24909904026000	20840434641000	17685970092000	1.51597e+13	12947033412000	10645088139000	8.67131e+12	6973391880000	5405611752000	4.05174e+12	2779637058000	1567387161000
72	321	42400000000000	1.6538e+14	80295489296000	5.81798e+13	43469405592000	35221942880000	2.91631e+13	24968792688000	20889702808000	17727780896000	1.51956e+13	12977641056000	10670253832000	8.69181e+12	6989877440000	5418390976000	4.06132e+12	2786208304000	1571092568000
72	322	43500000000000	1.69671e+14	82378626990000	5.96892e+13	44597149605000	36135719700000	2.99197e+13	25616567970000	21431652645000	18187699740000	1.55898e+13	13314325140000	10947076455000	8917305555000	7171218600000	5558962440000	4.16668e+12	2858492010000	1611852045000
72	323	49900000000000	1.94634e+14	94498700846000	6.8471e+13	51158569317000	41452239380000	3.43217e+13	29385442338000	2.45848e+13	20863591196000	1.78835e+13	15273214356000	12557680807000	10229276947000	8226294440000	6376832776000	4779708426000	3279051754000	1848998093000
72	324	56300000000000	2.19597e+14	106618774702000	7.72529e+13	57719989029000	46768759060000	38723670909000	33154316706000	2.7738e+13	23539482652000	2.01771e+13	17232103572000	14168285159000	1.15412e+13	9281370280000	7194703112000	5392737162000	3699611498000	2086144141000
72	325	66300000000000	2.58602e+14	125556390102000	9.09745e+13	67972207329000	5.50758e+13	45601765209000	39043182906000	3.26648e+13	27720563052000	2.3761e+13	20292867972000	16684854459000	1.35912e+13	10929926280000	8472625512000	6.35059e+12	4356736098000	2456684841000
72	326	72700000000000	2.83565e+14	137676463958000	9.97564e+13	74533627041000	6.03923e+13	5.00037e+13	42812057274000	35817957409000	30396454508000	2.60547e+13	22251757188000	18295458811000	1.49032e+13	11985002120000	9290495848000	6.96362e+12	4777295842000	2693830889000
72	327	72200000000000	2.81614e+14	136729583188000	9.90703e+13	74021016126000	5.9977e+13	4.96598e+13	42517613964000	35571616574000	30187400488000	2.58755e+13	22098718968000	18169630346000	1.48007e+13	11902574320000	9226599728000	6.91573e+12	4744439612000	2675303854000
72	328	78600000000000	3.06577e+14	148849657044000	1.07852e+14	80582435838000	6.52935e+13	5.40618e+13	46286488332000	38724779262000	32863291944000	2.81692e+13	24057608184000	19780234698000	1.61126e+13	12957650160000	10044470064000	7.52876e+12	5164999356000	2912449902000
72	329	85700000000000	3.34271e+14	162295363978000	1.17595e+14	87861510831000	71191521340000	5.89453e+13	50467583334000	42222819119000	35831859028000	3.07137e+13	26230750908000	21566998901000	1.75681e+13	14128124920000	10951794968000	8.20884e+12	5631557822000	3175533799000
72	330	82600000000000	3.22179e+14	156424703204000	1.13341e+14	84683323158000	6.86163e+13	5.68131e+13	48642034812000	40695505942000	34535724104000	2.96027e+13	25281913944000	20786862418000	1.69326e+13	13617072560000	10555639024000	7.9119e+12	5427849196000	3060666182000
72	331	82900000000000	3.23349e+14	156992831666000	1.13752e+14	84990889707000	6.88655e+13	5.70194e+13	48818700798000	40843310443000	34661156516000	2.97102e+13	25373736876000	20862359497000	1.69941e+13	13666529240000	10593976696000	7.94064e+12	5447562934000	3071782403000
72	332	84400000000000	3.292e+14	159833473976000	1.15811e+14	86528722452000	7.01116e+13	5.80511e+13	49702030728000	41582332948000	35288318576000	3.02478e+13	25832851536000	21239844892000	1.73016e+13	13913812640000	10785665056000	8.08432e+12	5546131624000	3127363508000
72	333	84700000000000	3.3037e+14	160401602438000	1.16222e+14	86836289001000	7.03608e+13	5.82575e+13	49878696714000	41730137449000	35413750988000	3.03553e+13	25924674468000	21315341971000	1.73631e+13	13963269320000	10824002728000	8.11305e+12	5565845362000	3138479729000
72	334	87700000000000	3.42072e+14	166082887058000	1.20339e+14	89911954491000	72852933740000	6.03209e+13	51645356574000	43208182459000	36668075108000	3.14305e+13	26842903788000	22070312761000	17978107981000	14457836120000	11207379448000	8.40041e+12	5762982742000	3249641939000
72	335	85400000000000	340307806622000	181568670990000	139817956040000	110809603436000	9.36198e+13	80457009570000	70854222796000	6.09638e+13	52926117958000	4.61437e+13	40031372122000	33483522688000	2.76533e+13	2.24793e+13	17596905704000	13293781606000	9177137802000	5197424358000
72	336	80900000000000	322375896437000	172001235165000	132450499340000	104970689906000	8.86867e+13	76217471595000	67120686466000	5.77515e+13	50137270993000	4.37122e+13	37921990687000	31719168448000	2.61961e+13	2.12948e+13	16669668284000	12593289601000	8693564967000	4923555393000
72	337	85300000000000	339909319729000	181356061305000	139654234780000	110679849802000	9.35102e+13	80362797615000	70771255322000	6.08925e+13	52864143581000	4.60896e+13	39984496979000	33444314816000	2.76209e+13	2.2453e+13	17576300428000	13278215117000	9166391739000	5191338381000
72	338	92900000000000	370194323597000	197514397365000	152097050540000	120541125986000	1.01842e+14	87522906195000	77076783346000	6.63178e+13	57574196233000	5.01961e+13	43547007847000	36424113088000	3.00818e+13	2.44535e+13	19142301404000	14461268281000	9983092527000	5653872633000
72	339	98400000000000	392111102712000	209207930040000	161101719840000	127677575856000	1.07871e+14	9.27046e+13	81639994416000	7.02441e+13	60982786968000	5.31679e+13	46125140712000	38580546048000	3.18628e+13	2.59013e+13	20275591584000	15317425176000	10574125992000	5988601368000
72	340	98500000000000	392509589605000	209420539725000	161265441100000	127807329490000	1.07981e+14	9.27988e+13	81722961890000	7.03154e+13	61044761345000	5.32219e+13	46172015855000	38619753920000	3.18952e+13	2.59276e+13	20296196860000	15332991665000	10584872055000	5994687345000
72	341	99500000000000	396494458535000	211546636575000	162902653700000	129104865830000	1.09077e+14	9.37409e+13	82552636630000	71029298850000	61664505115000	5.37623e+13	46640767285000	39011832640000	3.2219e+13	2.61908e+13	20502249620000	15488656555000	10692332685000	6055547115000
72	342	101000000000000	402471761930000	214735781850000	165358472600000	131051170340000	1.10721e+14	9.51541e+13	83797148740000	72100092300000	62594120770000	5.45727e+13	47343894430000	39599950720000	3.27047e+13	2.65856e+13	20811328760000	15722153890000	10853523630000	6146836770000
72	343	93700000000000	373382218741000	199215274845000	153406820620000	121579155058000	1.02719e+14	88276601835000	77740523138000	6.68889e+13	58069991249000	5.06284e+13	43922008991000	36737776064000	3.03409e+13	2.46641e+13	19307143612000	14585800193000	10069061031000	5702560449000
72	344	92900000000000	370194323597000	197514397365000	152097050540000	120541125986000	1.01842e+14	87522906195000	77076783346000	6.63178e+13	57574196233000	5.01961e+13	43547007847000	36424113088000	3.00818e+13	2.44535e+13	19142301404000	14461268281000	9983092527000	5653872633000
72	345	98100000000000	390915642033000	208570100985000	160610556060000	127288314954000	1.07542e+14	9.24219e+13	81391091994000	7.00299e+13	60796863837000	5.30058e+13	45984515283000	38462922432000	3.17656e+13	2.58223e+13	20213775756000	15270725709000	10541887803000	5970343437000
72	346	98300000000000	391712615819000	208995320355000	160937998580000	127547822222000	1.07761e+14	9.26104e+13	81557026942000	7.01727e+13	60920812591000	5.31139e+13	46078265569000	38541338176000	3.18304e+13	2.58749e+13	20254986308000	15301858687000	10563379929000	5982515391000
72	347	98600000000000	392908076498000	209633149410000	161429162360000	127937083124000	1.0809e+14	9.2893e+13	81805929364000	70386822780000	61106735722000	5.3276e+13	46218890998000	38658961792000	3.19275e+13	2.59539e+13	20316802136000	15348558154000	10595618118000	6000773322000
72	348	98900000000000	394103537177000	210270978465000	161920326140000	128326344026000	1.08419e+14	9.31756e+13	82054831786000	70600981470000	61292658853000	5.34381e+13	46359516427000	38776585408000	3.20247e+13	2.60329e+13	20378617964000	15395257621000	10627856307000	6019031253000
72	349	99200000000000	395298997856000	210908807520000	162411489920000	128715604928000	1.08748e+14	9.34583e+13	82303734208000	70815140160000	61478581984000	5.36002e+13	46500141856000	38894209024000	3.21218e+13	2.61118e+13	20440433792000	15441957088000	10660094496000	6037289184000
72	350	0	0	0	0	0	0	0	0	0	0	0	0	0	0	0	0	0	0	0
71	280	0	0	0	0	0	0	0	0	0	0	0	0	0	0	0	0	0	0	0
71	281	0	0	0	0	0	0	0	0	0	0	0	0	0	0	0	0	0	0	0
71	282	0	0	0	0	0	0	0	0	0	0	0	0	0	0	0	0	0	0	0
71	283	0	0	0	0	0	0	0	0	0	0	0	0	0	0	0	0	0	0	0
71	284	0	0	0	0	0	0	0	0	0	0	0	0	0	0	0	0	0	0	0
71	285	0	0	0	0	0	0	0	0	0	0	0	0	0	0	0	0	0	0	0
71	286	0	0	0	0	0	0	0	0	0	0	0	0	0	0	0	0	0	0	0
71	287	0	0	0	0	0	0	0	0	0	0	0	0	0	0	0	0	0	0	0
71	288	0	0	0	0	0	0	0	0	0	0	0	0	0	0	0	0	0	0	0
71	289	0	0	0	0	0	0	0	0	0	0	0	0	0	0	0	0	0	0	0
71	290	0	0	0	0	0	0	0	0	0	0	0	0	0	0	0	0	0	0	0
71	291	125000000000	476015485000	204468355000	138436922500	9.63558e+10	74289540000	58774648750	4.85948e+10	39301943750	32439388750	27177212500	22716032500	1.8253e+10	14591778750	1.15692e+10	8852232500	6565590000	4466493750	2503756250
71	292	0	0	0	0	0	0	0	0	0	0	0	0	0	0	0	0	0	0	0
71	293	0	0	0	0	0	0	0	0	0	0	0	0	0	0	0	0	0	0	0
71	294	51400000000	195737567432	84077387576	56925262532	39621493652	30547858848	24168135566	1.99822e+10	16160959270	13339076654	11175269780	9340832564	7.50564e+09	6000139422	4.75725e+09	3640038004	2699770608	1836622230	1029544570
71	295	0	0	0	0	0	0	0	0	0	0	0	0	0	0	0	0	0	0	0
71	296	229000000000	872060368520	374586026360	253616442020	176523775220	136098437280	107675156510	8.90257e+10	72001160950	59428960190	49788653300	41615771540	3.34395e+10	26732138670	2.11948e+10	16217289940	12028160880	8182616550	4586881450
71	297	12900000000	49124798052	21101134236	14286690402	9943915722	7666680528	6065543751	5.01498e+09	4055960595	3347744919	2804688330	2344294554	1.88371e+09	1505871567	1.19394e+09	913550394	677568888	460942155	258387645
71	298	253000000000	963455341640	413843950520	280196331140	1.95024e+11	150362028960	118959889070	9.83559e+10	79547134150	65657322830	55006678100	45977249780	3.69441e+10	29533760190	2.3416e+10	17916918580	13288754160	9040183350	5067602650
71	299	156000000000	594067325280	255176507040	172769279280	1.20252e+11	92713345920	73350761640	6.06463e+10	49048825800	40484357160	33917161200	28349608560	2.27798e+10	18210539880	1.44383e+10	11047586160	8193856320	5574184200	3124687800
71	300	217000000000	826362881960	354957064280	240326497460	167273621060	128966641440	102032790230	8.43606e+10	68228174350	56314778870	47179640900	39435032420	3.16873e+10	25331327910	2.00841e+10	15367475620	11397864240	7753833150	4346520850
71	301	493000000000	1877405072840	806423192120	545995222340	3.80027e+11	292997945760	231807214670	1.91658e+11	155006866150	127940949230	107186926100	89592032180	7.19899e+10	57549975390	4.56289e+10	34913204980	25894686960	17615851350	9874814650
71	302	353000000000	1.3584e+12	616777530890	4.29828e+11	309289241970	243600672170	1.96562e+11	165005878750	135494344510	1.13243e+11	95828426390	80857699920	65679374150	5.29787e+10	42277563910	3.25421e+10	24253016790	1.6563e+10	9309852560
71	303	657000000000	2.52824e+12	1147940050410	7.99991e+11	575645982930	453387086730	3.65839e+11	307107258750	252180692190	2.10767e+11	178354889910	150491526480	122241781350	9.86034e+10	78686570790	6.05671e+10	45139467510	3.08268e+10	17327402640
71	304	656000000000	2.52439e+12	1146192805280	7.98774e+11	574769809440	452696999840	3.65282e+11	306639820000	251796855520	2.10446e+11	178083421280	150262467840	122055720800	9.84534e+10	78566804320	6.04749e+10	45070762080	3.07799e+10	17301029120
71	305	704000000000	2.7091e+12	1230060571520	8.57221e+11	616826136960	485821170560	3.9201e+11	329076880000	270221015680	2.25845e+11	191113915520	161257282560	130986627200	1.05657e+11	84315594880	6.48999e+10	48368622720	3.30321e+10	18566958080
71	306	910000000000	3.50182e+12	1589993068300	1.10805e+12	797317875900	627979069900	5.06718e+11	425369262500	349291369700	2.9193e+11	247036453300	208443362400	169315100500	1.36574e+11	108987487700	8.38905e+10	62521941300	4.26977e+10	2.39999e+10
71	307	1600000000000	6.15705e+12	2795592208000	1.94823e+12	1401877584000	1104139024000	8.90932e+11	747902000000	614138672000	5.13284e+11	434349808000	366493824000	297696880000	2.4013e+11	191626352000	1.475e+11	109928688000	7.50729e+10	4.21976e+10
71	308	2190000000000	8.42746e+12	3826466834700	2.66664e+12	1918819943100	1511290289100	1.21946e+12	1023690862500	840602307300	7.02557e+11	594516299700	501638421600	407472604500	328678112700	262288569300	2.0189e+11	150464891700	1.02756e+11	5.7758e+10
71	309	3530000000000	13656131983900	6351623815800	4493845143500	3278103047700	2614180330000	2.13345e+12	1806580823100	1494830143900	1257189979100	1069204735800	9.06433e+11	739465882600	598459256000	4.79097e+11	369848654700	276291299700	189041101600	106398047700
71	310	7570000000000	29285246209100	13620904330200	9636942701500	7029813051300	5606046770000	4575122686400	3874169073900	3205627249100	2696013637900	2292883810200	1.94382e+12	1585766779400	1283381464000	1.02741e+12	793131534300	592500039300	405394090400	228168051300
71	311	16600000000000	6.42186e+13	29868825876000	21132529570000	15415442094000	12293312600000	10032633632000	8495535882000	7029512858000	5911998202000	5027988276000	4.26255e+12	3477374972000	2814284320000	2252978062000	1739231634000	1299273534000	888975152000	500342094000
71	312	20600000000000	79693008178000	37066133316000	26224705370000	19130006454000	15255556600000	1.24501e+13	10542652962000	8723371378000	7336576082000	6239551716000	5289665322000	4315296652000	3492425120000	2.79586e+12	2158323594000	1612351494000	1103186032000	620906454000
71	313	22800000000000	88203911964000	41024652408000	29025402060000	21173016852000	16884790800000	1.37798e+13	11668567356000	9654993564000	8120093916000	6905911608000	5854581036000	4776153576000	3865402560000	3.09445e+12	2388824172000	1784544372000	1221002016000	687216852000
71	314	25000000000000	96714815750000	44983171500000	31826098750000	23216027250000	18514025000000	1.51094e+13	12794481750000	10586615750000	8903611750000	7572271500000	6.4195e+12	5237010500000	4238380000000	3.39304e+12	2619324750000	1956737250000	1338818000000	753527250000
71	315	27300000000000	1.06483e+14	51699690042000	3.74601e+13	27988555959000	22678279260000	18777197439000	16076604726000	1.34502e+13	11414349492000	9.78394e+12	8355886812000	6870234189000	5.59638e+12	4500557880000	3488728152000	2614950702000	1793950158000	1011576111000
71	316	31700000000000	1.23645e+14	60032240818000	4.34976e+13	32499532011000	26333386540000	21803558931000	18667705854000	1.5618e+13	13254024868000	1.13608e+13	9702623148000	7977524681000	6.49836e+12	5225922520000	4051014008000	3.03641e+12	2083084982000	1174614019000
71	317	35000000000000	1.36517e+14	66281653900000	4.80258e+13	35882764050000	2.90747e+13	2.40733e+13	20611031700000	1.72439e+13	14633781400000	1.25435e+13	10712675400000	8807992550000	7.17484e+12	5769946000000	4472728400000	3.3525e+12	2299936100000	1296892450000
71	318	38500000000000	1.50168e+14	72909819290000	5.28283e+13	39471040455000	3.19822e+13	2.64807e+13	22672134870000	18968244295000	16097159540000	1.37979e+13	11783942940000	9688791805000	7.89233e+12	6346940600000	4920001240000	3.68775e+12	2529929710000	1426581695000
71	319	42900000000000	1.6733e+14	81242370066000	5.88659e+13	43982016507000	35637295980000	2.9507e+13	25263235998000	21136043643000	17936834916000	1.53748e+13	13130679276000	10796082297000	8.79431e+12	7072305240000	5482287096000	4.10921e+12	2819064534000	1589619603000
71	320	46800000000000	1.82542e+14	88628040072000	6.42173e+13	47980381644000	38877050160000	3.21895e+13	27559893816000	23057502156000	19567456272000	1.67725e+13	14324377392000	11777544324000	9593790804000	7715242080000	5980676832000	4482772632000	3075343128000	1734130476000
71	321	46900000000000	1.82932e+14	88817416226000	6.43545e+13	48082903827000	38960120780000	3.22583e+13	27618782478000	23106770323000	19609267076000	1.68083e+13	14354985036000	11802710017000	9614290357000	7731727640000	5993456056000	4492351206000	3081914374000	1737835883000
71	322	48100000000000	1.87613e+14	91089930074000	6.60011e+13	49313170023000	39956968220000	3.30836e+13	28325446422000	23697988327000	20110996724000	1.72384e+13	14722276764000	12104698333000	9860284993000	7929554360000	6146806744000	4607294094000	3160769326000	1782300767000
71	323	55200000000000	2.15306e+14	104535637008000	7.57435e+13	56592245016000	45854982240000	37967080536000	32506541424000	2.7196e+13	23079563808000	1.97829e+13	16895419488000	13891462536000	1.13158e+13	9100029120000	7054131648000	5287372848000	3627327792000	2045384664000
71	324	62500000000000	2.4378e+14	118360096250000	8.57603e+13	64076364375000	51919137500000	42988089375000	36805413750000	3.07926e+13	26131752500000	2.23991e+13	19129777500000	15728558125000	1.28122e+13	10303475000000	7987015000000	5.98661e+12	4107028750000	2315879375000
71	325	73700000000000	2.87465e+14	139570225498000	1.01129e+14	75558848871000	6.1223e+13	5.06916e+13	43400943894000	36310639079000	30814562548000	2.64131e+13	22557833628000	18547115741000	1.51082e+13	12149857720000	9418288088000	7.05941e+12	4843008302000	2730884959000
71	326	80800000000000	3.15158e+14	153015932432000	1.10871e+14	82837923864000	6.71211e+13	5.5575e+13	47582038896000	39808678936000	33783129632000	2.89576e+13	24730976352000	20333879944000	1.65636e+13	13320332480000	10325612992000	7.73949e+12	5309566768000	2993968856000
71	327	80200000000000	3.12818e+14	151879675508000	1.10048e+14	82222790766000	6.66226e+13	5.51623e+13	47228706924000	39513069934000	33532264808000	2.87426e+13	24547330488000	20182885786000	1.64406e+13	13221419120000	10248937648000	7.68202e+12	5270139292000	2971736414000
71	328	87300000000000	3.40512e+14	165325382442000	1.1979e+14	89501865759000	72520651260000	6.00458e+13	51409801926000	43011109791000	36500831892000	3.12871e+13	26720473212000	21969649989000	17896109769000	14391893880000	11156262552000	8.3621e+12	5736697758000	3234820311000
71	329	95000000000000	3.70545e+14	179907346300000	1.30356e+14	97396073850000	78917089000000	6.53419e+13	55944228900000	46804758650000	39720263800000	3.40467e+13	29077261800000	23907408350000	19474575350000	15661282000000	12140262800000	9099645300000	6242683700000	3520136650000
71	330	91600000000000	3.57284e+14	173468557064000	1.2569e+14	93910319628000	76092687920000	6.30033e+13	53942014392000	45129640972000	38298696464000	3.28282e+13	28036601904000	23051774788000	18777590548000	15100772960000	11705769184000	8.77397e+12	6019261336000	3394152812000
71	331	91800000000000	3.58064e+14	173847309372000	1.25965e+14	94115363994000	76258829160000	6.31409e+13	54059791716000	45228177306000	38382318072000	3.28998e+13	28097817192000	23102106174000	18818589654000	15133744080000	11731327632000	8.79313e+12	6032403828000	3401563626000
71	332	93400000000000	3.64304e+14	176877327836000	1.2816e+14	95755718922000	77587959080000	6.42414e+13	55002010308000	46016467978000	39051290936000	3.34733e+13	28587539496000	23504757262000	19146582502000	15397513040000	11935795216000	8946388116000	6137543764000	3460850138000
71	333	93700000000000	3.65475e+14	177445456298000	1.28572e+14	96063285471000	77837170940000	6.44477e+13	55178676294000	46164272479000	39176723348000	3.35808e+13	28679362428000	23580254341000	19208081161000	15446969720000	11974132888000	8975123838000	6157257502000	3471966359000
71	334	97000000000000	3.78346e+14	183694869380000	1.331e+14	99446517510000	80578501400000	6.67175e+13	57122002140000	47790121990000	40556479880000	3.47635e+13	29689414680000	24410722210000	19884566410000	15990993200000	12395847280000	9291216780000	6374108620000	3594244790000
71	335	94100000000000	374976166313000	200065713585000	154061705660000	122098169594000	1.03157e+14	8.86534e+13	78072393034000	6.71744e+13	58317888757000	5.08445e+13	44109509563000	36894607552000	3.04704e+13	2.47694e+13	19389564716000	14648066149000	10112045283000	5726904357000
71	336	89300000000000	355848795449000	189860448705000	146203085180000	115869995162000	9.78952e+13	84131275815000	74089954282000	6.37479e+13	55343118661000	4.82509e+13	41859502699000	35012629696000	2.89161e+13	2.35059e+13	18400511468000	13900874677000	9596234259000	5434777461000
71	337	94200000000000	375374653206000	200278323270000	154225426920000	122227923228000	1.03267e+14	8.87477e+13	78155360508000	6.72458e+13	58379863134000	5.08985e+13	44156384706000	36933815424000	3.05028e+13	2.47957e+13	19410169992000	14663632638000	10122791346000	5732990334000
71	338	103000000000000	410441499790000	218987975550000	168632897800000	133646243020000	1.12914e+14	9.70383e+13	85456498220000	73527816900000	63833608310000	5.56534e+13	48281397290000	40384108160000	3.33523e+13	2.71121e+13	21223434280000	16033483670000	11068444890000	6268556310000
71	339	109000000000000	434350713370000	2.31745e+14	178456173400000	141431461060000	1.19491e+14	1.02691e+14	90434546660000	77810990700000	67552070930000	5.88953e+13	51093905870000	42736580480000	35295143940000	2.86914e+13	22459750840000	16967473010000	11713208670000	6633714930000
71	340	109000000000000	434350713370000	2.31745e+14	178456173400000	141431461060000	1.19491e+14	1.02691e+14	90434546660000	77810990700000	67552070930000	5.88953e+13	51093905870000	42736580480000	35295143940000	2.86914e+13	22459750840000	16967473010000	11713208670000	6633714930000
71	341	110000000000000	438335582300000	2.33871e+14	180093386000000	142728997400000	1.20588e+14	1.03633e+14	91264221400000	78524853000000	68171814700000	5.94357e+13	51562657300000	43128659200000	35618952600000	2.89547e+13	22665803600000	17123137900000	11820669300000	6694574700000
71	342	111000000000000	442320451230000	2.35997e+14	181730598600000	144026533740000	1.21684e+14	1.04575e+14	92093896140000	79238715300000	68791558470000	5.9976e+13	52031408730000	43520737920000	35942761260000	2.92179e+13	22871856360000	17278802790000	11928129930000	6755434470000
71	343	103000000000000	410441499790000	218987975550000	168632897800000	133646243020000	1.12914e+14	9.70383e+13	85456498220000	73527816900000	63833608310000	5.56534e+13	48281397290000	40384108160000	3.33523e+13	2.71121e+13	21223434280000	16033483670000	11068444890000	6268556310000
71	344	102000000000000	406456630860000	216861878700000	166995685200000	132348706680000	1.11818e+14	9.60962e+13	84626823480000	72813954600000	63213864540000	5.51131e+13	47812645860000	39992029440000	3.30285e+13	2.68489e+13	21017381520000	15877818780000	10960984260000	6207696540000
71	345	108000000000000	430365844440000	2.29618e+14	176818960800000	140133924720000	1.18395e+14	1.01749e+14	89604871920000	77097128400000	66932327160000	5.8355e+13	50625154440000	42344501760000	3.49713e+13	2.84282e+13	22253698080000	16811808120000	11605748040000	6572855160000
71	346	108000000000000	430365844440000	2.29618e+14	176818960800000	140133924720000	1.18395e+14	1.01749e+14	89604871920000	77097128400000	66932327160000	5.8355e+13	50625154440000	42344501760000	3.49713e+13	2.84282e+13	22253698080000	16811808120000	11605748040000	6572855160000
71	347	109000000000000	434350713370000	2.31745e+14	178456173400000	141431461060000	1.19491e+14	1.02691e+14	90434546660000	77810990700000	67552070930000	5.88953e+13	51093905870000	42736580480000	35295143940000	2.86914e+13	22459750840000	16967473010000	11713208670000	6633714930000
71	348	109000000000000	434350713370000	2.31745e+14	178456173400000	141431461060000	1.19491e+14	1.02691e+14	90434546660000	77810990700000	67552070930000	5.88953e+13	51093905870000	42736580480000	35295143940000	2.86914e+13	22459750840000	16967473010000	11713208670000	6633714930000
71	349	109000000000000	434350713370000	2.31745e+14	178456173400000	141431461060000	1.19491e+14	1.02691e+14	90434546660000	77810990700000	67552070930000	5.88953e+13	51093905870000	42736580480000	35295143940000	2.86914e+13	22459750840000	16967473010000	11713208670000	6633714930000
71	350	0	0	0	0	0	0	0	0	0	0	0	0	0	0	0	0	0	0	0
70	280	0	0	0	0	0	0	0	0	0	0	0	0	0	0	0	0	0	0	0
70	281	0	0	0	0	0	0	0	0	0	0	0	0	0	0	0	0	0	0	0
70	282	0	0	0	0	0	0	0	0	0	0	0	0	0	0	0	0	0	0	0
70	283	0	0	0	0	0	0	0	0	0	0	0	0	0	0	0	0	0	0	0
70	284	0	0	0	0	0	0	0	0	0	0	0	0	0	0	0	0	0	0	0
70	285	0	0	0	0	0	0	0	0	0	0	0	0	0	0	0	0	0	0	0
70	286	0	0	0	0	0	0	0	0	0	0	0	0	0	0	0	0	0	0	0
70	287	0	0	0	0	0	0	0	0	0	0	0	0	0	0	0	0	0	0	0
70	288	0	0	0	0	0	0	0	0	0	0	0	0	0	0	0	0	0	0	0
70	289	0	0	0	0	0	0	0	0	0	0	0	0	0	0	0	0	0	0	0
70	290	0	0	0	0	0	0	0	0	0	0	0	0	0	0	0	0	0	0	0
70	291	132000000000	502672352160	215918582880	146189390160	1.01752e+11	78449754240	62066029080	5.13161e+10	41502852600	34255994520	28699136400	23988130320	1.92752e+10	15408918360	1.22171e+10	9347957520	6933263040	4716617400	2643966600
70	292	0	0	0	0	0	0	0	0	0	0	0	0	0	0	0	0	0	0	0
70	293	0	0	0	0	0	0	0	0	0	0	0	0	0	0	0	0	0	0	0
70	294	133000000000	506480476040	217554329720	147296885540	1.02523e+11	79044070560	62536226270	5.17049e+10	41817268150	34515509630	28916554100	24169858580	1.94212e+10	15525652590	1.23096e+10	9418775380	6985787760	4752349350	2663996650
70	295	0	0	0	0	0	0	0	0	0	0	0	0	0	0	0	0	0	0	0
70	296	230000000000	875868492400	376221773200	254723937400	177294621400	136692753600	108145353700	8.94144e+10	72315576500	59688475300	50006071000	41797499800	3.35856e+10	26848872900	2.12873e+10	16288107800	12080685600	8218348500	4606911500
70	297	43300000000	164891764004	70827838172	47954549954	3.33776e+10	25733896656	20359538327	1.68332e+10	13614193315	11237004263	9414186410	7868833658	6.32285e+09	5054592159	4.00757e+09	3066413338	2274320376	1547193435	867301165
70	298	236000000000	898717235680	386036254240	261368909680	181919698480	140258651520	110966536840	9.1747e+10	74202069800	61245565960	51310577200	42887869360	3.44617e+10	27549278280	2.18426e+10	16713014960	12395833920	8432740200	4727091800
70	299	148000000000	563602334240	242090532320	163909316240	1.14085e+11	87958815360	69589184120	5.75362e+10	46533501400	38408236280	32177819600	26895782480	2.16116e+10	17276666040	1.36979e+10	10481043280	7773658560	5288328600	2964447400
70	300	216000000000	822554758080	353321317440	239219002080	166502774880	128372325120	101562593040	8.39718e+10	67913758800	56055263760	46962223200	39253304160	3.15412e+10	25214593680	1.99916e+10	15296657760	11345339520	7718101200	4326490800
70	301	594000000000	2262025584720	971633622960	657852255720	4.57883e+11	353023894080	279297130860	2.30923e+11	186762836700	154151975340	129146113800	107946586440	8.67384e+10	69340132620	5.49768e+10	42065808840	31199683680	21224778300	11897849700
70	302	244000000000	9.3895e+11	426327811720	2.97105e+11	213786331560	168381201160	1.35867e+11	114055055000	93656147480	7.82758e+10	66238345720	55890308160	45398774200	36619844520	29223018680	2.24937e+10	16764124920	1.14486e+10	6.43514e+09
70	303	734000000000	2.82455e+12	1282477925420	8.9375e+11	643111341660	506523777260	4.08715e+11	343100042500	281736115780	2.35469e+11	199257974420	168129041760	136568443700	1.1016e+11	87908588980	6.76655e+10	50429785620	3.44397e+10	19358163680
70	304	747000000000	2.87457e+12	1305192112110	9.09579e+11	654501597030	515494906830	4.15954e+11	349176746250	286725992490	2.39639e+11	202787066610	171106804080	138987230850	1.12111e+11	89465553090	6.88639e+10	51322956210	3.50497e+10	19701019440
70	305	839000000000	3.2286e+12	1465938664070	1.0216e+12	735109558110	578982900710	4.67183e+11	392181111250	322038966130	2.69153e+11	227762180570	192180198960	156104801450	1.25918e+11	100484068330	7.73452e+10	57643855770	3.93664e+10	2.21274e+10
70	306	1150000000000	4.42538e+12	2009331899500	1.40029e+12	1007599513500	793599923500	6.40358e+11	537554562500	441412170500	3.68923e+11	312188924500	263417436000	213969632500	172593529500	137731440500	1.06015e+11	79011244500	5.39587e+10	3.03295e+10
70	307	2030000000000	7.81176e+12	3546907613900	2.47181e+12	1778632184700	1400876386700	1.13037e+12	948900662500	779188440100	6.51229e+11	551081318900	464989039200	377702916500	304665099900	243125934100	1.8714e+11	139472022900	9.52488e+10	5.35382e+10
70	308	2740000000000	1.05439e+13	4787451656200	3.33634e+12	2400715362600	1890838078600	1.52572e+12	1280782175000	1051712475800	8.78999e+11	743824046200	627620673600	509805907000	4.11223e+11	328160127800	2.52593e+11	188252878200	1.28562e+11	72263444800
70	309	3930000000000	15203569035900	7071354559800	5003062723500	3649559483700	2910404730000	2375195793600	2011292531100	1664215995900	1399647767100	1190361079800	1.00914e+12	823258050600	666273336000	5.33386e+11	411757850700	307599095700	210462189600	118454483700
70	310	11600000000000	44875674508000	20872191576000	14767309820000	10772236644000	8590507600000	7.01076e+12	5936639532000	4912189708000	4131275852000	3513533976000	2.97865e+12	2429972872000	1966608320000	1.57437e+12	1215366684000	907926084000	621211552000	349636644000
70	311	19600000000000	75824415548000	35266806456000	24951661420000	18201365364000	14514995600000	1.18458e+13	10030873692000	8299906748000	6980431612000	5936660856000	5032885452000	4105816232000	3322889920000	2.66014e+12	2053550604000	1534082004000	1049633312000	590765364000
70	312	21600000000000	83561600808000	38865460176000	27497749320000	20058647544000	15996117600000	1.30545e+13	11054432232000	9146836008000	7692720552000	6542442576000	5546445192000	4524777072000	3661960320000	2.93159e+12	2263096584000	1690620984000	1156738752000	651047544000
70	313	24300000000000	94006800909000	43723642698000	30934967985000	22565978487000	17995632300000	1.46863e+13	12436236261000	10290190509000	8654310621000	7360247898000	6.23975e+12	5090374206000	4119705360000	3.29803e+12	2545983657000	1901948607000	1301331096000	732428487000
70	314	26700000000000	103291423221000	48042027162000	3.39903e+13	24794717103000	19772978700000	1.61368e+13	13664506509000	11306505621000	9509057349000	8087185962000	6.85602e+12	5593127214000	4526589840000	3.62377e+12	2797438833000	2089795383000	1429857624000	804767103000
70	315	29300000000000	1.14284e+14	55487213122000	4.02044e+13	30038999619000	24339691660000	20152816299000	17254377966000	1.44356e+13	12250565572000	1.05007e+13	8968039692000	7373548049000	6.00637e+12	4830269080000	3744312632000	2806522182000	1925375078000	1085684251000
70	316	34200000000000	1.33396e+14	64766644668000	4.6928e+13	35062586586000	2.84102e+13	23523082506000	20139922404000	1.68497e+13	14299294968000	1.22568e+13	10467814248000	8606667006000	7.01085e+12	5638061520000	4370494608000	3.27587e+12	2247366132000	1267249194000
70	317	37900000000000	1.47828e+14	71773562366000	5.2005e+13	38855907357000	3.14838e+13	2.6068e+13	22318802898000	18672635293000	15846294716000	1.35828e+13	11600297076000	9537797647000	7.76933e+12	6248027240000	4843325896000	3.63028e+12	2490502234000	1404349253000
70	318	41600000000000	1.6226e+14	78780480064000	5.70821e+13	42649228128000	3.45574e+13	2.86129e+13	24497683392000	20495557472000	17393294464000	1.49089e+13	12732779904000	10468928288000	8.52781e+12	6857992960000	5316157184000	3.98469e+12	2733638336000	1541449312000
70	319	46500000000000	1.81372e+14	88059911610000	6.38057e+13	47672815095000	38627838300000	3.19831e+13	27383227830000	22909697655000	19442023860000	1.6665e+13	14232554460000	11702047245000	9532292145000	7665785400000	5942339160000	4454036910000	3055629390000	1723014255000
70	320	50700000000000	1.97754e+14	96013710078000	6.95688e+13	51978746781000	42116804340000	3.48719e+13	29856551634000	2.4979e+13	21198077628000	1.81702e+13	15518075508000	12759006351000	10393273371000	8358178920000	6479066568000	4856337018000	3331621722000	1878641349000
70	321	50700000000000	1.97754e+14	96013710078000	6.95688e+13	51978746781000	42116804340000	3.48719e+13	29856551634000	2.4979e+13	21198077628000	1.81702e+13	15518075508000	12759006351000	10393273371000	8358178920000	6479066568000	4856337018000	3331621722000	1878641349000
70	322	52000000000000	2.02825e+14	98475600080000	7.13526e+13	53311535160000	43196722400000	35766090360000	30622104240000	2.56194e+13	21741618080000	1.86361e+13	15915974880000	13086160360000	10659767560000	8572491200000	6645196480000	4980858480000	3417047920000	1926811640000
70	323	59600000000000	2.32468e+14	112868187784000	8.1781e+13	61103221068000	49510089520000	40993442028000	35097642552000	2.93638e+13	24919239184000	2.13598e+13	18242155824000	14998753028000	1.22177e+13	9825393760000	7616417504000	5708830104000	3916462616000	2208422572000
70	324	67700000000000	2.64062e+14	128207656258000	9.28956e+13	69407517891000	5.62388e+13	46564698411000	39867624174000	3.33545e+13	28305914308000	2.42627e+13	20721374988000	17037174161000	1.38782e+13	11160724120000	8651534648000	6.48469e+12	4448733542000	2508560539000
70	325	79900000000000	3.11648e+14	151311547046000	1.09636e+14	81915224217000	6.63734e+13	5.4956e+13	47052040938000	39365265433000	33406832396000	2.86351e+13	24455507556000	20107388707000	1.63791e+13	13171962440000	10210599976000	7.65328e+12	5250425554000	2960620193000
70	326	87500000000000	3.41292e+14	165704134750000	1.20064e+14	89706910125000	72686792500000	6.01833e+13	51527579250000	43109646125000	36584453500000	3.13588e+13	26781688500000	22019981375000	17937108875000	14424865000000	11181821000000	8.38125e+12	5749840250000	3242231125000
70	327	86800000000000	3.38561e+14	164378501672000	1.19104e+14	88989254844000	72105298160000	5.97019e+13	51115358616000	42764768956000	36291777872000	3.11079e+13	26567434992000	21843821524000	17793612004000	14309466080000	11092366432000	8.3142e+12	5703841528000	3216293276000
70	328	94500000000000	3.68595e+14	178960465530000	1.2967e+14	96883462935000	78501735900000	6.4998e+13	55649785590000	46558417815000	39511209780000	3.38675e+13	28924223580000	23781579885000	19372077585000	15578854200000	12076366680000	9051752430000	6209827470000	3501609615000
70	329	103000000000000	4.01749e+14	195057438620000	1.41333e+14	105597848490000	85562738600000	70844371290000	60655321860000	5.07462e+13	43065128120000	3.69138e+13	31525873320000	25920663790000	21114539590000	16980126800000	13162600720000	9865931220000	6768383380000	3816569210000
70	330	99100000000000	3.86537e+14	187671768614000	1.35982e+14	101599483353000	82322984420000	6.81619e+13	58358664042000	4.88248e+13	41434506764000	3.55161e+13	30332175204000	24939201763000	20315057023000	16337189960000	12664210984000	9492366834000	6512104786000	3672058337000
70	331	99300000000000	3.87317e+14	188050520922000	1.36256e+14	101804527719000	82489125660000	6.82995e+13	58476441366000	4.89233e+13	41518128372000	3.55877e+13	30393390492000	24989533149000	20356056129000	16370161080000	12689769432000	9511523982000	6525247278000	3679469151000
70	332	101000000000000	3.93948e+14	191269915540000	1.38589e+14	103547404830000	83901326200000	6.94688e+13	59477548620000	4.97608e+13	42228912040000	3.6197e+13	30913720440000	25417349930000	20704548530000	16650415600000	12907016240000	9674359740000	6636958460000	3742461070000
70	333	101000000000000	3.93948e+14	191269915540000	1.38589e+14	103547404830000	83901326200000	6.94688e+13	59477548620000	4.97608e+13	42228912040000	3.6197e+13	30913720440000	25417349930000	20704548530000	16650415600000	12907016240000	9674359740000	6636958460000	3742461070000
70	334	105000000000000	4.0955e+14	198844961700000	1.44077e+14	107648292150000	87224151000000	72219990150000	61833095100000	5.17316e+13	43901344200000	3.76305e+13	32138026200000	26423977650000	2.15245e+13	17309838000000	13418185200000	10057502700000	6899808300000	3890677350000
70	335	101000000000000	402471761930000	214735781850000	165358472600000	131051170340000	1.10721e+14	9.51541e+13	83797148740000	72100092300000	62594120770000	5.45727e+13	47343894430000	39599950720000	3.27047e+13	2.65856e+13	20811328760000	15722153890000	10853523630000	6146836770000
70	336	96300000000000	383742877959000	204743126655000	157663573380000	124952749542000	1.05569e+14	9.07261e+13	79897677462000	6.87449e+13	59681325051000	5.20332e+13	45140762709000	37757180736000	3.11828e+13	2.53485e+13	19842880788000	14990528907000	10348458669000	5860795851000
70	337	102000000000000	406456630860000	216861878700000	166995685200000	132348706680000	1.11818e+14	9.60962e+13	84626823480000	72813954600000	63213864540000	5.51131e+13	47812645860000	39992029440000	3.30285e+13	2.68489e+13	21017381520000	15877818780000	10960984260000	6207696540000
70	338	111000000000000	442320451230000	2.35997e+14	181730598600000	144026533740000	1.21684e+14	1.04575e+14	92093896140000	79238715300000	68791558470000	5.9976e+13	52031408730000	43520737920000	35942761260000	2.92179e+13	22871856360000	17278802790000	11928129930000	6755434470000
70	339	117000000000000	466229664810000	2.48753e+14	191553874200000	151811751780000	1.28261e+14	1.10228e+14	97071944580000	83521889100000	72510021090000	6.32179e+13	54843917310000	45873210240000	37885613220000	3.07972e+13	24108172920000	18212792130000	12572893710000	7120593090000
70	340	117000000000000	466229664810000	2.48753e+14	191553874200000	151811751780000	1.28261e+14	1.10228e+14	97071944580000	83521889100000	72510021090000	6.32179e+13	54843917310000	45873210240000	37885613220000	3.07972e+13	24108172920000	18212792130000	12572893710000	7120593090000
70	341	118000000000000	470214533740000	2.50879e+14	193191086800000	153109288120000	1.29358e+14	1.1117e+14	97901619320000	84235751400000	73129764860000	6.37582e+13	55312668740000	46265288960000	38209421880000	3.10605e+13	24314225680000	18368457020000	12680354340000	7181452860000
70	342	120000000000000	478184271600000	2.55132e+14	196465512000000	155704360800000	1.3155e+14	1.13054e+14	99560968800000	85663476000000	74369252400000	6.48389e+13	56250171600000	47049446400000	38857039200000	3.15869e+13	24726331200000	18679786800000	12895275600000	7303172400000
70	343	111000000000000	442320451230000	2.35997e+14	181730598600000	144026533740000	1.21684e+14	1.04575e+14	92093896140000	79238715300000	68791558470000	5.9976e+13	52031408730000	43520737920000	35942761260000	2.92179e+13	22871856360000	17278802790000	11928129930000	6755434470000
70	344	110000000000000	438335582300000	2.33871e+14	180093386000000	142728997400000	1.20588e+14	1.03633e+14	91264221400000	78524853000000	68171814700000	5.94357e+13	51562657300000	43128659200000	35618952600000	2.89547e+13	22665803600000	17123137900000	11820669300000	6694574700000
70	345	116000000000000	462244795880000	2.46627e+14	189916661600000	150514215440000	1.27165e+14	1.09286e+14	96242269840000	82808026800000	71890277320000	6.26776e+13	54375165880000	45481131520000	37561804560000	3.0534e+13	23902120160000	18057127240000	12465433080000	7059733320000
70	346	117000000000000	466229664810000	2.48753e+14	191553874200000	151811751780000	1.28261e+14	1.10228e+14	97071944580000	83521889100000	72510021090000	6.32179e+13	54843917310000	45873210240000	37885613220000	3.07972e+13	24108172920000	18212792130000	12572893710000	7120593090000
70	347	117000000000000	466229664810000	2.48753e+14	191553874200000	151811751780000	1.28261e+14	1.10228e+14	97071944580000	83521889100000	72510021090000	6.32179e+13	54843917310000	45873210240000	37885613220000	3.07972e+13	24108172920000	18212792130000	12572893710000	7120593090000
70	348	117000000000000	466229664810000	2.48753e+14	191553874200000	151811751780000	1.28261e+14	1.10228e+14	97071944580000	83521889100000	72510021090000	6.32179e+13	54843917310000	45873210240000	37885613220000	3.07972e+13	24108172920000	18212792130000	12572893710000	7120593090000
70	349	118000000000000	470214533740000	2.50879e+14	193191086800000	153109288120000	1.29358e+14	1.1117e+14	97901619320000	84235751400000	73129764860000	6.37582e+13	55312668740000	46265288960000	38209421880000	3.10605e+13	24314225680000	18368457020000	12680354340000	7181452860000
70	350	0	0	0	0	0	0	0	0	0	0	0	0	0	0	0	0	0	0	0
69	280	0	0	0	0	0	0	0	0	0	0	0	0	0	0	0	0	0	0	0
69	281	0	0	0	0	0	0	0	0	0	0	0	0	0	0	0	0	0	0	0
69	282	0	0	0	0	0	0	0	0	0	0	0	0	0	0	0	0	0	0	0
69	283	0	0	0	0	0	0	0	0	0	0	0	0	0	0	0	0	0	0	0
69	284	0	0	0	0	0	0	0	0	0	0	0	0	0	0	0	0	0	0	0
69	285	0	0	0	0	0	0	0	0	0	0	0	0	0	0	0	0	0	0	0
69	286	0	0	0	0	0	0	0	0	0	0	0	0	0	0	0	0	0	0	0
69	287	0	0	0	0	0	0	0	0	0	0	0	0	0	0	0	0	0	0	0
69	288	0	0	0	0	0	0	0	0	0	0	0	0	0	0	0	0	0	0	0
69	289	0	0	0	0	0	0	0	0	0	0	0	0	0	0	0	0	0	0	0
69	290	0	0	0	0	0	0	0	0	0	0	0	0	0	0	0	0	0	0	0
69	291	176000000000	670229802880	287891443840	194919186880	1.35669e+11	104599672320	82754705440	6.84215e+10	55337136800	45674659360	38265515200	31984173760	2.57003e+10	20545224480	1.62894e+10	12463943360	9244350720	6288823200	3525288800
69	292	0	0	0	0	0	0	0	0	0	0	0	0	0	0	0	0	0	0	0
69	293	0	0	0	0	0	0	0	0	0	0	0	0	0	0	0	0	0	0	0
69	294	102000000000	388428635760	166846177680	112964528760	78626310360	60620264640	47960113380	3.96534e+10	32070386100	26470541220	22176605400	18536282520	1.48945e+10	11906891460	9.44046e+09	7223421720	5357521440	3644658900	2043065100
69	295	0	0	0	0	0	0	0	0	0	0	0	0	0	0	0	0	0	0	0
69	296	185000000000	704502917800	302613165400	204886645300	142606543300	109948519200	86986480150	71920311400	58166876750	48010295350	40222274500	33619728100	2.70145e+10	21595832550	1.71224e+10	13101304100	9717073200	6610410750	3705559250
69	297	33000000000	125668088040	53979645720	36547347540	2.54379e+10	19612438560	15516507270	1.2829e+10	10375713150	8563998630	7174784100	5997032580	4.8188e+09	3852229590	3.05427e+09	2336989380	1733315760	1179154350	660991650
69	298	239000000000	910141607320	390943494760	264691395820	184232237020	142041600480	112377128410	9.29133e+10	75145316450	62024111290	51962830300	43433054140	3.48998e+10	27899480970	2.21203e+10	16925468540	12553408080	8539936050	4787181950
69	299	212000000000	807322262560	346778330080	234789020560	163419390160	125995059840	99681804280	8.24168e+10	66656096600	55017203320	46092552400	38526391120	3.09571e+10	24747656760	1.96213e+10	15013386320	11135240640	7575173400	4246370600
69	300	240000000000	913949731200	392579241600	265798891200	185003083200	142635916800	112847325600	9.3302e+10	75459732000	62283626400	52180248000	43614782400	3.50458e+10	28016215200	2.22128e+10	16996286400	12605932800	8575668000	4807212000
69	301	569000000000	2166822487720	930739951960	630164871220	4.38611e+11	338165986080	267542201110	2.21204e+11	178902447950	147664097590	123710671300	103403379940	8.30878e+10	66421776870	5.26629e+10	40295362340	29886565680	20331479550	11397098450
69	302	402000000000	1.54696e+12	702392542260	4.89492e+11	352221742980	277414929780	2.23847e+11	187910377500	154302341340	1.28963e+11	109130389260	92081573280	74796341100	6.03327e+10	48146120940	3.70593e+10	27619582860	1.88621e+10	1.06022e+10
69	303	762000000000	2.93229e+12	1331400789060	9.27844e+11	667644199380	525846210180	4.24307e+11	356188327500	292483542540	2.44451e+11	206859096060	174542683680	141778139100	1.14362e+11	91262050140	7.02467e+10	52353537660	3.57535e+10	20096622240
69	304	934000000000	3.59418e+12	1631926951420	1.13728e+12	818346039660	644541155260	5.20082e+11	436587792500	358503449780	2.9963e+11	253551700420	213940769760	173780553700	140175962220	111861882980	8.6103e+10	64170871620	4.38238e+10	2.46329e+10
69	305	1050000000000	4.04056e+12	1834607386500	1.27852e+12	919982164500	724591234500	5.84674e+11	490810687500	403028503500	3.36843e+11	285042061500	240511572000	195363577500	157585396500	125754793500	9.67967e+10	72140701500	4.92666e+10	2.76922e+10
69	306	1390000000000	5.34894e+12	2428670730700	1.69252e+12	1217881151100	959220777100	7.73998e+11	649739862500	533532971300	4.45915e+11	377341395700	318391509600	258624164500	2.08613e+11	166475393300	1.2814e+11	95500547700	6.52196e+10	36659192800
69	307	2430000000000	9.35102e+12	4245805665900	2.95887e+12	2129101580700	1676911142700	1.3531e+12	1135876162500	932723108100	7.7955e+11	659668770900	556612495200	452127136500	3.64698e+11	291032522100	2.24015e+11	166954194900	1.14017e+11	6.40877e+10
69	308	3150000000000	1.21217e+13	5503822159500	3.83557e+12	2759946493500	2173773703500	1.75402e+12	1472432062500	1209085510500	1.01053e+12	855126184500	721534716000	586090732500	4.72756e+11	377264380500	2.9039e+11	216422104500	1.478e+11	8.30766e+10
69	309	5360000000000	20735656496800	9644391969600	6823515572000	4977516242400	3969406960000	3.23945e+12	2743136887200	2269770416800	1908934359200	1623495009600	1376340103200	1122815051200	908708672000	7.27468e+11	561583226400	419524466400	287042579200	161556242400
69	310	13900000000000	53773437557000	25010643354000	17695310905000	12908111151000	10293797900000	8.40082e+12	7113731853000	5886158357000	4950408133000	4210182954000	3.56924e+12	2911777838000	2356539280000	1.88653e+12	1456344561000	1087945911000	744382808000	418961151000
69	311	20700000000000	80079867441000	37246066002000	26352009765000	19222870563000	15329612700000	1.25106e+13	10593830889000	8765717841000	7372190529000	6269840802000	5315343309000	4336244694000	3509378640000	2.80944e+12	2168800893000	1620178443000	1108541304000	623920563000
69	312	22900000000000	88590771227000	41204585094000	29152706455000	21265880961000	16958846900000	1.38402e+13	11719745283000	9697340027000	8155708363000	6936200694000	5880259023000	4797101618000	3882356080000	3.10802e+12	2399301471000	1792371321000	1226357288000	690230961000
69	313	25800000000000	99809689854000	46422632988000	3.28445e+13	23958940122000	19106473800000	1.55929e+13	13203905166000	10925387454000	9188527326000	7814584188000	6.62492e+12	5404594836000	4374008160000	3.50162e+12	2703143142000	2019352842000	1381660176000	777640122000
69	314	28300000000000	109481171429000	50920950138000	36027143785000	26280542847000	20957876300000	1.71038e+13	14483353341000	11984049029000	10078888501000	8571811338000	7.26687e+12	5928295886000	4797846160000	3.84092e+12	2965075617000	2215026567000	1515541976000	852992847000
69	315	31100000000000	1.21305e+14	58895983894000	4.26743e+13	31884398913000	25834962820000	21390873273000	18314373882000	1.53224e+13	13003160044000	1.11458e+13	9518977284000	7826530523000	6.37536e+12	5127009160000	3974338664000	2.97894e+12	2043657506000	1152381577000
69	316	36300000000000	1.41587e+14	68743543902000	4.98096e+13	37215552429000	3.01546e+13	2.49675e+13	21376584306000	17884344621000	15177321852000	1.30094e+13	11110574772000	9135146559000	7.44134e+12	5984258280000	4638858312000	3.47702e+12	2385362298000	1345062741000
69	317	40200000000000	1.56799e+14	76129213908000	5.5161e+13	41213917566000	3.33944e+13	2.76499e+13	23673242124000	19805803134000	16807943208000	1.44071e+13	12304272888000	10116608586000	8.24082e+12	6627195120000	5137248048000	3.85059e+12	2641640892000	1489573614000
69	318	44000000000000	1.71621e+14	83325507760000	6.03753e+13	45109760520000	36551072800000	3.02636e+13	25911011280000	21677993480000	18396753760000	1.5769e+13	13467363360000	11072904920000	9019803320000	7253646400000	5622858560000	4.21457e+12	2891348240000	1630379080000
69	319	49100000000000	1.91513e+14	92983691614000	6.73733e+13	50338391853000	40787674420000	3.37714e+13	28914333042000	24190669997000	20529104764000	1.75968e+13	15028353204000	12356355263000	10065280523000	8094409960000	6274598984000	4703079834000	3226481786000	1819354837000
69	320	53500000000000	2.08675e+14	101316242390000	7.34108e+13	54849367905000	44442781700000	36797804505000	31505434170000	2.63585e+13	22368780140000	1.91737e+13	16375089540000	13463645755000	1.09673e+13	8819774600000	6836884840000	5124537090000	3515616610000	1982392745000
69	321	53400000000000	2.08285e+14	101126866236000	7.32736e+13	54746845722000	44359711080000	36729023562000	31446545508000	2.63092e+13	22326969336000	1.91378e+13	16344481896000	13438480062000	1.09468e+13	8803289040000	6824105616000	5114958516000	3509045364000	1978687338000
69	322	54700000000000	2.13356e+14	103588756238000	7.50574e+13	56079634101000	45439629140000	37623175821000	32212098114000	2.69497e+13	22870509788000	1.96037e+13	16742381268000	13765634071000	1.12133e+13	9017601320000	6990235528000	5239479978000	3594471562000	2026857629000
69	323	62500000000000	2.4378e+14	118360096250000	8.57603e+13	64076364375000	51919137500000	42988089375000	36805413750000	3.07926e+13	26131752500000	2.23991e+13	19129777500000	15728558125000	1.28122e+13	10303475000000	7987015000000	5.98661e+12	4107028750000	2315879375000
69	324	71000000000000	2.76934e+14	134457069340000	9.74237e+13	72790749930000	5.89801e+13	4.88345e+13	41810950020000	3.49804e+13	29685670840000	2.54454e+13	21731427240000	17867642030000	1.45547e+13	11704747600000	9073249040000	6.80079e+12	4665584660000	2630838970000
69	325	83700000000000	3.2647e+14	158507840898000	1.1485e+14	85811067171000	6.95301e+13	5.75696e+13	49289810094000	41237455779000	34995642948000	2.99969e+13	25618598028000	21063685041000	1.71581e+13	13798413720000	10696210488000	8.01727e+12	5500132902000	3101425659000
69	326	91500000000000	3.56894e+14	173279180910000	1.25553e+14	93807797445000	76009617300000	6.29346e+13	53883125730000	45080372805000	38256885660000	3.27923e+13	28005994260000	23026609095000	18757090995000	15084287400000	11692989960000	8.7644e+12	6012690090000	3390447405000
69	327	90900000000000	3.54553e+14	172142923986000	1.2473e+14	93192664347000	75511193580000	6.25219e+13	53529793758000	44784763803000	38006020836000	3.25773e+13	27822348396000	22875614937000	18634093677000	14985374040000	11616314616000	8.70692e+12	5973262614000	3368214963000
69	328	98600000000000	3.84587e+14	186724887844000	1.35295e+14	101086872438000	81907631320000	6.7818e+13	58064220732000	48578412662000	41225452744000	3.53369e+13	30179136984000	24813373298000	20212559258000	16254762160000	12600314864000	9444473964000	6479248556000	3653531302000
69	329	107000000000000	4.17351e+14	202632484780000	1.46822e+14	109698735810000	88885563400000	73595609010000	63010868340000	5.27169e+13	44737560280000	3.83473e+13	32750179080000	26927291510000	2.19345e+13	17639549200000	13673769680000	10249074180000	7031233220000	3964785490000
69	330	103000000000000	4.01749e+14	195057438620000	1.41333e+14	105597848490000	85562738600000	70844371290000	60655321860000	5.07462e+13	43065128120000	3.69138e+13	31525873320000	25920663790000	21114539590000	16980126800000	13162600720000	9865931220000	6768383380000	3816569210000
69	331	103000000000000	4.01749e+14	195057438620000	1.41333e+14	105597848490000	85562738600000	70844371290000	60655321860000	5.07462e+13	43065128120000	3.69138e+13	31525873320000	25920663790000	21114539590000	16980126800000	13162600720000	9865931220000	6768383380000	3816569210000
69	332	105000000000000	4.0955e+14	198844961700000	1.44077e+14	107648292150000	87224151000000	72219990150000	61833095100000	5.17316e+13	43901344200000	3.76305e+13	32138026200000	26423977650000	2.15245e+13	17309838000000	13418185200000	10057502700000	6899808300000	3890677350000
69	333	105000000000000	4.0955e+14	198844961700000	1.44077e+14	107648292150000	87224151000000	72219990150000	61833095100000	5.17316e+13	43901344200000	3.76305e+13	32138026200000	26423977650000	2.15245e+13	17309838000000	13418185200000	10057502700000	6899808300000	3890677350000
69	334	109000000000000	4.25152e+14	206420007860000	1.49566e+14	111749179470000	90546975800000	74971227870000	64188641580000	5.37023e+13	45573776360000	3.90641e+13	33362331960000	27430605370000	2.23445e+13	17969260400000	13929354160000	10440645660000	7162658140000	4038893630000
69	335	105000000000000	418411237650000	2.2324e+14	171907323000000	136241315700000	1.15106e+14	9.89226e+13	87115847700000	74955541500000	65073095850000	5.6734e+13	49218900150000	41168265600000	3.39999e+13	2.76385e+13	21635539800000	16344813450000	11283366150000	6390275850000
69	336	99800000000000	397689919214000	212184465630000	163393817480000	129494126732000	1.09406e+14	9.40235e+13	82801539052000	71243457540000	61850428246000	5.39243e+13	46781392714000	39129456256000	3.23161e+13	2.62698e+13	20564065448000	15535356022000	10724570874000	6073805046000
69	337	105000000000000	418411237650000	2.2324e+14	171907323000000	136241315700000	1.15106e+14	9.89226e+13	87115847700000	74955541500000	65073095850000	5.6734e+13	49218900150000	41168265600000	3.39999e+13	2.76385e+13	21635539800000	16344813450000	11283366150000	6390275850000
69	338	114000000000000	454275058020000	2.42375e+14	186642236400000	147919142760000	1.24973e+14	1.07402e+14	94582920360000	81380302200000	70650789780000	6.1597e+13	53437663020000	44696974080000	36914187240000	3.00076e+13	23490014640000	17745797460000	12250511820000	6938013780000
69	339	121000000000000	482169140530000	2.57258e+14	198102724600000	157001897140000	1.32646e+14	1.13996e+14	100390643540000	86377338300000	74988996170000	6.53792e+13	56718923030000	47441525120000	39180847860000	3.18501e+13	24932383960000	18835451690000	13002736230000	7364032170000
69	340	121000000000000	482169140530000	2.57258e+14	198102724600000	157001897140000	1.32646e+14	1.13996e+14	100390643540000	86377338300000	74988996170000	6.53792e+13	56718923030000	47441525120000	39180847860000	3.18501e+13	24932383960000	18835451690000	13002736230000	7364032170000
69	341	122000000000000	486154009460000	2.59384e+14	199739937200000	158299433480000	1.33743e+14	1.14939e+14	101220318280000	87091200600000	75608739940000	6.59195e+13	57187674460000	47833603840000	39504656520000	3.21133e+13	25138436720000	18991116580000	13110196860000	7424891940000
69	342	124000000000000	494123747320000	2.63636e+14	203014362400000	160894506160000	1.35935e+14	1.16823e+14	102879667760000	88518925200000	76848227480000	6.70002e+13	58125177320000	48617761280000	40152273840000	3.26398e+13	25550542240000	19302446360000	13325118120000	7546611480000
69	343	115000000000000	458259926950000	2.44501e+14	188279449000000	149216679100000	1.26069e+14	1.08344e+14	95412595100000	82094164500000	71270533550000	6.21373e+13	53906414450000	45089052800000	37237995900000	3.02708e+13	23696067400000	17901462350000	12357972450000	6998873550000
69	344	114000000000000	454275058020000	2.42375e+14	186642236400000	147919142760000	1.24973e+14	1.07402e+14	94582920360000	81380302200000	70650789780000	6.1597e+13	53437663020000	44696974080000	36914187240000	3.00076e+13	23490014640000	17745797460000	12250511820000	6938013780000
69	345	120000000000000	478184271600000	2.55132e+14	196465512000000	155704360800000	1.3155e+14	1.13054e+14	99560968800000	85663476000000	74369252400000	6.48389e+13	56250171600000	47049446400000	38857039200000	3.15869e+13	24726331200000	18679786800000	12895275600000	7303172400000
69	346	120000000000000	478184271600000	2.55132e+14	196465512000000	155704360800000	1.3155e+14	1.13054e+14	99560968800000	85663476000000	74369252400000	6.48389e+13	56250171600000	47049446400000	38857039200000	3.15869e+13	24726331200000	18679786800000	12895275600000	7303172400000
69	347	121000000000000	482169140530000	2.57258e+14	198102724600000	157001897140000	1.32646e+14	1.13996e+14	100390643540000	86377338300000	74988996170000	6.53792e+13	56718923030000	47441525120000	39180847860000	3.18501e+13	24932383960000	18835451690000	13002736230000	7364032170000
69	348	121000000000000	482169140530000	2.57258e+14	198102724600000	157001897140000	1.32646e+14	1.13996e+14	100390643540000	86377338300000	74988996170000	6.53792e+13	56718923030000	47441525120000	39180847860000	3.18501e+13	24932383960000	18835451690000	13002736230000	7364032170000
69	349	121000000000000	482169140530000	2.57258e+14	198102724600000	157001897140000	1.32646e+14	1.13996e+14	100390643540000	86377338300000	74988996170000	6.53792e+13	56718923030000	47441525120000	39180847860000	3.18501e+13	24932383960000	18835451690000	13002736230000	7364032170000
69	350	0	0	0	0	0	0	0	0	0	0	0	0	0	0	0	0	0	0	0
68	280	0	0	0	0	0	0	0	0	0	0	0	0	0	0	0	0	0	0	0
68	281	0	0	0	0	0	0	0	0	0	0	0	0	0	0	0	0	0	0	0
68	282	0	0	0	0	0	0	0	0	0	0	0	0	0	0	0	0	0	0	0
68	283	0	0	0	0	0	0	0	0	0	0	0	0	0	0	0	0	0	0	0
68	284	0	0	0	0	0	0	0	0	0	0	0	0	0	0	0	0	0	0	0
68	285	0	0	0	0	0	0	0	0	0	0	0	0	0	0	0	0	0	0	0
68	286	0	0	0	0	0	0	0	0	0	0	0	0	0	0	0	0	0	0	0
68	287	0	0	0	0	0	0	0	0	0	0	0	0	0	0	0	0	0	0	0
68	288	0	0	0	0	0	0	0	0	0	0	0	0	0	0	0	0	0	0	0
68	289	0	0	0	0	0	0	0	0	0	0	0	0	0	0	0	0	0	0	0
68	290	0	0	0	0	0	0	0	0	0	0	0	0	0	0	0	0	0	0	0
68	291	107000000000	407469255160	175024911880	118502005660	82480541260	63591846240	50311099330	4.15972e+10	33642463850	27768116770	23263693900	19444923820	1.56246e+10	12490562610	9.90322e+09	7577511020	5620145040	3823318650	2143215350
68	292	0	0	0	0	0	0	0	0	0	0	0	0	0	0	0	0	0	0	0
68	293	0	0	0	0	0	0	0	0	0	0	0	0	0	0	0	0	0	0	0
68	294	81500000000	310362096220	133313367460	90260873470	6.2824e+10	48436780080	38321070985	3.16838e+10	25624867325	21150481465	17719542550	14810853190	1.1901e+10	9513839745	7.54311e+09	5771655590	4.28076e+09	2912153925	1632449075
68	295	0	0	0	0	0	0	0	0	0	0	0	0	0	0	0	0	0	0	0
68	296	202000000000	769241023760	330420861680	223714066760	155710928360	120051896640	94979832380	7.85292e+10	63511941100	52422052220	43918375400	36709108520	2.94969e+10	23580314460	1.86958e+10	14305207720	10609993440	7217853900	4046070100
68	297	44200000000	168319075496	72300010328	48951295796	3.40714e+10	26268781344	20782715798	17183123048	13897167310	11470567862	9609862340	8032389092	6.45427e+09	5159652966	4.09086e+09	3130149412	2321592624	1579352190	885328210
68	298	262000000000	997728456560	428565672080	290163789560	2.01962e+11	155710875840	123191663780	1.01855e+11	82376874100	67992958820	56963437400	47612804120	3.82583e+10	30584368260	2.4249e+10	18554279320	13761476640	9361770900	5247873100
68	299	214000000000	814938510320	350049823760	237004011320	164961082520	127183692480	100622198660	8.31943e+10	67284927700	55536233540	46527387800	38889847640	3.12492e+10	24981125220	1.98064e+10	15155022040	11240290080	7646637300	4286430700
68	300	233000000000	887292864040	381129013720	258046423540	179607159940	138475702560	109555945270	9.05807e+10	73258823150	60467020630	50658324100	42342684580	3.40236e+10	27199075590	2.1565e+10	16500561380	12238259760	8325544350	4667001650
68	301	659000000000	2509553636920	1077957167560	729839455420	5.07988e+11	391654454880	309859948210	2.56192e+11	207199847450	171020457490	143278264300	119758923340	9.623e+10	76927857570	6.09928e+10	46668969740	34613790480	23547355050	13199802950
68	302	406000000000	1.56235e+12	709381522780	4.94363e+11	355726436940	280175277340	2.26074e+11	189780132500	155837688020	1.30246e+11	110216263780	92997807840	75540583300	6.0933e+10	48625186820	3.74281e+10	27894404580	1.90498e+10	1.07076e+10
68	303	869000000000	3.34405e+12	1518356017970	1.05813e+12	761394762810	599685507410	4.83888e+11	406204273750	333554066230	2.78777e+11	235906239470	199051958160	161686617950	1.30421e+11	104077062430	8.01108e+10	59705018670	4.0774e+10	2.29186e+10
68	304	975000000000	3.75195e+12	1703564001750	1.1872e+12	854269152750	672834717750	5.42912e+11	455752781250	374240753250	3.12782e+11	264681914250	223332174000	181409036250	146329296750	116772308250	8.98826e+10	66987794250	4.57476e+10	2.57142e+10
68	305	1210000000000	4.65627e+12	2114166607300	1.47335e+12	1060169922900	835005136900	6.73768e+11	565600887500	464442370700	3.88171e+11	328477042300	277160954400	225133265500	1.81598e+11	144917428700	1.11547e+11	83133570300	5.67739e+10	3.1912e+10
68	306	1780000000000	6.84972e+12	3110096331400	2.1674e+12	1559588812200	1228354664200	9.91162e+11	832040975000	683229272600	5.71028e+11	483214161400	407724379200	331187779000	2.67145e+11	213184316600	1.64093e+11	122295665400	8.35186e+10	4.69449e+10
68	307	2950000000000	1.13521e+13	5154373133500	3.59205e+12	2584711795500	2035756325500	1.64266e+12	1378944312500	1132318176500	9.46367e+11	800832458500	675722988000	548878622500	4.4274e+11	353311086500	2.71953e+11	202681018500	1.38416e+11	77801884000
68	308	3600000000000	1.38534e+13	6290082468000	4.38351e+12	3154224564000	2484312804000	2.0046e+12	1682779500000	1381812012000	1.15489e+12	977287068000	824611104000	669817980000	5.40293e+11	431159292000	3.31874e+11	247339548000	1.68914e+11	9.49447e+10
68	309	8450000000000	3.26896e+13	15204311967000	10757221377500	7847017210500	6257740450000	5106973144000	4324534831500	3578276123500	3009420771500	2559427767000	2.16979e+12	1770109549000	1432572440000	1146847266500	885331765500	661377190500	452520484000	254692210500
68	310	18400000000000	71182104392000	33107614224000	23424008680000	1.7087e+13	13626322400000	1.11205e+13	9416738568000	7791749192000	6553058248000	5573191824000	4724749608000	3854439728000	3119447680000	2.49728e+12	1927823016000	1440158616000	985370048000	554596056000
68	311	21600000000000	83561600808000	38865460176000	27497749320000	20058647544000	15996117600000	1.30545e+13	11054432232000	9146836008000	7692720552000	6542442576000	5546445192000	4524777072000	3661960320000	2.93159e+12	2263096584000	1690620984000	1156738752000	651047544000
68	312	24500000000000	94780519435000	44083508070000	31189576775000	22751706705000	18143744500000	1.48072e+13	12538592115000	10374883435000	8725539515000	7420826070000	6.29111e+12	5132270290000	4153612400000	3.32518e+12	2566938255000	1917602505000	1312041640000	738456705000
68	313	27500000000000	106386297325000	49481488650000	3.50087e+13	25537629975000	20365427500000	1.66203e+13	14073929925000	11645277325000	9793972925000	8329498650000	7.06145e+12	5760711550000	4662218000000	3.73234e+12	2881257225000	2152410975000	1472699800000	828879975000
68	314	30200000000000	116831497426000	54339671172000	38445927290000	28044960918000	22364942200000	18252140704000	15455733954000	12788631826000	10755562994000	9147303972000	7.75475e+12	6326308684000	5119963040000	4.09879e+12	3164144298000	2363738598000	1617292144000	910260918000
68	315	33100000000000	1.29106e+14	62683506974000	4.54187e+13	33934842573000	2.74964e+13	22766492133000	19492147122000	1.63078e+13	13839376124000	1.18626e+13	10131130164000	8329844383000	6.78535e+12	5456720360000	4229923144000	3.17051e+12	2175082426000	1226489717000
68	316	38700000000000	1.50948e+14	73288571598000	5.31028e+13	39676084821000	3.21483e+13	2.66182e+13	22789912194000	19066780629000	16180781148000	1.38695e+13	11845158228000	9739123191000	7.93333e+12	6379911720000	4945559688000	3.70691e+12	2543072202000	1433992509000
68	317	42700000000000	1.6655e+14	80863617758000	5.85914e+13	43776972141000	35471154740000	2.93695e+13	25145458674000	21037507309000	17853213308000	1.53031e+13	13069463988000	10745750911000	8.75331e+12	7039334120000	5456728648000	4.09005e+12	2805922042000	1582208789000
68	318	46600000000000	1.81762e+14	88249287764000	6.39429e+13	47775337278000	38710908920000	3.20519e+13	27442116492000	22958965822000	19483834664000	1.67008e+13	14263162104000	11727212938000	9552791698000	7682270960000	5955118384000	4463615484000	3062200636000	1726719662000
68	319	52000000000000	2.02825e+14	98475600080000	7.13526e+13	53311535160000	43196722400000	35766090360000	30622104240000	2.56194e+13	21741618080000	1.86361e+13	15915974880000	13086160360000	10659767560000	8572491200000	6645196480000	4980858480000	3417047920000	1926811640000
68	320	56500000000000	2.20377e+14	106997527010000	7.75273e+13	57925033395000	46934900300000	38861232795000	33272094030000	2.78365e+13	23623104260000	2.02488e+13	17293318860000	14218616545000	1.15822e+13	9314341400000	7220261560000	5411894310000	3712753990000	2093554955000
68	321	56400000000000	2.19987e+14	106808150856000	7.73901e+13	57822511212000	46851829680000	38792451852000	33213205368000	2.77872e+13	23581293456000	2.0213e+13	17262711216000	14193450852000	1.15617e+13	9297855840000	7207482336000	5402315736000	3706182744000	2089849548000
68	322	57600000000000	2.24667e+14	109080664704000	7.90367e+13	59052777408000	47848677120000	39617823168000	33919869312000	2.83785e+13	24083023104000	2.0643e+13	17630002944000	14495439168000	1.18077e+13	9495682560000	7360833024000	5517258624000	3785037696000	2134314432000
68	323	65600000000000	2.55871e+14	124230757024000	9.0014e+13	67254552048000	5.44943e+13	45120298608000	38630962272000	3.23199e+13	27427887424000	2.35101e+13	20078614464000	16508694608000	1.34477e+13	10814527360000	8383170944000	6.28354e+12	4310737376000	2430746992000
68	324	74500000000000	2.90585e+14	141085234730000	1.02226e+14	76379026335000	6.18876e+13	5.12418e+13	43872053190000	36704784415000	31149048980000	2.66998e+13	22802694780000	18748441285000	1.52722e+13	12281742200000	9520521880000	7.13604e+12	4895578270000	2760528215000
68	325	87700000000000	3.42072e+14	166082887058000	1.20339e+14	89911954491000	72852933740000	6.03209e+13	51645356574000	43208182459000	36668075108000	3.14305e+13	26842903788000	22070312761000	17978107981000	14457836120000	11207379448000	8.40041e+12	5762982742000	3249641939000
68	326	95800000000000	3.73666e+14	181422355532000	1.31453e+14	98216251314000	79581653960000	6.58921e+13	56415338196000	47198903986000	40054750232000	3.43334e+13	29322122952000	24108733894000	19638571774000	15793166480000	12242496592000	9176273892000	6295253668000	3549779906000
68	327	95100000000000	3.70935e+14	180096722454000	1.30493e+14	97498596033000	79000159620000	6.54107e+13	56003117562000	46854026817000	39762074604000	3.40825e+13	29107869444000	23932574043000	19495074903000	15677767560000	12153042024000	9109223874000	6249254946000	3523842057000
68	328	103000000000000	4.01749e+14	195057438620000	1.41333e+14	105597848490000	85562738600000	70844371290000	60655321860000	5.07462e+13	43065128120000	3.69138e+13	31525873320000	25920663790000	21114539590000	16980126800000	13162600720000	9865931220000	6768383380000	3816569210000
68	329	112000000000000	4.36853e+14	212101292480000	1.53682e+14	114824844960000	93039094400000	77034656160000	65955301440000	5.51803e+13	46828100480000	4.01392e+13	34280561280000	28185576160000	2.29595e+13	18463827200000	14312730880000	10728002880000	7359795520000	4150055840000
68	330	108000000000000	4.21251e+14	204526246320000	1.48194e+14	110723957640000	89716269600000	74283418440000	63599754960000	5.32096e+13	45155668320000	3.87057e+13	33056255520000	27178948440000	2.21395e+13	17804404800000	13801561920000	10344859920000	7096945680000	4001839560000
68	331	108000000000000	4.21251e+14	204526246320000	1.48194e+14	110723957640000	89716269600000	74283418440000	63599754960000	5.32096e+13	45155668320000	3.87057e+13	33056255520000	27178948440000	2.21395e+13	17804404800000	13801561920000	10344859920000	7096945680000	4001839560000
68	332	109000000000000	4.25152e+14	206420007860000	1.49566e+14	111749179470000	90546975800000	74971227870000	64188641580000	5.37023e+13	45573776360000	3.90641e+13	33362331960000	27430605370000	2.23445e+13	17969260400000	13929354160000	10440645660000	7162658140000	4038893630000
68	333	109000000000000	4.25152e+14	206420007860000	1.49566e+14	111749179470000	90546975800000	74971227870000	64188641580000	5.37023e+13	45573776360000	3.90641e+13	33362331960000	27430605370000	2.23445e+13	17969260400000	13929354160000	10440645660000	7162658140000	4038893630000
68	334	113000000000000	4.40754e+14	213995054020000	1.55055e+14	115850066790000	93869800600000	77722465590000	66544188060000	5.5673e+13	47246208520000	4.04976e+13	34586637720000	28437233090000	2.31645e+13	18628682800000	14440523120000	10823788620000	7425507980000	4187109910000
68	335	109000000000000	434350713370000	2.31745e+14	178456173400000	141431461060000	1.19491e+14	1.02691e+14	90434546660000	77810990700000	67552070930000	5.88953e+13	51093905870000	42736580480000	35295143940000	2.86914e+13	22459750840000	16967473010000	11713208670000	6633714930000
68	336	104000000000000	414426368720000	221114072400000	170270110400000	134943779360000	1.1401e+14	9.79804e+13	86286172960000	74241679200000	64453352080000	5.61937e+13	48750148720000	40776186880000	3.36761e+13	2.73753e+13	21429487040000	16189148560000	11175905520000	6329416080000
68	337	109000000000000	434350713370000	2.31745e+14	178456173400000	141431461060000	1.19491e+14	1.02691e+14	90434546660000	77810990700000	67552070930000	5.88953e+13	51093905870000	42736580480000	35295143940000	2.86914e+13	22459750840000	16967473010000	11713208670000	6633714930000
68	338	118000000000000	470214533740000	2.50879e+14	193191086800000	153109288120000	1.29358e+14	1.1117e+14	97901619320000	84235751400000	73129764860000	6.37582e+13	55312668740000	46265288960000	38209421880000	3.10605e+13	24314225680000	18368457020000	12680354340000	7181452860000
68	339	125000000000000	498108616250000	2.65762e+14	204651575000000	162192042500000	1.37031e+14	1.17765e+14	103709342500000	89232787500000	77467971250000	6.75405e+13	58593928750000	49009840000000	40476082500000	3.2903e+13	25756595000000	19458111250000	13432578750000	7607471250000
68	340	125000000000000	498108616250000	2.65762e+14	204651575000000	162192042500000	1.37031e+14	1.17765e+14	103709342500000	89232787500000	77467971250000	6.75405e+13	58593928750000	49009840000000	40476082500000	3.2903e+13	25756595000000	19458111250000	13432578750000	7607471250000
68	341	126000000000000	502093485180000	2.67888e+14	206288787600000	163489578840000	1.38128e+14	1.18707e+14	104539017240000	89946649800000	78087715020000	6.80808e+13	5.90627e+13	49401918720000	40799891160000	3.31662e+13	25962647760000	19613776140000	13540039380000	7668331020000
68	342	128000000000000	5.10063e+14	2.7214e+14	209563212800000	166084651520000	1.4032e+14	1.20591e+14	106198366720000	91374374400000	79327202560000	6.91615e+13	6.00002e+13	50186076160000	41447508480000	3.36927e+13	26374753280000	19925105920000	13754960640000	7790050560000
68	343	118000000000000	470214533740000	2.50879e+14	193191086800000	153109288120000	1.29358e+14	1.1117e+14	97901619320000	84235751400000	73129764860000	6.37582e+13	55312668740000	46265288960000	38209421880000	3.10605e+13	24314225680000	18368457020000	12680354340000	7181452860000
68	344	117000000000000	466229664810000	2.48753e+14	191553874200000	151811751780000	1.28261e+14	1.10228e+14	97071944580000	83521889100000	72510021090000	6.32179e+13	54843917310000	45873210240000	37885613220000	3.07972e+13	24108172920000	18212792130000	12572893710000	7120593090000
68	345	123000000000000	490138878390000	2.6151e+14	201377149800000	159596969820000	1.34839e+14	1.15881e+14	102049993020000	87805062900000	76228483710000	6.64599e+13	57656425890000	48225682560000	39828465180000	3.23766e+13	25344489480000	19146781470000	13217657490000	7485751710000
68	346	124000000000000	494123747320000	2.63636e+14	203014362400000	160894506160000	1.35935e+14	1.16823e+14	102879667760000	88518925200000	76848227480000	6.70002e+13	58125177320000	48617761280000	40152273840000	3.26398e+13	25550542240000	19302446360000	13325118120000	7546611480000
68	347	124000000000000	494123747320000	2.63636e+14	203014362400000	160894506160000	1.35935e+14	1.16823e+14	102879667760000	88518925200000	76848227480000	6.70002e+13	58125177320000	48617761280000	40152273840000	3.26398e+13	25550542240000	19302446360000	13325118120000	7546611480000
68	348	125000000000000	498108616250000	2.65762e+14	204651575000000	162192042500000	1.37031e+14	1.17765e+14	103709342500000	89232787500000	77467971250000	6.75405e+13	58593928750000	49009840000000	40476082500000	3.2903e+13	25756595000000	19458111250000	13432578750000	7607471250000
68	349	125000000000000	498108616250000	2.65762e+14	204651575000000	162192042500000	1.37031e+14	1.17765e+14	103709342500000	89232787500000	77467971250000	6.75405e+13	58593928750000	49009840000000	40476082500000	3.2903e+13	25756595000000	19458111250000	13432578750000	7607471250000
68	350	0	0	0	0	0	0	0	0	0	0	0	0	0	0	0	0	0	0	0
67	280	0	0	0	0	0	0	0	0	0	0	0	0	0	0	0	0	0	0	0
67	281	0	0	0	0	0	0	0	0	0	0	0	0	0	0	0	0	0	0	0
67	282	0	0	0	0	0	0	0	0	0	0	0	0	0	0	0	0	0	0	0
67	283	0	0	0	0	0	0	0	0	0	0	0	0	0	0	0	0	0	0	0
67	284	0	0	0	0	0	0	0	0	0	0	0	0	0	0	0	0	0	0	0
67	285	0	0	0	0	0	0	0	0	0	0	0	0	0	0	0	0	0	0	0
67	286	0	0	0	0	0	0	0	0	0	0	0	0	0	0	0	0	0	0	0
67	287	0	0	0	0	0	0	0	0	0	0	0	0	0	0	0	0	0	0	0
67	288	0	0	0	0	0	0	0	0	0	0	0	0	0	0	0	0	0	0	0
67	289	0	0	0	0	0	0	0	0	0	0	0	0	0	0	0	0	0	0	0
67	290	0	0	0	0	0	0	0	0	0	0	0	0	0	0	0	0	0	0	0
67	291	121000000000	460782989480	197925367640	134006940980	9.32724e+10	71912274720	56893859990	4.70398e+10	38044281550	31401328310	26307541700	21989119460	1.76689e+10	14124841830	1.1199e+10	8568961060	6355491120	4323565950	2423636050
67	292	0	0	0	0	0	0	0	0	0	0	0	0	0	0	0	0	0	0	0
67	293	0	0	0	0	0	0	0	0	0	0	0	0	0	0	0	0	0	0	0
67	294	81900000000	311885345772	133967666196	90703871622	6.31323e+10	48674506608	38509149861	3.18393e+10	25750633545	21254287509	17806509630	14883544494	1.19594e+10	9560533437	7.58013e+09	5799982734	4301774568	2926446705	1640461095
67	295	0	0	0	0	0	0	0	0	0	0	0	0	0	0	0	0	0	0	0
67	296	226000000000	860635996880	369678785840	250293955880	174211236680	134315488320	106264564940	8.78594e+10	71057914300	58650414860	49136400200	41070586760	3.30015e+10	26381935980	2.09171e+10	16004836360	11870586720	8075420700	4526791300
67	297	44700000000	170223137436	73117883748	49505043486	34456824246	26565939504	21017814393	17377502268	14054375085	11600325417	9718571190	8123253222	6.52728e+09	5218020081	4.13714e+09	3165558342	2347854984	1597218165	895343235
67	298	263000000000	1001536580440	430201418920	291271284940	2.02733e+11	156305192160	123661860970	1.02243e+11	82691289650	68252473930	57180855100	47794532380	3.84044e+10	30701102490	2.43416e+10	18625097180	13814001360	9397502850	5267903150
67	299	188000000000	715927289440	307520405920	208209131440	144919081840	111731468160	88397071720	73086586720	59110123400	48788840680	40874527600	34164912880	2.74526e+10	21946035240	1.74001e+10	13313757680	9874647360	6717606600	3765649400
67	300	224000000000	853019749120	366407292160	248078965120	172669544320	133126855680	105324170560	8.70819e+10	70429083200	58131384640	48701564800	40707130240	3.27094e+10	26148467520	2.0732e+10	15863200640	11765537280	8003956800	4486731200
67	301	607000000000	2311531195160	992898331880	672249695660	4.67904e+11	360750006240	285409694330	2.35976e+11	190850238850	157525671770	131972543900	110309053820	8.86367e+10	70857677610	5.618e+10	42986441020	31882505040	21689293650	12158240350
67	302	515000000000	1.9818e+12	899831241950	6.27086e+11	451229347350	355394748350	2.86769e+11	240730956250	197675885050	1.65213e+11	139806344450	117965199600	95821183250	77291884950	61679732050	4.74765e+10	35383296450	2.41641e+10	1.35824e+10
67	303	947000000000	3.6442e+12	1654641138110	1.15311e+12	829736295030	653512284830	5.27321e+11	442664496250	363493326490	3.038e+11	257080792610	216918532080	176199340850	142127019510	113418847090	8.73014e+10	65064042210	4.44338e+10	2.49757e+10
67	304	1190000000000	4.57931e+12	2079221704700	1.44899e+12	1042646453100	821203399100	6.62631e+11	556252112500	456765637300	3.81755e+11	323047669700	272579781600	221412054500	178596782700	142522099300	1.09703e+11	81759461700	5.58355e+10	3.13845e+10
67	305	1480000000000	5.69527e+12	2585922792400	1.80211e+12	1296736765200	1021328597200	8.24112e+11	691809350000	568078271600	4.74788e+11	401773572400	339006787200	275369614000	2.2212e+11	177254375600	1.36437e+11	101684036400	6.94424e+10	39032809600
67	306	2250000000000	8.65835e+12	3931301542500	2.7397e+12	1971390352500	1552695502500	1.25287e+12	1051737187500	863632507500	7.21806e+11	610804417500	515381940000	418636237500	337682992500	269474557500	2.07421e+11	154587217500	1.05571e+11	5.93404e+10
67	307	3500000000000	1.34685e+13	6115357955000	4.26175e+12	3066607215000	2415304115000	1.94891e+12	1636035625000	1343428345000	1.12281e+12	950140205000	801705240000	651211925000	5.25285e+11	419182645000	3.22656e+11	240469005000	1.64222e+11	9.23073e+10
67	308	4440000000000	1.70858e+13	7757768377200	5.40633e+12	3890210295600	3063985791600	2.47234e+12	2075428050000	1704234814800	1.42436e+12	1205320717200	1017020361600	826108842000	666361105200	531763126800	4.09312e+11	305052109200	2.08327e+11	1.17098e+11
67	309	10700000000000	41393941141000	19252797402000	13621570265000	9936459663000	7924002700000	6.46682e+12	5476038189000	4531071541000	3810745829000	3240932202000	2747544609000	2241440494000	1814026640000	1.45222e+12	1121070993000	837483543000	573014104000	322509663000
67	310	20400000000000	78919289652000	36706267944000	25970096580000	18944278236000	15107444400000	1.23293e+13	10440297108000	8638678452000	7265347188000	6178973544000	5238309348000	4273400568000	3458518080000	2.76872e+12	2137368996000	1596697596000	1092475488000	614878236000
67	311	23000000000000	88977630490000	41384517780000	29280010850000	21358745070000	17032903000000	1.39006e+13	11770923210000	9739686490000	8191322810000	6966489780000	5905937010000	4818049660000	3899309600000	3.1216e+12	2409778770000	1800198270000	1231712560000	693245070000
67	312	26300000000000	101743986169000	47322296418000	3.34811e+13	24423260667000	19476754300000	1.58951e+13	13459794801000	11137119769000	9366599561000	7966029618000	6.75331e+12	5509335046000	4458775760000	3.56948e+12	2755529637000	2058487587000	1408436536000	792710667000
67	313	29500000000000	114123482585000	53080142370000	37554796525000	27394912155000	21846549500000	17829077840000	15097488465000	12492206585000	10506261865000	8935280370000	7.57501e+12	6179672390000	5001288400000	4.00379e+12	3090803205000	2308949955000	1579805240000	889162155000
67	314	32400000000000	1.25342e+14	58298190264000	41246623980000	30087971316000	23994176400000	19581766848000	16581648348000	13720254012000	11539080828000	9813663864000	8.31967e+12	6787165608000	5492940480000	4.39738e+12	3394644876000	2535931476000	1735108128000	976571316000
67	315	35400000000000	1.38077e+14	67039158516000	4.85746e+13	36292852782000	2.9407e+13	2.43485e+13	20846586348000	1.74409e+13	14801024616000	1.26869e+13	10835105976000	8908655322000	7.25684e+12	5835888240000	4523845296000	3.39082e+12	2326221084000	1311714078000
67	316	41400000000000	1.6148e+14	78401727756000	5.68076e+13	42444183762000	3.43912e+13	2.84753e+13	24379906068000	20397021138000	17309672856000	1.48372e+13	12671564616000	10418596902000	8.48681e+12	6825021840000	5290598736000	3.96553e+12	2720495844000	1534038498000
67	317	45700000000000	1.78252e+14	86544902378000	6.27079e+13	46852637631000	37963273340000	3.14329e+13	26912118534000	22515552319000	19107537428000	1.63782e+13	13987693308000	11500721701000	9368295721000	7533900920000	5840105368000	4.37741e+12	3003059422000	1693370999000
67	318	49700000000000	1.93854e+14	94119948538000	6.81966e+13	50953524951000	41286098140000	3.41841e+13	29267665014000	2.44863e+13	20779969588000	1.78118e+13	15211999068000	12507349421000	10188277841000	8193323320000	6351274328000	4760551278000	3265909262000	1841587279000
67	319	55500000000000	2.16476e+14	105103765470000	7.61551e+13	56899811565000	46104194100000	38173423365000	32683207410000	2.73438e+13	23204996220000	1.98904e+13	16987242420000	13966959615000	1.13773e+13	9149485800000	7092469320000	5316108570000	3647041530000	2056500885000
67	320	60200000000000	2.34809e+14	114004444708000	8.26043e+13	61718354166000	50008513240000	41406127686000	35450974524000	2.96594e+13	25170104008000	2.15748e+13	18425801688000	15149747186000	1.23407e+13	9924307120000	7693092848000	5766301548000	3955890092000	2230655014000
67	321	60000000000000	2.34029e+14	113625692400000	8.23299e+13	61513309800000	49842372000000	41268565800000	35333197200000	2.95609e+13	25086482400000	2.15032e+13	18364586400000	15099415800000	1.22997e+13	9891336000000	7667534400000	5747144400000	3942747600000	2223244200000
67	322	61000000000000	2.37929e+14	115519453940000	8.37021e+13	62538531630000	50673078200000	41956375230000	35922083820000	3.00536e+13	25504590440000	2.18616e+13	18670662840000	15351072730000	1.25047e+13	10056191600000	7795326640000	5.84293e+12	4008460060000	2260298270000
67	323	69300000000000	2.70303e+14	131237674722000	9.5091e+13	71047872819000	5.75679e+13	47665193499000	40809842766000	3.41428e+13	28974887172000	2.48362e+13	21211097292000	17439825249000	1.42062e+13	11424493080000	8856002232000	6.63795e+12	4553873478000	2567847051000
67	324	78800000000000	3.07357e+14	149228409352000	1.08127e+14	80787480204000	6.54596e+13	5.41994e+13	46404265656000	38823315596000	32946913552000	2.82408e+13	24118823472000	19830566084000	1.61536e+13	12990621280000	10070028512000	7.54792e+12	5178141848000	2919860716000
67	325	92700000000000	3.61574e+14	175551694758000	1.272e+14	95038063641000	77006464740000	6.37599e+13	54589789674000	45671590809000	38758615308000	3.32224e+13	28373285988000	23328597411000	19003085631000	15282114120000	11846340648000	8879338098000	6091545042000	3434912289000
67	326	101000000000000	3.93948e+14	191269915540000	1.38589e+14	103547404830000	83901326200000	6.94688e+13	59477548620000	4.97608e+13	42228912040000	3.6197e+13	30913720440000	25417349930000	20704548530000	16650415600000	12907016240000	9674359740000	6636958460000	3742461070000
67	327	101000000000000	3.93948e+14	191269915540000	1.38589e+14	103547404830000	83901326200000	6.94688e+13	59477548620000	4.97608e+13	42228912040000	3.6197e+13	30913720440000	25417349930000	20704548530000	16650415600000	12907016240000	9674359740000	6636958460000	3742461070000
67	328	108000000000000	4.21251e+14	204526246320000	1.48194e+14	110723957640000	89716269600000	74283418440000	63599754960000	5.32096e+13	45155668320000	3.87057e+13	33056255520000	27178948440000	2.21395e+13	17804404800000	13801561920000	10344859920000	7096945680000	4001839560000
67	329	118000000000000	4.60256e+14	223463861720000	1.61915e+14	120976175940000	98023331600000	81161512740000	69488621160000	5.81364e+13	49336748720000	4.22896e+13	36117019920000	29695517740000	2.41895e+13	19452960800000	15079484320000	11302717320000	7754070280000	4372380260000
67	330	114000000000000	4.44654e+14	215888815560000	1.56427e+14	116875288620000	94700506800000	78410275020000	67133074680000	5.61657e+13	47664316560000	4.0856e+13	34892714160000	28688890020000	2.33695e+13	18793538400000	14568315360000	10919574360000	7491220440000	4224163980000
67	331	113000000000000	4.40754e+14	213995054020000	1.55055e+14	115850066790000	93869800600000	77722465590000	66544188060000	5.5673e+13	47246208520000	4.04976e+13	34586637720000	28437233090000	2.31645e+13	18628682800000	14440523120000	10823788620000	7425507980000	4187109910000
67	332	115000000000000	4.48555e+14	217782577100000	1.57799e+14	117900510450000	95531213000000	79098084450000	67721961300000	5.66584e+13	48082424600000	4.12144e+13	35198790600000	28940546950000	2.35745e+13	18958394000000	14696107600000	11015360100000	7556932900000	4261218050000
67	333	115000000000000	4.48555e+14	217782577100000	1.57799e+14	117900510450000	95531213000000	79098084450000	67721961300000	5.66584e+13	48082424600000	4.12144e+13	35198790600000	28940546950000	2.35745e+13	18958394000000	14696107600000	11015360100000	7556932900000	4261218050000
67	334	119000000000000	4.64157e+14	225357623260000	1.63288e+14	122001397770000	98854037800000	81849322170000	70077507780000	5.86291e+13	49754856760000	4.2648e+13	36423096360000	29947174670000	2.43945e+13	19617816400000	15207276560000	11398503060000	7819782740000	4409434330000
67	335	115000000000000	458259926950000	2.44501e+14	188279449000000	149216679100000	1.26069e+14	1.08344e+14	95412595100000	82094164500000	71270533550000	6.21373e+13	53906414450000	45089052800000	37237995900000	3.02708e+13	23696067400000	17901462350000	12357972450000	6998873550000
67	336	109000000000000	434350713370000	2.31745e+14	178456173400000	141431461060000	1.19491e+14	1.02691e+14	90434546660000	77810990700000	67552070930000	5.88953e+13	51093905870000	42736580480000	35295143940000	2.86914e+13	22459750840000	16967473010000	11713208670000	6633714930000
67	337	115000000000000	458259926950000	2.44501e+14	188279449000000	149216679100000	1.26069e+14	1.08344e+14	95412595100000	82094164500000	71270533550000	6.21373e+13	53906414450000	45089052800000	37237995900000	3.02708e+13	23696067400000	17901462350000	12357972450000	6998873550000
67	338	124000000000000	494123747320000	2.63636e+14	203014362400000	160894506160000	1.35935e+14	1.16823e+14	102879667760000	88518925200000	76848227480000	6.70002e+13	58125177320000	48617761280000	40152273840000	3.26398e+13	25550542240000	19302446360000	13325118120000	7546611480000
67	339	132000000000000	5.26003e+14	2.80645e+14	216112063200000	171274796880000	1.44705e+14	1.2436e+14	109517065680000	94229823600000	81806177640000	7.13228e+13	6.18752e+13	51754391040000	4.27427e+13	3.47456e+13	27198964320000	20547765480000	14184803160000	8033489640000
67	340	132000000000000	5.26003e+14	2.80645e+14	216112063200000	171274796880000	1.44705e+14	1.2436e+14	109517065680000	94229823600000	81806177640000	7.13228e+13	6.18752e+13	51754391040000	4.27427e+13	3.47456e+13	27198964320000	20547765480000	14184803160000	8033489640000
67	341	132000000000000	5.26003e+14	2.80645e+14	216112063200000	171274796880000	1.44705e+14	1.2436e+14	109517065680000	94229823600000	81806177640000	7.13228e+13	6.18752e+13	51754391040000	4.27427e+13	3.47456e+13	27198964320000	20547765480000	14184803160000	8033489640000
67	342	135000000000000	5.37957e+14	287023074750000	221023701000000	175167405900000	1.47994e+14	1.27186e+14	112006089900000	96371410500000	83665408950000	7.29438e+13	6.32814e+13	52930627200000	4.37142e+13	3.55353e+13	27817122600000	21014760150000	14507185050000	8216068950000
67	343	124000000000000	494123747320000	2.63636e+14	203014362400000	160894506160000	1.35935e+14	1.16823e+14	102879667760000	88518925200000	76848227480000	6.70002e+13	58125177320000	48617761280000	40152273840000	3.26398e+13	25550542240000	19302446360000	13325118120000	7546611480000
67	344	123000000000000	490138878390000	2.6151e+14	201377149800000	159596969820000	1.34839e+14	1.15881e+14	102049993020000	87805062900000	76228483710000	6.64599e+13	57656425890000	48225682560000	39828465180000	3.23766e+13	25344489480000	19146781470000	13217657490000	7485751710000
67	345	129000000000000	5.14048e+14	2.74266e+14	211200425400000	167382187860000	1.41416e+14	1.21533e+14	107028041460000	92088236700000	79946946330000	6.97018e+13	6.04689e+13	50578154880000	41771317140000	3.39559e+13	26580806040000	20080770810000	13862421270000	7850910330000
67	346	130000000000000	5.18033e+14	2.76393e+14	212837638000000	168679724200000	1.42513e+14	1.22476e+14	107857716200000	92802099000000	80566690100000	7.02421e+13	6.09377e+13	50970233600000	42095125800000	3.42191e+13	26786858800000	20236435700000	13969881900000	7911770100000
67	347	130000000000000	5.18033e+14	2.76393e+14	212837638000000	168679724200000	1.42513e+14	1.22476e+14	107857716200000	92802099000000	80566690100000	7.02421e+13	6.09377e+13	50970233600000	42095125800000	3.42191e+13	26786858800000	20236435700000	13969881900000	7911770100000
67	348	131000000000000	5.22018e+14	2.78519e+14	214474850600000	169977260540000	1.43609e+14	1.23418e+14	108687390940000	93515961300000	81186433870000	7.07825e+13	6.14064e+13	51362312320000	42418934460000	3.44824e+13	26992911560000	20392100590000	14077342530000	7972629870000
67	349	131000000000000	5.22018e+14	2.78519e+14	214474850600000	169977260540000	1.43609e+14	1.23418e+14	108687390940000	93515961300000	81186433870000	7.07825e+13	6.14064e+13	51362312320000	42418934460000	3.44824e+13	26992911560000	20392100590000	14077342530000	7972629870000
67	350	0	0	0	0	0	0	0	0	0	0	0	0	0	0	0	0	0	0	0
66	280	0	0	0	0	0	0	0	0	0	0	0	0	0	0	0	0	0	0	0
66	281	0	0	0	0	0	0	0	0	0	0	0	0	0	0	0	0	0	0	0
66	282	0	0	0	0	0	0	0	0	0	0	0	0	0	0	0	0	0	0	0
66	283	0	0	0	0	0	0	0	0	0	0	0	0	0	0	0	0	0	0	0
66	284	0	0	0	0	0	0	0	0	0	0	0	0	0	0	0	0	0	0	0
66	285	0	0	0	0	0	0	0	0	0	0	0	0	0	0	0	0	0	0	0
66	286	0	0	0	0	0	0	0	0	0	0	0	0	0	0	0	0	0	0	0
66	287	0	0	0	0	0	0	0	0	0	0	0	0	0	0	0	0	0	0	0
66	288	0	0	0	0	0	0	0	0	0	0	0	0	0	0	0	0	0	0	0
66	289	0	0	0	0	0	0	0	0	0	0	0	0	0	0	0	0	0	0	0
66	290	0	0	0	0	0	0	0	0	0	0	0	0	0	0	0	0	0	0	0
66	291	141000000000	536945467080	230640304440	156156848580	1.08689e+11	83798601120	66297803790	5.48149e+10	44332592550	36591630510	30655895700	25623684660	2.05894e+10	16459526430	1.305e+10	9985318260	7405985520	5038204950	2824237050
66	292	0	0	0	0	0	0	0	0	0	0	0	0	0	0	0	0	0	0	0
66	293	0	0	0	0	0	0	0	0	0	0	0	0	0	0	0	0	0	0	0
66	294	93900000000	357582832332	153596628276	103993816182	72382456302	55806302448	44151516141	36504417516	29523620145	24368468829	20415522030	17064283614	1.37117e+10	10961344197	8.69077e+09	6649797054	4932071208	3355230105	1880821695
66	295	0	0	0	0	0	0	0	0	0	0	0	0	0	0	0	0	0	0	0
66	296	241000000000	917757855080	394214988440	266906386580	1.85774e+11	143230233120	113317522790	9.36908e+10	75774147550	62543141510	52397665700	43796510660	3.51918e+10	28132949430	2.23054e+10	17067104260	12658457520	8611399950	4827242050
66	297	122000000000	464591113360	199561114480	135114436360	9.40432e+10	72506591040	57364057180	4.74285e+10	38358697100	31660843420	26524959400	22170847720	1.7815e+10	14241576060	1.12915e+10	8639778920	6408015840	4359297900	2443666100
66	298	256000000000	974879713280	418751191040	283518817280	1.97337e+11	152144977920	120370480640	9.95222e+10	80490380800	66435868160	55658931200	46522434560	3.73822e+10	29883962880	2.36937e+10	18129372160	13446328320	9147379200	5127692800
66	299	213000000000	811130386440	348414076920	235896515940	164190236340	126589376160	100152001470	8.28055e+10	66970512150	55276718430	46309970100	38708119380	3.11032e+10	24864390990	1.97139e+10	15084204180	11187765360	7610905350	4266400650
66	300	268000000000	1020577199840	438380153120	296808761840	2.06587e+11	159276773760	126012846920	1.04187e+11	84263367400	69550049480	58267943600	48703173680	3.91345e+10	31284773640	2.48043e+10	18979186480	14076624960	9576162600	5368053400
66	301	658000000000	2505745513040	1076321420720	728731960040	5.07217e+11	391060138560	309389751020	2.55803e+11	206885431900	170760942380	143060846600	119577195080	9.60839e+10	76811123340	6.09002e+10	46598151880	34561265760	23511623100	13179772900
66	302	610000000000	2.34738e+12	1065819529300	7.42762e+11	534465828900	420953002900	3.39668e+11	285137637500	234140368700	1.9569e+11	165595864300	139725770400	113496935500	9.15496e+10	73057546700	5.62343e+10	41910312300	2.86215e+10	1.60878e+10
66	303	1140000000000	4.3869e+12	1991859448200	1.38811e+12	998837778600	786699054600	6.34789e+11	532880175000	437573803800	3.65715e+11	309474238200	261126849600	212109027000	171092716200	136533775800	1.05094e+11	78324190200	5.34894e+10	3.00658e+10
66	304	1450000000000	5.57983e+12	2533505438500	1.76558e+12	1270451560500	1000625990500	8.07407e+11	677786187500	556563171500	4.65164e+11	393629513500	332135028000	269787797500	2.17618e+11	173661381500	1.33672e+11	99622873500	6.80348e+10	38241604000
66	305	1880000000000	7.23453e+12	3284820844400	2.28917e+12	1647206161200	1297363353200	1.04685e+12	878784850000	721612939600	6.03109e+11	510361024400	430630243200	349793834000	282152900400	225160963600	1.73312e+11	129166208400	8.82107e+10	4.95822e+10
66	306	2730000000000	1.05055e+13	4769979204900	3.32416e+12	2391953627700	1883937209700	1.52015e+12	1276107787500	1047874109100	8.75791e+11	741109359900	625330087200	507945301500	4.09722e+11	326962463100	2.51671e+11	187565823900	1.28093e+11	71999709600
66	307	4330000000000	1.66625e+13	7565571412900	5.27239e+12	3793831211700	2988076233700	2.41109e+12	2024009787500	1662012781100	1.38907e+12	1175459167900	991823911200	805642181500	649852158900	518588815100	3.99171e+11	297494511900	2.03166e+11	1.14197e+11
66	308	6370000000000	2.45128e+13	11129951478100	7.75638e+12	5581225131300	4395853489300	3.54702e+12	2977584837500	2445039587900	2.04351e+12	1729255173100	1459103536800	1185205703500	9.56018e+11	762912413900	5.87233e+11	437653589100	2.98884e+11	1.67999e+11
66	309	15700000000000	60736904291000	28249431702000	19986790015000	14579665113000	11626807700000	9488695664000	8034934539000	6648394691000	5591468179000	4755386502000	4.03144e+12	3288842594000	2661702640000	2.13083e+12	1644935943000	1228830993000	840777704000	473215113000
66	310	21700000000000	83948460071000	39045392862000	27625053715000	20151511653000	16070173700000	1.31149e+13	11105610159000	9189182471000	7728334999000	6572731662000	5572123179000	4545725114000	3678913840000	2.94516e+12	2273573883000	1698447933000	1162094024000	654061653000
66	311	25300000000000	97875393539000	45522969558000	32208011935000	23494619577000	18736193300000	1.52907e+13	12948015531000	10713655139000	9010455091000	7663138758000	6.49653e+12	5299854626000	4289240560000	3.43376e+12	2650756647000	1980218097000	1354883816000	762569577000
66	312	28800000000000	111415467744000	51820613568000	36663665760000	26744863392000	21328156800000	1.7406e+13	14739242976000	12195781344000	10256960736000	8723256768000	7.39526e+12	6033036096000	4882613760000	3.90878e+12	3017462112000	2254161312000	1542318336000	868063392000
66	313	32400000000000	1.25342e+14	58298190264000	41246623980000	30087971316000	23994176400000	19581766848000	16581648348000	13720254012000	11539080828000	9813663864000	8.31967e+12	6787165608000	5492940480000	4.39738e+12	3394644876000	2535931476000	1735108128000	976571316000
66	314	35600000000000	1.37722e+14	64056036216000	45320364620000	33059622804000	26363971600000	2.15158e+13	18219342012000	15075340828000	12678743132000	10782914616000	9141363372000	7457502952000	6035453120000	4831687892000	3729918444000	2786393844000	1906476832000	1073022804000
66	315	38800000000000	1.51338e+14	73477947752000	5.324e+13	39778607004000	3.22314e+13	2.6687e+13	22848800856000	19116048796000	16222591952000	1.39054e+13	11875765872000	9764288884000	7.95383e+12	6396397280000	4958338912000	3.71649e+12	2549643448000	1437697916000
66	316	45300000000000	1.76692e+14	85787397762000	6.21591e+13	46442548899000	37630990860000	3.11578e+13	26676563886000	22318479651000	18940294212000	1.62349e+13	13865262732000	11400058929000	9286297509000	7467958680000	5788988472000	4.33909e+12	2976774438000	1678549371000
66	317	50100000000000	1.95414e+14	94877453154000	6.87455e+13	51363613683000	41618380620000	3.44593e+13	29503219662000	2.46834e+13	20947212804000	1.79551e+13	15334429644000	12608012193000	10270276053000	8259265560000	6402391224000	4798865574000	3292194246000	1856408907000
66	318	54400000000000	2.12186e+14	103020627776000	7.46458e+13	55772067552000	45190417280000	37416832992000	32035432128000	2.68019e+13	22745077376000	1.94962e+13	16650558336000	13690136992000	1.11518e+13	8968144640000	6951897856000	5210744256000	3574757824000	2015741408000
66	319	60700000000000	2.36759e+14	114951325478000	8.32904e+13	62230965081000	50423866340000	41750032401000	35745417834000	2.99058e+13	25379158028000	2.1754e+13	18578839908000	15275575651000	1.24432e+13	10006734920000	7756988968000	5.81419e+12	3988746322000	2249182049000
66	320	65700000000000	2.56261e+14	124420133178000	9.01512e+13	67357074231000	5.45774e+13	45189079551000	38689850934000	3.23692e+13	27469698228000	2.3546e+13	20109222108000	16533860301000	1.34682e+13	10831012920000	8395950168000	6.29312e+12	4317308622000	2434452399000
66	321	65500000000000	2.55481e+14	124041380870000	8.98768e+13	67152029865000	5.44113e+13	45051517665000	38572073610000	3.22706e+13	27386076620000	2.34743e+13	20048006820000	16483528915000	1.34272e+13	10798041800000	8370391720000	6.27397e+12	4304166130000	2427041585000
66	322	66500000000000	2.59382e+14	125935142410000	9.1249e+13	68177251695000	5.5242e+13	45739327095000	39160960230000	3.27633e+13	27804184660000	2.38327e+13	20354083260000	16735185845000	1.36322e+13	10962897400000	8498183960000	6.36975e+12	4369878590000	2464095655000
66	323	75400000000000	2.94096e+14	142789620116000	1.03461e+14	77301725982000	6.26352e+13	5.18608e+13	44402051148000	37148197918000	31525346216000	2.70223e+13	23078163576000	18974932522000	1.54567e+13	12430112240000	9635534896000	7.22224e+12	4954719484000	2793876878000
66	324	85800000000000	3.34661e+14	162484740132000	1.17732e+14	87964033014000	71274591960000	5.9014e+13	50526471996000	42272087286000	35873669832000	3.07495e+13	26261358552000	21592164594000	1.75886e+13	14144610480000	10964574192000	8.21842e+12	5638129068000	3179239206000
66	325	101000000000000	3.93948e+14	191269915540000	1.38589e+14	103547404830000	83901326200000	6.94688e+13	59477548620000	4.97608e+13	42228912040000	3.6197e+13	30913720440000	25417349930000	20704548530000	16650415600000	12907016240000	9674359740000	6636958460000	3742461070000
66	326	110000000000000	4.29052e+14	208313769400000	1.50938e+14	112774401300000	91377682000000	75659037300000	64777528200000	5.4195e+13	45991884400000	3.94225e+13	33668408400000	27682262300000	2.25495e+13	18134116000000	14057146400000	10536431400000	7228370600000	4075947700000
66	327	109000000000000	4.25152e+14	206420007860000	1.49566e+14	111749179470000	90546975800000	74971227870000	64188641580000	5.37023e+13	45573776360000	3.90641e+13	33362331960000	27430605370000	2.23445e+13	17969260400000	13929354160000	10440645660000	7162658140000	4038893630000
66	328	118000000000000	4.60256e+14	223463861720000	1.61915e+14	120976175940000	98023331600000	81161512740000	69488621160000	5.81364e+13	49336748720000	4.22896e+13	36117019920000	29695517740000	2.41895e+13	19452960800000	15079484320000	11302717320000	7754070280000	4372380260000
66	329	128000000000000	4.99261e+14	242401477120000	1.75637e+14	131228394240000	1.0633e+14	88039607040000	75377487360000	6.30633e+13	53517829120000	4.58734e+13	39177784320000	32212087040000	2.62394e+13	21101516800000	16357406720000	1.22606e+13	8411194880000	4742920960000
66	330	124000000000000	4.83659e+14	234826430960000	1.70148e+14	127127506920000	103007568800000	85288369320000	73021940880000	6.10925e+13	51845396960000	4.44399e+13	37953478560000	31205459320000	2.54194e+13	20442094400000	15846237760000	1.18774e+13	8148345040000	4594704680000
66	331	123000000000000	4.79759e+14	232932669420000	1.68776e+14	126102285090000	102176862600000	84600559890000	72433054260000	6.05998e+13	51427288920000	4.40815e+13	37647402120000	30953802390000	2.52145e+13	20277238800000	15718445520000	1.17816e+13	8082632580000	4557650610000
66	332	125000000000000	4.87559e+14	236720192500000	1.71521e+14	128152728750000	103838275000000	85976178750000	73610827500000	6.15852e+13	52263505000000	4.47983e+13	38259555000000	31457116250000	2.56244e+13	20606950000000	15974030000000	1.19732e+13	8214057500000	4631758750000
66	333	125000000000000	4.87559e+14	236720192500000	1.71521e+14	128152728750000	103838275000000	85976178750000	73610827500000	6.15852e+13	52263505000000	4.47983e+13	38259555000000	31457116250000	2.56244e+13	20606950000000	15974030000000	1.19732e+13	8214057500000	4631758750000
66	334	129000000000000	5.03161e+14	244295238660000	1.77009e+14	132253616070000	1.07161e+14	88727416470000	75966373980000	6.35559e+13	53935937160000	4.62318e+13	39483860760000	32463743970000	2.64444e+13	21266372400000	16485198960000	1.23564e+13	8476907340000	4779975030000
66	335	125000000000000	498108616250000	2.65762e+14	204651575000000	162192042500000	1.37031e+14	1.17765e+14	103709342500000	89232787500000	77467971250000	6.75405e+13	58593928750000	49009840000000	40476082500000	3.2903e+13	25756595000000	19458111250000	13432578750000	7607471250000
66	336	118000000000000	470214533740000	2.50879e+14	193191086800000	153109288120000	1.29358e+14	1.1117e+14	97901619320000	84235751400000	73129764860000	6.37582e+13	55312668740000	46265288960000	38209421880000	3.10605e+13	24314225680000	18368457020000	12680354340000	7181452860000
66	337	124000000000000	494123747320000	2.63636e+14	203014362400000	160894506160000	1.35935e+14	1.16823e+14	102879667760000	88518925200000	76848227480000	6.70002e+13	58125177320000	48617761280000	40152273840000	3.26398e+13	25550542240000	19302446360000	13325118120000	7546611480000
66	338	135000000000000	5.37957e+14	287023074750000	221023701000000	175167405900000	1.47994e+14	1.27186e+14	112006089900000	96371410500000	83665408950000	7.29438e+13	6.32814e+13	52930627200000	4.37142e+13	3.55353e+13	27817122600000	21014760150000	14507185050000	8216068950000
66	339	143000000000000	569836256990000	304031849550000	234121401800000	185547696620000	1.56764e+14	1.34723e+14	118643487820000	102082308900000	88623359110000	7.72664e+13	6.70315e+13	56067256960000	4.63046e+13	3.76411e+13	29465544680000	22260079270000	15366870090000	8702947110000
66	340	143000000000000	569836256990000	304031849550000	234121401800000	185547696620000	1.56764e+14	1.34723e+14	118643487820000	102082308900000	88623359110000	7.72664e+13	6.70315e+13	56067256960000	4.63046e+13	3.76411e+13	29465544680000	22260079270000	15366870090000	8702947110000
66	341	144000000000000	573821125920000	306157946400000	235758614400000	186845232960000	1.5786e+14	1.35665e+14	119473162560000	102796171200000	89243102880000	7.78067e+13	6.75002e+13	56459335680000	4.66284e+13	3.79043e+13	29671597440000	22415744160000	15474330720000	8763806880000
66	342	146000000000000	581790863780000	310410140100000	239033039600000	189440305640000	1.60053e+14	1.37549e+14	121132512040000	104223895800000	90482590420000	7.88873e+13	6.84377e+13	57243493120000	4.72761e+13	3.84307e+13	30083702960000	22727073940000	15689251980000	8885526420000
66	343	135000000000000	5.37957e+14	287023074750000	221023701000000	175167405900000	1.47994e+14	1.27186e+14	112006089900000	96371410500000	83665408950000	7.29438e+13	6.32814e+13	52930627200000	4.37142e+13	3.55353e+13	27817122600000	21014760150000	14507185050000	8216068950000
66	344	133000000000000	5.29988e+14	282770881050000	217749275800000	172572333220000	1.45801e+14	1.25302e+14	110346740420000	94943685900000	82425921410000	7.18631e+13	6.23439e+13	52146469760000	4.30666e+13	3.50088e+13	27405017080000	20703430370000	14292263790000	8094349410000
66	345	140000000000000	5.57882e+14	297653559000000	229209764000000	181655087600000	1.53475e+14	1.31897e+14	116154463600000	99940722000000	86764127800000	7.56454e+13	6.56252e+13	54891020800000	4.53332e+13	3.68514e+13	28847386400000	21793084600000	15044488200000	8520367800000
66	346	141000000000000	5.61867e+14	299779655850000	230846976600000	182952623940000	1.54571e+14	1.32839e+14	116984138340000	100654584300000	87383871570000	7.61857e+13	6.6094e+13	55283099520000	4.5657e+13	3.71146e+13	29053439160000	21948749490000	15151948830000	8581227570000
66	347	141000000000000	5.61867e+14	299779655850000	230846976600000	182952623940000	1.54571e+14	1.32839e+14	116984138340000	100654584300000	87383871570000	7.61857e+13	6.6094e+13	55283099520000	4.5657e+13	3.71146e+13	29053439160000	21948749490000	15151948830000	8581227570000
66	348	141000000000000	5.61867e+14	299779655850000	230846976600000	182952623940000	1.54571e+14	1.32839e+14	116984138340000	100654584300000	87383871570000	7.61857e+13	6.6094e+13	55283099520000	4.5657e+13	3.71146e+13	29053439160000	21948749490000	15151948830000	8581227570000
66	349	142000000000000	565851388060000	301905752700000	232484189200000	184250160280000	1.55668e+14	1.33781e+14	117813813080000	101368446600000	88003615340000	7.6726e+13	6.65627e+13	55675178240000	4.59808e+13	3.73778e+13	29259491920000	22104414380000	15259409460000	8642087340000
66	350	0	0	0	0	0	0	0	0	0	0	0	0	0	0	0	0	0	0	0
65	280	0	0	0	0	0	0	0	0	0	0	0	0	0	0	0	0	0	0	0
65	281	0	0	0	0	0	0	0	0	0	0	0	0	0	0	0	0	0	0	0
65	282	0	0	0	0	0	0	0	0	0	0	0	0	0	0	0	0	0	0	0
65	283	0	0	0	0	0	0	0	0	0	0	0	0	0	0	0	0	0	0	0
65	284	0	0	0	0	0	0	0	0	0	0	0	0	0	0	0	0	0	0	0
65	285	0	0	0	0	0	0	0	0	0	0	0	0	0	0	0	0	0	0	0
65	286	0	0	0	0	0	0	0	0	0	0	0	0	0	0	0	0	0	0	0
65	287	0	0	0	0	0	0	0	0	0	0	0	0	0	0	0	0	0	0	0
65	288	0	0	0	0	0	0	0	0	0	0	0	0	0	0	0	0	0	0	0
65	289	0	0	0	0	0	0	0	0	0	0	0	0	0	0	0	0	0	0	0
65	290	0	0	0	0	0	0	0	0	0	0	0	0	0	0	0	0	0	0	0
65	291	189000000000	661754227680	323181419400	218031501870	151726555890	1.16979e+11	92548884960	76519299780	6.18864e+10	5.10803e+10	42794311770	35769561660	28741938750	22976790480	18217297980	1.39391e+10	10338436080	7.03312e+09	3942511650
65	292	0	0	0	0	0	0	0	0	0	0	0	0	0	0	0	0	0	0	0
65	293	0	0	0	0	0	0	0	0	0	0	0	0	0	0	0	0	0	0	0
65	294	74800000000	261900614976	1.27905e+11	86289716084	6.00484e+10	4.62966e+10	36627812672	30283828696	2.44926e+10	20215924476	16936584764	1.41564e+10	11375116500	9093459936	7209808936	5.51663e+09	4091613856	2.78348e+09	1560316780
65	295	0	0	0	0	0	0	0	0	0	0	0	0	0	0	0	0	0	0	0
65	296	229000000000	801808032480	391579603400	264175735070	183837996290	141736795130	112135950560	92713860580	74984043960	6.1891e+10	51851308970	43339839260	34824888750	27839603280	22072810780	1.68891e+10	12526464880	8.52161e+09	4776905650
65	297	100000000000	350134512000	170995460000	115360583000	80278601000	6.18938e+10	48967664000	40486402000	3.27441e+10	2.70266e+10	22642493000	18925694000	15207375000	12157032000	9638782000	7.37517e+09	5470072000	3.72123e+09	2085985000
65	298	238000000000	833320138560	406969194800	274558187540	191063070380	147307236860	116543040320	96357636760	7.7931e+10	6.43234e+10	53889133340	45043151720	36193552500	28933736160	22940301160	17552909360	13018771360	8.85652e+09	4964644300
65	299	227000000000	794805342240	388159694200	261868523410	182232424270	140498919190	111156597280	91904132540	74329161480	6.13505e+10	51398459110	42961325380	34520741250	27596462640	21880035140	1.67416e+10	12417063440	8.44719e+09	4735185950
65	300	276000000000	966371253120	471947469600	318395209080	2.21569e+11	170826879720	135150752640	111742469520	9.03738e+10	74593518120	62493280680	5.22349e+10	41972355000	33553408320	26603038320	2.03555e+10	15097398720	1.02706e+10	5757318600
65	301	693000000000	2426432168160	1184998537800	799448840190	556330704930	4.28924e+11	339345911520	280570765860	2.26917e+11	187294594410	156912476490	1.31155e+11	105387108750	84248231760	66796759260	5.11099e+10	37907598960	2.57881e+10	14455876050
65	302	688000000000	2436992381920	1256200183680	872389235680	627625000320	494323631200	3.98871e+11	334836039520	2.7495e+11	229797448960	194458583520	164079448160	133279016000	1.07506e+11	8.57912e+10	66035684800	49215123680	33610169120	18891895200
65	303	1180000000000	4179725306200	2154529384800	1496248979800	1076449855200	847822507000	6.8411e+11	574282742200	4.71571e+11	394129345600	333519082200	281415332600	228589010000	1.84386e+11	147141870000	113258878000	84409659800	57645348200	3.24018e+10
65	304	1570000000000	5561159941300	2866619605200	1990771947700	1432225654800	1128035030500	9.10214e+11	764088055300	6.2743e+11	524392434400	443749965300	374425484900	304139615000	2.45327e+11	1.95774e+11	150691897000	112307767700	76697624300	43110865500
65	305	2060000000000	7296808585400	3761297061600	2612095676600	1879226018400	1480096919000	1.19429e+12	1002561397400	8.23252e+11	688056315200	582245177400	4.91284e+11	399062170000	3.21894e+11	2.56875e+11	197723126000	147359236600	100635099400	5.65658e+10
65	306	3120000000000	11051477080800	5696721763200	3956183743200	2846206396800	2241700188000	1.80883e+12	1518442504800	1.24687e+12	1042104710400	881847064800	744081218400	604404840000	4.87529e+11	3.89053e+11	299464152000	223184863200	152418208800	85672548000
65	307	4930000000000	17462750643700	9001550734800	6251277517300	4497371005200	3542173694500	2.85819e+12	2399333829700	1.97021e+12	1646659045600	1393431419700	1175743720100	955037135000	7.70358e+11	614753745000	473191753000	352660697300	240840310700	1.35374e+11
65	308	8100000000000	28691334729000	14789566116000	10270861641000	7389189684000	5819798565000	4.69601e+12	3942110349000	3.23706e+12	2705464152000	2289410649000	1.93175e+12	1569127950000	1.2657e+12	1.01004e+12	777455010000	579422241000	395701119000	222419115000
65	309	17900000000000	6.37773e+13	33649463033000	23726780613000	17304790453000	13799931789000	11262190256000	9536712417000	7.89102e+12	6636547436000	5644196854000	4784945302000	3903546975000	3159191048000	2.52909e+12	1952384504000	1458507036000	997923926000	561662083000
65	310	22500000000000	80166952125000	42296811075000	29824165575000	21751831575000	17346282975000	1.41564e+13	11987487675000	9918879750000	8.34203e+12	7094660850000	6014596050000	4906693125000	3971050200000	3.17903e+12	2454114600000	1833318900000	1254373650000	705999825000
65	311	26500000000000	94418854725000	49816244155000	35126239455000	25618823855000	20430066615000	1.66731e+13	14118596595000	1.16822e+13	9825056260000	8355933890000	7083857570000	5778994125000	4677014680000	3.74419e+12	2890401640000	2159242260000	1477373410000	831510905000
65	312	30100000000000	1.07246e+14	56583733927000	39898105947000	29099116907000	23205471891000	18938096464000	16036594623000	1.32693e+13	11159780884000	9491079626000	8046192938000	6564065025000	5312382712000	4.25283e+12	3283059976000	2452573284000	1678073194000	944470877000
65	313	33900000000000	1.20785e+14	63727195353000	44935076133000	32772759573000	26135066349000	21328952496000	18061148097000	1.49444e+13	12568656876000	10689289014000	9061991382000	7392750975000	5983048968000	4789735407000	3697532664000	2762200476000	1889922966000	1063706403000
65	314	37200000000000	1.32543e+14	69930727644000	49309287084000	35963028204000	28679187852000	23405222208000	19819312956000	1.63992e+13	13792154448000	11729839272000	9944132136000	8112399300000	6565469664000	5.25599e+12	4057469472000	3031087248000	2073897768000	1167253044000
65	315	40500000000000	145619032230000	80112316950000	57853026900000	4.32176e+13	35017740180000	2.8994e+13	24824027475000	20768587515000	17624997765000	15107471190000	12902398875000	10608389775000	8641416555000	6949351260000	5.38698e+12	4.03777e+12	2770054200000	1561983750000
65	316	47300000000000	170068647518000	93563273870000	67566621540000	5.04739e+13	40897261988000	3.38622e+13	28992012335000	24255658999000	20584256649000	17644034254000	15068727575000	12389551515000	10092321063000	8116155916000	6.29146e+12	4715715400000	3235149720000	1824242750000
65	317	52200000000000	187686752652000	103255875180000	74566123560000	5.57027e+13	45133976232000	3.73701e+13	31995413190000	26768401686000	22716663786000	19471851756000	16629758550000	13673035710000	11137825782000	8956941624000	6.94321e+12	5204235600000	3570292080000	2.01322e+12
65	318	56600000000000	203507091956000	111959435540000	80851390680000	6.0398e+13	48938372696000	4.05201e+13	34692344570000	29024742058000	24631478358000	21113157268000	18031500650000	14825552130000	12076646346000	9711932872000	7.52847e+12	5.64291e+12	3871236240000	2.18292e+12
65	319	63100000000000	226878047746000	124816967890000	90136444380000	6.73341e+13	54558503836000	4.51734e+13	38676447745000	32357972153000	2.74602e+13	23537813138000	20102256025000	1.65281e+13	13463540361000	10827260852000	8.39304e+12	6.29094e+12	4.31581e+12	2433609250000
65	320	68200000000000	245215259212000	134905185580000	97421640360000	72776340032000	58968145192000	4.88245e+13	41802436390000	34973275766000	2.96796e+13	25440235436000	21727002550000	17864004510000	14551718742000	11702364344000	9.0714e+12	6.7994e+12	4664634480000	2630303500000
65	321	67800000000000	243777046548000	134113952820000	96850252440000	72349499328000	58622290968000	4.85382e+13	41557260810000	34768153914000	2.95056e+13	25291025844000	21599571450000	17759230290000	14466371418000	11633728776000	9.0182e+12	6.75952e+12	4637275920000	2614876500000
65	322	68800000000000	247372578208000	136092034720000	98278722240000	73416601088000	59486926528000	4.92541e+13	42170199760000	35280958544000	2.99407e+13	25664049824000	21918149200000	18021165840000	14679739728000	11805317696000	9.15121e+12	6.85922e+12	4705672320000	2653444000000
65	323	77800000000000	2.79732e+14	153894771820000	111134950440000	8.30205e+13	67268646568000	5.56972e+13	47686650310000	39896200214000	3.38574e+13	29021265644000	24785348950000	20378585790000	16600054518000	13349617976000	1.03483e+13	7.7565e+12	5321239920000	3000551500000
65	324	88600000000000	318564105076000	175258056340000	126562424280000	9.45452e+13	76606710616000	6.34289e+13	54306390970000	45434490218000	38557402518000	3.30499e+13	28225988650000	23207489730000	18904432266000	15202778312000	1.17848e+13	8833242800000	6059921040000	3417080500000
65	325	104000000000000	373935292640000	205720517600000	148560859200000	1.10979e+14	89922098240000	7.44538e+13	63745650800000	53331681520000	45259253520000	38794493920000	33132086000000	27241297200000	22190304240000	17845247680000	1.38332e+13	10368592000000	7113225600000	4.01102e+12
65	326	114000000000000	409890609240000	225501336600000	162845557200000	1.2165e+14	98568453840000	8.16128e+13	69875040300000	58459727820000	49611104820000	42524733720000	36317863500000	29860652700000	24323987340000	19561136880000	1.51633e+13	1.13656e+13	7797189600000	4.39669e+12
65	327	113000000000000	406295077580000	223523254700000	161417087400000	1.20582e+14	97703818280000	8.08969e+13	69262101350000	57946923190000	49175919690000	42151709740000	35999285750000	29598717150000	24110619030000	19389547960000	1.50303e+13	1.12659e+13	7728793200000	4.35813e+12
65	328	121000000000000	435059330860000	239347909900000	172844845800000	1.29119e+14	104620902760000	8.66242e+13	74165612950000	62049360230000	52657400730000	45135901580000	38547907750000	3.16942e+13	25817565510000	20762259320000	1.60944e+13	1.20635e+13	8275964400000	4666667500000
65	329	131000000000000	471014647460000	259128728900000	187129543800000	1.3979e+14	113267258360000	9.37832e+13	80295002450000	67177406530000	5.70093e+13	48866141380000	41733685250000	3.43136e+13	27951248610000	22478148520000	1.74245e+13	1.30604e+13	8959928400000	5052342500000
65	330	127000000000000	456632520820000	251216401300000	181415664600000	1.35522e+14	109808716120000	9.09196e+13	77843246650000	65126188010000	5.52685e+13	47374045460000	40459374250000	3.32658e+13	27097775370000	21791792840000	1.68925e+13	1.26616e+13	8.68634e+12	4898072500000
65	331	126000000000000	453036989160000	249238319400000	179987194800000	1.34455e+14	108944080560000	9.02037e+13	77230307700000	64613383380000	5.48333e+13	47001021480000	40140796500000	3.30039e+13	26884407060000	21620203920000	1.67595e+13	1.25619e+13	8.61795e+12	4859505000000
65	332	128000000000000	460228052480000	253194483200000	182844134400000	1.36589e+14	110673351680000	9.16355e+13	78456185600000	65638992640000	5.57037e+13	47747069440000	40777952000000	3.35278e+13	27311143680000	21963381760000	1.70255e+13	1.27613e+13	8.75474e+12	4936640000000
65	333	128000000000000	460228052480000	253194483200000	182844134400000	1.36589e+14	110673351680000	9.16355e+13	78456185600000	65638992640000	5.57037e+13	47747069440000	40777952000000	3.35278e+13	27311143680000	21963381760000	1.70255e+13	1.27613e+13	8.75474e+12	4936640000000
65	334	132000000000000	474610179120000	261106810800000	188558013600000	140857432320000	114131893920000	9.44991e+13	80907941400000	67690211160000	5.74444e+13	49239165360000	42052263000000	3.45755e+13	28164616920000	22649737440000	1.75576e+13	1.31601e+13	9028324800000	5090910000000
65	335	128000000000000	471272236800000	284034400000000	218060400640000	172792224000000	145986455040000	125460960000000	1.10487e+14	9.50642e+13	8.25306e+13	71954333440000	6.24231e+13	5.22127e+13	4.31212e+13	35053256960000	27439804160000	2.07297e+13	1.43104e+13	8.10462e+12
65	336	121000000000000	445499536350000	268501268750000	206135222480000	163342649250000	1.38003e+14	118599813750000	1.04445e+14	8.98654e+13	7.80172e+13	68019330830000	5.90093e+13	4.93573e+13	4.0763e+13	33136281970000	25939189870000	1.95961e+13	1.35278e+13	7.6614e+12
65	337	127000000000000	467590422450000	281815381250000	216356803760000	171442284750000	144845935860000	124480796250000	1.09624e+14	9.43215e+13	8.18858e+13	71392190210000	6.19354e+13	5.18048e+13	4.27843e+13	34779403390000	27225430690000	2.05678e+13	1.41986e+13	8.04131e+12
65	338	138000000000000	508090380300000	306224587500000	235096369440000	186291616500000	157391646840000	135262597500000	1.19119e+14	1.02491e+14	8.89783e+13	77575765740000	6.72999e+13	5.62918e+13	4.64901e+13	37791792660000	29583538860000	2.23492e+13	1.54284e+13	8.7378e+12
65	339	146000000000000	537544895100000	323976737500000	248725144480000	197091130500000	166515800280000	143103907500000	1.26024e+14	1.08433e+14	9.41364e+13	82072911580000	71201323800000	5.95551e+13	4.91851e+13	39982621220000	31298526620000	2.36448e+13	1.63228e+13	9.24434e+12
65	340	146000000000000	537544895100000	323976737500000	248725144480000	197091130500000	166515800280000	143103907500000	1.26024e+14	1.08433e+14	9.41364e+13	82072911580000	71201323800000	5.95551e+13	4.91851e+13	39982621220000	31298526620000	2.36448e+13	1.63228e+13	9.24434e+12
65	341	146000000000000	537544895100000	323976737500000	248725144480000	197091130500000	166515800280000	143103907500000	1.26024e+14	1.08433e+14	9.41364e+13	82072911580000	71201323800000	5.95551e+13	4.91851e+13	39982621220000	31298526620000	2.36448e+13	1.63228e+13	9.24434e+12
65	342	149000000000000	548590338150000	330633793750000	253835935120000	201140948250000	169937357820000	146044398750000	1.28614e+14	1.10661e+14	9.60707e+13	83759341270000	72664364700000	6.07788e+13	5.01958e+13	40804181930000	31941647030000	2.41307e+13	1.66582e+13	9.43429e+12
65	343	137000000000000	504408565950000	304005568750000	233392772560000	184941677250000	156251127660000	134282433750000	1.18255e+14	1.01748e+14	8.83335e+13	77013622510000	6.68122e+13	5.58839e+13	4.61532e+13	37517939090000	29369165390000	2.21873e+13	1.53166e+13	8.67448e+12
65	344	135000000000000	497044937250000	299567531250000	229985578800000	182241798750000	153970089300000	132322106250000	1.16529e+14	1.00263e+14	8.70439e+13	75889336050000	6.58368e+13	5.5068e+13	4.54794e+13	36970231950000	28940418450000	2.18634e+13	1.5093e+13	8.54785e+12
65	345	143000000000000	526499452050000	317319681250000	243614353840000	193041312750000	163094242740000	140163416250000	1.23434e+14	1.06205e+14	9.22021e+13	80386481890000	6.97383e+13	5.83313e+13	4.81745e+13	39161060510000	30655406210000	2.3159e+13	1.59874e+13	9.05439e+12
65	346	143000000000000	526499452050000	317319681250000	243614353840000	193041312750000	163094242740000	140163416250000	1.23434e+14	1.06205e+14	9.22021e+13	80386481890000	6.97383e+13	5.83313e+13	4.81745e+13	39161060510000	30655406210000	2.3159e+13	1.59874e+13	9.05439e+12
65	347	144000000000000	530181266400000	319538700000000	245317950720000	194391252000000	164234761920000	141143580000000	1.24298e+14	1.06947e+14	9.28469e+13	80948625120000	7.0226e+13	5.87392e+13	4.85114e+13	39434914080000	30869779680000	2.33209e+13	1.60992e+13	9.1177e+12
65	348	144000000000000	530181266400000	319538700000000	245317950720000	194391252000000	164234761920000	141143580000000	1.24298e+14	1.06947e+14	9.28469e+13	80948625120000	7.0226e+13	5.87392e+13	4.85114e+13	39434914080000	30869779680000	2.33209e+13	1.60992e+13	9.1177e+12
65	349	144000000000000	530181266400000	319538700000000	245317950720000	194391252000000	164234761920000	141143580000000	1.24298e+14	1.06947e+14	9.28469e+13	80948625120000	7.0226e+13	5.87392e+13	4.85114e+13	39434914080000	30869779680000	2.33209e+13	1.60992e+13	9.1177e+12
65	350	0	0	0	0	0	0	0	0	0	0	0	0	0	0	0	0	0	0	0
64	280	0	0	0	0	0	0	0	0	0	0	0	0	0	0	0	0	0	0	0
64	281	0	0	0	0	0	0	0	0	0	0	0	0	0	0	0	0	0	0	0
64	282	0	0	0	0	0	0	0	0	0	0	0	0	0	0	0	0	0	0	0
64	283	0	0	0	0	0	0	0	0	0	0	0	0	0	0	0	0	0	0	0
64	284	0	0	0	0	0	0	0	0	0	0	0	0	0	0	0	0	0	0	0
64	285	0	0	0	0	0	0	0	0	0	0	0	0	0	0	0	0	0	0	0
64	286	0	0	0	0	0	0	0	0	0	0	0	0	0	0	0	0	0	0	0
64	287	0	0	0	0	0	0	0	0	0	0	0	0	0	0	0	0	0	0	0
64	288	0	0	0	0	0	0	0	0	0	0	0	0	0	0	0	0	0	0	0
64	289	0	0	0	0	0	0	0	0	0	0	0	0	0	0	0	0	0	0	0
64	290	0	0	0	0	0	0	0	0	0	0	0	0	0	0	0	0	0	0	0
64	291	139000000000	486686971680	237683689400	160351210370	1.11587e+11	86032377830	68065052960	56276098780	4.55143e+10	37567025430	31473065270	2.63067e+10	21138251250	16898274480	13397906980	1.02515e+10	7603400080	5.17251e+09	2899519150
64	292	0	0	0	0	0	0	0	0	0	0	0	0	0	0	0	0	0	0	0
64	293	0	0	0	0	0	0	0	0	0	0	0	0	0	0	0	0	0	0	0
64	294	112000000000	392150653440	191514915200	129203852960	89912033120	69321052640	54843783680	45344770240	36673418880	3.02698e+10	25359592160	21196777280	17032260000	13615875840	10795435840	8.26019e+09	6126480640	4.16777e+09	2336303200
64	295	0	0	0	0	0	0	0	0	0	0	0	0	0	0	0	0	0	0	0
64	296	208000000000	728279784960	355670556800	239950012640	166979490080	1.28739e+11	101852741120	84211716160	6.81078e+10	5.62154e+10	47096385440	39365443520	31631340000	25286626560	20048666560	1.53404e+10	11377749760	7.74015e+09	4338848800
64	297	37300000000	130600172976	63781306580	43029497459	2.99439e+10	2.30864e+10	18264938672	15101427946	1.22136e+10	10080935601	8445649889	7.05928e+09	5672350875	4534572936	3595265686	2.75094e+09	2040336856	1.38802e+09	778072405
64	298	271000000000	948864527520	463397696600	312627179930	2.17555e+11	167732189870	132702369440	109718149420	8.87366e+10	73242186270	61361156030	5.12886e+10	41211986250	32945556720	26121099220	1.99867e+10	14823895120	1.00845e+10	5653019350
64	299	185000000000	647748847200	316341601000	213417078550	148515411850	1.14504e+11	90590178400	74899843700	6.05766e+10	4.99993e+10	41888612050	35012533900	28133643750	22490509200	17831746700	1.36441e+10	10119633200	6.88427e+09	3859072250
64	300	354000000000	1239476172480	605323928400	408376463820	284186247540	2.19104e+11	173345530560	143321863080	1.15914e+11	9.56743e+10	80154425220	6.6997e+10	53834107500	43035893280	34121288280	2.61081e+10	19364054880	1.31731e+10	7384386900
64	301	796000000000	2787070715520	1361123861600	918270240680	639017663960	4.92675e+11	389782605440	322271759920	2.60643e+11	2.15132e+11	180234244280	150648524240	121050705000	96769974720	76724704720	5.87064e+10	43541773120	2.9621e+10	16604440600
64	302	772000000000	2734532149480	1409573461920	978901874920	704253634080	554677097800	4.4757e+11	375717183880	3.0852e+11	257854114240	218200619880	184112404040	149551454000	1.20632e+11	9.62657e+10	74098181200	55223946920	37713736280	21198463800
64	303	1440000000000	5100681729600	2629256198400	1825930958400	1313633721600	1034630856000	8.34846e+11	700819617600	5.75477e+11	480971404800	407006337600	343422100800	278956080000	2.25013e+11	1.79563e+11	138214224000	103008398400	70346865600	39541176000
64	304	1960000000000	6942594576400	3578709825600	2485294915600	1788001454400	1408247554000	1136317996800	953893368400	7.83288e+11	654655523200	553980848400	4.67436e+11	379690220000	3.06268e+11	2.44405e+11	188124916000	140205875600	95749900400	53819934000
64	305	2630000000000	9315828436700	4802044306800	3334860014300	2399206033200	1889638299500	1.52475e+12	1279969162700	1.05104e+12	878440829600	743351852700	627222309100	509482285000	4.10962e+11	3.27952e+11	252432923000	188133394300	128480733700	72217564500
64	306	3960000000000	14026874756400	7230454545600	5021310135600	3612492734400	2845234854000	2295826156800	1927253948400	1.58256e+12	1322671363200	1119267428400	9.44411e+11	767129220000	6.18787e+11	4.93798e+11	380089116000	283273095600	193453880400	108738234000
64	307	8030000000000	28443384922700	14661755050800	10182101108300	7325332489200	5769504009500	4655425262400	3908042728700	3.20908e+12	2682083597600	2269625618700	1.91506e+12	1555567585000	1.25476e+12	1.00131e+12	770736263000	574414888300	392281479700	220496974500
64	308	13000000000000	46047821170000	23736340680000	16484098930000	11859193320000	9340417450000	7.5368e+12	6326843770000	5.19528e+12	4342102960000	3674362770000	3100338410000	2518353500000	2.03137e+12	1.62105e+12	1247767300000	929936930000	635075870000	356968950000
64	309	19300000000000	6.87654e+13	36281264611000	25582506471000	18658237751000	14879256063000	12143031952000	10282600539000	8.50819e+12	7155607012000	6085642418000	5159186834000	4208852325000	3406278616000	2.7269e+12	2105084968000	1572580212000	1075973842000	605590961000
64	310	24200000000000	86224010730000	45492570134000	32077546974000	23395303294000	18656891022000	1.5226e+13	12893208966000	10668306220000	8972315528000	7630701892000	6469032196000	5277421050000	4271085104000	3.41922e+12	2639536592000	1971836328000	1349148548000	759342034000
64	311	28700000000000	102257401155000	53951932349000	38042380089000	27745669609000	22126147617000	18057254768000	15290706501000	1.26521e+13	10640721308000	9049634062000	7671951406000	6258759675000	5065295144000	4.05503e+12	3130359512000	2338500108000	1600023278000	900541999000
64	312	32800000000000	1.16866e+14	61659351256000	43477005816000	31709336696000	25287025848000	20636862592000	17475093144000	1.44595e+13	12160824352000	10342438928000	8767944464000	7152868200000	5788908736000	4634316264000	3577553728000	2672571552000	1828598032000	1029190856000
64	313	37100000000000	1.32186e+14	69742741817000	49176735237000	35866353397000	28602093261000	23342304944000	19766035233000	1.63551e+13	13755078764000	11698307446000	9917400598000	8090591775000	6547820552000	5.24186e+12	4046562296000	3022939164000	2068322774000	1164115267000
64	314	40600000000000	144656811390000	76322245762000	53816049882000	39249971642000	31300403946000	2.55444e+13	21630755538000	17898067460000	15052727704000	12801921356000	10853004428000	8853855150000	7165539472000	5.73638e+12	4428313456000	3308122104000	2263447564000	1273937462000
64	315	44300000000000	159282052538000	87629028170000	63281212140000	4.72726e+13	38303355308000	3.17145e+13	27153195485000	22717245109000	19278701259000	1.6525e+13	14112994325000	11603744865000	9452216133000	7601389156000	5.89242e+12	4416621400000	3029960520000	1708540250000
64	316	51900000000000	186608093154000	102662450610000	74137582620000	5.53826e+13	44874585564000	3.71553e+13	31811531505000	26614560297000	22586108247000	19359944562000	16534185225000	13594455045000	11073815289000	8905464948000	6.90331e+12	5174326200000	3549773160000	2.00165e+12
64	317	57400000000000	206383517284000	113541901060000	81994166520000	6.12516e+13	49630081144000	4.10928e+13	35182695730000	29434985762000	24979626462000	21411576452000	18286362850000	15035100570000	12247340994000	9849204008000	7.63487e+12	5.72267e+12	3925953360000	2213774500000
64	318	62100000000000	223282516086000	122838885990000	88707974580000	6.6267e+13	53693868276000	4.44575e+13	38063508795000	31845167523000	27024996573000	23164789158000	19783678275000	1.62662e+13	13250172051000	10655671932000	8.26003e+12	6.19125e+12	4247416440000	2395041750000
64	319	69300000000000	249170344038000	137081075670000	98992957140000	73950151968000	59919244308000	4.9612e+13	42476669235000	35537360859000	3.01583e+13	25850561814000	22077438075000	18152133615000	14786423883000	11891112156000	9.21771e+12	6.90907e+12	4739870520000	2672727750000
64	320	74900000000000	269305321334000	148158334310000	106992388020000	79925921824000	64761203444000	5.36211e+13	45909127355000	38409066787000	3.25954e+13	27939496102000	23861473475000	19618972695000	15981286419000	12852010108000	9.96258e+12	7.46738e+12	5122890360000	2888705750000
64	321	74400000000000	267507555504000	147169293360000	106278153120000	79392370944000	64328885664000	5.32631e+13	45602657880000	38152664472000	3.23778e+13	27752984112000	23702184600000	19488004920000	15874602264000	12766215648000	9.89607e+12	7.41753e+12	5088692160000	2869422000000
64	322	75500000000000	271462640330000	149345183450000	107849469900000	80566182880000	65279984780000	5.40506e+13	46276890725000	38716749565000	3.28565e+13	28163310490000	24052620125000	19776134025000	16109307405000	12954963460000	1.00424e+13	7.5272e+12	5163928200000	2911846250000
64	323	85500000000000	307417956930000	169126002450000	122134167900000	9.12372e+13	73926340380000	6.12096e+13	52406280225000	43844795865000	37208328615000	31893550290000	27238397625000	22395489525000	18242990505000	14670852660000	1.13725e+13	8.52418e+12	5847892200000	3297521250000
64	324	97400000000000	350204783684000	192665177060000	139132958520000	1.03936e+14	84215503544000	6.97289e+13	59700253730000	49947170962000	42387031662000	36332535652000	31029472850000	25512522570000	20782073394000	16712760808000	1.29553e+13	9710585200000	6661809360000	3756474500000
64	325	114000000000000	409890609240000	225501336600000	162845557200000	1.2165e+14	98568453840000	8.16128e+13	69875040300000	58459727820000	49611104820000	42524733720000	36317863500000	29860652700000	24323987340000	19561136880000	1.51633e+13	1.13656e+13	7797189600000	4.39669e+12
64	326	125000000000000	449441457500000	247260237500000	178558725000000	1.33388e+14	108079445000000	8.94878e+13	76617368750000	64100578750000	54398141250000	46627997500000	39822218750000	3.27419e+13	26671038750000	21448615000000	1.66265e+13	1.24623e+13	8.54955e+12	4820937500000
64	327	124000000000000	445845925840000	245282155600000	177130255200000	1.32321e+14	107214809440000	8.87719e+13	76004429800000	63587774120000	53962956120000	46254973520000	39503641000000	3.248e+13	26457670440000	21277026080000	1.64935e+13	1.23626e+13	8481153600000	4782370000000
64	328	133000000000000	478205710780000	263084892700000	189986483400000	141924534080000	114996529480000	9.5215e+13	81520880350000	68203015790000	5.78796e+13	49612189340000	42370840750000	3.48374e+13	28377985230000	22821326360000	1.76906e+13	1.32598e+13	9096721200000	5129477500000
64	329	145000000000000	521352090700000	286821875500000	207128121000000	154729755200000	125372156200000	1.03806e+14	88876147750000	74356671350000	6.31018e+13	54088477100000	46193773750000	37980654750000	30938404950000	24880393400000	1.92867e+13	1.44562e+13	9917478000000	5592287500000
64	330	140000000000000	503374432400000	276931466000000	199985772000000	149394246400000	121048978400000	1.00226e+14	85811453000000	71792648200000	6.09259e+13	52223357200000	44600885000000	36670977000000	29871563400000	24022448800000	1.86216e+13	1.39577e+13	9575496000000	5399450000000
64	331	139000000000000	499778900740000	274953384100000	198557302200000	148327144640000	120184342840000	9.95104e+13	85198514050000	71279843570000	6.04907e+13	51850333220000	44282307250000	36409041450000	29658195090000	23850859880000	1.84886e+13	1.3858e+13	9507099600000	5360882500000
64	332	140000000000000	503374432400000	276931466000000	199985772000000	149394246400000	121048978400000	1.00226e+14	85811453000000	71792648200000	6.09259e+13	52223357200000	44600885000000	36670977000000	29871563400000	24022448800000	1.86216e+13	1.39577e+13	9575496000000	5399450000000
64	333	141000000000000	506969964060000	278909547900000	201414241800000	150461348160000	121913613960000	1.00942e+14	86424391950000	72305452830000	6.13611e+13	52596381180000	44919462750000	36932912550000	30084931710000	24194037720000	1.87547e+13	1.40574e+13	9643892400000	5438017500000
64	334	145000000000000	521352090700000	286821875500000	207128121000000	154729755200000	125372156200000	1.03806e+14	88876147750000	74356671350000	6.31018e+13	54088477100000	46193773750000	37980654750000	30938404950000	24880393400000	1.92867e+13	1.44562e+13	9917478000000	5592287500000
64	335	140000000000000	515454009000000	310662625000000	238503563200000	188991495000000	159672685200000	137222925000000	1.20845e+14	1.03976e+14	9.02678e+13	78700052200000	6.82752e+13	5.71076e+13	4.71638e+13	38339499800000	30012285800000	2.26731e+13	1.5652e+13	8.86443e+12
64	336	132000000000000	485999494200000	292910475000000	224874788160000	178191981000000	150548531760000	129381615000000	1.1394e+14	9.8035e+13	8.51096e+13	74202906360000	6.43738e+13	5.38443e+13	4.44688e+13	36148671240000	28297298040000	2.13775e+13	1.47576e+13	8.35789e+12
64	337	139000000000000	511772194650000	308443606250000	236799966320000	187641555750000	158532166020000	136242761250000	1.19982e+14	1.03234e+14	8.9623e+13	78137908970000	6.77876e+13	5.66997e+13	4.68269e+13	38065646230000	29797912330000	2.25112e+13	1.55402e+13	8.80112e+12
64	338	151000000000000	5.55954e+14	335071831250000	257243128880000	203840826750000	172218396180000	148004726250000	1.3034e+14	1.12146e+14	9.73603e+13	84883627730000	73639725300000	6.15946e+13	5.08696e+13	41351889070000	32370393970000	2.44546e+13	1.68818e+13	9.56092e+12
64	339	160000000000000	589090296000000	355043000000000	272575500800000	215990280000000	182483068800000	156826200000000	1.38109e+14	1.1883e+14	1.03163e+14	89942916800000	78028848000000	6.52658e+13	5.39015e+13	43816571200000	34299755200000	2.59121e+13	17888006400000	1.01308e+13
64	340	160000000000000	589090296000000	355043000000000	272575500800000	215990280000000	182483068800000	156826200000000	1.38109e+14	1.1883e+14	1.03163e+14	89942916800000	78028848000000	6.52658e+13	5.39015e+13	43816571200000	34299755200000	2.59121e+13	17888006400000	1.01308e+13
64	341	161000000000000	592772110350000	357262018750000	274279097680000	217340219250000	183623587980000	157806363750000	1.38972e+14	1.19573e+14	1.03808e+14	90505060030000	78516528300000	6.56737e+13	5.42384e+13	44090424770000	34514128670000	2.60741e+13	17999806440000	1.01941e+13
64	342	163000000000000	600135739050000	361700056250000	277686291440000	220040097750000	185904626340000	159766691250000	1.40698e+14	1.21058e+14	1.05098e+14	91629346490000	79491888900000	6.64896e+13	5.49122e+13	44638131910000	34942875610000	2.6398e+13	18223406520000	1.03207e+13
64	343	151000000000000	5.55954e+14	335071831250000	257243128880000	203840826750000	172218396180000	148004726250000	1.3034e+14	1.12146e+14	9.73603e+13	84883627730000	73639725300000	6.15946e+13	5.08696e+13	41351889070000	32370393970000	2.44546e+13	1.68818e+13	9.56092e+12
64	344	149000000000000	548590338150000	330633793750000	253835935120000	201140948250000	169937357820000	146044398750000	1.28614e+14	1.10661e+14	9.60707e+13	83759341270000	72664364700000	6.07788e+13	5.01958e+13	40804181930000	31941647030000	2.41307e+13	1.66582e+13	9.43429e+12
64	345	157000000000000	578044852950000	348385943750000	267464710160000	211940462250000	179061511260000	153885708750000	1.35519e+14	1.16602e+14	1.01229e+14	88256487110000	76565807100000	6.40421e+13	5.28909e+13	42995010490000	33656634790000	2.54263e+13	1.75526e+13	9.94083e+12
64	346	157000000000000	578044852950000	348385943750000	267464710160000	211940462250000	179061511260000	153885708750000	1.35519e+14	1.16602e+14	1.01229e+14	88256487110000	76565807100000	6.40421e+13	5.28909e+13	42995010490000	33656634790000	2.54263e+13	1.75526e+13	9.94083e+12
64	347	158000000000000	581726667300000	350604962500000	269168307040000	213290401500000	180202030440000	154865872500000	1.36382e+14	1.17345e+14	1.01874e+14	88818630340000	77053487400000	6.445e+13	5.32278e+13	43268864060000	33871008260000	2.55882e+13	17664406320000	1.00041e+13
64	348	158000000000000	581726667300000	350604962500000	269168307040000	213290401500000	180202030440000	154865872500000	1.36382e+14	1.17345e+14	1.01874e+14	88818630340000	77053487400000	6.445e+13	5.32278e+13	43268864060000	33871008260000	2.55882e+13	17664406320000	1.00041e+13
64	349	159000000000000	585408481650000	352823981250000	270871903920000	214640340750000	181342549620000	155846036250000	1.37245e+14	1.18088e+14	1.02518e+14	89380773570000	77541167700000	6.48579e+13	5.35646e+13	43542717630000	34085381730000	2.57502e+13	17776206360000	1.00675e+13
64	350	0	0	0	0	0	0	0	0	0	0	0	0	0	0	0	0	0	0	0
63	280	0	0	0	0	0	0	0	0	0	0	0	0	0	0	0	0	0	0	0
63	281	0	0	0	0	0	0	0	0	0	0	0	0	0	0	0	0	0	0	0
63	282	0	0	0	0	0	0	0	0	0	0	0	0	0	0	0	0	0	0	0
63	283	0	0	0	0	0	0	0	0	0	0	0	0	0	0	0	0	0	0	0
63	284	0	0	0	0	0	0	0	0	0	0	0	0	0	0	0	0	0	0	0
63	285	0	0	0	0	0	0	0	0	0	0	0	0	0	0	0	0	0	0	0
63	286	0	0	0	0	0	0	0	0	0	0	0	0	0	0	0	0	0	0	0
63	287	0	0	0	0	0	0	0	0	0	0	0	0	0	0	0	0	0	0	0
63	288	0	0	0	0	0	0	0	0	0	0	0	0	0	0	0	0	0	0	0
63	289	0	0	0	0	0	0	0	0	0	0	0	0	0	0	0	0	0	0	0
63	290	0	0	0	0	0	0	0	0	0	0	0	0	0	0	0	0	0	0	0
[truncated: 983 more rows]

## Sheet: January 17
		Downwelling Surface	Actinic Flux (photons/cm2*nm*s) at Various Snow Depths (cm)
Solar Zenith Angle	Wavelength (nm)	Irradiance (photons/cm2*s*nm)	0	1	2	3	4	5	6	7	8
90	280	0	0	0	0	0	0	0	0	0	0
90	281	0	0	0	0	0	0	0	0	0	0
[truncated: 2,909 more rows]

## Sheet: January 20
		Downwelling Surface	Actinic Flux (photons/cm2*nm*s) at Various Snow Depths (cm)
[truncated: 2,912 more rows]

[truncated: 9 more sheets: January 22, January 24, January 26, January 29, January 30, January 31, February 4, February 6, February 11]
