# Supplementary material for: The magnitude of the snow-sourced reactive nitrogen flux to the boundary layer in the Uintah Basin, Utah, USA
Source: Copernicus journal article supplement (doi:10.5194/acp-2016-320), 2016-05-17
Supplement: Supplementary file 1 [file acp-2016-320-supplement.zip › Zatko_etal_2016_SupplementaryMaterial.pdf]

Supplemental Material A: Observations of and calculations for each snowpit

Table 1A. Description of snowpits dug during the UBWOS 2014 campaign.

| Pit | Date<br>Time           | Meteorology                                                                 | Snow depth<br>(cm) |
|-----|------------------------|-----------------------------------------------------------------------------|--------------------|
| 1   | Jan. 15<br>10:00-13:00 | Clear, calm winds,<br>Air temperature <sup>1</sup> : -10°C, -3°C            | 18                 |
| 2   | Jan. 17<br>9:00-14:00  | Clear, calm winds,<br>Air temperature <sup>1</sup> : -10°C, -3°C            | 9                  |
| 3   | Jan. 20<br>10:00-13:00 | Clear, calm winds,<br>Air temperature <sup>1</sup> : -9°C, -4°C             | 14                 |
| 4   | Jan. 22<br>10:00-13:00 | Clear, calm winds,<br>Air temperature <sup>1</sup> : -15°C, -1°C            | 18                 |
| 5   | Jan. 24<br>10:00-12:00 | Clear, calm winds,<br>Air temperature <sup>1</sup> : -14°C, -9°C            | 11                 |
| 6   | Jan. 26<br>10:00-13:00 | Clear, calm winds,<br>Air temperature <sup>1</sup> : -6°C, -2°C             | 18                 |
| 7   | Jan. 29<br>10:30-12:30 | Cloudy, calm winds,<br>Air temperature <sup>1</sup> : -10°C, -5°C           | 20                 |
| 8   | Jan. 30<br>10:00-11:30 | Cloudy, calm winds, light snow<br>Air temperature <sup>1</sup> : -2°C, -1°C | 15                 |
| 9   | Jan. 31<br>13:00-14:30 | Partly cloudy, calm winds<br>Air temperature <sup>1</sup> : -2°C, -1°C      | 14                 |
| 10  | Feb. 4<br>10:00-12:30  | Cloudy, calm winds<br>Air temperature <sup>1</sup> : -8°C, -2°C             | 24                 |
| 11  | Feb. 6<br>10:00-12:00  | Cloudy, calm winds,<br>Air temperature <sup>1</sup> : -13°C, -7°C           | 21                 |
| 12  | Feb. 11<br>9:00-10:30  | Cloudy, calm winds,<br>Air temperature <sup>1</sup> : -2°C, 2°C             | 20                 |

<sup>1</sup>Temperature was measured before and after each snowpit was dug.

Table 2A. Vertical profiles of snow temperature (K). Snow temperature was not measured for snowpits 1, 2, and 3.

| Snowpit | Temperature (K) at various depths                             |
|---------|---------------------------------------------------------------|
| 1       | Temperature not measured                                      |
| 2       | Temperature not measured                                      |
| 3       | Temperature not measured                                      |
| 4       | 0-18 cm: 267                                                  |
| 5       | 0-11 cm: 267                                                  |
| 6       | 0-7 cm: 273<br>7-18 cm: 267                                   |
| 7       | 0-7 cm: 271<br>7-17 cm: 268<br>17-20 cm: 268                  |
| 8       | 0-4 cm: 273<br>4-12 cm: 271<br>12-15: 270                     |
| 9       | 0-14 cm: 272                                                  |
| 10      | 0-3 cm: 265<br>3-10 cm: 266<br>10-21 cm: 267<br>21-24 cm: 269 |
| 11      | 0-3 cm: 258<br>3-10 cm: 260<br>10-17 cm: 261<br>17-21 cm: 263 |
| 12      | 0-3 cm: 271<br>3-20: 272                                      |

Table 3A. Snow photic zone depth, modeled  $F_{Nr}$  using only E8, and daily-averaged  $F_{Nr}$  calculated using TRANSITS for all snowpits.

| Pit | Photic zone depth (cm) | $F_{Nr}$<br>(E8, SZA=65°)<br>(molec cm <sup>-2</sup> s <sup>-1</sup> ) | Daily-averaged<br>$F_{Nr}$<br>(TRANSITS)<br>(molec cm <sup>-2</sup> s <sup>-1</sup> ) | Daily-maximum<br>$F_{Nr}$<br>(TRANSITS)<br>(molec cm <sup>-2</sup> s <sup>-1</sup> ) |
|-----|------------------------|------------------------------------------------------------------------|---------------------------------------------------------------------------------------|--------------------------------------------------------------------------------------|
| 1   | 8.5                    | 1.2x10 <sup>9</sup>                                                    | 5.4x10 <sup>8</sup>                                                                   | 2.6x10 <sup>9</sup>                                                                  |
| 2   | 5.5                    | 7.7x10 <sup>8</sup>                                                    | 5.6x10 <sup>8</sup>                                                                   | 2.6x10 <sup>9</sup>                                                                  |
| 3   | 5.5                    | 7.3x10 <sup>8</sup>                                                    | 6.0x10 <sup>8</sup>                                                                   | 2.9x10 <sup>9</sup>                                                                  |
| 4   | 5.0                    | 5.6x10 <sup>8</sup>                                                    | 6.3x10 <sup>8</sup>                                                                   | 3.0x10 <sup>9</sup>                                                                  |
| 5   | 6.5                    | 8.0x10 <sup>8</sup>                                                    | 6.5x10 <sup>8</sup>                                                                   | 3.0x10 <sup>9</sup>                                                                  |
| 6   | 6.0                    | 5.9x10 <sup>8</sup>                                                    | 6.8x10 <sup>8</sup>                                                                   | 3.1x10 <sup>9</sup>                                                                  |
| 7   | 5.5                    | 5.6x10 <sup>8</sup>                                                    | 7.1x10 <sup>8</sup>                                                                   | 3.1x10 <sup>9</sup>                                                                  |
| 8   | 7.0                    | 1.0x10 <sup>9</sup>                                                    | 7.2x10 <sup>8</sup>                                                                   | 3.1x10 <sup>9</sup>                                                                  |
| 9   | 7.0                    | 1.9x10 <sup>8</sup>                                                    | 5.6x10 <sup>7</sup>                                                                   | 2.4x10 <sup>8</sup>                                                                  |
| 10  | 7.0                    | 3.2x10 <sup>8</sup>                                                    | 1.2x10 <sup>8</sup>                                                                   | 4.7x10 <sup>8</sup>                                                                  |
| 11  | 6.0                    | 2.7x10 <sup>8</sup>                                                    | 1.5x10 <sup>8</sup>                                                                   | 5.8x10 <sup>8</sup>                                                                  |
| 12  | 5.0                    | 5.5x10 <sup>7</sup>                                                    | 2.1x10 <sup>8</sup>                                                                   | 7.9x10 <sup>8</sup>                                                                  |

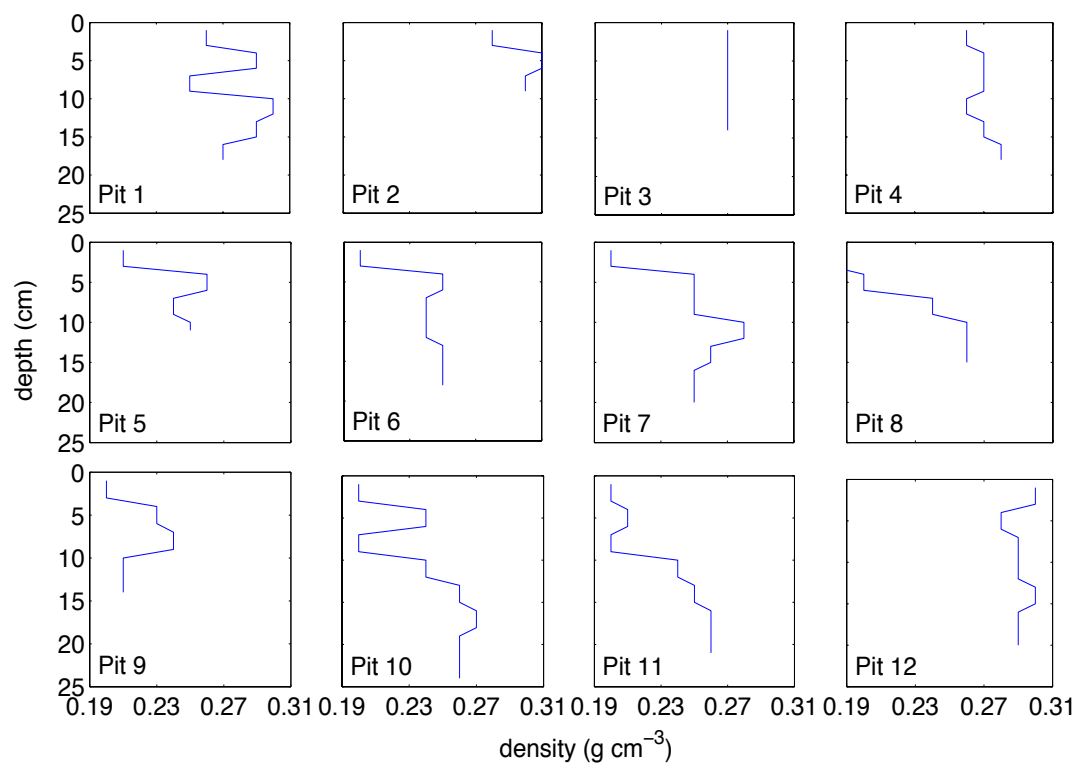

Figure 1A. Vertical profiles of snow density.

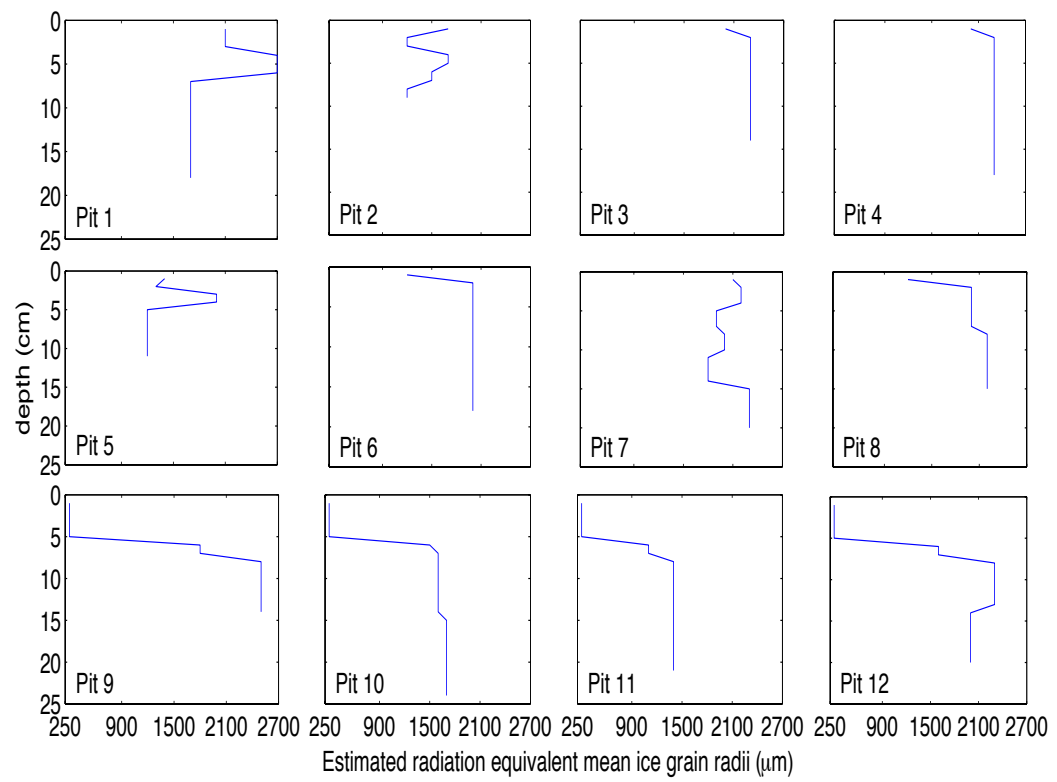

Figure 2A. Vertical profiles of visually-estimated radiation equivalent mean ice grain radii ( $\mu\text{m}$ ).

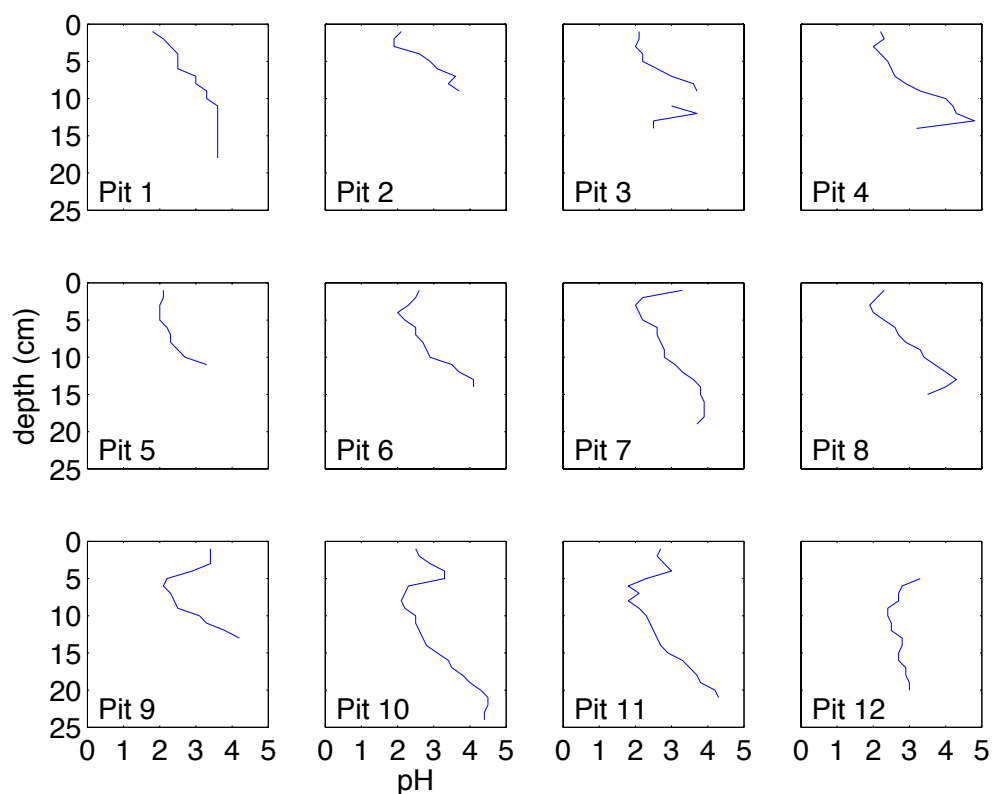

Figure 3A. Vertical profiles of pH in snow calculated using ion balance ( $[H^+] = [Cl^-] + [NO_3^-] + [SO_4^{2-}] - [Na^+] - [NH_4^+] - [K^+] - [Mg^{2+}] - [Ca^{2+}]$ ), where  $pH = -\log_{10}[H^+]$  and  $H^+$  is expressed in M.

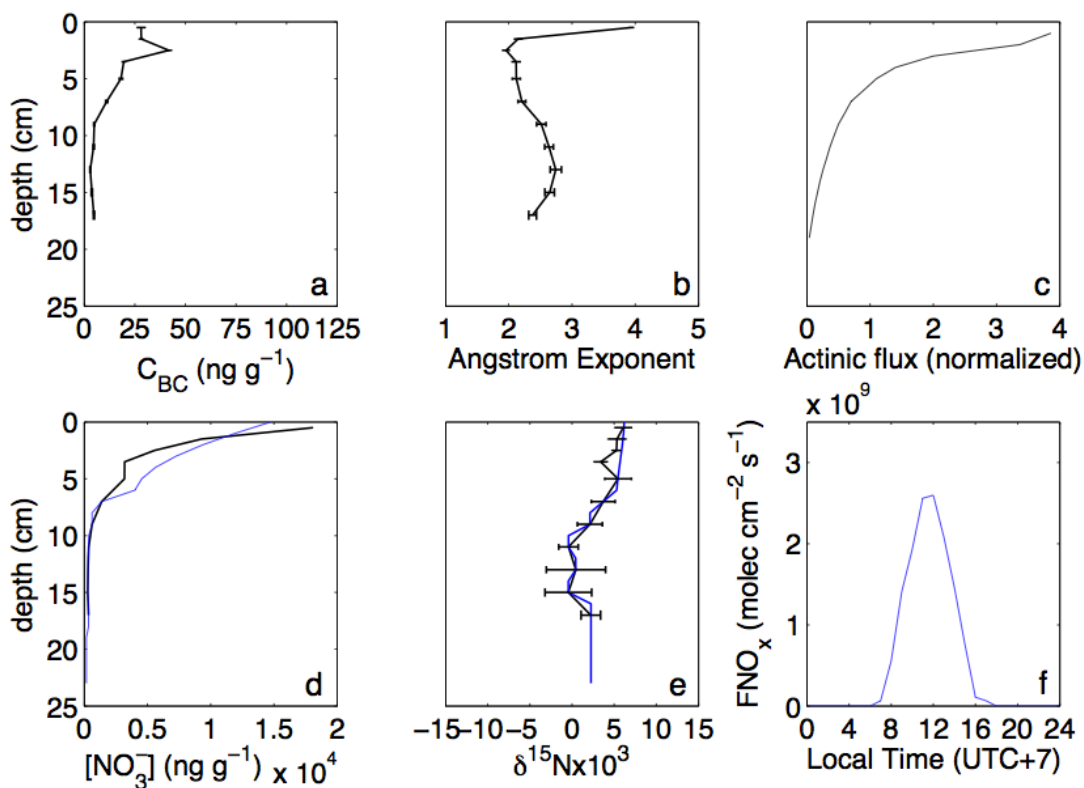

Figure 4A. Measured and modeled snow optical and chemical properties on January 15, 2014. Vertical profiles of (a) Measured black carbon concentrations ( $C_{BC}$ , ng g<sup>-1</sup>), (b) Measured Ångström exponent for  $\lambda=450-600$  nm (unitless), (c) UV actinic flux normalized to surface downwelling irradiance, (d) Measured (black) and modeled (blue) nitrate concentrations (ng g<sup>-1</sup>), (e) Measured (black) and modeled (blue)  $\delta^{15}N(NO_3^-)$  when  $\Phi=4.6 \times 10^{-3}$  (‰), (f) Diurnal profiles of modeled snow-sourced  $F_{Nr}$  (molec cm<sup>-2</sup> s<sup>-1</sup>) from TRANSITS.

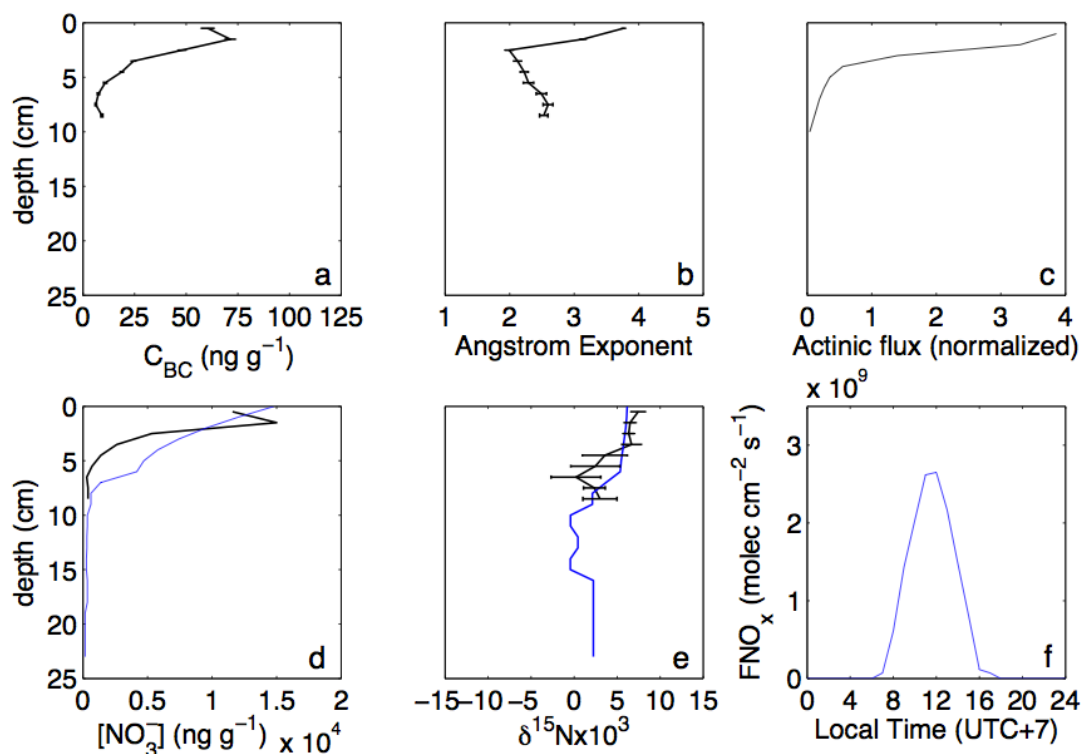

Figure 5A. Measured and modeled snow optical and chemical properties on January 17, 2014. Vertical profiles of (a) Measured black carbon concentrations ( $C_{BC}$ , ng g<sup>-1</sup>), (b) Measured Ångström exponent for  $\lambda=450-600$  nm (unitless), (c) UV actinic flux normalized to surface downwelling irradiance, (d) Measured (black) and modeled (blue) nitrate concentrations (ng g<sup>-1</sup>), (e) Measured (black) and modeled (blue)  $\delta^{15}N(NO_3^-)$  when  $\Phi=4.6 \times 10^{-3}$  (‰), (f) Diurnal profiles of modeled snow-sourced  $F_{Nr}$  (molec cm<sup>-2</sup> s<sup>-1</sup>) from TRANSITS.

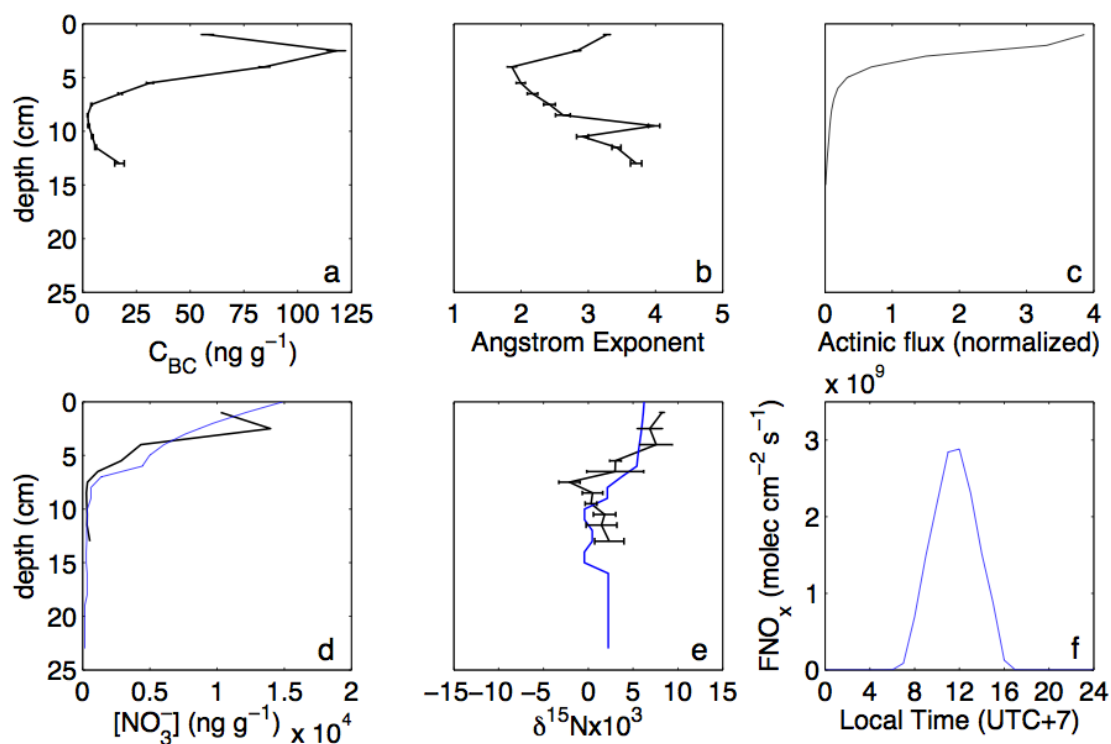

Figure 6A. Measured and modeled snow optical and chemical properties on January 20, 2014. Vertical profiles of (a) Measured black carbon concentrations ( $C_{BC}$ ,  $\text{ng g}^{-1}$ ), (b) Measured Ångström exponent for  $\lambda=450\text{-}600$  nm (unitless), (c) UV actinic flux normalized to surface downwelling irradiance, (d) Measured (black) and modeled (blue) nitrate concentrations ( $\text{ng g}^{-1}$ ), (e) Measured (black) and modeled (blue)  $\delta^{15}\text{N}(\text{NO}_3^-)$  when  $\Phi=4.6 \times 10^{-3}$  (‰), (f) Diurnal profiles of modeled snow-sourced  $F_{\text{NO}_x}$  ( $\text{molec cm}^{-2} \text{s}^{-1}$ ) from TRANSITS.

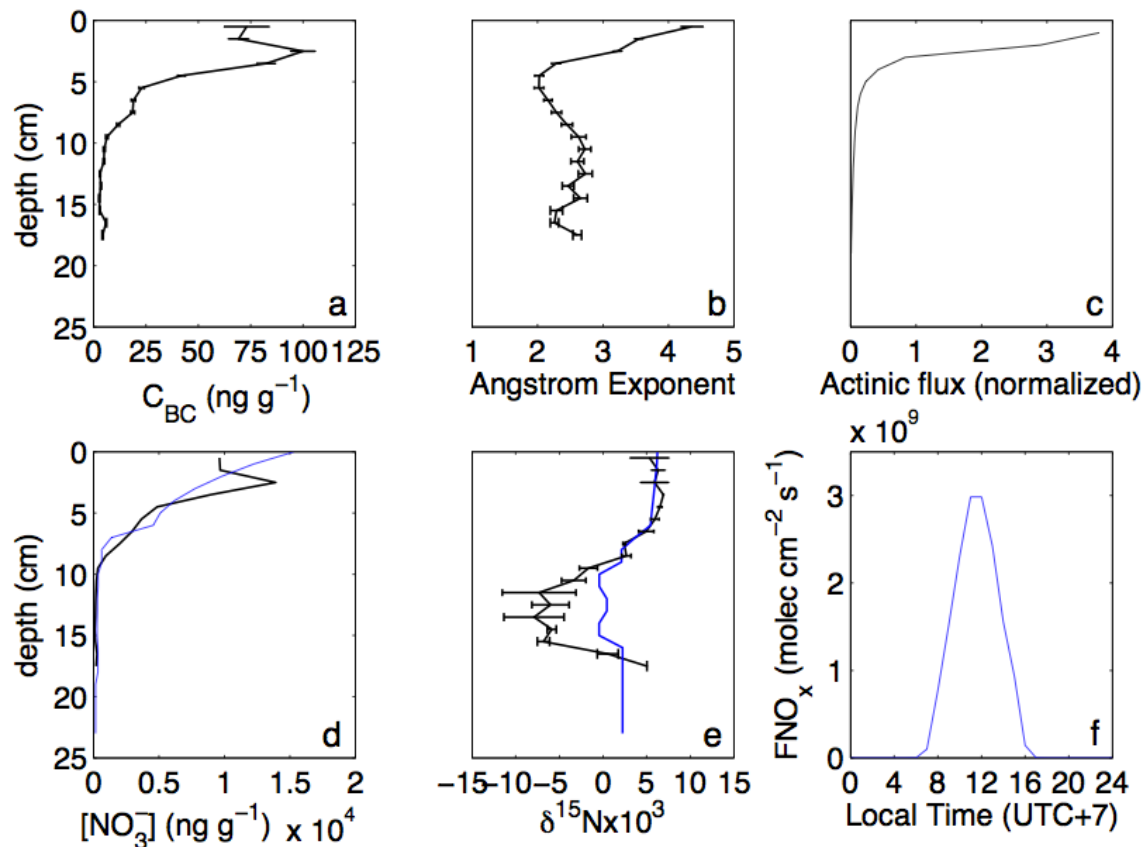

Figure 7A. Measured and modeled snow optical and chemical properties on January 22, 2014. Vertical profiles of (a) Measured black carbon concentrations ( $C_{BC}$ ,  $\text{ng g}^{-1}$ ), (b) Measured Ångström exponent for  $\lambda=450\text{-}600$  nm (unitless), (c) UV actinic flux normalized to surface downwelling irradiance, (d) Measured (black) and modeled (blue) nitrate concentrations ( $\text{ng g}^{-1}$ ), (e) Measured (black) and modeled (blue)  $\delta^{15}\text{N}(\text{NO}_3^-)$  when  $\Phi=4.6 \times 10^{-3}$  (‰), (f) Diurnal profiles of modeled snow-sourced  $F_{\text{NO}_x}$  ( $\text{molec cm}^{-2} \text{s}^{-1}$ ) from TRANSITS.

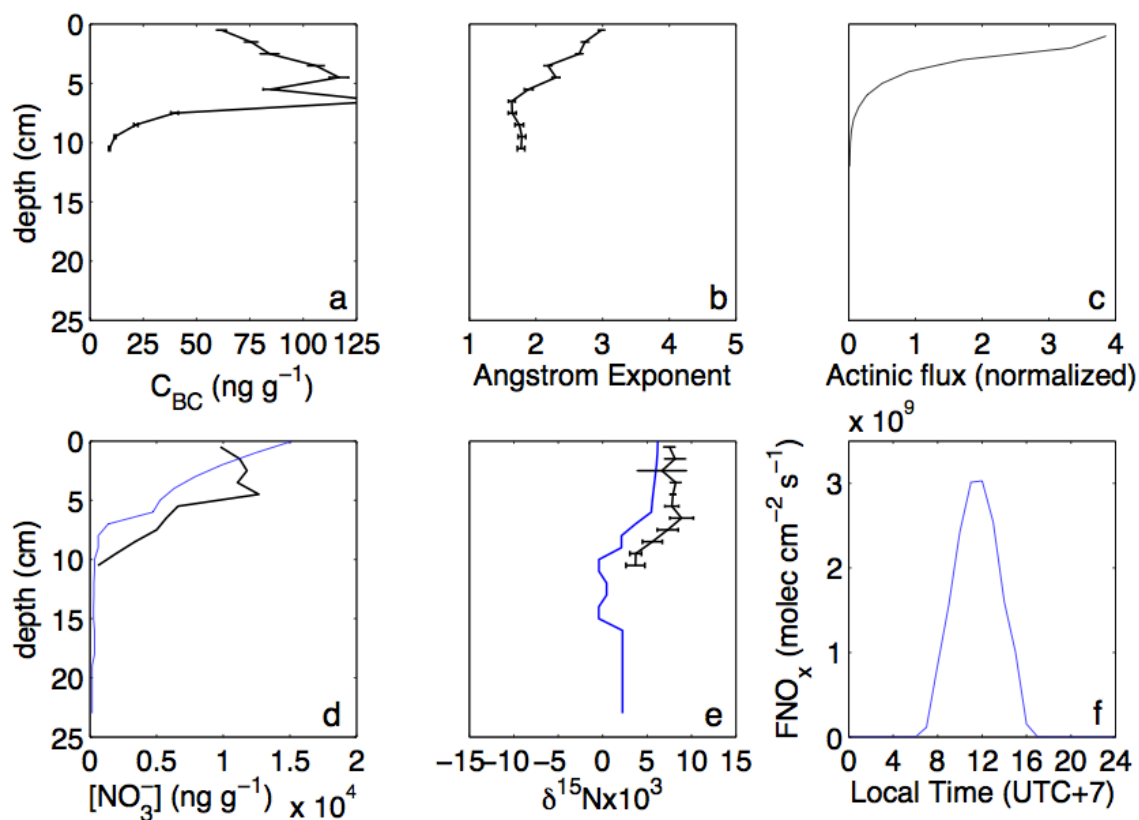

Figure 8A. Measured and modeled snow optical and chemical properties on January 24, 2014. Vertical profiles of (a) Measured black carbon concentrations ( $C_{BC}$ ,  $\text{ng g}^{-1}$ ), (b) Measured Ångström exponent for  $\lambda=450-600$  nm (unitless), (c) UV actinic flux normalized to surface downwelling irradiance, (d) Measured (black) and modeled (blue) nitrate concentrations ( $\text{ng g}^{-1}$ ), (e) Measured (black) and modeled (blue)  $\delta^{15}\text{N}(\text{NO}_3^-)$  when  $\Phi=4.6 \times 10^{-3}$  (‰), (f) Diurnal profiles of modeled snow-sourced  $F_{Nr}$  ( $\text{molec cm}^{-2} \text{s}^{-1}$ ) from TRANSITS.

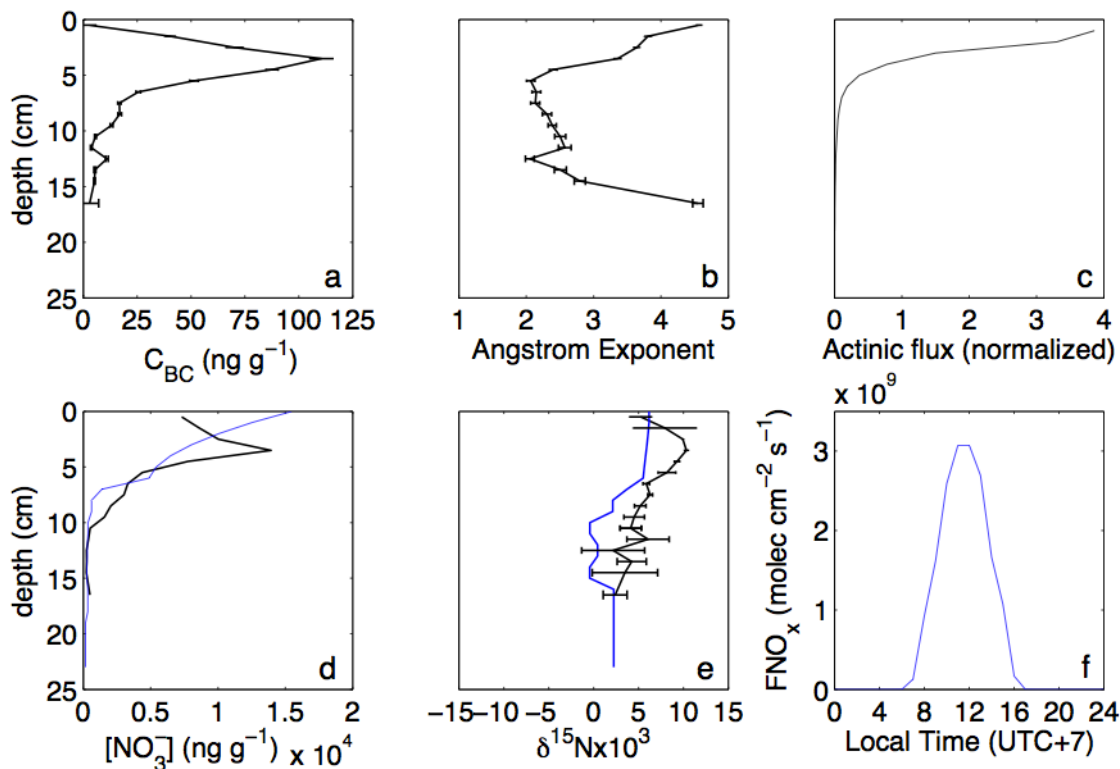

Figure 9A. Measured and modeled snow optical and chemical properties on January 26, 2014. Vertical profiles of (a) Measured black carbon concentrations ( $C_{BC}$ ,  $\text{ng g}^{-1}$ ), (b) Measured Ångström exponent for  $\lambda=450-600$  nm (unitless), (c) UV actinic flux normalized to surface downwelling irradiance, (d) Measured (black) and modeled (blue) nitrate concentrations ( $\text{ng g}^{-1}$ ), (e) Measured (black) and modeled (blue)  $\delta^{15}\text{N}(\text{NO}_3^-)$  when  $\Phi=4.6 \times 10^{-3}$  (‰), (f) Diurnal profiles of modeled snow-sourced  $F_{\text{NO}_x}$  ( $\text{molec cm}^{-2} \text{s}^{-1}$ ) from TRANSITS.

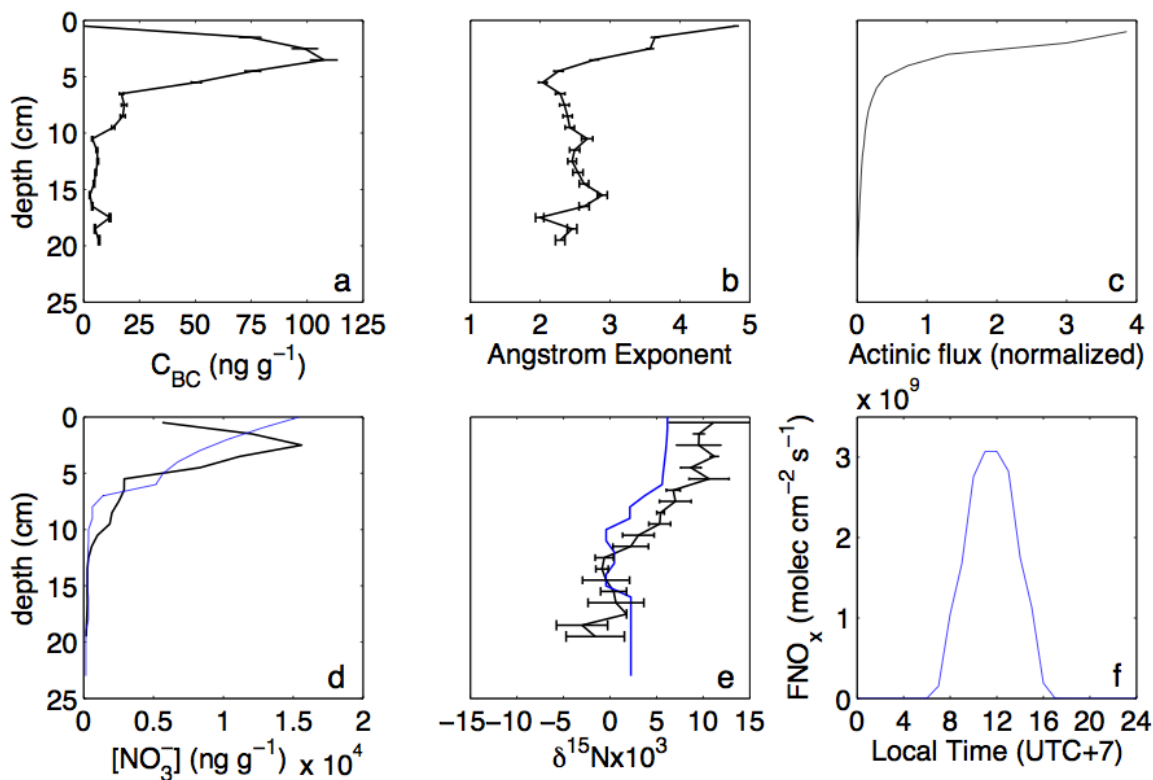

Figure 10A. Measured and modeled snow optical and chemical properties on January 29, 2014. Vertical profiles of (a) Measured black carbon concentrations ( $C_{BC}$ ,  $\text{ng g}^{-1}$ ), (b) Measured Ångström exponent for  $\lambda=450-600$  nm (unitless), (c) UV actinic flux normalized to surface downwelling irradiance, (d) Measured (black) and modeled (blue) nitrate concentrations ( $\text{ng g}^{-1}$ ), (e) Measured (black) and modeled (blue)  $\delta^{15}\text{N}(\text{NO}_3^-)$  when  $\Phi=4.6 \times 10^{-3}$  (‰), (f) Diurnal profiles of modeled snow-sourced  $F_{\text{NO}_x}$  ( $\text{molec cm}^{-2} \text{s}^{-1}$ ) from TRANSITS.

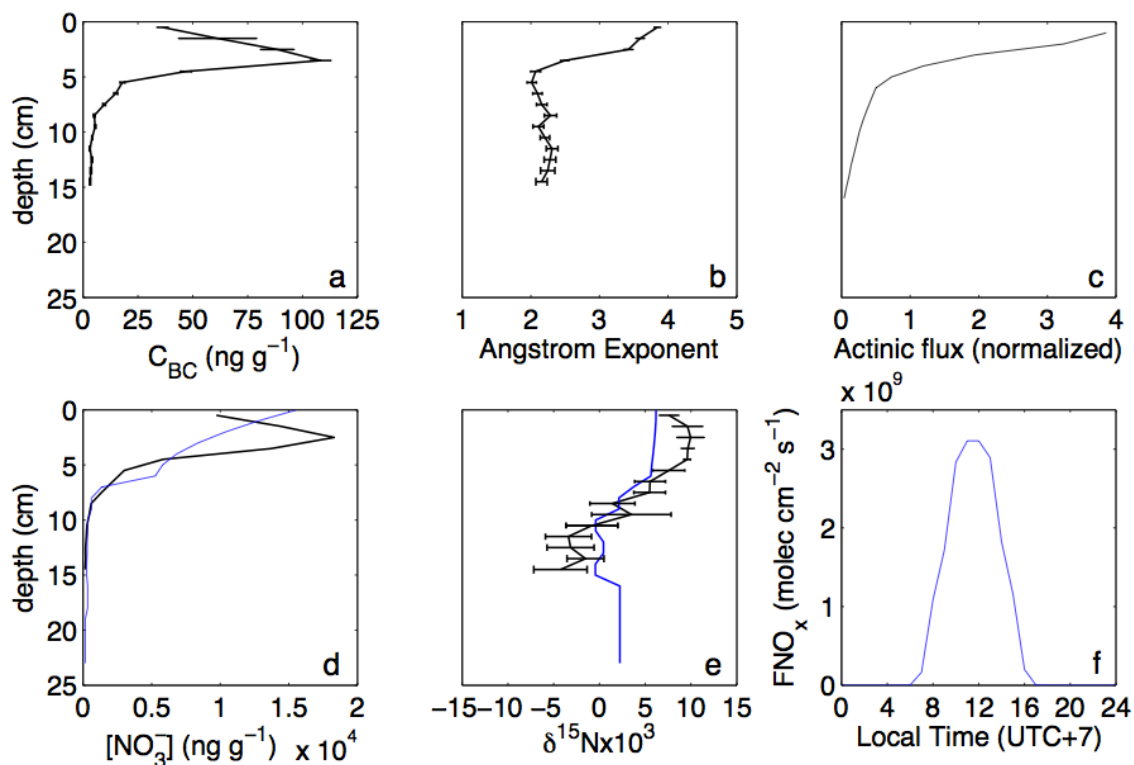

Figure 11A. Measured and modeled snow optical and chemical properties on January 30, 2014. Vertical profiles of (a) Measured black carbon concentrations ( $C_{BC}$ , ng g<sup>-1</sup>), (b) Measured Ångström exponent for  $\lambda=450-600$  nm (unitless), (c) UV actinic flux normalized to surface downwelling irradiance, (d) Measured (black) and modeled (blue) nitrate concentrations (ng g<sup>-1</sup>), (e) Measured (black) and modeled (blue)  $\delta^{15}N(NO_3^-)$  when  $\Phi=4.6 \times 10^{-3}$  (‰), (f) Diurnal profiles of modeled snow-sourced  $F_{Nr}$  (molec cm<sup>-2</sup> s<sup>-1</sup>) from TRANSITS.

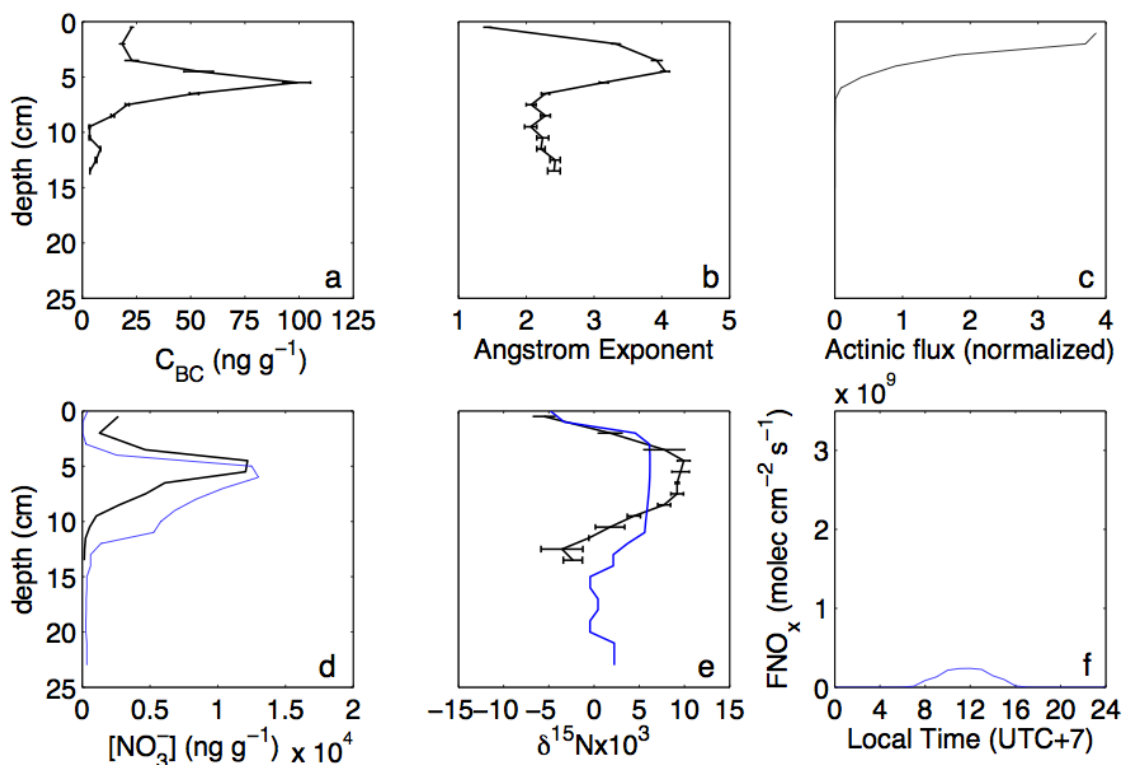

Figure 12A. Measured and modeled snow optical and chemical properties on January 31, 2014. Vertical profiles of (a) Measured black carbon concentrations ( $C_{BC}$ , ng g<sup>-1</sup>), (b) Measured Ångström exponent for  $\lambda=450-600$  nm (unitless), (c) UV actinic flux normalized to surface downwelling irradiance, (d) Measured (black) and modeled (blue) nitrate concentrations (ng g<sup>-1</sup>), (e) Measured (black) and modeled (blue)  $\delta^{15}N(NO_3^-)$  when  $\Phi=4.6 \times 10^{-3}$  (‰), (f) Diurnal profiles of modeled snow-sourced  $F_{NO_x}$  (molec cm<sup>-2</sup> s<sup>-1</sup>) from TRANSITS.

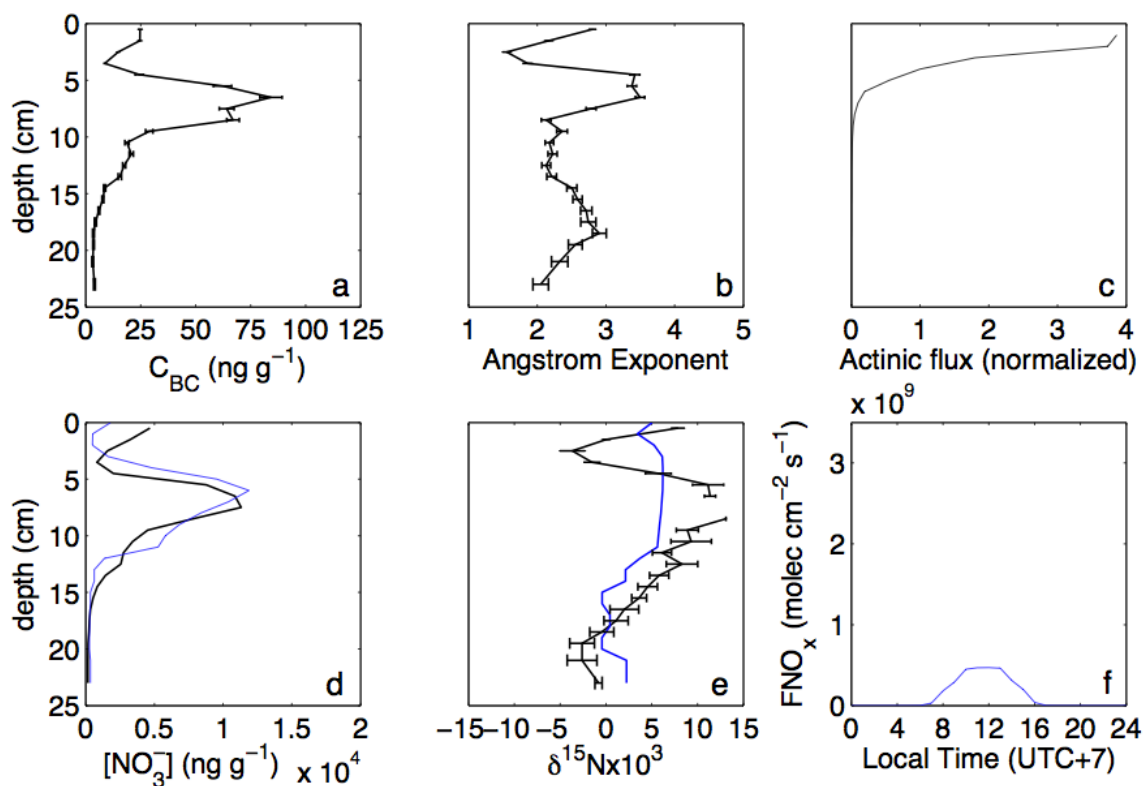

Figure 13A. Measured and modeled snow optical and chemical properties on February 4, 2014. Vertical profiles of (a) Measured black carbon concentrations ( $C_{BC}$ ,  $\text{ng g}^{-1}$ ), (b) Measured Ångström exponent for  $\lambda=450\text{-}600$  nm (unitless), (c) UV actinic flux normalized to surface downwelling irradiance, (d) Measured (black) and modeled (blue) nitrate concentrations ( $\text{ng g}^{-1}$ ), (e) Measured (black) and modeled (blue)  $\delta^{15}\text{N}(\text{NO}_3^-)$  when  $\Phi=4.6 \times 10^{-3}$  (‰), (f) Diurnal profiles of modeled snow-sourced  $F_{Nr}$  ( $\text{molec cm}^{-2} \text{s}^{-1}$ ) from TRANSITS.

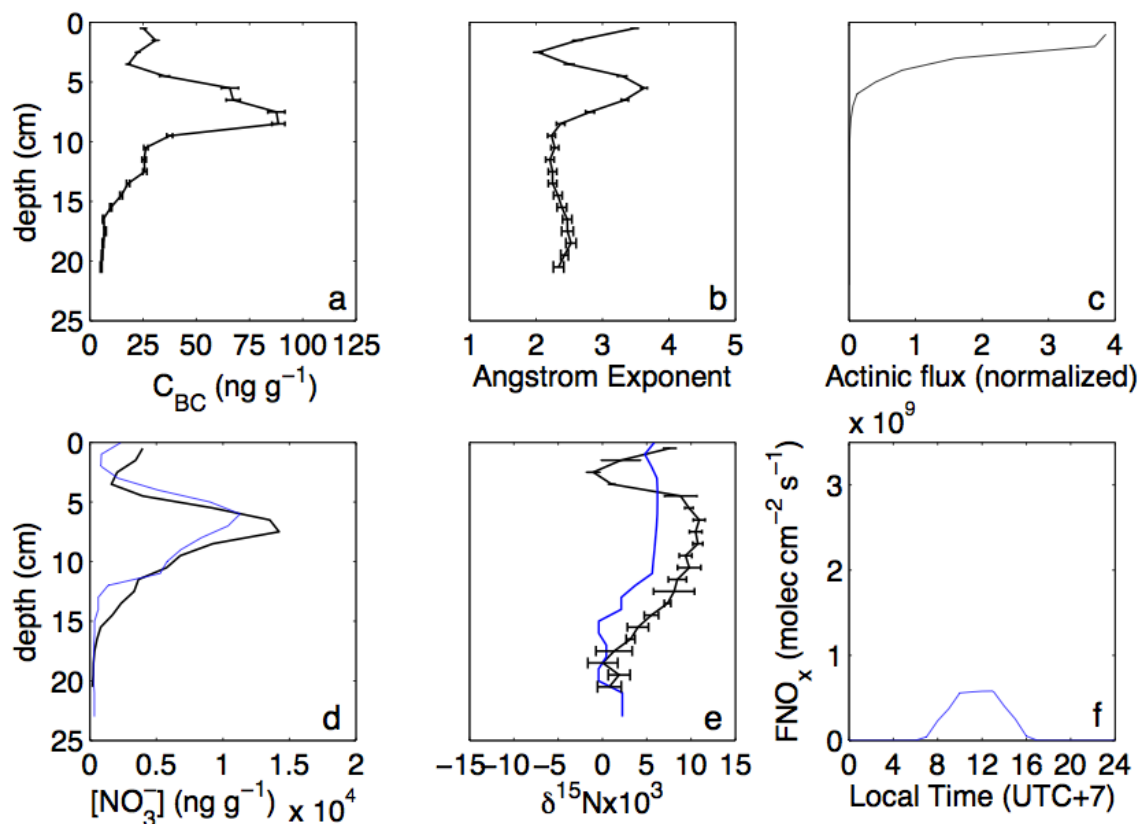

Figure 14A. Measured and modeled snow optical and chemical properties on February 6, 2014. Vertical profiles of (a) Measured black carbon concentrations ( $C_{BC}$ ,  $\text{ng g}^{-1}$ ), (b) Measured Ångström exponent for  $\lambda=450-600$  nm (unitless), (c) UV actinic flux normalized to surface downwelling irradiance, (d) Measured (black) and modeled (blue) nitrate concentrations ( $\text{ng g}^{-1}$ ), (e) Measured (black) and modeled (blue)  $\delta^{15}\text{N}(\text{NO}_3^-)$  when  $\Phi=4.6 \times 10^{-3}$  (‰), (f) Diurnal profiles of modeled snow-sourced  $F_{Nr}$  ( $\text{molec cm}^{-2} \text{s}^{-1}$ ) from TRANSITS.

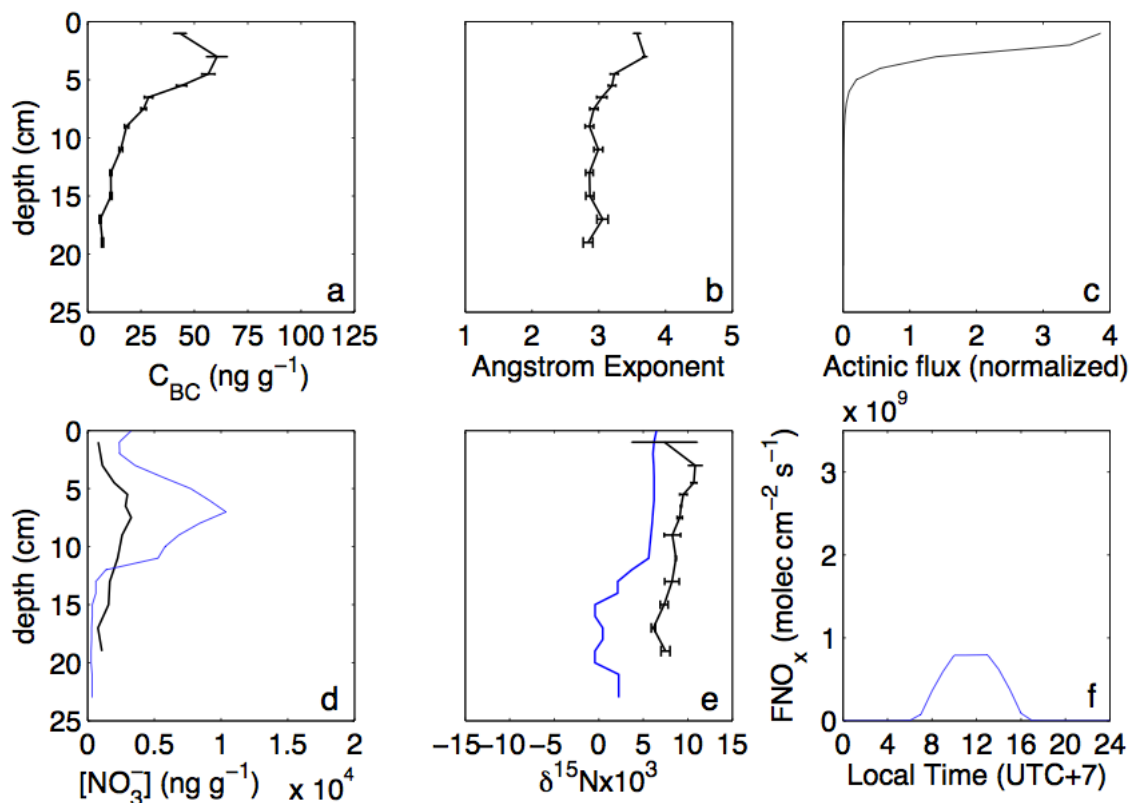

Figure 15A. Measured and modeled snow optical and chemical properties on February 11, 2014. Vertical profiles of (a) Measured black carbon concentrations ( $C_{BC}$ , ng g<sup>-1</sup>), (b) Measured Ångström exponent for  $\lambda=450-600$  nm (unitless), (c) UV actinic flux normalized to surface downwelling irradiance, (d) Measured (black) and modeled (blue) nitrate concentrations (ng g<sup>-1</sup>), (e) Measured (black) and modeled (blue)  $\delta^{15}N(NO_3^-)$  when  $\Phi=4.6 \times 10^{-3}$  (‰), (f) Diurnal profiles of modeled snow-sourced  $F_{Nr}$  (molec cm<sup>-2</sup> s<sup>-1</sup>) from TRANSITS.

## Supplemental Material B: Atmospheric observations and calculations

Table 1B. Modeled gas-phase ( $\text{HNO}_3$ ) and aerosol ( $\text{NO}_3^-$ ) nitrate dry-deposition flux to snow from model start date (12/19) to date of each snowpit<sup>a</sup>.

| Pit | Deposition to snow ( $\text{kg nitrate m}^{-2} \text{yr}^{-1}$ ) |                      |                                |
|-----|------------------------------------------------------------------|----------------------|--------------------------------|
|     | $\text{HNO}_3$                                                   | $\text{NO}_3^-$      | $\text{HNO}_3 + \text{NO}_3^-$ |
| 1   | $4.2 \times 10^{-6}$                                             | $4.2 \times 10^{-6}$ | $8.4 \times 10^{-6}$           |
| 2   | $4.5 \times 10^{-6}$                                             | $4.5 \times 10^{-6}$ | $9.0 \times 10^{-6}$           |
| 3   | $4.9 \times 10^{-6}$                                             | $4.9 \times 10^{-6}$ | $9.8 \times 10^{-6}$           |
| 4   | $5.2 \times 10^{-6}$                                             | $5.2 \times 10^{-6}$ | $1.0 \times 10^{-5}$           |
| 5   | $5.5 \times 10^{-6}$                                             | $5.5 \times 10^{-6}$ | $1.1 \times 10^{-5}$           |
| 6   | $5.8 \times 10^{-6}$                                             | $5.8 \times 10^{-6}$ | $1.2 \times 10^{-5}$           |
| 7   | $6.3 \times 10^{-6}$                                             | $6.3 \times 10^{-6}$ | $1.3 \times 10^{-5}$           |
| 8   | $6.4 \times 10^{-6}$                                             | $6.4 \times 10^{-6}$ | $1.3 \times 10^{-5}$           |
| 9   | $6.6 \times 10^{-6}$                                             | $6.6 \times 10^{-6}$ | $1.3 \times 10^{-5}$           |
| 10  | $7.2 \times 10^{-6}$                                             | $7.2 \times 10^{-6}$ | $1.4 \times 10^{-5}$           |
| 11  | $7.5 \times 10^{-6}$                                             | $7.5 \times 10^{-6}$ | $1.5 \times 10^{-5}$           |
| 12  | $8.2 \times 10^{-6}$                                             | $8.2 \times 10^{-6}$ | $1.6 \times 10^{-5}$           |

<sup>a</sup>Dry-deposition of  $\text{HNO}_3$  and  $\text{NO}_3^-$  to snow is calculated using the campaign-averaged observed boundary layer mixing ratios for  $\text{HNO}_3$  ( $5784 \text{ ng m}^{-3}$ ) and  $\text{NO}_3^-$  ( $5777 \text{ ng m}^{-3}$ ) and an assumed dry-deposition velocity of  $0.03 \text{ cm s}^{-1}$ .

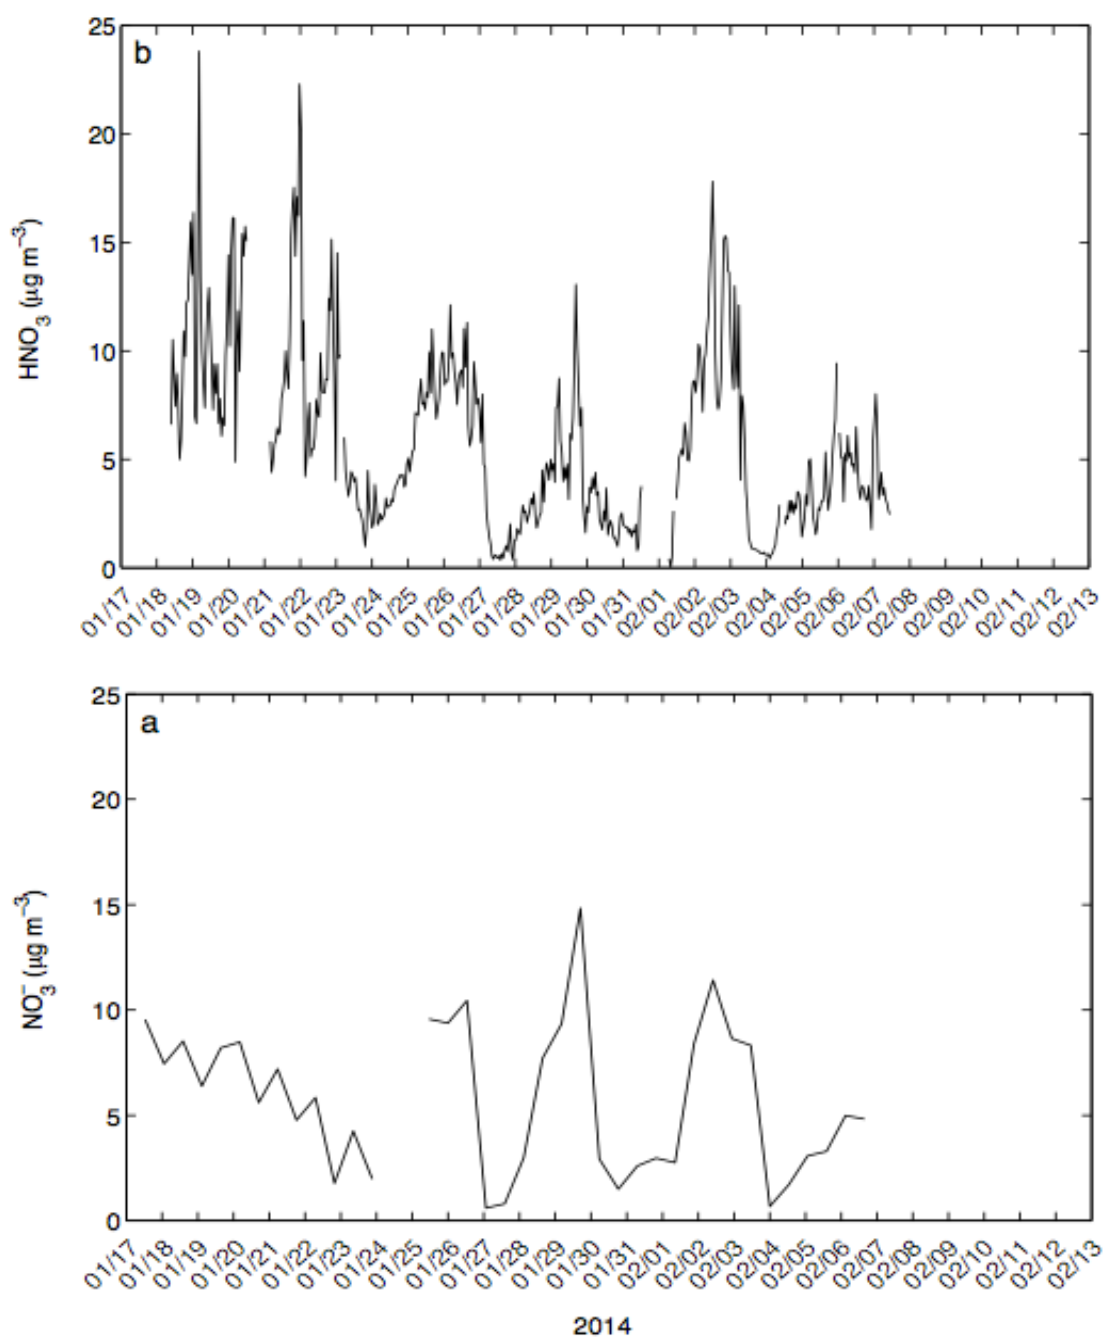

Figure 1B. (a) Atmospheric  $\text{NO}_3^-$  and (b)  $\text{HNO}_3$  during UBWOS2014 (units:  $\mu\text{g m}^{-3}$ ).  $\text{HNO}_3$  was measured every minute throughout the campaign and 1-hour averages are presented here.

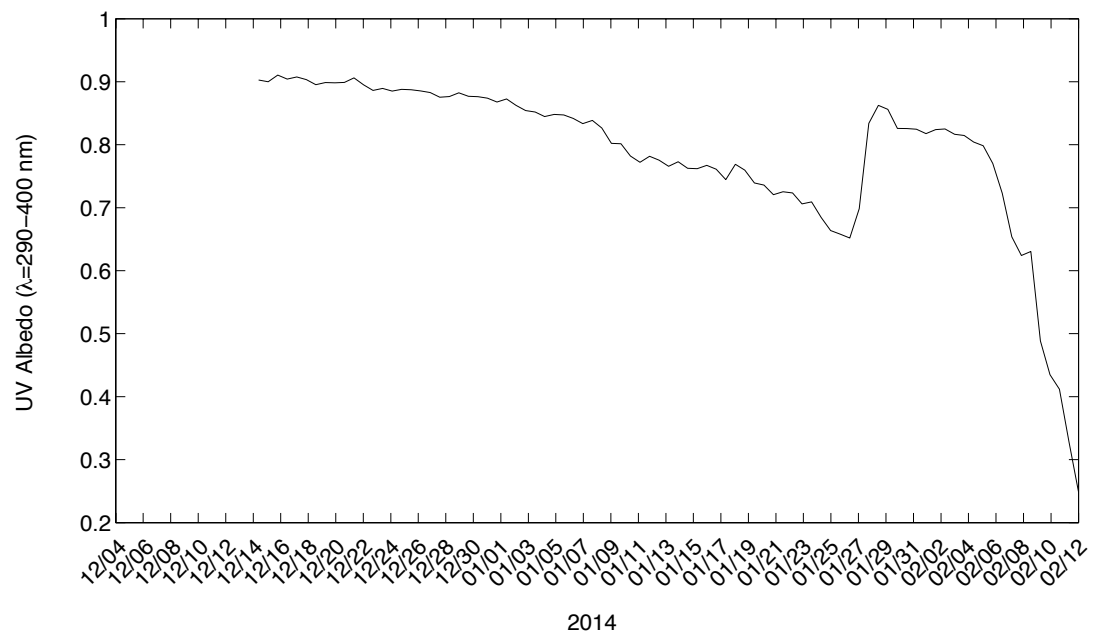

Figure 2B. Surface snow UV albedo ( $\lambda=290-400$  nm) measurements before and during the campaign.
