# Supplementary figures and images for: The magnitude of the snow-sourced reactive nitrogen flux to the boundary layer in the Uintah Basin, Utah, USA
Source: Copernicus journal article supplement (doi:10.5194/acp-2016-320), 2016-05-17

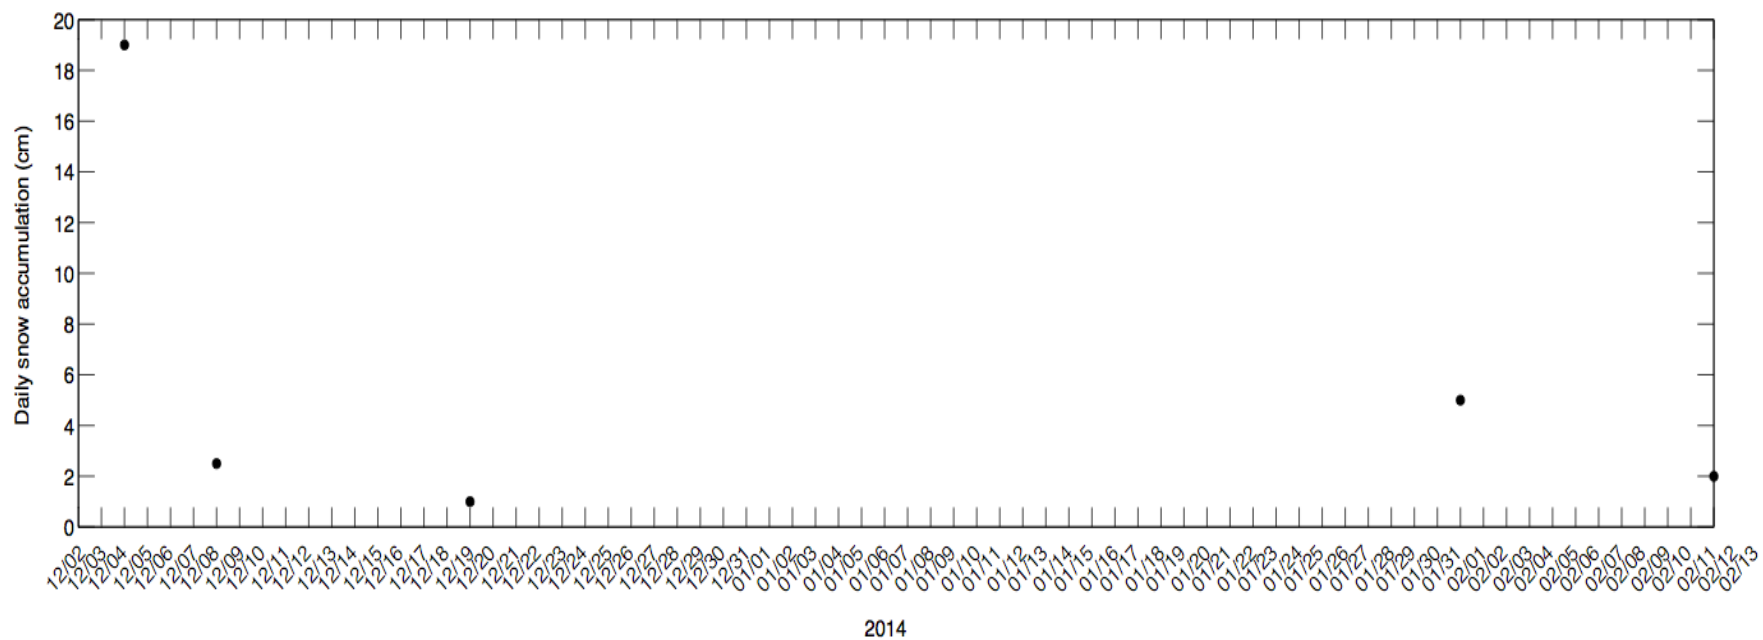

Figure 3B. Daily snowfall totals before and during the campaign.

Supplement: Supplementary file 1 [file acp-2016-320-supplement.zip › Zatko_etal_2016_SupplementaryMaterial.2.pdf]
